# Supplementary material for: Unequivocal structure confirmation of a breitfussin analog by anisotropic NMR measurements
Source: Royal Society of Chemistry journal article supplement (doi:10.1039/d0sc03664a), 2020-01-01
Supplement: d0sc03664a1.pdf [file d0sc03664a1.pdf]

# Unequivocal Structure Confirmation of a Breitfussin Analog by Anisotropic NMR Measurements

Ikenna E. Ndukwe, Yu-hong Lam, Sunil K. Pandey, Bengt E. Haug, Annette Bayer, Edward C. Sherer, Kirill A. Blinov, R. Thomas Williamson, Johan Isaksson, Mikhail Reibarkh, Yizhou Liu\* and Gary E. Martin\*

## Supplemental Information

### Table of Contents

|                                                                               |     |
|-------------------------------------------------------------------------------|-----|
| List of Figures .....                                                         | S3  |
| List of Tables .....                                                          | S4  |
| Structures of two Breitfussin Analogs, Cephalandole A and Flavonol .....      | S5  |
| Experimental .....                                                            | S6  |
| Poly-HEMA/MMA Co-polymer Gel Preparation .....                                | S9  |
| Gel sample preparation and data acquisition .....                             | S9  |
| Breitfussin A Analog Solution Conformation Determined by NOESY NMR .....      | S15 |
| Isomeric breitfussin A analogs .....                                          | S17 |
| Chemical Shift Analysis of Isomeric Breitfussin A Analogs .....               | S18 |
| Singular Value Decomposition (SVD) Analysis of Breitfussin A Analog .....     | S20 |
| DFT Geometry Optimizations and NMR Calculations .....                         | S21 |
| DFT Structures of the Ten Isomeric Breitfussin A Analogs .....                | S31 |
| Chemical Shielding Tensors of the ten isomeric breitfussin A structures ..... | S51 |
| Isomer 1 (conformer 1) .....                                                  | S51 |
| Isomer 1 (conformer 2) .....                                                  | S54 |
| Isomer 1 (conformer 3) .....                                                  | S57 |
| Isomer 1 (conformer 4) .....                                                  | S60 |
| Isomer 2 (conformer 1) .....                                                  | S63 |
| Isomer 2 (conformer 2) .....                                                  | S66 |
| Isomer 2 (conformer 3) .....                                                  | S69 |
| Isomer 2 (conformer 4) .....                                                  | S72 |
| Isomer 3 (conformer 1) .....                                                  | S75 |

|                              |      |
|------------------------------|------|
| Isomer 3 (conformer 2).....  | S78  |
| Isomer 3 (conformer 3).....  | S81  |
| Isomer 3 (conformer 4).....  | S84  |
| Isomer 4 (conformer 1).....  | S87  |
| Isomer 4 (conformer 2).....  | S90  |
| Isomer 4 (conformer 3).....  | S93  |
| Isomer 4 (conformer 4).....  | S96  |
| Isomer 5 (conformer 1).....  | S99  |
| Isomer 5 (conformer 2).....  | S102 |
| Isomer 5 (conformer 3).....  | S105 |
| Isomer 5 (conformer 4).....  | S108 |
| Isomer 6 (conformer 1).....  | S111 |
| Isomer 6 (conformer 2).....  | S114 |
| Isomer 6 (conformer 3).....  | S117 |
| Isomer 6 (conformer 4).....  | S120 |
| Isomer 7 (conformer 1).....  | S123 |
| Isomer 7 (conformer 2).....  | S126 |
| Isomer 7 (conformer 3).....  | S129 |
| Isomer 7 (conformer 4).....  | S132 |
| Isomer 8 (conformer 1).....  | S135 |
| Isomer 8 (conformer 2).....  | S138 |
| Isomer 8 (conformer 3).....  | S141 |
| Isomer 8 (conformer 4).....  | S144 |
| Isomer 9 (conformer 1).....  | S147 |
| Isomer 9 (conformer 2).....  | S150 |
| Isomer 9 (conformer 3).....  | S153 |
| Isomer 9 (conformer 4).....  | S156 |
| Isomer 10 (conformer 1)..... | S159 |
| Isomer 10 (conformer 2)..... | S162 |
| Isomer 10 (conformer 3)..... | S165 |
| Isomer 10 (conformer 4)..... | S168 |
| References .....             | S171 |

## List of Figures

|                                                                                                                                                                                                                                                                                                                                                                                                                                                                                        |     |
|----------------------------------------------------------------------------------------------------------------------------------------------------------------------------------------------------------------------------------------------------------------------------------------------------------------------------------------------------------------------------------------------------------------------------------------------------------------------------------------|-----|
| <b>Figure S1.</b> Structures of breitfussin A (4'-iodo analog), breitfussin B (desiodo-5''-bromo analog) and cephalandole A.....                                                                                                                                                                                                                                                                                                                                                       | S5  |
| <b>Figure S2.</b> 600 MHz <sup>1</sup> H NMR spectrum of breitfussin A acquired with a 12,019 Hz spectral width and 24,034 t1 points and a total of 16 scans. Numbering scheme are shown inset.....                                                                                                                                                                                                                                                                                    | S6  |
| <b>Figure S3:</b> 150 MHz <sup>13</sup> C NMR spectrum of breitfussin A acquired with a 39,682 Hz spectral width, 131,072 t1 points and a total of 1,024 scans. See inset <b>Figure S2</b> for numbering scheme.....                                                                                                                                                                                                                                                                   | S7  |
| <b>Figure S4:</b> COSY spectrum showing correlations between vicinal protons of breitfussin A. See inset <b>Figure S2</b> for numbering scheme.....                                                                                                                                                                                                                                                                                                                                    | S7  |
| <b>Figure S5:</b> HSQC spectrum of breitfussin A showing protonated carbon resonance correlations. Since all protonated carbons in the molecule were methine resonances, multiplicity-editing was not employed. See inset <b>Figure S2</b> for numbering scheme.....                                                                                                                                                                                                                   | S8  |
| <b>Figure S6:</b> HMBC spectrum of breitfussin A analog optimized for 8 Hz. Pivotal correlation to the iodo-bearing carbon, C12, is too weak to be considered real a real correlation in the spectrum. See inset <b>Figure S2</b> for numbering scheme.....                                                                                                                                                                                                                            | S8  |
| <b>Figure S7:</b> <i>J</i> -Modulated HSQC spectrum acquired with 4,795 *10,107 Hz F2*F1 spectral width (1558*1000 t2*t1 points) in the 4.2 mm end of the stretching device. <sup>3</sup> <sup>1</sup> J <sub>CH</sub> values are measured as peak splitting in the indirect F1 dimension. <sup>1</sup> H and <sup>13</sup> C NMR spectra are shown as horizontal and vertical traces. See inset <b>Figure S2</b> for numbering scheme.....                                            | S10 |
| <b>Figure S8:</b> <i>J</i> -Modulated HSQC spectrum acquired with 3,000*10,560 Hz F2*F1 spectral width (748*1000 t2*t1 points) in the 3.0 mm end of the stretching device. <sup>3</sup> <sup>1</sup> J <sub>CH</sub> values are measured as peak splitting in the indirect F1 dimension. <sup>1</sup> H and <sup>13</sup> C NMR spectra are shown as horizontal and vertical traces. See inset <b>Figure S2</b> for numbering scheme.....                                              | S11 |
| <b>Figure S9:</b> Isotropic <sup>13</sup> C NMR experiment acquired with 36,232 Hz spectral width, 144,912 t1 points and a total of 9,351 scans. See inset <b>Figure S2</b> for numbering scheme.....                                                                                                                                                                                                                                                                                  | S12 |
| <b>Figure S10:</b> Anisotropic <sup>13</sup> C NMR experiment acquired with 36,232 Hz spectral width, 144,912 t1 points and a total of 14,198 scans. See inset <b>Figure S2</b> for numbering scheme.....                                                                                                                                                                                                                                                                              | S13 |
| <b>Figure S11.</b> 1D selective ROESY experiment showing (inset), the two breitfussin A conformers whose relative populations were determined utilizing PANIC <sup>3</sup> corrected NOEs; H6 – H20 (6.15) and referenced to H6 – H1 (48.84). Signals from impurities are indicated with *.....                                                                                                                                                                                        | S15 |
| <b>Figure S12.</b> Ten possible isomeric breitfussin A analogs, based on the positional isomerism of the central ring (indicated with green circles), investigated in this work.....                                                                                                                                                                                                                                                                                                   | S17 |
| <b>Figure S13.</b> Bar charts of absolute errors of DFT-derived chemical shift values for the non-halogenated carbons, compared to experimentally measured data for isomeric structures <b>1, 2, 3, 4, 5, 6, 7, 8, 9</b> and <b>10</b> (see Figure S12). The Mean Absolute Error (MAE) of <sup>13</sup> C chemical shift is 1.91, 3.83, 2.95, 4.21, 3.53, 3.46, 6.70, 4.33, 4.05 and 4.73 ppm, respectively, <b>1, 2, 3, 4, 5, 6, 7, 8, 9</b> and <b>10</b> breitfussin A isomers..... | S19 |
| <b>Figure S14.</b> Top and side views of the four conformers of isomeric breitfussin A structures, <b>1-2</b> .....                                                                                                                                                                                                                                                                                                                                                                    | S28 |
| <b>Figure S15.</b> Top and side views of the four conformers of isomeric breitfussin A structures, <b>3-4</b> .....                                                                                                                                                                                                                                                                                                                                                                    | S29 |

## List of Tables

|                                                                                                                                                                                                                                                                                                                                                                               |     |
|-------------------------------------------------------------------------------------------------------------------------------------------------------------------------------------------------------------------------------------------------------------------------------------------------------------------------------------------------------------------------------|-----|
| <b>Table S1:</b> RDCs, RCSAs and Residual Quadrupolar Coupling (RQC) measured for breifussin A acquired in the poly-HEMA/MMA gel with a 0.02 % cross-linking ratio, utilizing the stretching device (4.2/3.0 mm tube). <sup>3</sup> See corresponding atom numbering inset <b>Figure S9</b> (parenthetical carbon resonance number see structure in <b>Figure S1</b> ). ..... | S14 |
| <b>Table S2.</b> <sup>1</sup> H and <sup>13</sup> C NMR chemical shifts of brieffussin A utilized in this study (parenthetical carbon resonance number see structure in <b>Figure S1</b> ). .....                                                                                                                                                                             | S18 |
| <b>Table S3.</b> Single-tensor SVD analysis (variable weight) of the ten isomeric breifussin A analog, utilizing the traditional method (A) and the modified method (B) as described in the main texts. ...                                                                                                                                                                   | S20 |
| <b>Table S4.</b> The DFT SCF energies of conformers of the isomeric breifussin A analogs calculated with the M06-2X functional and the TZP-DKH basis set for I and Br and the 6-31+G(d,p) for the other elements. ....                                                                                                                                                        | S27 |
| <b>Table S5.</b> Absolute value of biaryl dihedral angle between the oxazole and indole ring (degree of planarity estimate) for the different conformations of <b>1-4</b> . (See <b>Figure S14</b> and <b>Figure S15</b> above).....                                                                                                                                          | S30 |

## Structures of two Breitfussin Analogs, Cephalandole A and Flavonol

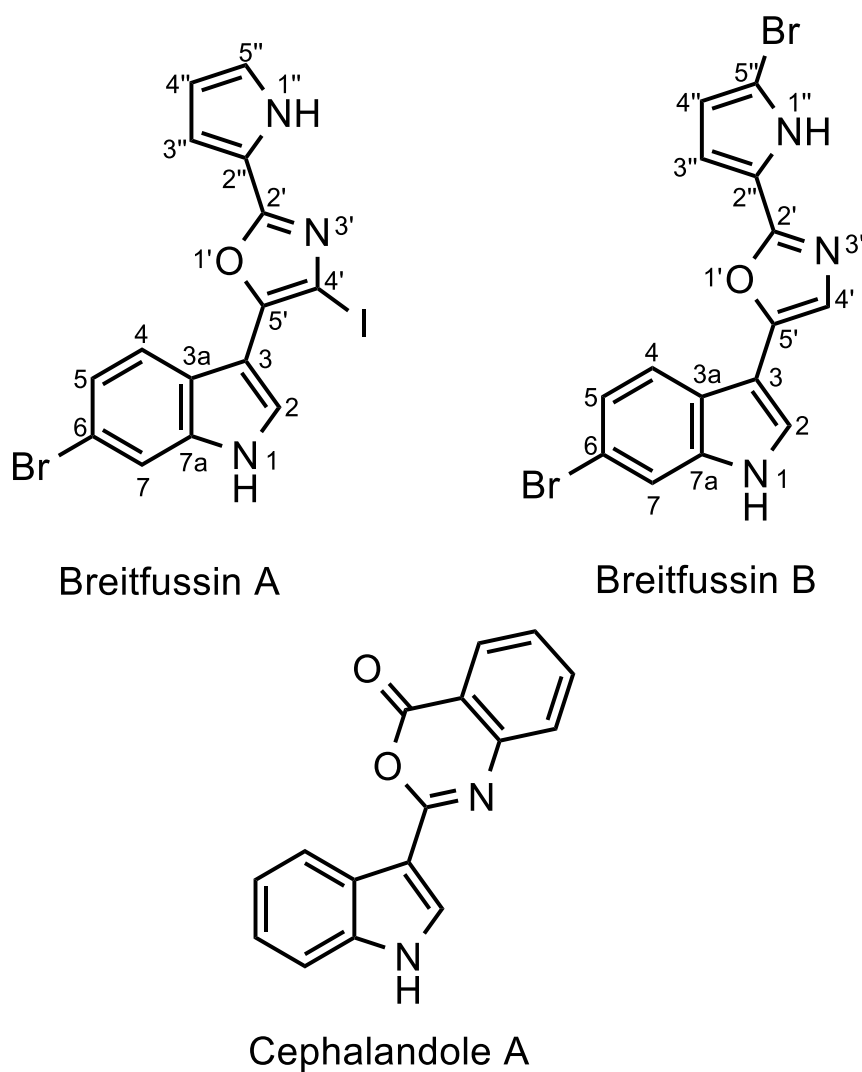

**Figure S1.** Structures of breitfussin A (4'-iodo analog), breitfussin B (desiido-5''-bromo analog) and cephalandole A.

## Experimental

2 mg of the breitfussin A analog sample was dissolved in 170  $\mu\text{L}$   $\text{DMSO-}d_6$  solvent and following suite of experiments acquired on the sample:  $^1\text{H}$  NMR experiment (12,019 Hz spectral width, 24,034 t1 points and 16 total scans);  $^{13}\text{C}$  NMR experiment (29,762 Hz spectral width, 65,536 t1 points and 4096 total scans); COSY experiment (9014\*8998 F1\*F2 spectral width, 2048\*256 t2\*t1 points) with a total of 8 scans; HSQC experiment (9615\*30171 F1\*F2 spectral width, 2048\*256 t2\*t1 points) with a total of 48 scans; and an HMBC experiment optimized for 8 Hz (9615\*30171 F1\*F2 spectral width, 4096\*256 t2\*t1 points) with a total of 48 scans. All experiments were acquired with a Bruker Avance III 600 MHz spectrometer equipped with a 5 mm TXI cryogenic probe at a probe temperature of 25  $^\circ\text{C}$ .

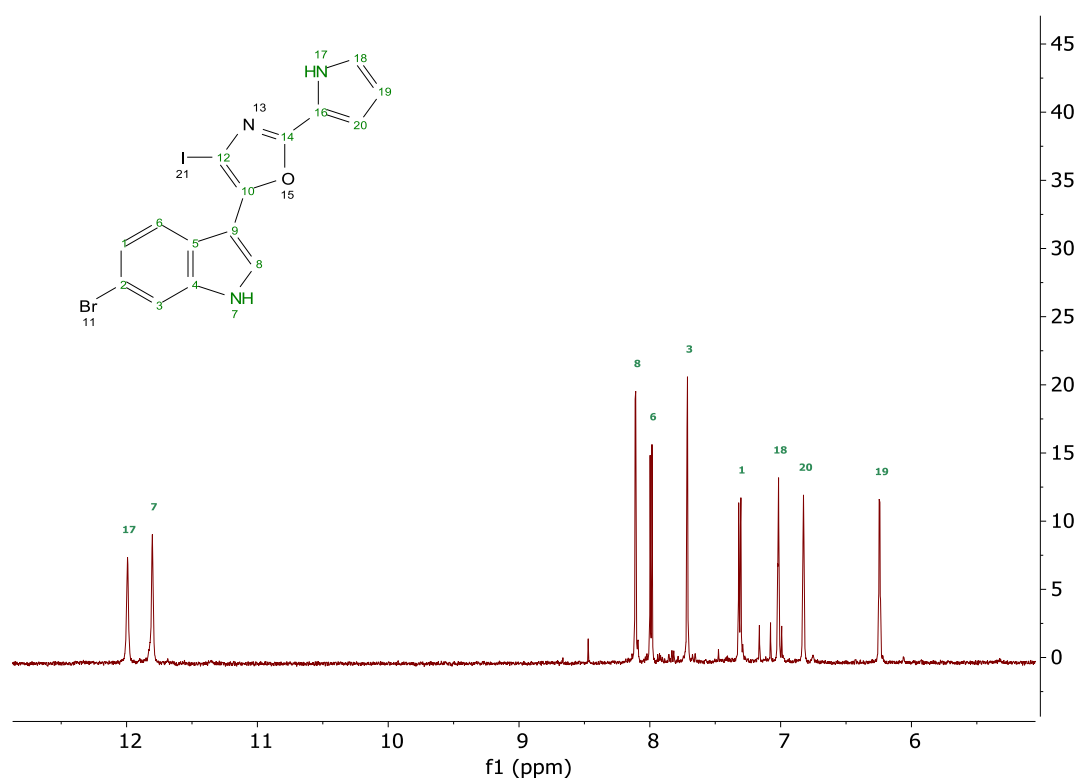

**Figure S2.** 600 MHz  $^1\text{H}$  NMR spectrum of breitfussin A acquired with a 12,019 Hz spectral width and 24,034 t1 points and a total of 16 scans. Numbering scheme are shown inset.

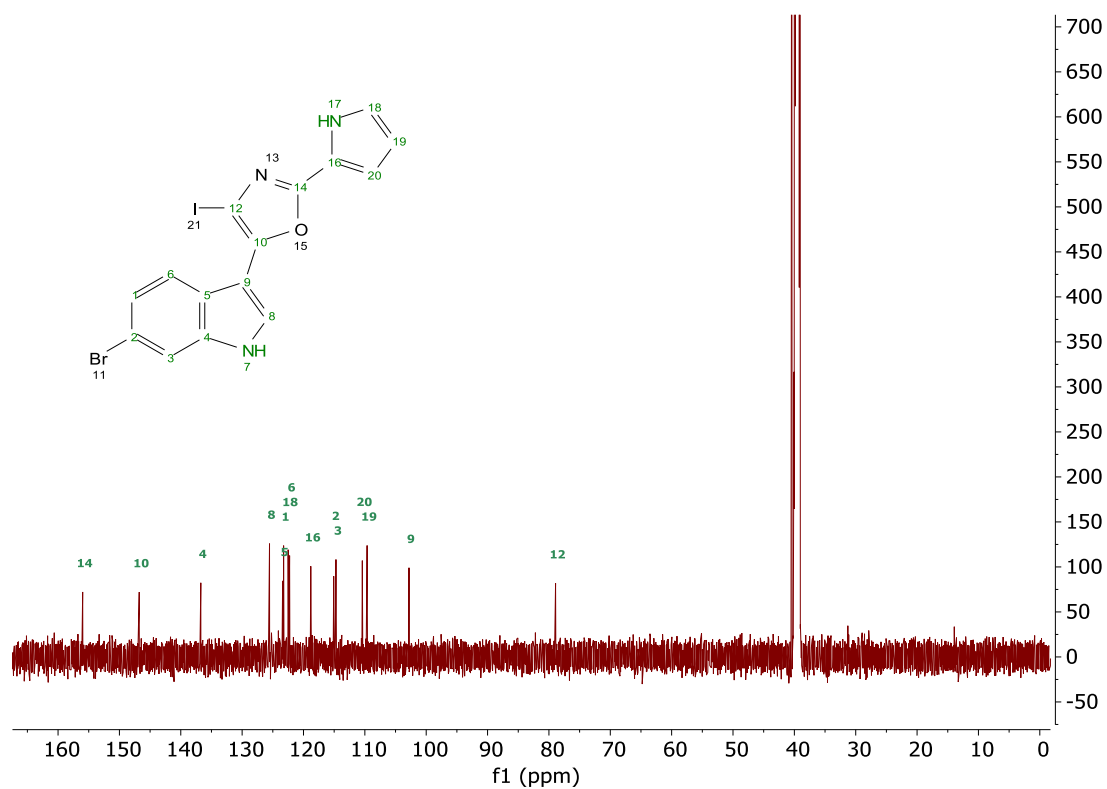

**Figure S3:** 150 MHz <sup>13</sup>C NMR spectrum of breitfussin A acquired with a 39,682 Hz spectral width, 131,072 t1 points and a total of 1,024 scans. See inset **Figure S2** for numbering scheme.

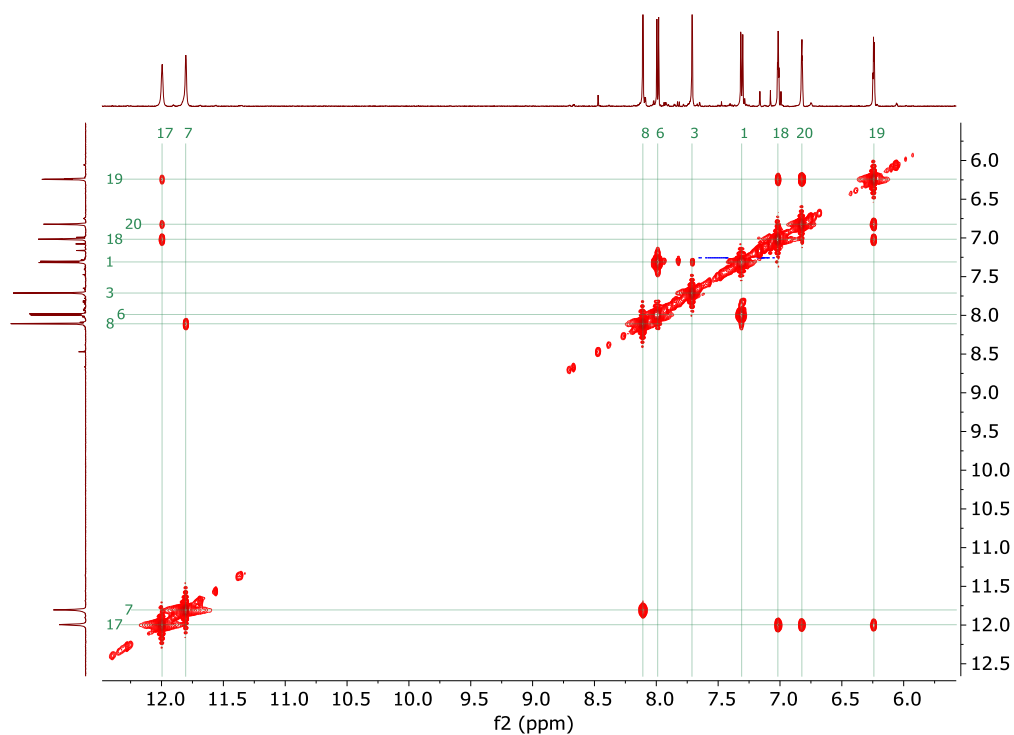

**Figure S4:** COSY spectrum showing correlations between vicinal protons of breitfussin A. See inset **Figure S2** for numbering scheme.

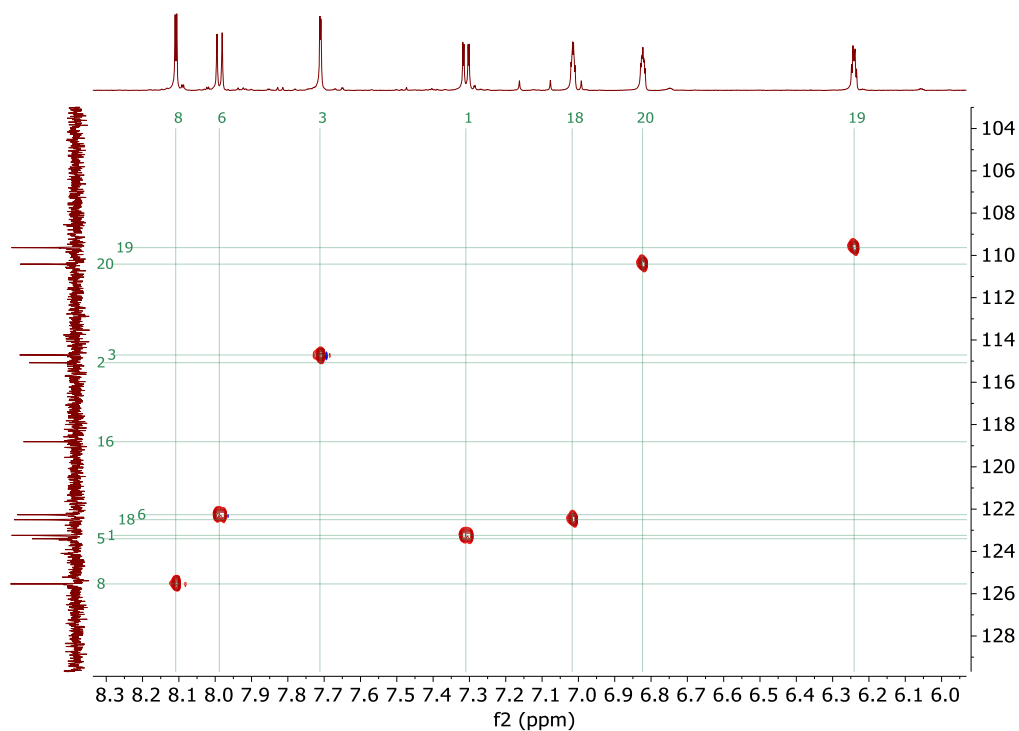

**Figure S5:** HSQC spectrum of breifussin A showing protonated carbon resonance correlations. Since all protonated carbons in the molecule were methine resonances, multiplicity-editing was not employed. See inset **Figure S2** for numbering scheme.

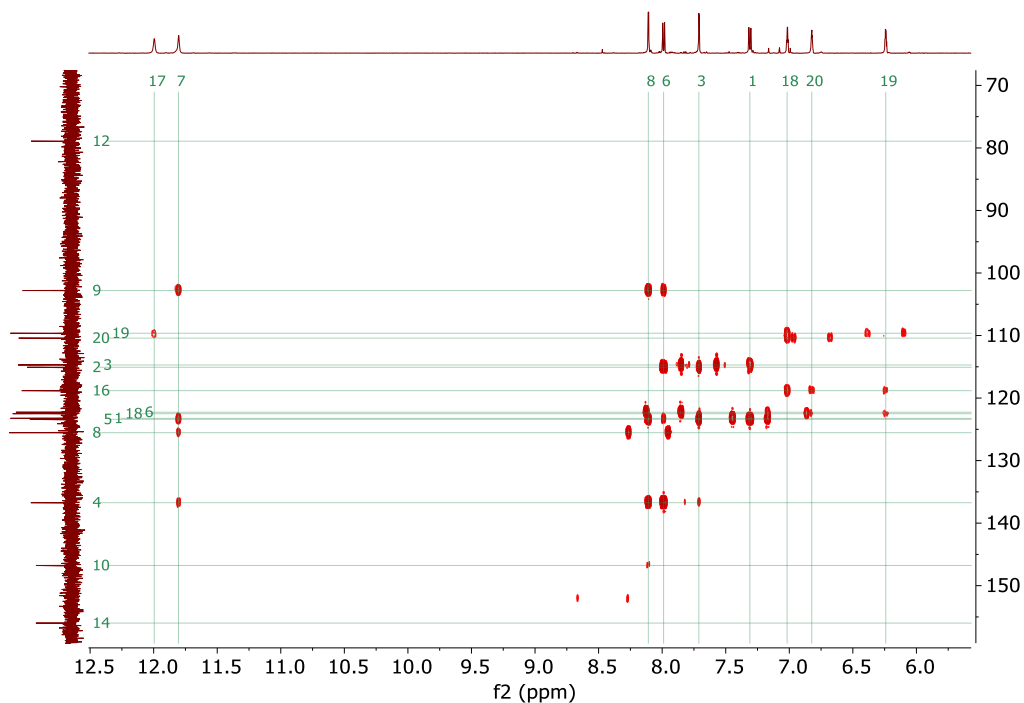

**Figure S6:** HMBC spectrum of breifussin A analog optimized for 8 Hz. Pivotal correlation to the iodo-bearing carbon, C12, is too weak to be considered a real correlation in the spectrum. See inset **Figure S2** for numbering scheme.



## Poly-HEMA/MMA Co-polymer Gel Preparation

In this work, we adopted an in-house developed dimethyl sulfoxide (DMSO) compatible co-polymer gel of 2-hydroxyethyl methacrylate(HEMA) and methyl methacrylate (MMA) at 0.02% cross-linking ratio, that is a modification of the poly-HEMA gel first reported by Gil, *et al.*<sup>1</sup> This gel will be referred to as the poly-HEMA/MMA gel. The poly-HEMA/MMA gel consists of 35% HEMA (v/v), 35% MMA (v/v) and 30% methanol (v/v). The 0.02% gel cross-linking ratio was achieved with the addition of 20  $\mu$ L per ml of a 1% ethylene glycol dimethacrylate (EDGMA) solution (prepared in MMA). 10  $\mu$ L per ml of 6% V-70 (2,2'-azobis(2,4-dimethyl-4-methoxyvaleronitrile)) solution in acetone is added as the polymerization initiator (NOTE: HEMA, MMA and EDGMA reagents were filtered through basic alumina to remove polymerization inhibitors prior to use). The gel solution was properly mixed by vortexing to ensure homogeneity after which a very slow stream of nitrogen gas (to avoid spilling) was bubbled through the mixtures for a few seconds. The gel solution was then transferred into a 1/8" ID FEP (fluorinated ethylene propylene) tubing (Cole-Parmer catalog no.: EW-06450-05) – cut into 30 cm segments with one end sealed with a micro-stopper – using glass pipettes. The open end was then sealed with a micro-stopper and the gel was allowed to polymerize overnight in the oven at 50° C. The polymerized gel was then cut into 2.3 cm segments while inside the FEP tubing after which the cut gels were cured in the oven at 65° C for ~ 5hrs. The gels can now be easily pushed out from the FEP tubing. The cured gels are further cut into 2 cm gel sticks. The gels are washed by transferring into a glass vial filled with methanol and allowed to sit in the solvent for at least 4 hrs. The washing step is repeated 4 to 5 times by decanting the used solvent and replacing with fresh solvent. The washed gels are then dried on a glass surface inside the hood overnight, after which they were ready for use.

## Gel sample preparation and data acquisition

Approximately 2 mg of breitfussin A was dissolved in 330  $\mu$ L of DMSO-*d*<sub>6</sub> contained in a 4 ml vial with 5  $\mu$ L of TMS added as reference. The pre-washed poly-HEMA/MMA gel (0.02 % cross-linking) gel stick was introduced into the vial containing the solution and allowed to incubate and equilibrate for two (2) days. Anisotropic NMR data, including *J*-modulated HSQC and <sup>13</sup>C NMR, were acquired utilizing a 4.2/3.0 mm stretching device (denoted here as isotropic and anisotropic ends, respectively) as described in the report by Liu, *et al.*<sup>2</sup> The “isotropic” *J*-modulated HSQC experiment (**Figure S7**) – gel in the 4.2 mm end – was acquired with a 4,795 \*10,107 Hz F2\*F1 spectral width and 1558\*1000 t2\*t1 points at 8 scans per increment. The “anisotropic” *J*-modulated HSQC experiment (**Figure S8**) – gel stretched in the 3.0 mm end – was acquired with a 3,000\*10,560 Hz F2\*F1 spectral width and 748\*1000 t2\*t1 points at 4 scans per increment. In the same vein, isotropic and anisotropic <sup>13</sup>C NMR experiments were acquired with 36,232 Hz spectral width, 144,912 t1 points and a total of 9,351 scans

(isotropic data) or 14,198 scans (anisotropic). Residual Dipolar Coupling (RDC) is the difference in the coupling constants measured between the two alignment conditions. Residual Chemical Shift Anisotropy (RCSA) is the difference in the chemical shifts between the two alignment conditions. The results obtained are summarized in **Table S1**.

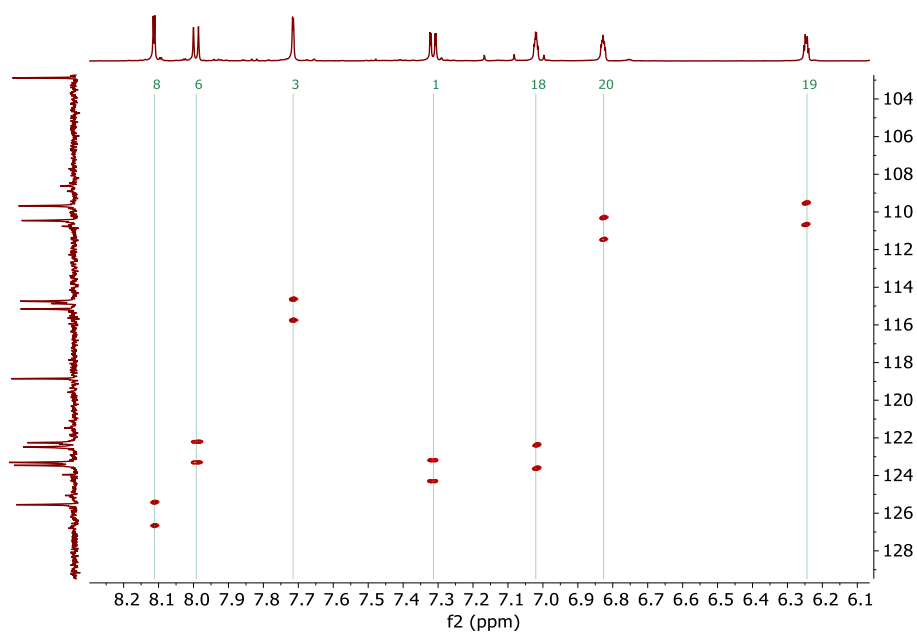

**Figure S7:** *J*-Modulated HSQC spectrum acquired with 4,795 \*10,107 Hz F2\*F1 spectral width (1558\*1000 t2\*t1 points) in the 4.2 mm end of the stretching device.<sup>3</sup> <sup>1</sup>J<sub>CH</sub> values are measured as peak splitting in the indirect F1 dimension. <sup>1</sup>H and <sup>13</sup>C NMR spectra are shown as horizontal and vertical traces. See inset **Figure S2** for numbering scheme.

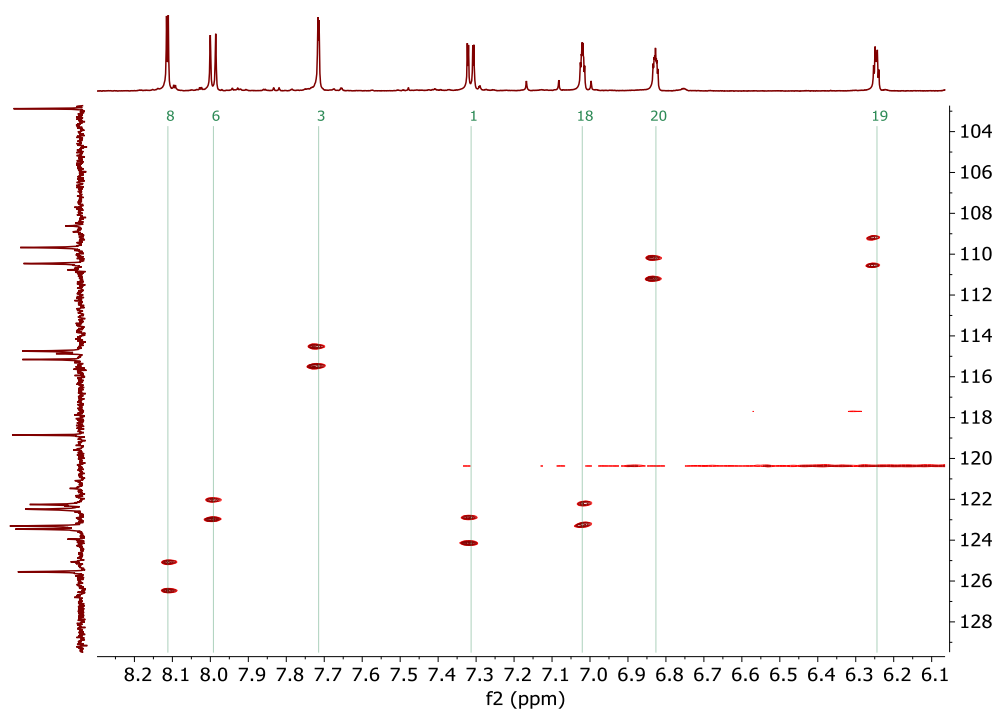

**Figure S8:** *J*-Modulated HSQC spectrum acquired with 3,000\*10,560 Hz F2\*F1 spectral width (748\*1000 t2\*t1 points) in the 3.0 mm end of the stretching device.  $^3J_{CH}$  values are measured as peak splitting in the indirect F1 dimension.  $^1H$  and  $^{13}C$  NMR spectra are shown as horizontal and vertical traces. See inset **Figure S2** for numbering scheme.

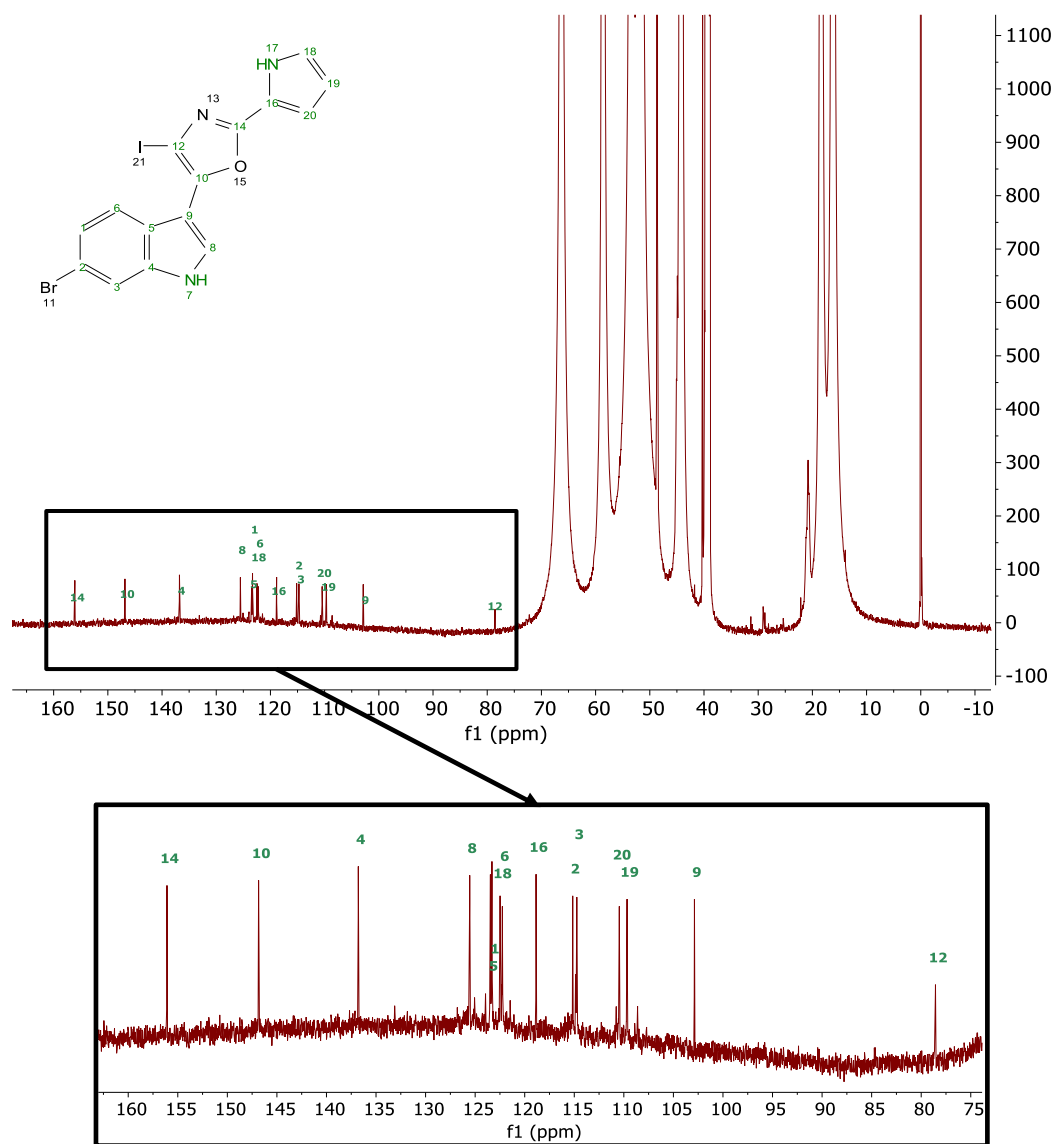

**Figure S9:** Isotropic  $^{13}\text{C}$  NMR experiment acquired with 36,232 Hz spectral width, 144,912 t1 points and a total of 9,351 scans. See inset **Figure S2** for numbering scheme.

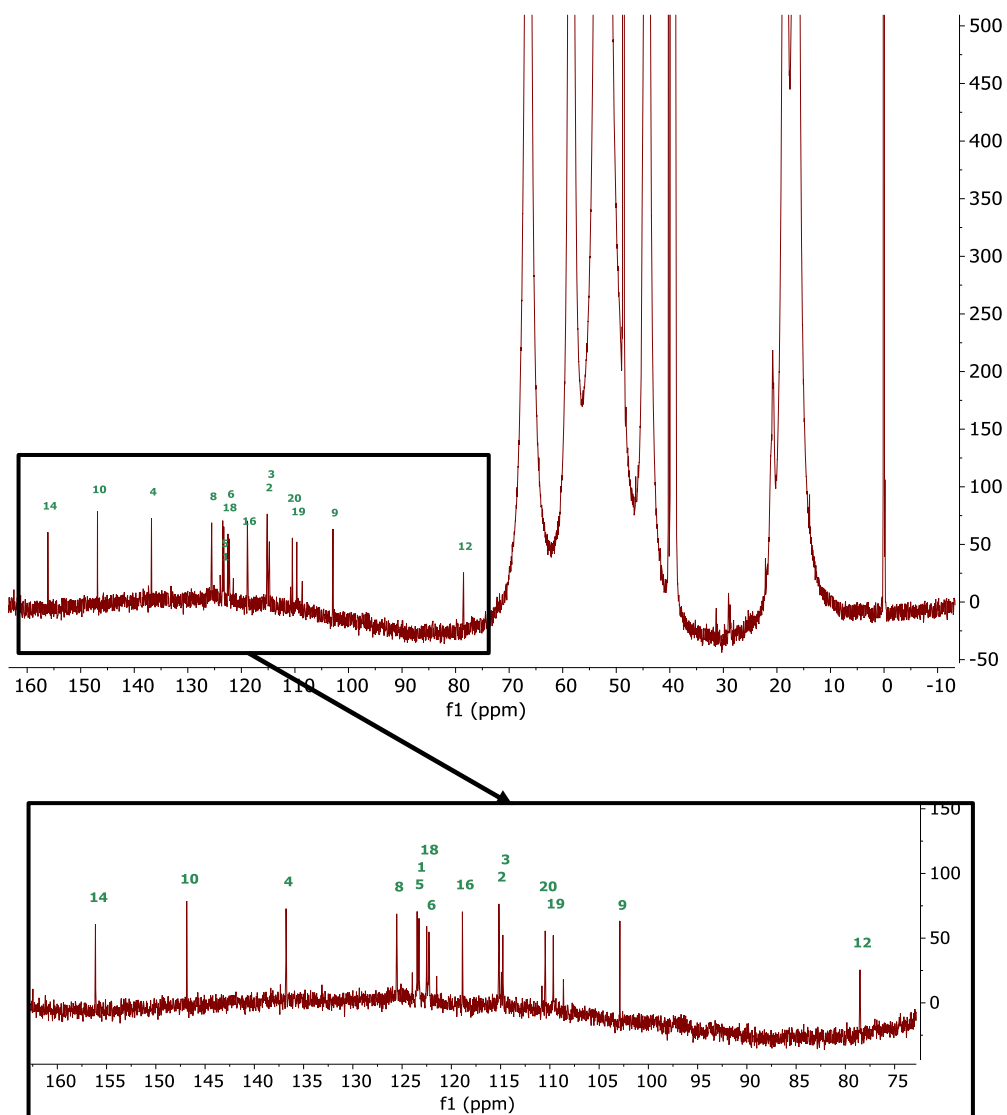

**Figure S10:** Anisotropic  $^{13}\text{C}$  NMR experiment acquired with 36,232 Hz spectral width, 144,912 t1 points and a total of 14,198 scans. See inset **Figure S2** for numbering scheme.

**Table S1:** RDCs, RCSAs and Residual Quadrupolar Coupling (RQC) measured for breitfussin A acquired in the poly-HEMA/MMA gel with a 0.02 % cross-linking ratio, utilizing the stretching device (4.2/3.0 mm tube).<sup>3</sup> See corresponding atom numbering inset **Figure S9** (parenthetical carbon resonance number see structure in **Figure S1**).

| Atom*                                                                | No. of Protons | RDC (Hz) | RCSA (Hz) |
|----------------------------------------------------------------------|----------------|----------|-----------|
| 1 (C5)                                                               | 1              | 25.01    | -3.4      |
| 2 (C6)                                                               | -              | -        | 2.3       |
| 3 (C7)                                                               | 1              | -24.53   | 4.5       |
| 4 (C7a)                                                              | -              | -        | -1.1      |
| 5 (C3a)                                                              | -              | -        | 2.1       |
| 6 (C4)                                                               | 1              | -22.58   | 3.0       |
| 8 (C2)                                                               | 1              | 23.69    | -0.2      |
| 9 (C3)                                                               | -              | -        | 2.4       |
| 10 (C5')                                                             | -              | -        | 2.5       |
| 12 (C4')                                                             | -              | -        | -6.5      |
| 14 (C2')                                                             | -              | -        | 6.1       |
| 16 (C2'')                                                            | -              | -        | 3.3       |
| 18 (C5'')                                                            | 1              | -29.02   | 2.6       |
| 19 (C4'')                                                            | 1              | 31.28    | -3.2      |
| 20 (C3'')                                                            | 1              | -17.83   | 2.5       |
| RQC                                                                  |                | 14.4     |           |
| *DFT atom numbering for Breitfussin A analog structure <b>1</b> used |                |          |           |

## Breitfussin A Analog Solution Conformation Determined by NOESY NMR

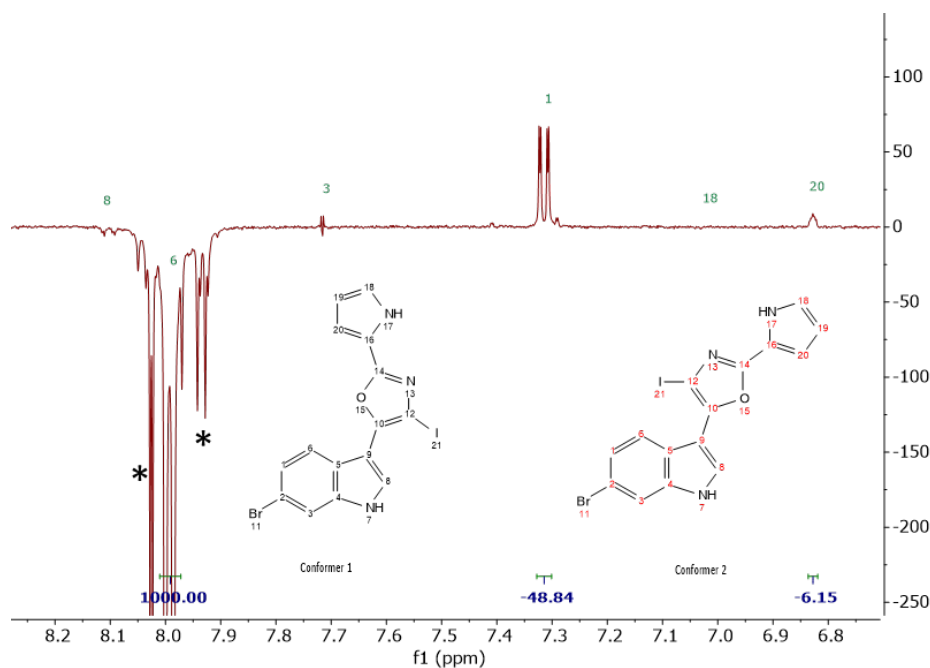

**Figure S11.** 1D selective ROESY experiment showing (inset), the two breitfussin A conformers whose relative populations were determined utilizing PANIC<sup>2</sup> corrected NOEs; H6 – H20 (6.15) and referenced to H6 – H1 (48.84). Signals from impurities are indicated with \*.

The solution conformer population of the breitfussin analog was determined from ROESY data as shown below:

$$\frac{k}{r_{conf1}^6} + \frac{(1-k)}{r_{conf2}^6} = \frac{1}{r_{obs}^6}$$

Where  $k$  corresponds to the population of conformer 1. Solving for  $k$ ,

$$k = \frac{(r_{conf1}^6 * r_{conf2}^6) - (r_{conf1}^6 * r_{obs}^6)}{r_{obs}^6 * (r_{conf2}^6 - r_{conf1}^6)}$$

The measured distances between H6 – H20 utilizing Density Functional Theory (DFT) geometries for conformers 1 and 2 are giving,

$$r_{conf1} = 3.1 \text{ \AA} \text{ and } r_{conf2} = 6.9 \text{ \AA}$$

The calculated distance,  $r_{obs}$ , is given by

$$r_{obs} = r_{ref} * \left[ \frac{ROE_{obs}}{ROE_{ref}} \right]^{\frac{1}{6}}$$

Using the H1-H6 ROE signal as the reference,

$$r_{ref} = 2.5 \text{ \AA}, ROE_{ref} = 48.84, ROE_{obs} = 6.15$$

$$r_{obs} = 3.567 \text{ \AA}$$

Thus, substituting the values into:

$$k = \frac{(r_{conf1}^6 * r_{conf2}^6) - (r_{conf1}^6 * r_{obs}^6)}{r_{obs}^6 * (r_{conf2}^6 - r_{conf1}^6)}$$

The ROE derived population of conformer 1 is,

$$k = 0.454 \text{ or } 45.4 \%$$



## Isomeric breitfussin A analogs

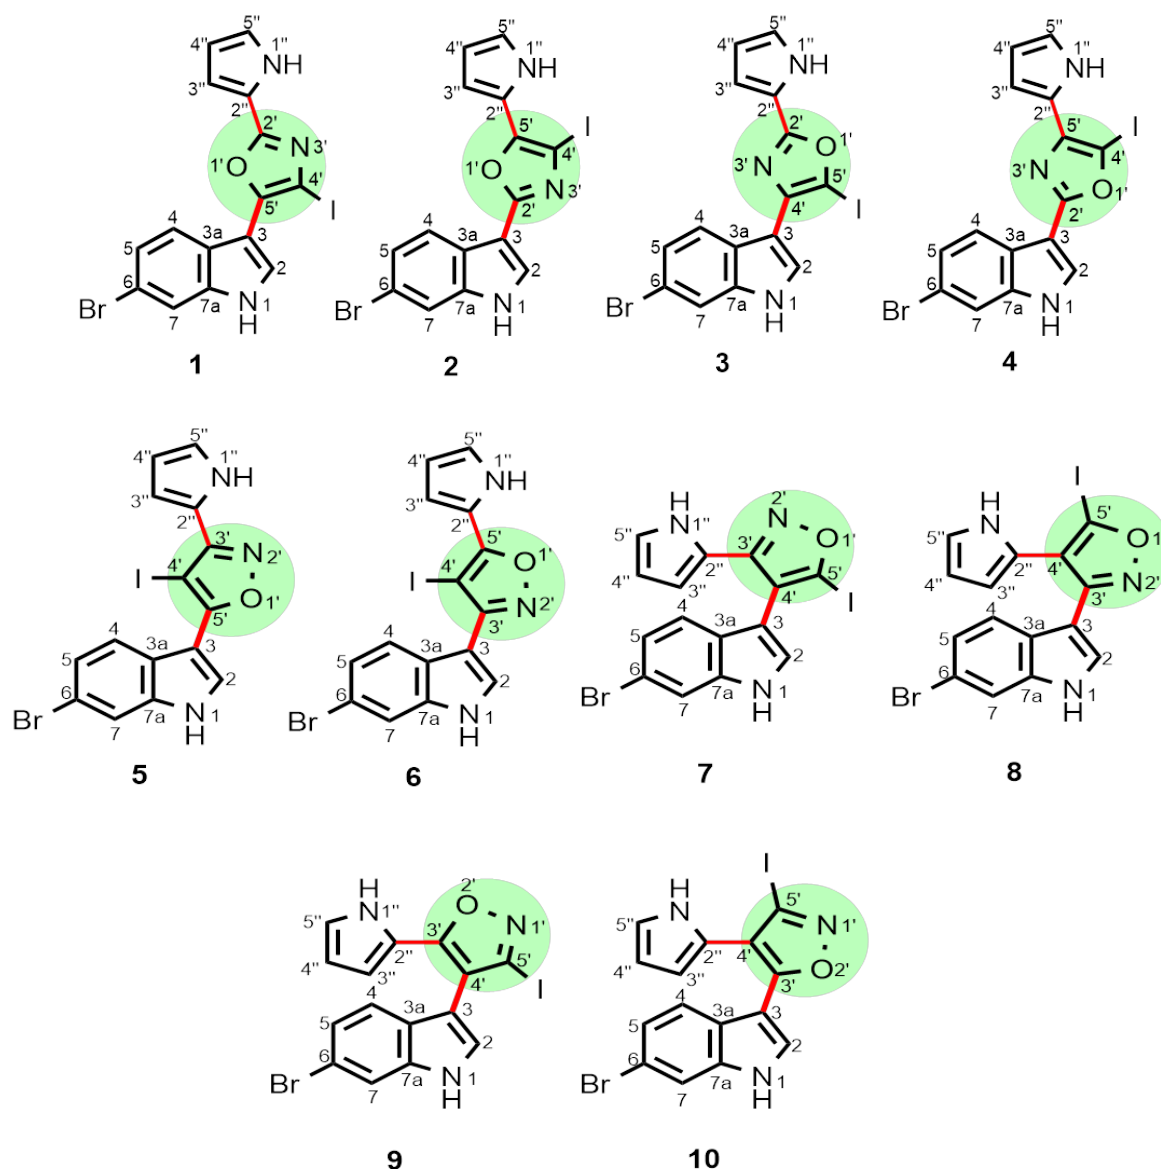

**Figure S12.** Ten possible isomeric breitfussin A analogs, based on the positional isomerism of the central ring (indicated with green circles), investigated in this work.

The ten isomeric breitfussin A analogs analysed in this work – involving the positional isomerism of the central oxazole or isoxazole ring – are shown in **Figure S12**. Four conformers were determined for each isomer, resulting from free rotation of the single bonds highlighted in red. The conformers generated preferentially adopt planar structures, in most cases after DFT optimization, with only a few off-plane stable conformations.

## Chemical Shift Analysis of Isomeric Breiffussin A Analogs

Plots of chemical shift absolute errors of the non-halogenated carbons of ten isomeric breiffussin A analog are shown in **Figure S13**. Chemical shift values for the ten isomers were calculated by DFT methods using the model chemistry described in the section “DFT Geometry Optimizations and NMR Chemical Shift Calculations” (page S15). The theoretically determined chemical shift values were compared to experimentally measured values, which are tabulated in Table S2 below. The Mean Absolute Errors (MAE) were determined as 1.91, 3.83, 2.95, 4.21, 3.53, 3.46, 6.70, 4.33, 4.05 and 4.73 ppm, respectively, for isomers **1, 2, 3, 4, 5, 6, 7, 8, 9** and **10** (**Figure S13**). Although the MAE values favour the correct stereo-isomer, **1**, unequivocal isomeric differentiation is not feasible – especially to isomer **3** – due to inherent errors from theoretical calculations.

**Table S2.**  $^1\text{H}$  and  $^{13}\text{C}$  NMR chemical shifts of breiffussin A utilized in this study (parenthetical carbon resonance number see structure in **Figure S1**).

| Chemical Shift Values (ppm) |                              |                                 |
|-----------------------------|------------------------------|---------------------------------|
| DFT Atom numbering (*)      | $^1\text{H}$ Chemical shifts | $^{13}\text{C}$ Chemical shifts |
| 1 (C5)                      | 7.31                         | 123.2                           |
| 2 (C6)                      | -                            | 115.1                           |
| 3 (C7)                      | 7.71                         | 114.7                           |
| 4 (C7a)                     | -                            | 136.7                           |
| 5 (C3a)                     | -                            | 123.4                           |
| 6 (C4)                      | 7.99                         | 122.3                           |
| 8 (C2)                      | 8.11                         | 125.5                           |
| 9 (C3)                      | -                            | 102.8                           |
| 10 (C5')                    | -                            | 146.8                           |
| 12 (C4')                    | -                            | 78.9                            |
| 14 (C2')                    | -                            | 156.0                           |
| 16 (C2'')                   | -                            | 118.8                           |
| 18 (C5'')                   | 7.02                         | 122.5                           |
| 19 (C4'')                   | 6.24                         | 109.6                           |
| 20 (C3'')                   | 6.82                         | 110.4                           |

\* Standardized carbon numbering as shown in **Figure S12**.

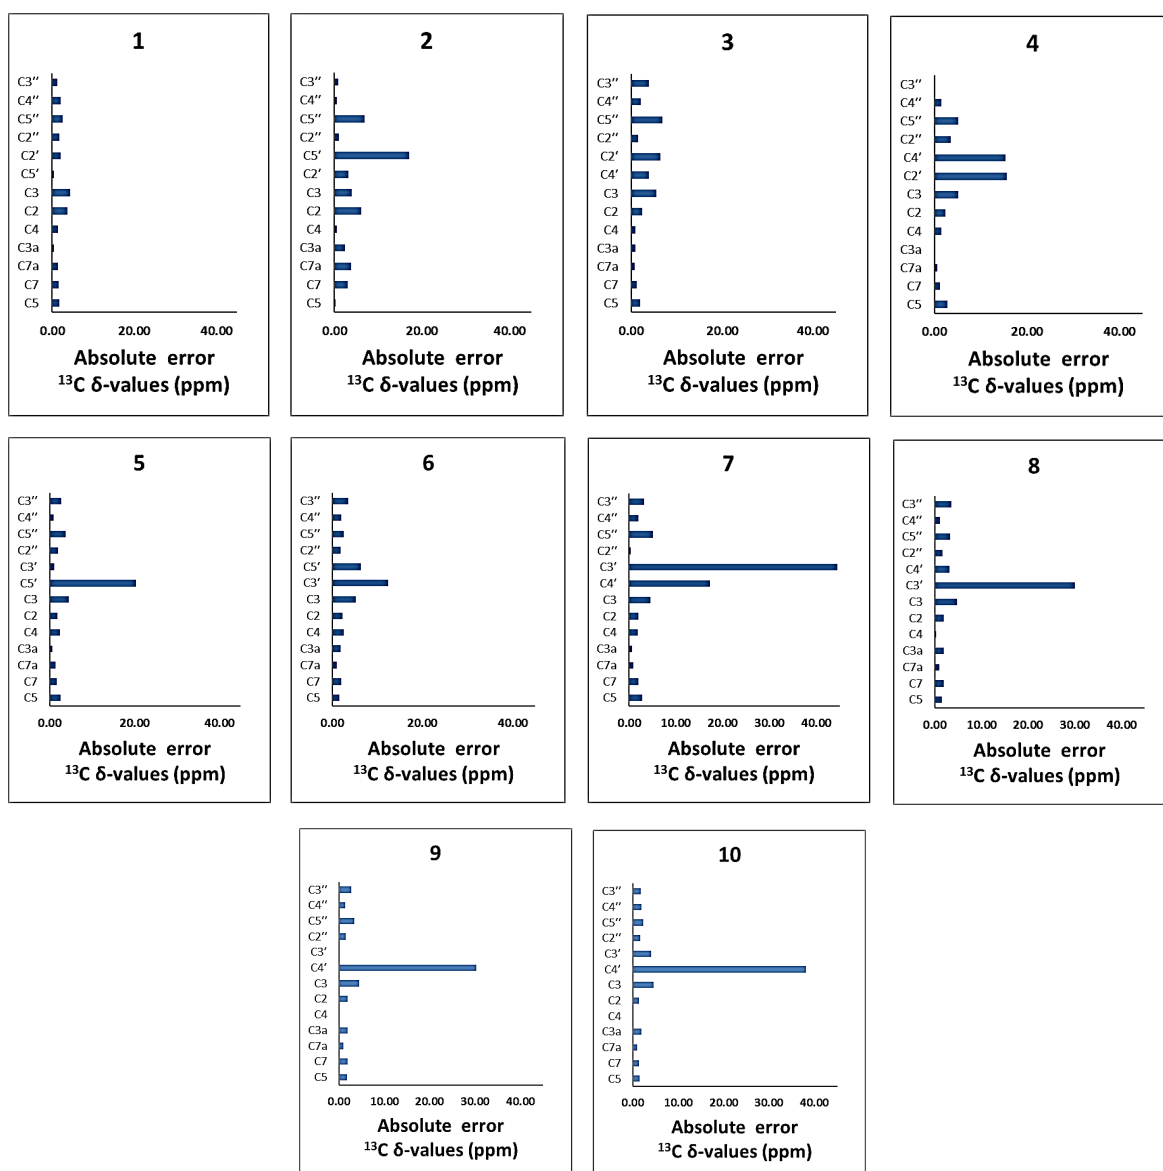

**Figure S13.** Bar charts of absolute errors of DFT-derived chemical shift values for the non-halogenated carbons, compared to experimentally measured data for isomeric structures **1**, **2**, **3**, **4**, **5**, **6**, **7**, **8**, **9** and **10** (see Figure S12). The Mean Absolute Error (MAE) of  $^{13}\text{C}$  chemical shift is 1.91, 3.83, 2.95, 4.21, 3.53, 3.46, 6.70, 4.33, 4.05 and 4.73 ppm, respectively, **1**, **2**, **3**, **4**, **5**, **6**, **7**, **8**, **9** and **10** breitfussin A isomers.

## Singular Value Decomposition (SVD) Analysis of Breitfussin A Analog

SVD analysis of the ten isomeric breitfussin structures cannot be unequivocally differentiated via the traditional approach that requires the computation of five free variables (Method A in **Table S3**). Isomers **1**, **2**, **4** and **7** yield low Q-values, which does not exclude the incorrect diastereomers as plausible structure for the breitfussin A analog investigated. On the other hand, enforcing additional constraints based on the planarity of the conformations adopted by the breitfussin isomers (Method B, discussed in main text and **Table S3**) allows unambiguous diastereomeric differentiation of the isomers.

**Table S3.** Single-tensor SVD analysis (variable weight) of the ten isomeric breitfussin A analog, utilizing the traditional method (A) and the modified method (B) as described in the main texts.

| <b>Q-factors from SVD analysis</b> |                 |                 |
|------------------------------------|-----------------|-----------------|
| <b>Isomer</b>                      | <b>Method A</b> | <b>Method B</b> |
| <b>1</b>                           | 0.050           | 0.053           |
| <b>2</b>                           | 0.078           | 0.095           |
| <b>3</b>                           | 0.154           | 0.232           |
| <b>4</b>                           | 0.067           | 0.126           |
| <b>5</b>                           | 0.160           | 0.308           |
| <b>6</b>                           | 0.203           | 0.338           |
| <b>7</b>                           | 0.084           | 0.449           |
| <b>8</b>                           | 0.191           | 0.279           |
| <b>9</b>                           | 0.090           | 0.446           |
| <b>10</b>                          | 0.091           | 0.285           |

## DFT Geometry Optimizations and NMR Calculations

All of the DFT calculations were performed using *Gaussian 16*, Revision B.01.5<sup>5</sup> Geometry optimizations and frequency calculations of **1**, **2**, **3**, **4**, **5**, **6**, **7**, **8**, **9** and **10** were performed using the M06-2X functional and the 6-31+G(d,p) basis set for C, H, N, and O, and the TZP-DKH basis set<sup>6,7</sup> for Br and I<sup>8,9</sup> using ‘tight’ geometry convergence criteria, the ‘ultrafine’ integration grid, and the SMD solvation model with DMSO as solvent and the keyword nosymmca. All of the computations were performed in the input orientation through the use of the nosymm keyword. NMR shielding tensors and magnetic susceptibilities were calculated using the GIAO method on the optimized geometries with the mPW1PW91 density functional and the 6-311+G(2d,p) basis set for C, H, N, and O and TZP-DKH basis set for Br and I.

The basis functions utilized for bromine (Br) and iodine (I) (TZP-DKH basis set) are shown below:<sup>5,6</sup>

---

```
Br  0
S  7  1.00
1891721.28453019    0.0019998
299876.69022932    0.0055058
73577.47723328     0.0143340
22821.38425143    0.0343970
8196.66148892     0.0844542
3042.20569848     0.2335931
1114.04711267     0.6257158
S  2  1.00
27.88308617      -0.5952086
12.56697986      -0.4047913
S  1  1.00
416.79690877     1.0000000
S  1  1.00
162.83699705     1.0000000
S  1  1.00
```

|     |               |            |
|-----|---------------|------------|
|     | 60.95282138   | 1.0000000  |
| S 1 | 1.00          |            |
|     | 4.29335357    | 1.0000000  |
| S 1 | 1.00          |            |
|     | 1.86285469    | 1.0000000  |
| S 1 | 1.00          |            |
|     | 0.43306174    | 1.0000000  |
| S 1 | 1.00          |            |
|     | 0.1612887     | 1.0000000  |
| P 7 | 1.00          |            |
|     | 9319.75302208 | 0.0007979  |
|     | 2376.91773965 | 0.0034677  |
|     | 850.05093709  | 0.0139712  |
|     | 333.27682069  | 0.0543097  |
|     | 133.67709985  | 0.1755638  |
|     | 55.61145698   | 0.3693407  |
|     | 24.09110501   | 0.3825488  |
| P 2 | 1.00          |            |
|     | 4.59144998    | -0.5931901 |
|     | 2.01522298    | -0.4068098 |
| P 1 | 1.00          |            |
|     | 10.32325402   | 1.0000000  |
| P 1 | 1.00          |            |
|     | 0.74175022    | 1.0000000  |
| P 1 | 1.00          |            |
|     | 0.29419421    | 1.0000000  |
| P 1 | 1.00          |            |
|     | 0.10541093    | 1.0000000  |

|          |                  |            |
|----------|------------------|------------|
| D 4 1.00 |                  |            |
|          | 168.94701922     | 0.0133602  |
|          | 49.42559982      | 0.0911855  |
|          | 17.8625704       | 0.3148117  |
|          | 7.02094166       | 0.5806425  |
| D 1 1.00 |                  |            |
|          | 2.76152556       | 1.0000000  |
| D 1 1.00 |                  |            |
|          | 1.0146000        | 1.0000000  |
| F 1 1.00 |                  |            |
|          | 10.92125998      | 1.0000000  |
| F 1 1.00 |                  |            |
|          | 3.0839599        | 1.0000000  |
| G 1 1.00 |                  |            |
|          | 8.36545878       | 1.0000000  |
| *****    |                  |            |
| I 0      |                  |            |
| S 8 1.00 |                  |            |
|          | 5464702.08060097 | 0.0022010  |
|          | 849942.52168504  | 0.0059336  |
|          | 207458.86762606  | 0.0137360  |
|          | 64929.86485391   | 0.0289591  |
|          | 23909.80880875   | 0.0599806  |
|          | 9850.71275593    | 0.1154691  |
|          | 4222.34623514    | 0.2554331  |
|          | 1781.76403452    | 0.5182871  |
| S 2 1.00 |                  |            |
|          | 749.21394356     | -0.5544582 |

|     |                |            |
|-----|----------------|------------|
|     | 318.75246448   | -0.4455417 |
| S 2 | 1.00           |            |
|     | 59.88344918    | -0.6579130 |
|     | 29.50227605    | -0.3420869 |
| S 2 | 1.00           |            |
|     | 12.24593624    | -0.6349870 |
|     | 6.20345391     | -0.3650129 |
| S 2 | 1.00           |            |
|     | 2.43764323     | 0.6518901  |
|     | 1.14985168     | 0.3481098  |
| S 1 | 1.00           |            |
|     | 118.02205930   | 1.0000000  |
| S 1 | 1.00           |            |
|     | 0.30638210     | 1.0000000  |
| S 1 | 1.00           |            |
|     | 0.11926836     | 1.0000000  |
| S 1 | 1.00           |            |
|     | 0.05963418     | 1.0000000  |
| P 7 | 1.00           |            |
|     | 20182.20166081 | 0.0016094  |
|     | 4999.21100888  | 0.0059094  |
|     | 1768.53795847  | 0.0204900  |
|     | 734.7752808    | 0.0629189  |
|     | 317.5116541    | 0.1798365  |
|     | 139.60118455   | 0.3605064  |
|     | 63.12833732    | 0.3687292  |
| P 2 | 1.00           |            |
|     | 13.45203045    | -0.6684080 |



|     |              |            |
|-----|--------------|------------|
|     | 6.52579989   | -0.3315919 |
| P 3 | 1.00         |            |
|     | 3.02467901   | 0.6059378  |
|     | 1.38040546   | 0.3385645  |
|     | 0.52669045   | 0.0554975  |
| P 1 | 1.00         |            |
|     | 28.34086632  | 1.0000000  |
| P 1 | 1.00         |            |
|     | 0.22217820   | 1.0000000  |
| P 1 | 1.00         |            |
|     | 0.08328104   | 1.0000000  |
| P 1 | 1.00         |            |
|     | 0.04164052   | 1.0000000  |
| D 6 | 1.00         |            |
|     | 565.9883795  | 0.0066068  |
|     | 168.69681731 | 0.0466142  |
|     | 63.14306896  | 0.1755992  |
|     | 26.1030685   | 0.3583238  |
|     | 11.24530421  | 0.3404563  |
|     | 4.6390732    | 0.0723995  |
| D 1 | 1.00         |            |
|     | 1.91572411   | 1.0000000  |
| D 1 | 1.00         |            |
|     | 0.72024616   | 1.0000000  |
| D 1 | 1.00         |            |
|     | 0.36012308   | 1.0000000  |
| F 1 | 1.00         |            |
|     | 3.85297909   | 1.0000000  |

|   |   |             |           |
|---|---|-------------|-----------|
| F | 1 | 1.00        |           |
|   |   | 1.265860195 | 1.0000000 |
| G | 1 | 1.00        |           |
|   |   | 2.97888999  | 1.0000000 |

---

Other model chemistries explored in geometry optimizations and frequencies (Table 1 in main text) include (1) the B3LYP density functional and the 6-31G\* basis set for C, H, N, O, and Br, and MIDI! for I, and (2) the M06-2X density functional and the 6-31+G\*\* basis set for C, H, N, O, and Br, and DGDZVP for I. Single-point energies incorporating the second-order Douglas-Kroll-Hess relativistic corrections were additionally evaluated using these two model chemistries on the corresponding optimized geometries.

**Table S4.** The DFT SCF energies of conformers of the isomeric breitfussin A analogs calculated with the M06-2X functional and the TZP-DKH basis set for I and Br and the 6-31+G(d,p) for the other elements.

| <b>DFT SCF energies</b> |                    |                    |                    |                    |
|-------------------------|--------------------|--------------------|--------------------|--------------------|
| <b>Isomer</b>           | <b>Conformer 1</b> | <b>Conformer 2</b> | <b>Conformer 3</b> | <b>Conformer 4</b> |
| <b>1</b>                | -10227.3272747     | -10227.3269343     | -10227.3257936     | -10227.3255345     |
| <b>2</b>                | -10227.3280597     | -10227.3266542     | -10227.3280581     | -10227.3292980     |
| <b>3</b>                | -10227.3225896     | -10227.3226754     | -10227.3210185     | -10227.3211404     |
| <b>4</b>                | -10227.3249022     | -10227.3253170     | -10227.3244017     | -10227.3251064     |
| <b>5</b>                | -10227.2863312     | -10227.2854944     | -10227.2857097     | -10227.2851302     |
| <b>6</b>                | -10227.2854817     | -10227.2860022     | -10227.2864821     | -10227.2866630     |
| <b>7</b>                | -10227.2815953     | -10227.2820551     | -10227.2810071     | -10227.2818050     |
| <b>8</b>                | -10227.2783665     | -10227.2776143     | -10227.2784319     | -10227.2776464     |
| <b>9</b>                | -10227.2816221     | -10227.2820903     | -10227.2809589     | -10227.2818283     |
| <b>10</b>               | -10227.2823324     | -10227.2818157     | -10227.2819784     | -10227.2820598     |

## Isomer 1

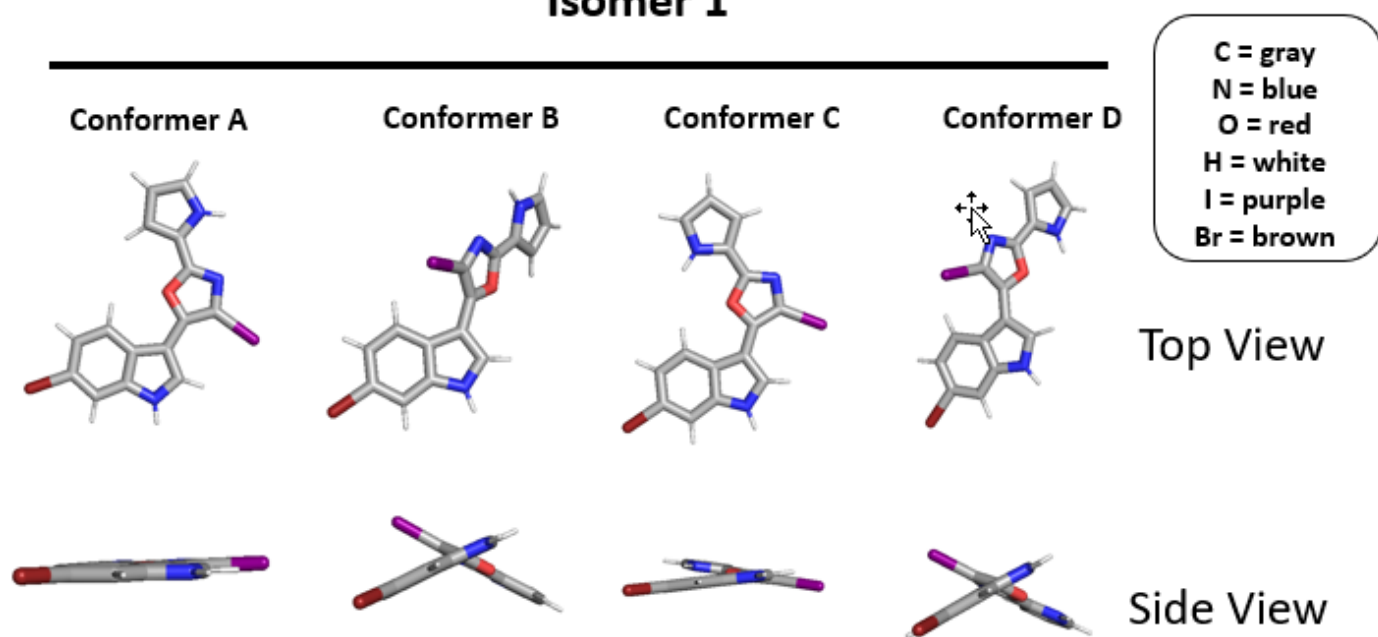

## Isomer 2

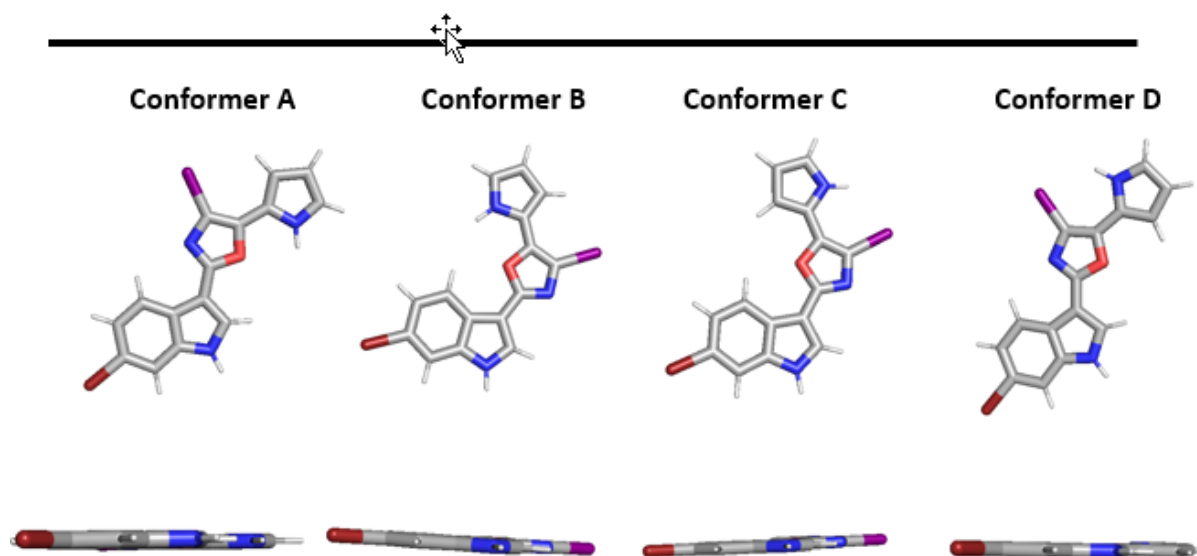

**Figure S14.** Top and side views of the four conformers of isomeric breitfussin A structures, 1-2.

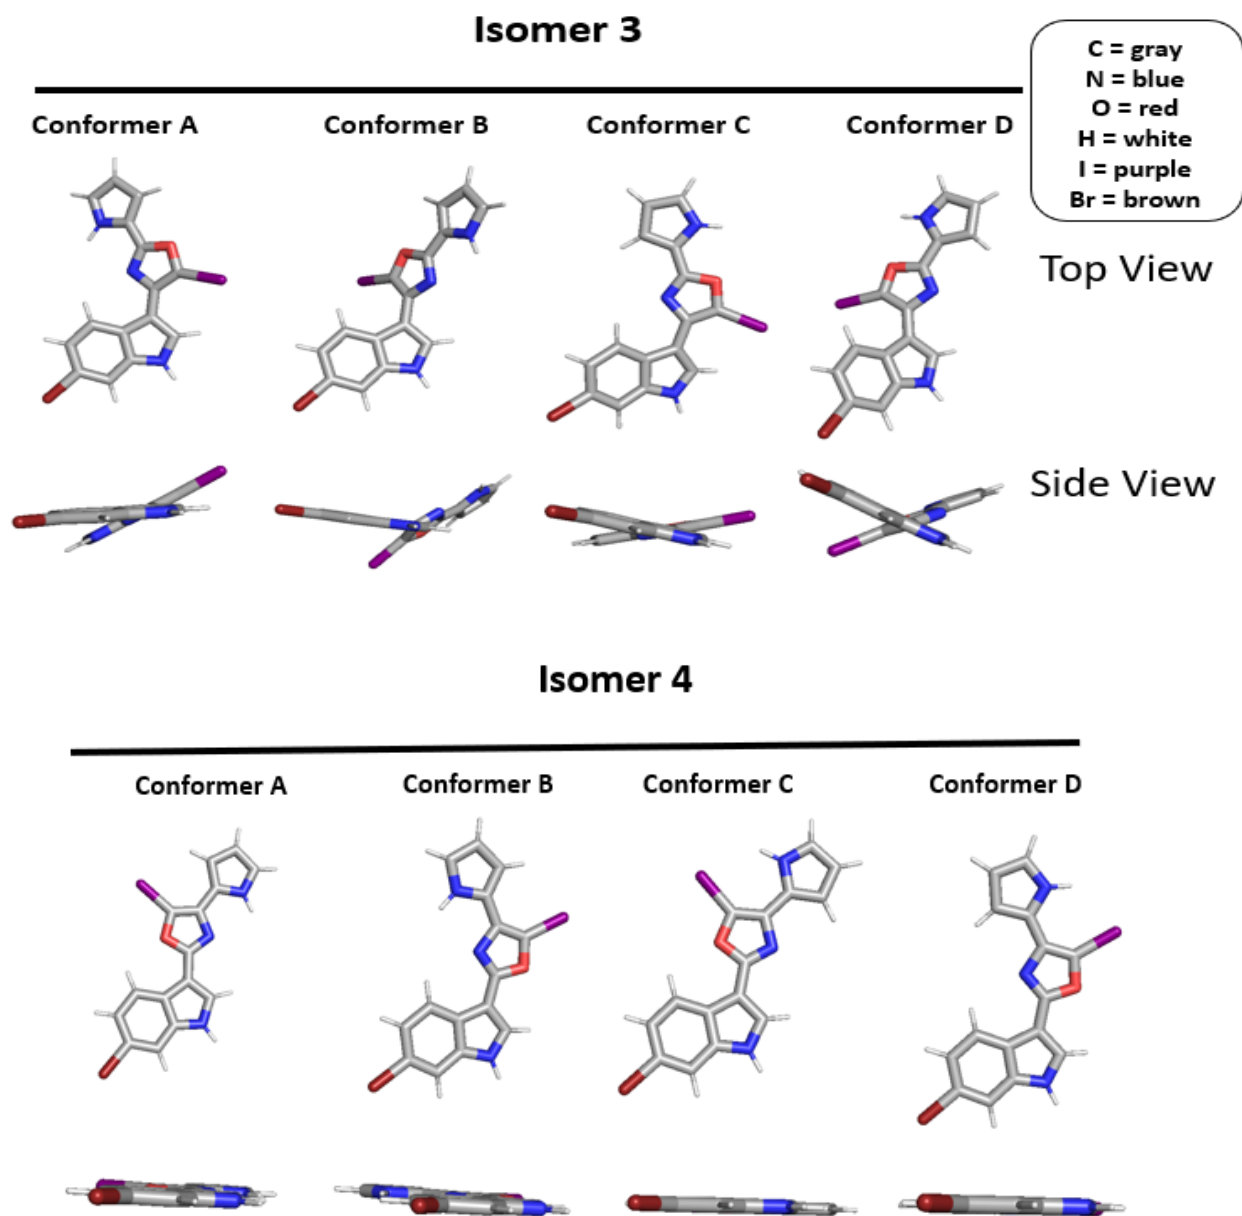

**Figure S15.** Top and side views of the four conformers of isomeric breitfussin A structures, 3-4.

**Table S5.** Absolute value of biaryl dihedral angle between the oxazole and indole ring (degree of planarity estimate) for the different conformations of **1-4**. (See **Figure S14** and **Figure S15** above).

| <b>Conformer</b> | <b>Isomer 1</b> | <b>Isomer 2</b> | <b>Isomer 3</b> | <b>Isomer 4</b> |
|------------------|-----------------|-----------------|-----------------|-----------------|
| A                | 2.3°            | 0.0°            | 27.3°           | 0.0°            |
| B                | 49.9°           | 0.0°            | 47.4°           | 0.0°            |
| C                | 14.8°           | 0.0°            | 25.4°           | 0.0°            |
| D                | 51.2°           | 0.0°            | 48.1°           | 0.0°            |

## DFT Structures of the Ten Isomeric Breitfussin A Analogs

| Breitfussin A analog Isomer 1 |             |        |        |             |        |        |             |        |        |             |        |        |
|-------------------------------|-------------|--------|--------|-------------|--------|--------|-------------|--------|--------|-------------|--------|--------|
| ATOM                          | Conformer 1 |        |        | Conformer 2 |        |        | Conformer 3 |        |        | Conformer 4 |        |        |
| C1                            | -3.318      | -0.233 | 1.042  | -4.056      | -0.102 | 1.704  | -3.208      | -0.475 | 1.118  | -4.24       | -0.312 | 1.096  |
| C2                            | -3.737      | -0.83  | 2.245  | -3.995      | -0.108 | 3.112  | -3.539      | -0.859 | 2.431  | -4.354      | -0.476 | 2.491  |
| C3                            | -2.858      | -1.381 | 3.156  | -2.822      | 0.079  | 3.818  | -2.591      | -1.185 | 3.38   | -3.284      | -0.348 | 3.356  |
| C4                            | -1.501      | -1.315 | 2.818  | -1.671      | 0.296  | 3.05   | -1.255      | -1.112 | 2.967  | -2.054      | -0.026 | 2.769  |
| C5                            | -1.032      | -0.724 | 1.62   | -1.694      | 0.335  | 1.637  | -0.875      | -0.728 | 1.658  | -1.903      | 0.171  | 1.377  |
| C6                            | -1.97       | -0.178 | 0.726  | -2.908      | 0.125  | 0.964  | -1.879      | -0.408 | 0.729  | -3.017      | 0.017  | 0.536  |
| N7                            | -0.41       | -1.77  | 3.515  | -0.369      | 0.475  | 3.45   | -0.11       | -1.378 | 3.675  | -0.818      | 0.132  | 3.348  |
| C8                            | 0.729       | -1.496 | 2.82   | 0.431       | 0.629  | 2.354  | 0.98        | -1.183 | 2.878  | 0.106       | 0.422  | 2.386  |
| C9                            | 0.408       | -0.851 | 1.641  | -0.336      | 0.557  | 1.211  | 0.569       | -0.783 | 1.623  | -0.51       | 0.463  | 1.154  |
| C10                           | 1.329       | -0.394 | 0.63   | 0.128       | 0.664  | -0.157 | 1.416       | -0.47  | 0.499  | 0.117       | 0.734  | -0.123 |
| Br11                          | -5.615      | -0.878 | 2.632  | -5.619      | -0.409 | 4.088  | -5.393      | -0.931 | 2.917  | -6.074      | -0.917 | 3.215  |
| C12                           | 2.68        | -0.368 | 0.45   | -0.257      | 1.38   | -1.245 | 2.721       | -0.653 | 0.153  | -0.143      | 1.574  | -1.158 |
| N13                           | 2.997       | 0.209  | -0.758 | 0.534       | 1.082  | -2.33  | 2.981       | -0.1   | -1.08  | 0.778       | 1.411  | -2.167 |
| C14                           | 1.845       | 0.517  | -1.277 | 1.379       | 0.204  | -1.87  | 1.84        | 0.396  | -1.454 | 1.576       | 0.486  | -1.716 |
| O15                           | 0.796       | 0.184  | -0.495 | 1.194       | -0.099 | -0.57  | 0.85        | 0.21   | -0.551 | 1.238       | 0.028  | -0.491 |
| C16                           | 1.579       | 1.149  | -2.544 | 2.446       | -0.448 | -2.586 | 1.519       | 1.091  | -2.676 | 2.74        | -0.072 | -2.358 |
| N17                           | 2.604       | 1.513  | -3.377 | 2.685       | -0.152 | -3.902 | 0.259       | 1.566  | -2.936 | 3.496       | -1.06  | -1.779 |
| C18                           | 2.097       | 2.082  | -4.504 | 3.732       | -0.895 | -4.354 | 0.244       | 2.177  | -4.153 | 4.524       | -1.391 | -2.607 |
| C19                           | 0.717       | 2.087  | -4.401 | 4.179       | -1.687 | -3.312 | 1.516       | 2.096  | -4.691 | 4.433       | -0.606 | -3.743 |
| C20                           | 0.385       | 1.494  | -3.156 | 3.365       | -1.406 | -2.187 | 2.328       | 1.407  | -3.757 | 3.302       | 0.232  | -3.587 |
| I21                           | 4.151       | -1.057 | 1.703  | -1.725      | 2.812  | -1.35  | 4.206       | -1.599 | 1.207  | -1.616      | 3.001  | -1.263 |
| H22                           | -4.051      | 0.186  | 0.36   | -5.003      | -0.271 | 1.203  | -3.993      | -0.233 | 0.411  | -5.112      | -0.44  | 0.464  |
| H23                           | -3.187      | -1.839 | 4.082  | -2.784      | 0.057  | 4.902  | -2.853      | -1.482 | 4.39   | -3.381      | -0.492 | 4.427  |

|     |        |        |        |        |        |        |        |        |        |        |        |        |
|-----|--------|--------|--------|--------|--------|--------|--------|--------|--------|--------|--------|--------|
| H24 | -1.657 | 0.285  | -0.203 | -2.948 | 0.122  | -0.121 | -1.634 | -0.113 | -0.286 | -2.923 | 0.133  | -0.54  |
| H25 | -0.44  | -2.234 | 4.415  | -0.046 | 0.491  | 4.409  | -0.073 | -1.674 | 4.642  | -0.617 | 0.047  | 4.337  |
| H26 | 1.694  | -1.78  | 3.214  | 1.495  | 0.788  | 2.462  | 1.978  | -1.332 | 3.263  | 1.143  | 0.588  | 2.645  |
| H27 | 3.589  | 1.377  | -3.178 | 2.159  | 0.52   | -4.449 | -0.542 | 1.481  | -2.322 | 3.324  | -1.482 | -0.874 |
| H28 | 2.751  | 2.437  | -5.287 | 4.075  | -0.804 | -5.375 | -0.664 | 2.618  | -4.538 | 5.234  | -2.155 | -2.326 |
| H29 | 0.028  | 2.474  | -5.138 | 5      | -2.389 | -3.357 | 1.824  | 2.49   | -5.65  | 5.106  | -0.635 | -4.588 |
| H30 | -0.604 | 1.335  | -2.748 | 3.431  | -1.845 | -1.201 | 3.377  | 1.164  | -3.846 | 2.928  | 0.974  | -4.28  |



| Breitfussin A analog isomer 2 |             |   |        |             |        |        |             |   |        |             |        |        |
|-------------------------------|-------------|---|--------|-------------|--------|--------|-------------|---|--------|-------------|--------|--------|
| ATOM                          | Conformer 1 |   |        | Conformer 2 |        |        | Conformer 3 |   |        | Conformer 4 |        |        |
| C1                            | -2.018      | 0 | -4.233 | -0.739      | -0.026 | -3.433 | -0.722      | 0 | -3.502 | -1.923      | -0.013 | -4.282 |
| C2                            | -0.976      | 0 | -5.179 | 0.213       | -0.011 | -4.47  | 0.241       | 0 | -4.528 | -0.871      | -0.028 | -5.217 |
| C3                            | 0.361       | 0 | -4.828 | 1.575       | 0.007  | -4.239 | 1.601       | 0 | -4.283 | 0.462       | -0.029 | -4.852 |
| C4                            | 0.634       | 0 | -3.456 | 1.97        | 0.009  | -2.897 | 1.982       | 0 | -2.937 | 0.721       | -0.013 | -3.477 |
| C5                            | -0.382      | 0 | -2.472 | 1.048       | -0.006 | -1.822 | 1.049       | 0 | -1.872 | -0.306      | 0.003  | -2.504 |
| C6                            | -1.726      | 0 | -2.878 | -0.327      | -0.023 | -2.11  | -0.324      | 0 | -2.174 | -1.646      | 0.004  | -2.924 |
| N7                            | 1.847       | 0 | -2.806 | 3.237       | 0.023  | -2.363 | 3.244       | 0 | -2.389 | 1.926       | -0.012 | -2.815 |
| C8                            | 1.648       | 0 | -1.46  | 3.165       | 0.018  | -1.005 | 3.156       | 0 | -1.032 | 1.713       | 0.002  | -1.47  |
| C9                            | 0.293       | 0 | -1.199 | 1.841       | 0.001  | -0.617 | 1.828       | 0 | -0.659 | 0.355       | 0.013  | -1.224 |
| C10                           | -0.335      | 0 | 0.096  | 1.385       | -0.008 | 0.75   | 1.355       | 0 | 0.703  | -0.281      | 0.029  | 0.067  |
| Br11                          | -1.437      | 0 | -7.041 | -0.414      | -0.018 | -6.282 | -0.366      | 0 | -6.347 | -1.311      | -0.051 | -7.084 |
| O12                           | 0.449       | 0 | 1.203  | 0.049       | 0      | 0.977  | 0.017       | 0 | 0.91   | 0.497       | 0.007  | 1.176  |
| C13                           | -0.409      | 0 | 2.272  | -0.104      | -0.007 | 2.339  | -0.156      | 0 | 2.268  | -0.363      | 0.032  | 2.24   |
| C14                           | -1.664      | 0 | 1.747  | 1.155       | -0.019 | 2.855  | 1.096       | 0 | 2.802  | -1.615      | 0.068  | 1.709  |
| N15                           | -1.607      | 0 | 0.371  | 2.088       | -0.021 | 1.845  | 2.046       | 0 | 1.806  | -1.555      | 0.065  | 0.334  |
| C16                           | 0.173       | 0 | 3.59   | -1.45       | 0      | 2.854  | -1.511      | 0 | 2.757  | 0.223       | 0.011  | 3.557  |
| N17                           | 1.536       | 0 | 3.759  | -2.529      | 0.044  | 2.005  | -1.821      | 0 | 4.094  | -0.528      | -0.04  | 4.705  |
| C18                           | 1.838       | 0 | 5.089  | -3.686      | 0.041  | 2.727  | -3.175      | 0 | 4.253  | 0.293       | -0.053 | 5.793  |
| C19                           | 0.651       | 0 | 5.796  | -3.353      | -0.007 | 4.066  | -3.755      | 0 | 2.999  | 1.6         | -0.007 | 5.345  |
| C20                           | -0.407      | 0 | 4.851  | -1.938      | -0.032 | 4.153  | -2.703      | 0 | 2.047  | 1.559       | 0.033  | 3.927  |
| I21                           | -3.464      | 0 | 2.726  | 1.733       | -0.031 | 4.821  | 1.641       | 0 | 4.78   | -3.419      | 0.132  | 2.686  |
| H22                           | -3.05       | 0 | -4.566 | -1.797      | -0.04  | -3.671 | -1.777      | 0 | -3.75  | -2.952      | -0.014 | -4.626 |
| H23                           | 1.158       | 0 | -5.564 | 2.304       | 0.019  | -5.042 | 2.338       | 0 | -5.078 | 1.267       | -0.041 | -5.578 |
| H24                           | -2.528      | 0 | -2.147 | -1.068      | -0.036 | -1.318 | -1.071      | 0 | -1.388 | -2.455      | 0.016  | -2.202 |

|     |        |   |        |        |        |        |        |   |        |        |        |        |
|-----|--------|---|--------|--------|--------|--------|--------|---|--------|--------|--------|--------|
| H25 | 2.754  | 0 | -3.256 | 4.098  | 0.036  | -2.896 | 4.111  | 0 | -2.913 | 2.838  | -0.021 | -3.255 |
| H26 | 2.487  | 0 | -0.777 | 4.059  | 0.028  | -0.397 | 4.044  | 0 | -0.415 | 2.544  | 0.005  | -0.779 |
| H27 | 2.218  | 0 | 3.011  | -2.479 | 0.082  | 0.995  | -1.145 | 0 | 4.848  | -1.54  | -0.079 | 4.741  |
| H28 | 2.866  | 0 | 5.421  | -4.646 | 0.072  | 2.231  | -3.614 | 0 | 5.24   | -0.116 | -0.092 | 6.792  |
| H29 | 0.555  | 0 | 6.873  | -4.05  | -0.022 | 4.893  | -4.816 | 0 | 2.792  | 2.483  | -0.002 | 5.968  |
| H30 | -1.466 | 0 | 5.059  | -1.34  | -0.07  | 5.051  | -2.793 | 0 | 0.969  | 2.4    | 0.075  | 3.249  |

| Breitfussin A analog isomer 3 |             |        |        |             |        |        |             |        |        |             |        |        |
|-------------------------------|-------------|--------|--------|-------------|--------|--------|-------------|--------|--------|-------------|--------|--------|
| ATOM                          | Conformer 1 |        |        | Conformer 2 |        |        | Conformer 3 |        |        | Conformer 4 |        |        |
| C1                            | 3.124       | 1.952  | 0.222  | 4.379       | 0.49   | -0.344 | 3.409       | 1.522  | 0.38   | 4.275       | 1.042  | -0.38  |
| C2                            | 3.143       | 3.305  | 0.613  | 4.783       | 1.772  | 0.078  | 3.601       | 2.811  | 0.911  | 4.517       | 2.398  | -0.082 |
| C3                            | 2.022       | 3.975  | 1.061  | 3.891       | 2.772  | 0.416  | 2.574       | 3.57   | 1.439  | 3.509       | 3.306  | 0.176  |
| C4                            | 0.837       | 3.231  | 1.109  | 2.533       | 2.45   | 0.301  | 1.302       | 2.984  | 1.417  | 2.201       | 2.809  | 0.109  |
| C5                            | 0.77        | 1.87   | 0.723  | 2.084       | 1.186  | -0.149 | 1.062       | 1.692  | 0.888  | 1.912       | 1.462  | -0.217 |
| C6                            | 1.94        | 1.233  | 0.275  | 3.03        | 0.195  | -0.46  | 2.142       | 0.96   | 0.366  | 2.974       | 0.573  | -0.451 |
| N7                            | -0.418      | 3.612  | 1.512  | 1.423       | 3.204  | 0.592  | 0.104       | 3.479  | 1.867  | 1.008       | 3.444  | 0.346  |
| C8                            | -1.276      | 2.553  | 1.4    | 0.295       | 2.471  | 0.347  | -0.883      | 2.56   | 1.647  | -0.021      | 2.558  | 0.185  |
| C9                            | -0.597      | 1.454  | 0.92   | 0.644       | 1.225  | -0.119 | -0.35       | 1.44   | 1.047  | 0.478       | 1.327  | -0.171 |
| Br10                          | 4.807       | 4.256  | 0.525  | 6.663       | 2.136  | 0.2    | 5.375       | 3.543  | 0.901  | 6.337       | 3.002  | -0.016 |
| C11                           | -1.14       | 0.133  | 0.655  | -0.275      | 0.153  | -0.483 | -1.061      | 0.24   | 0.639  | -0.304      | 0.124  | -0.426 |
| C12                           | -2.2        | -0.519 | 1.203  | -0.277      | -0.647 | -1.58  | -2.222      | -0.301 | 1.095  | -0.216      | -0.757 | -1.456 |
| O13                           | -2.329      | -1.736 | 0.599  | -1.321      | -1.521 | -1.485 | -2.497      | -1.424 | 0.367  | -1.146      | -1.739 | -1.272 |
| C14                           | -1.32       | -1.78  | -0.294 | -1.926      | -1.201 | -0.322 | -1.469      | -1.526 | -0.504 | -1.776      | -1.401 | -0.124 |
| N15                           | -0.584      | -0.709 | -0.307 | -1.354      | -0.222 | 0.314  | -0.592      | -0.574 | -0.389 | -1.322      | -0.311 | 0.419  |
| I16                           | -3.535      | -0.085 | 2.681  | 0.827       | -0.699 | -3.293 | -3.541      | 0.19   | 2.569  | 0.87        | -0.806 | -3.179 |
| N17                           | -0.174      | -3.065 | -2.03  | -3.735      | -1.69  | 1.247  | -2.465      | -3.574 | -1.453 | -3.22       | -3.386 | -0.342 |
| C18                           | -1.177      | -2.966 | -1.102 | -3.09       | -1.956 | 0.069  | -1.466      | -2.634 | -1.427 | -2.834      | -2.263 | 0.344  |
| C19                           | -1.911      | -4.141 | -1.135 | -3.761      | -2.989 | -0.566 | -0.54       | -2.967 | -2.403 | -3.625      | -2.158 | 1.476  |
| C20                           | -1.318      | -4.968 | -2.121 | -4.846      | -3.349 | 0.271  | -1.006      | -4.148 | -3.029 | -4.515      | -3.26  | 1.461  |
| C21                           | -0.247      | -4.271 | -2.654 | -4.8        | -2.526 | 1.383  | -2.199      | -4.496 | -2.418 | -4.237      | -4     | 0.324  |
| H22                           | 4.036       | 1.475  | -0.119 | 5.124       | -0.262 | -0.578 | 4.253       | 0.97   | -0.018 | 5.108       | 0.37   | -0.554 |
| H23                           | 2.048       | 5.016  | 1.364  | 4.215       | 3.75   | 0.756  | 2.733       | 4.561  | 1.85   | 3.709       | 4.343  | 0.422  |
| H24                           | 1.923       | 0.191  | -0.025 | 2.714       | -0.794 | -0.776 | 1.992       | -0.033 | -0.045 | 2.786       | -0.474 | -0.669 |

|     |        |        |        |        |        |        |        |        |        |        |        |        |
|-----|--------|--------|--------|--------|--------|--------|--------|--------|--------|--------|--------|--------|
| H25 | -0.676 | 4.536  | 1.836  | 1.434  | 4.156  | 0.936  | -0.034 | 4.388  | 2.291  | 0.902  | 4.418  | 0.601  |
| H26 | -2.32  | 2.662  | 1.659  | -0.687 | 2.893  | 0.514  | -1.906 | 2.774  | 1.921  | -1.048 | 2.869  | 0.327  |
| H27 | 0.514  | -2.345 | -2.218 | -3.455 | -0.98  | 1.913  | -3.28  | -3.587 | -0.851 | -2.813 | -3.719 | -1.207 |
| H28 | -2.77  | -4.368 | -0.517 | -3.494 | -3.425 | -1.519 | 0.362  | -2.413 | -2.625 | -3.558 | -1.373 | 2.217  |
| H29 | -1.635 | -5.96  | -2.411 | -5.579 | -4.122 | 0.086  | -0.528 | -4.686 | -3.836 | -5.274 | -3.491 | 2.196  |
| H30 | 0.462  | -4.54  | -3.423 | -5.438 | -2.472 | 2.253  | -2.873 | -5.321 | -2.595 | -4.68  | -4.907 | -0.059 |

| Breitfussin A analog isomer 4 |             |   |        |             |   |        |             |   |        |             |   |        |
|-------------------------------|-------------|---|--------|-------------|---|--------|-------------|---|--------|-------------|---|--------|
| ATOM                          | Conformer 1 |   |        | Conformer 2 |   |        | Conformer 3 |   |        | Conformer 4 |   |        |
| C1                            | 1.959       | 0 | -4.15  | 0.562       | 0 | -3.732 | 1.868       | 0 | -4.185 | 0.5         | 0 | -3.822 |
| C2                            | 0.971       | 0 | -5.152 | -0.491      | 0 | -4.666 | 0.873       | 0 | -5.18  | -0.578      | 0 | -4.728 |
| C3                            | -0.382      | 0 | -4.873 | -1.824      | 0 | -4.299 | -0.478      | 0 | -4.892 | -1.9        | 0 | -4.325 |
| C4                            | -0.73       | 0 | -3.517 | -2.081      | 0 | -2.924 | -0.816      | 0 | -3.534 | -2.12       | 0 | -2.944 |
| C5                            | 0.23        | 0 | -2.477 | -1.054      | 0 | -1.952 | 0.15        | 0 | -2.5   | -1.067      | 0 | -1.999 |
| C6                            | 1.595       | 0 | -2.813 | 0.286       | 0 | -2.374 | 1.513       | 0 | -2.845 | 0.26        | 0 | -2.457 |
| N7                            | -1.977      | 0 | -2.938 | -3.286      | 0 | -2.26  | -2.06       | 0 | -2.946 | -3.308      | 0 | -2.249 |
| C8                            | -1.855      | 0 | -1.584 | -3.072      | 0 | -0.917 | -1.929      | 0 | -1.593 | -3.058      | 0 | -0.912 |
| C9                            | -0.518      | 0 | -1.244 | -1.714      | 0 | -0.671 | -0.59       | 0 | -1.262 | -1.694      | 0 | -0.702 |
| C10                           | -0.009      | 0 | 0.104  | -1.079      | 0 | 0.622  | -0.072      | 0 | 0.084  | -1.028      | 0 | 0.576  |
| Br11                          | 1.533       | 0 | -6.985 | -0.053      | 0 | -6.533 | 1.423       | 0 | -7.016 | -0.19       | 0 | -6.606 |
| N12                           | -0.663      | 0 | 1.228  | 0.193       | 0 | 0.896  | -0.722      | 0 | 1.21   | 0.249       | 0 | 0.821  |
| C13                           | 0.307       | 0 | 2.224  | 0.273       | 0 | 2.285  | 0.252       | 0 | 2.203  | 0.362       | 0 | 2.208  |
| C14                           | 1.524       | 0 | 1.621  | -0.993      | 0 | 2.775  | 1.466       | 0 | 1.591  | -0.895      | 0 | 2.724  |
| O15                           | 1.333       | 0 | 0.269  | -1.864      | 0 | 1.723  | 1.272       | 0 | 0.24   | -1.79       | 0 | 1.694  |
| C16                           | -0.067      | 0 | 3.625  | 1.558       | 0 | 2.955  | -0.127      | 0 | 3.603  | 1.664       | 0 | 2.846  |
| N17                           | -1.391      | 0 | 3.979  | 2.713       | 0 | 2.216  | 0.777       | 0 | 4.636  | 1.841       | 0 | 4.207  |
| C18                           | -1.513      | 0 | 5.337  | 3.797       | 0 | 3.042  | 0.117       | 0 | 5.83   | 3.174       | 0 | 4.502  |
| C19                           | -0.24       | 0 | 5.877  | 3.337       | 0 | 4.346  | -1.24       | 0 | 5.569  | 3.875       | 0 | 3.312  |
| C20                           | 0.679       | 0 | 4.794  | 1.918       | 0 | 4.294  | -1.396      | 0 | 4.158  | 2.92        | 0 | 2.26   |
| I21                           | 3.454       | 0 | 2.271  | -1.811      | 0 | 4.641  | 3.402       | 0 | 2.229  | -1.672      | 0 | 4.609  |
| H22                           | 3.008       | 0 | -4.425 | 1.59        | 0 | -4.076 | 2.915       | 0 | -4.466 | 1.519       | 0 | -4.194 |
| H23                           | -1.139      | 0 | -5.649 | -2.63       | 0 | -5.025 | -1.24       | 0 | -5.663 | -2.725      | 0 | -5.029 |
| H24                           | 2.362       | 0 | -2.047 | 1.095       | 0 | -1.651 | 2.285       | 0 | -2.084 | 1.089       | 0 | -1.757 |

|     |        |   |        |        |   |        |        |   |        |        |        |        |
|-----|--------|---|--------|--------|---|--------|--------|---|--------|--------|--------|--------|
| H25 | -2.857 | 0 | -3.44  | -4.199 | 0 | -2.7   | -2.943 | 0 | -3.442 | -4.231 | 0      | -2.665 |
| H26 | -2.727 | 0 | -0.944 | -3.903 | 0 | -0.225 | -2.797 | 0 | -0.948 | -3.87  | 0      | -0.198 |
| H27 | -2.159 | 0 | 3.318  | 2.742  | 0 | 1.204  | 1.784  | 0 | 4.533  | 1.097  | 0      | 4.894  |
| H28 | -2.485 | 0 | 5.807  | 4.801  | 0 | 2.642  | 0.663  | 0 | 6.763  | 3.512  | 0      | 5.528  |
| H29 | 0.001  | 0 | 6.931  | 3.953  | 0 | 5.235  | -2.027 | 0 | 6.31   | 4.951  | -0.001 | 3.211  |
| H30 | 1.757  | 0 | 4.853  | 1.234  | 0 | 5.13   | -2.322 | 0 | 3.598  | 3.112  | 0      | 1.196  |

| Breitfussin A analog isomer 5 |             |        |        |             |        |        |             |        |        |             |        |        |
|-------------------------------|-------------|--------|--------|-------------|--------|--------|-------------|--------|--------|-------------|--------|--------|
| ATOM                          | Conformer 1 |        |        | Conformer 2 |        |        | Conformer 3 |        |        | Conformer 4 |        |        |
| C1                            | 2.16        | 0.14   | 3.919  | 1.255       | -1.183 | 3.711  | 2.39        | 0.098  | 3.823  | 1.091       | -1.108 | 3.752  |
| C2                            | 1.314       | 0.244  | 5.039  | 0.364       | -1.134 | 4.8    | 1.591       | 0.128  | 4.98   | 0.19        | -0.946 | 4.822  |
| C3                            | -0.062      | 0.294  | 4.935  | -0.969      | -0.797 | 4.67   | 0.21        | 0.12   | 4.939  | -1.118      | -0.536 | 4.652  |
| C4                            | -0.584      | 0.236  | 3.639  | -1.4        | -0.487 | 3.375  | -0.365      | 0.081  | 3.664  | -1.512      | -0.272 | 3.335  |
| C5                            | 0.226       | 0.133  | 2.483  | -0.532      | -0.492 | 2.259  | 0.397       | 0.05   | 2.472  | -0.631      | -0.394 | 2.235  |
| C6                            | 1.622       | 0.084  | 2.643  | 0.81        | -0.865 | 2.438  | 1.799       | 0.059  | 2.57   | 0.682       | -0.84  | 2.456  |
| N7                            | -1.895      | 0.265  | 3.23   | -2.657      | -0.16  | 2.924  | -1.694      | 0.069  | 3.312  | -2.742      | 0.101  | 2.845  |
| C8                            | -1.959      | 0.187  | 1.875  | -2.626      | 0.033  | 1.576  | -1.814      | 0.034  | 1.96   | -2.682      | 0.211  | 1.489  |
| C9                            | -0.68       | 0.103  | 1.355  | -1.34       | -0.15  | 1.116  | -0.556      | 0.02   | 1.384  | -1.403      | -0.075 | 1.062  |
| C10                           | -0.31       | 0.006  | -0.036 | -0.91       | -0.048 | -0.265 | -0.242      | -0.024 | -0.024 | -0.947      | -0.069 | -0.315 |
| Br11                          | 2.11        | 0.322  | 6.781  | 1.035       | -1.573 | 6.542  | 2.461       | 0.184  | 6.687  | 0.81        | -1.331 | 6.596  |
| C12                           | -0.977      | -0.035 | -1.231 | 0.138       | 0.569  | -0.886 | -0.958      | -0.014 | -1.192 | 0.133       | 0.474  | -0.948 |
| C13                           | 0.047       | -0.133 | -2.219 | -0.028      | 0.262  | -2.271 | 0.024       | -0.079 | -2.227 | -0.021      | 0.101  | -2.32  |
| N14                           | 1.231       | -0.15  | -1.647 | -1.103      | -0.477 | -2.443 | 1.23        | -0.124 | -1.704 | -1.121      | -0.604 | -2.471 |
| O15                           | 1.01        | -0.062 | -0.288 | -1.652      | -0.675 | -1.194 | 1.063       | -0.091 | -0.334 | -1.694      | -0.717 | -1.223 |
| C16                           | -0.036      | -0.212 | -3.669 | 0.768       | 0.643  | -3.425 | -0.106      | -0.099 | -3.678 | 0.803       | 0.382  | -3.487 |
| N17                           | 1.114       | -0.267 | -4.418 | 0.357       | 0.304  | -4.691 | -1.304      | -0.025 | -4.342 | 1.927       | 1.168  | -3.453 |
| C18                           | 0.805       | -0.344 | -5.741 | 1.262       | 0.743  | -5.607 | -1.094      | -0.064 | -5.686 | 2.472       | 1.252  | -4.697 |
| C19                           | -0.572      | -0.34  | -5.859 | 2.284       | 1.379  | -4.928 | 0.268       | -0.166 | -5.904 | 1.688       | 0.507  | -5.56  |
| C20                           | -1.107      | -0.256 | -4.548 | 1.973       | 1.319  | -3.545 | 0.895       | -0.188 | -4.635 | 0.631       | -0.044 | -4.796 |
| I21                           | -3.003      | 0.037  | -1.513 | 1.515       | 1.793  | 0.007  | -2.996      | 0.087  | -1.378 | 1.545       | 1.679  | -0.082 |
| H22                           | 3.235       | 0.104  | 4.055  | 2.289       | -1.47  | 3.869  | 3.47        | 0.106  | 3.911  | 2.103       | -1.449 | 3.943  |
| H23                           | -0.711      | 0.375  | 5.801  | -1.652      | -0.779 | 5.513  | -0.403      | 0.144  | 5.833  | -1.81       | -0.434 | 5.481  |
| H24                           | 2.283       | 0.004  | 1.787  | 1.493       | -0.911 | 1.596  | 2.424       | 0.036  | 1.684  | 1.37        | -0.978 | 1.628  |

|     |        |        |        |        |        |        |        |        |        |        |        |        |
|-----|--------|--------|--------|--------|--------|--------|--------|--------|--------|--------|--------|--------|
| H25 | -2.699 | 0.337  | 3.842  | -3.484 | -0.073 | 3.503  | -2.472 | 0.086  | 3.96   | -3.569 | 0.27   | 3.404  |
| H26 | -2.914 | 0.197  | 1.372  | -3.522 | 0.304  | 1.033  | -2.79  | 0.017  | 1.5    | -3.552 | 0.502  | 0.915  |
| H27 | 2.053  | -0.251 | -4.038 | -0.496 | -0.198 | -4.906 | -2.213 | 0.05   | -3.902 | 2.296  | 1.624  | -2.628 |
| H28 | 1.582  | -0.395 | -6.49  | 1.109  | 0.572  | -6.663 | -1.924 | -0.017 | -6.376 | 3.368  | 1.831  | -4.87  |
| H29 | -1.131 | -0.39  | -6.783 | 3.155  | 1.838  | -5.375 | 0.754  | -0.219 | -6.869 | 1.861  | 0.375  | -6.619 |
| H30 | -2.15  | -0.232 | -4.275 | 2.561  | 1.714  | -2.731 | 1.954  | -0.26  | -4.427 | -0.169 | -0.682 | -5.147 |



| Breitfussin A analog isomer 6 |             |        |        |             |        |        |             |        |        |             |        |        |
|-------------------------------|-------------|--------|--------|-------------|--------|--------|-------------|--------|--------|-------------|--------|--------|
| ATOM                          | Conformer 1 |        |        | Conformer 2 |        |        | Conformer 3 |        |        | Conformer 4 |        |        |
| C1                            | -4.368      | 0.648  | 1.017  | -3.988      | -0.723 | -0.19  | -4.362      | 0.704  | 1.146  | -3.794      | -1.326 | 0.296  |
| C2                            | -5.166      | 0.921  | -0.109 | -4.714      | -0.358 | -1.341 | -5.166      | 1.017  | 0.035  | -4.678      | -1.175 | -0.791 |
| C3                            | -4.655      | 0.99   | -1.391 | -4.117      | 0.115  | -2.493 | -4.668      | 1.103  | -1.251 | -4.275      | -0.739 | -2.039 |
| C4                            | -3.279      | 0.769  | -1.517 | -2.721      | 0.227  | -2.46  | -3.299      | 0.858  | -1.398 | -2.914      | -0.438 | -2.175 |
| C5                            | -2.437      | 0.489  | -0.415 | -1.957      | -0.106 | -1.317 | -2.45       | 0.538  | -0.311 | -1.998      | -0.552 | -1.102 |
| C6                            | -3.007      | 0.432  | 0.869  | -2.609      | -0.603 | -0.177 | -3.006      | 0.465  | 0.978  | -2.454      | -1.016 | 0.143  |
| N7                            | -2.5        | 0.772  | -2.648 | -1.847      | 0.621  | -3.444 | -2.532      | 0.87   | -2.537 | -2.211      | -0.023 | -3.279 |
| C8                            | -1.206      | 0.507  | -2.315 | -0.565      | 0.543  | -2.976 | -1.24       | 0.574  | -2.224 | -0.892      | 0.122  | -2.955 |
| C9                            | -1.103      | 0.324  | -0.951 | -0.578      | 0.105  | -1.673 | -1.125      | 0.36   | -0.865 | -0.708      | -0.187 | -1.627 |
| C10                           | 0.093       | 0.007  | -0.184 | 0.592       | -0.121 | -0.828 | 0.072       | 0.001  | -0.12  | 0.561       | -0.165 | -0.905 |
| Br11                          | -7.044      | 1.204  | 0.151  | -6.623      | -0.544 | -1.306 | -7.035      | 1.335  | 0.325  | -6.528      | -1.609 | -0.523 |
| C12                           | 1.458       | -0.142 | -0.59  | 0.86        | 0.4    | 0.472  | 1.429       | -0.167 | -0.545 | 0.881       | 0.517  | 0.307  |
| C13                           | 2.134       | -0.449 | 0.557  | 2.088       | -0.102 | 0.801  | 2.112       | -0.512 | 0.587  | 2.197       | 0.224  | 0.534  |
| O14                           | 1.258       | -0.482 | 1.575  | 2.52        | -0.868 | -0.217 | 1.249       | -0.551 | 1.613  | 2.631       | -0.576 | -0.456 |
| N15                           | -0.014      | -0.199 | 1.112  | 1.579       | -0.884 | -1.233 | -0.021      | -0.232 | 1.172  | 1.604       | -0.823 | -1.35  |
| C16                           | 3.508       | -0.731 | 0.896  | 2.971       | 0.021  | 1.933  | 3.482       | -0.83  | 0.912  | 3.169       | 0.579  | 1.537  |
| N17                           | 3.857       | -1.028 | 2.192  | 4.195       | -0.605 | 1.945  | 4.5         | -0.851 | -0.009 | 2.891       | 1.416  | 2.59   |
| C18                           | 5.195       | -1.255 | 2.269  | 4.832       | -0.345 | 3.118  | 5.665       | -1.188 | 0.603  | 4           | 1.564  | 3.361  |
| C19                           | 5.731       | -1.104 | 1.002  | 4.011       | 0.464  | 3.885  | 5.405       | -1.392 | 1.948  | 5.02        | 0.812  | 2.804  |
| C20                           | 4.666       | -0.772 | 0.13   | 2.833       | 0.698  | 3.138  | 4.023       | -1.166 | 2.146  | 4.496       | 0.187  | 1.647  |
| I21                           | 2.271       | 0.055  | -2.457 | -0.294      | 1.728  | 1.512  | 2.226       | 0.06   | -2.419 | -0.343      | 1.774  | 1.357  |
| H22                           | -4.819      | 0.607  | 2.002  | -4.512      | -1.099 | 0.682  | -4.802      | 0.65   | 2.135  | -4.166      | -1.684 | 1.25   |
| H23                           | -5.274      | 1.201  | -2.256 | -4.685      | 0.38   | -3.379 | -5.293      | 1.345  | -2.104 | -4.963      | -0.641 | -2.872 |
| H24                           | -2.396      | 0.221  | 1.74   | -2.043      | -0.893 | 0.703  | -2.39       | 0.223  | 1.836  | -1.765      | -1.14  | 0.973  |

|     |        |        |        |        |        |        |        |        |        |        |        |        |
|-----|--------|--------|--------|--------|--------|--------|--------|--------|--------|--------|--------|--------|
| H25 | -2.831 | 0.94   | -3.59  | -2.107 | 0.928  | -4.373 | -2.87  | 1.064  | -3.471 | -2.607 | 0.152  | -4.195 |
| H26 | -0.448 | 0.464  | -3.081 | 0.274  | 0.819  | -3.6   | -0.492 | 0.532  | -3     | -0.17  | 0.45   | -3.69  |
| H27 | 3.217  | -1.076 | 2.975  | 4.573  | -1.173 | 1.197  | 4.399  | -0.646 | -0.996 | 1.996  | 1.859  | 2.763  |
| H28 | 5.659  | -1.506 | 3.211  | 5.814  | -0.751 | 3.315  | 6.584  | -1.257 | 0.04   | 3.98   | 2.19   | 4.242  |
| H29 | 6.772  | -1.219 | 0.736  | 4.237  | 0.842  | 4.871  | 6.131  | -1.671 | 2.699  | 6.026  | 0.725  | 3.188  |
| H30 | 4.73   | -0.584 | -0.931 | 1.978  | 1.287  | 3.436  | 3.473  | -1.236 | 3.075  | 5.015  | -0.475 | 0.967  |

| Breitfussin A analog isomer 7 |             |        |        |             |        |        |             |        |        |             |        |        |
|-------------------------------|-------------|--------|--------|-------------|--------|--------|-------------|--------|--------|-------------|--------|--------|
| ATOM                          | Conformer 1 |        |        | Conformer 2 |        |        | Conformer 3 |        |        | Conformer 4 |        |        |
| C1                            | -0.272      | 0.212  | -4.374 | -1.633      | -0.804 | -2.143 | -0.191      | 0.294  | -4.425 | -1.72       | -0.572 | -2.157 |
| C2                            | -1.574      | 0.745  | -4.376 | -2.965      | -0.353 | -2.077 | -1.505      | 0.794  | -4.479 | -2.999      | 0.013  | -2.092 |
| C3                            | -2.269      | 1.033  | -3.218 | -3.521      | 0.181  | -0.931 | -2.27       | 1.016  | -3.35  | -3.512      | 0.57   | -0.937 |
| C4                            | -1.601      | 0.766  | -2.019 | -2.677      | 0.258  | 0.183  | -1.66       | 0.717  | -2.127 | -2.677      | 0.536  | 0.185  |
| C5                            | -0.293      | 0.229  | -1.967 | -1.327      | -0.169 | 0.16   | -0.341      | 0.215  | -2.023 | -1.376      | -0.022 | 0.162  |
| C6                            | 0.373       | -0.046 | -3.174 | -0.814      | -0.717 | -1.029 | 0.395       | 0.005  | -3.203 | -0.908      | -0.594 | -1.034 |
| N7                            | -2.032      | 0.946  | -0.725 | -2.955      | 0.714  | 1.449  | -2.164      | 0.835  | -0.854 | -2.92       | 0.986  | 1.462  |
| C8                            | -1.064      | 0.551  | 0.143  | -1.849      | 0.595  | 2.232  | -1.234      | 0.434  | 0.051  | -1.838      | 0.74   | 2.248  |
| C9                            | 0.033       | 0.096  | -0.567 | -0.813      | 0.062  | 1.491  | -0.086      | 0.041  | -0.611 | -0.853      | 0.127  | 1.5    |
| C10                           | 1.267       | -0.379 | 0.007  | 0.51        | -0.2   | 2.016  | 1.137       | -0.42  | 0      | 0.437       | -0.276 | 2.014  |
| Br11                          | -2.418      | 1.08   | -6.065 | -4.054      | -0.497 | -3.648 | -2.261      | 1.184  | -6.197 | -4.074      | 0.027  | -3.68  |
| C12                           | 1.687       | -0.591 | 1.298  | 1.766       | -0.244 | 1.464  | 1.548       | -0.637 | 1.295  | 1.685       | -0.396 | 1.457  |
| C13                           | 3.025       | -1.028 | 1.113  | 2.582       | -0.545 | 2.59   | 2.896       | -1.052 | 1.118  | 2.47        | -0.836 | 2.559  |
| N14                           | 3.386       | -1.082 | -0.139 | 1.907       | -0.667 | 3.698  | 3.27        | -1.094 | -0.129 | 1.788       | -0.964 | 3.661  |
| O15                           | 2.266       | -0.675 | -0.845 | 0.592       | -0.447 | 3.339  | 2.152       | -0.7   | -0.842 | 0.495       | -0.609 | 3.32   |
| I16                           | 4.354       | -1.552 | 2.592  | 4.628       | -0.762 | 2.625  | 4.214       | -1.568 | 2.612  | 4.489       | -1.228 | 2.527  |
| C17                           | 0.94        | -0.434 | 2.542  | 2.171       | 0.028  | 0.091  | 0.821       | -0.505 | 2.553  | 2.123       | -0.066 | 0.106  |
| N18                           | -0.156      | -1.211 | 2.823  | 1.725       | 1.137  | -0.58  | 1.275       | 0.316  | 3.555  | 2.688       | -1.004 | -0.72  |
| C19                           | -0.698      | -0.842 | 4.02   | 2.183       | 1.123  | -1.865 | 0.454       | 0.231  | 4.641  | 2.958       | -0.452 | -1.938 |
| C20                           | 0.064       | 0.192  | 4.529  | 2.949       | -0.015 | -2.03  | -0.555      | -0.663 | 4.34   | 2.561       | 0.87   | -1.903 |
| C21                           | 1.103       | 0.451  | 3.592  | 2.943       | -0.71  | -0.789 | -0.32       | -1.134 | 3.019  | 2.033       | 1.116  | -0.605 |
| H22                           | 0.23        | 0.004  | -5.313 | -1.248      | -1.222 | -3.066 | 0.365       | 0.136  | -5.342 | -1.37       | -1.008 | -3.086 |
| H23                           | -3.274      | 1.443  | -3.225 | -4.551      | 0.517  | -0.884 | -3.283      | 1.401  | -3.396 | -4.503      | 1.008  | -0.89  |
| H24                           | 1.377       | -0.455 | -3.181 | 0.21        | -1.075 | -1.087 | 1.409       | -0.378 | -3.172 | 0.073       | -1.055 | -1.092 |

|     |        |        |        |        |        |        |        |        |       |        |        |        |
|-----|--------|--------|--------|--------|--------|--------|--------|--------|-------|--------|--------|--------|
| H25 | -2.933 | 1.321  | -0.455 | -3.844 | 1.089  | 1.756  | -3.093 | 1.166  | -0.62 | -3.77  | 1.441  | 1.772  |
| H26 | -1.221 | 0.624  | 1.211  | -1.865 | 0.909  | 3.266  | -1.45  | 0.453  | 1.11  | -1.831 | 1.031  | 3.289  |
| H27 | -0.504 | -1.954 | 2.229  | 1.135  | 1.856  | -0.179 | 2.096  | 0.905  | 3.487 | 2.861  | -1.969 | -0.465 |
| H28 | -1.569 | -1.345 | 4.414  | 1.938  | 1.922  | -2.55  | 0.651  | 0.81   | 5.532 | 3.415  | -1.037 | -2.724 |
| H29 | -0.105 | 0.701  | 5.468  | 3.456  | -0.311 | -2.937 | -1.364 | -0.95  | 4.997 | 2.647  | 1.579  | -2.715 |
| H30 | 1.881  | 1.2    | 3.661  | 3.42   | -1.653 | -0.562 | -0.906 | -1.855 | 2.463 | 1.626  | 2.043  | -0.224 |

| Breitfussin A analog isomer 8 |             |        |        |             |        |        |             |        |        |             |        |        |
|-------------------------------|-------------|--------|--------|-------------|--------|--------|-------------|--------|--------|-------------|--------|--------|
| ATOM                          | Conformer 1 |        |        | Conformer 2 |        |        | Conformer 3 |        |        | Conformer 4 |        |        |
| C1                            | -1.553      | 2.242  | -1.485 | -1.322      | 2.282  | -1.28  | -1.218      | 1.524  | 2.022  | -1.031      | 1.602  | 1.877  |
| C2                            | -2.912      | 2.1    | -1.143 | -2.703      | 2.164  | -1.025 | -2.62       | 1.514  | 1.876  | -2.436      | 1.622  | 1.774  |
| C3                            | -3.445      | 0.934  | -0.628 | -3.301      | 0.984  | -0.628 | -3.286      | 0.647  | 1.032  | -3.15       | 0.737  | 0.99   |
| C4                            | -2.548      | -0.128 | -0.454 | -2.45       | -0.119 | -0.484 | -2.484      | -0.242 | 0.304  | -2.393      | -0.205 | 0.281  |
| C5                            | -1.175      | -0.026 | -0.781 | -1.058      | -0.045 | -0.73  | -1.074      | -0.263 | 0.418  | -0.981      | -0.261 | 0.357  |
| C6                            | -0.682      | 1.179  | -1.304 | -0.497      | 1.179  | -1.132 | -0.443      | 0.636  | 1.294  | -0.301      | 0.66   | 1.17   |
| N7                            | -2.764      | -1.391 | 0.038  | -2.735      | -1.406 | -0.102 | -2.84       | -1.201 | -0.611 | -2.803      | -1.195 | -0.577 |
| C8                            | -1.585      | -2.087 | 0.042  | -1.584      | -2.145 | -0.088 | -1.714      | -1.821 | -1.083 | -1.71       | -1.87  | -1.051 |
| C9                            | -0.577      | -1.293 | -0.45  | -0.522      | -1.356 | -0.468 | -0.601      | -1.28  | -0.484 | -0.565      | -1.337 | -0.506 |
| C10                           | 0.82        | -1.678 | -0.635 | 0.869       | -1.778 | -0.608 | 0.786       | -1.684 | -0.698 | 0.803       | -1.792 | -0.738 |
| Br11                          | -4.074      | 3.605  | -1.401 | -3.801      | 3.722  | -1.239 | -3.645      | 2.769  | 2.903  | -3.398      | 2.947  | 2.774  |
| C12                           | 2.014       | -1.146 | -0.035 | 2.054       | -1.223 | -0.011 | 1.901       | -0.927 | -1.2   | 1.95        | -1.036 | -1.168 |
| N13                           | 3.091       | -1.753 | -0.484 | 3.137       | -1.856 | -0.404 | 3.002       | -1.645 | -1.221 | 3.029       | -1.784 | -1.231 |
| O14                           | 2.651       | -2.702 | -1.392 | 2.71        | -2.837 | -1.284 | 2.659       | -2.896 | -0.736 | 2.641       | -3.051 | -0.83  |
| C15                           | 1.321       | -2.631 | -1.463 | 1.382       | -2.765 | -1.388 | 1.359       | -2.887 | -0.434 | 1.338       | -3.026 | -0.543 |
| I16                           | 0.381       | -3.898 | -2.765 | 0.475       | -4.075 | -2.673 | 0.576       | -4.605 | 0.351  | 0.51        | -4.763 | 0.149  |
| C17                           | 2.131       | -0.092 | 0.957  | 2.156       | -0.102 | 0.911  | 1.921       | 0.45   | -1.664 | 2.021       | 0.381  | -1.489 |
| N18                           | 3.36        | 0.382  | 1.343  | 1.11        | 0.291  | 1.706  | 3.104       | 1.075  | -1.971 | 0.937       | 1.081  | -1.955 |
| C19                           | 3.208       | 1.341  | 2.298  | 1.479       | 1.361  | 2.462  | 2.859       | 2.341  | -2.408 | 1.278       | 2.385  | -2.15  |
| C20                           | 1.856       | 1.492  | 2.542  | 2.79        | 1.674  | 2.15   | 1.492       | 2.544  | -2.39  | 2.608       | 2.537  | -1.8   |
| C21                           | 1.17        | 0.585  | 1.693  | 3.221       | 0.747  | 1.167  | 0.895       | 1.347  | -1.918 | 3.08        | 1.267  | -1.381 |
| H22                           | -1.191      | 3.182  | -1.887 | -0.908      | 3.235  | -1.589 | -0.75       | 2.227  | 2.702  | -0.524      | 2.323  | 2.509  |
| H23                           | -4.494      | 0.838  | -0.369 | -4.365      | 0.907  | -0.434 | -4.366      | 0.648  | 0.929  | -4.232      | 0.763  | 0.919  |
| H24                           | 0.369       | 1.285  | -1.561 | 0.57        | 1.266  | -1.323 | 0.638       | 0.642  | 1.399  | 0.783       | 0.643  | 1.243  |

|     |        |        |       |        |        |       |        |        |        |        |        |        |
|-----|--------|--------|-------|--------|--------|-------|--------|--------|--------|--------|--------|--------|
| H25 | -3.654 | -1.754 | 0.358 | -3.654 | -1.758 | 0.139 | -3.786 | -1.414 | -0.901 | -3.763 | -1.392 | -0.831 |
| H26 | -1.544 | -3.107 | 0.399 | -1.597 | -3.188 | 0.198 | -1.782 | -2.608 | -1.822 | -1.823 | -2.685 | -1.753 |
| H27 | 4.246  | 0.068  | 0.967 | 0.202  | -0.157 | 1.743 | 4.022  | 0.657  | -1.878 | 0.024  | 0.685  | -2.146 |
| H28 | 4.067  | 1.839  | 2.724 | 0.786  | 1.813  | 3.157 | 3.671  | 2.995  | -2.691 | 0.555  | 3.096  | -2.521 |
| H29 | 1.411  | 2.178  | 3.249 | 3.367  | 2.483  | 2.576 | 0.981  | 3.451  | -2.681 | 3.17   | 3.46   | -1.835 |
| H30 | 0.102  | 0.436  | 1.627 | 4.187  | 0.703  | 0.682 | -0.161 | 1.155  | -1.783 | 4.069  | 1.018  | -1.02  |

| Breitfussin A analog isomer 9 |             |        |        |             |        |        |             |        |        |             |        |        |
|-------------------------------|-------------|--------|--------|-------------|--------|--------|-------------|--------|--------|-------------|--------|--------|
| ATOM                          | Conformer 1 |        |        | Conformer 2 |        |        | Conformer 3 |        |        | Conformer 4 |        |        |
| C1                            | -4.352      | -0.325 | 0.462  | -2.136      | -1.815 | -0.18  | -4.431      | -0.236 | -0.065 | -2.114      | -1.84  | -0.222 |
| C2                            | -4.297      | -1.535 | 1.178  | -1.976      | -3.013 | 0.541  | -4.497      | -1.64  | 0.014  | -1.968      | -3.04  | 0.499  |
| C3                            | -3.11       | -2.16  | 1.506  | -0.766      | -3.412 | 1.073  | -3.374      | -2.441 | 0.094  | -0.768      | -3.443 | 1.051  |
| C4                            | -1.941      | -1.516 | 1.086  | 0.313       | -2.546 | 0.862  | -2.144      | -1.775 | 0.092  | 0.316       | -2.578 | 0.861  |
| C5                            | -1.948      | -0.299 | 0.364  | 0.199       | -1.324 | 0.155  | -2.028      | -0.366 | 0.017  | 0.214       | -1.354 | 0.157  |
| C6                            | -3.182      | 0.296  | 0.054  | -1.054      | -0.972 | -0.378 | -3.201      | 0.404  | -0.063 | -1.028      | -0.998 | -0.398 |
| N7                            | -0.63       | -1.89  | 1.265  | 1.625       | -2.69  | 1.247  | -0.874      | -2.297 | 0.158  | 1.622       | -2.724 | 1.266  |
| C8                            | 0.194       | -0.973 | 0.693  | 2.348       | -1.623 | 0.817  | 0.04        | -1.293 | 0.125  | 2.352       | -1.654 | 0.851  |
| C9                            | -0.563      | 0.032  | 0.119  | 1.523       | -0.744 | 0.143  | -0.612      | -0.078 | 0.04   | 1.537       | -0.774 | 0.168  |
| C10                           | -0.045      | 1.195  | -0.555 | 1.976       | 0.496  | -0.447 | 0.013       | 1.222  | 0.007  | 1.98        | 0.469  | -0.423 |
| Br11                          | -5.947      | -2.345 | 1.723  | -3.506      | -4.144 | 0.777  | -6.224      | -2.472 | 0.011  | -3.504      | -4.169 | 0.706  |
| C12                           | 1.224       | 1.604  | -0.891 | 1.375       | 1.695  | -0.747 | 1.315       | 1.663  | -0.034 | 1.37        | 1.67   | -0.678 |
| C13                           | 0.983       | 2.862  | -1.504 | 2.455       | 2.449  | -1.288 | 1.155       | 3.076  | -0.016 | 2.416       | 2.422  | -1.281 |
| N14                           | -0.278      | 3.19   | -1.542 | 3.579       | 1.792  | -1.316 | -0.089      | 3.46   | 0.028  | 3.536       | 1.765  | -1.376 |
| O15                           | -0.935      | 2.126  | -0.945 | 3.281       | 0.553  | -0.783 | -0.817      | 2.284  | 0.035  | 3.265       | 0.523  | -0.831 |
| I16                           | 2.398       | 4.129  | -2.294 | 2.4         | 4.393  | -1.958 | 2.669       | 4.467  | -0.07  | 2.285       | 4.364  | -1.95  |
| C17                           | 2.494       | 0.914  | -0.69  | 0.002       | 2.12   | -0.506 | 2.565       | 0.913  | -0.105 | 0.02        | 2.103  | -0.338 |
| N18                           | 2.768       | -0.283 | -1.304 | -0.587      | 1.975  | 0.724  | 3.542       | 1.065  | 0.847  | -0.87       | 2.511  | -1.299 |
| C19                           | 3.999       | -0.732 | -0.925 | -1.89       | 2.375  | 0.669  | 4.623       | 0.294  | 0.536  | -2.073      | 2.806  | -0.726 |
| C20                           | 4.539       | 0.193  | -0.053 | -2.15       | 2.796  | -0.621 | 4.344       | -0.373 | -0.64  | -1.961      | 2.586  | 0.634  |
| C21                           | 3.584       | 1.238  | 0.097  | -0.95       | 2.635  | -1.367 | 3.041       | 0.023  | -1.05  | -0.633      | 2.142  | 0.88   |
| H22                           | -5.312      | 0.123  | 0.23   | -3.107      | -1.551 | -0.583 | -5.343      | 0.346  | -0.127 | -3.078      | -1.575 | -0.643 |
| H23                           | -3.073      | -3.093 | 2.058  | -0.644      | -4.341 | 1.618  | -3.431      | -3.522 | 0.155  | -0.658      | -4.374 | 1.595  |
| H24                           | -3.234      | 1.229  | -0.497 | -1.188      | -0.056 | -0.945 | -3.16       | 1.486  | -0.123 | -1.15       | -0.08  | -0.964 |

|     |        |        |       |        |        |        |        |        |        |        |        |        |
|-----|--------|--------|-------|--------|--------|--------|--------|--------|--------|--------|--------|--------|
| H25 | -0.318 | -2.721 | 1.753 | 2      | -3.472 | 1.771  | -0.647 | -3.283 | 0.216  | 1.988  | -3.505 | 1.797  |
| H26 | 1.268  | -1.096 | 0.738 | 3.406  | -1.548 | 1.029  | 1.099  | -1.509 | 0.166  | 3.407  | -1.581 | 1.081  |
| H27 | 2.146  | -0.754 | -1.95 | -0.12  | 1.614  | 1.548  | 3.462  | 1.657  | 1.665  | -0.663 | 2.569  | -2.289 |
| H28 | 4.393  | -1.662 | -1.31 | -2.519 | 2.338  | 1.547  | 5.496  | 0.281  | 1.173  | -2.903 | 3.155  | -1.324 |
| H29 | 5.508  | 0.126  | 0.421 | -3.094 | 3.176  | -0.984 | 5.004  | -1.062 | -1.15  | -2.743 | 2.733  | 1.365  |
| H30 | 3.667  | 2.124  | 0.712 | -0.796 | 2.842  | -2.418 | 2.504  | -0.294 | -1.934 | -0.193 | 1.872  | 1.832  |



| Breitfussin A analog isomer 10 |             |        |        |             |        |        |             |        |        |             |        |        |
|--------------------------------|-------------|--------|--------|-------------|--------|--------|-------------|--------|--------|-------------|--------|--------|
| ATOM                           | Conformer 1 |        |        | Conformer 2 |        |        | Conformer 3 |        |        | Conformer 4 |        |        |
| C1                             | -2.401      | -0.855 | -1.624 | -2.424      | -0.959 | -1.676 | -3.834      | -0.356 | -0.227 | -3.146      | -0.38  | 3.377  |
| C2                             | -2.529      | -2.252 | -1.5   | -2.552      | -2.354 | -1.52  | -3.963      | -1.724 | 0.083  | -3.379      | -1.748 | 3.127  |
| C3                             | -1.502      | -3.071 | -1.073 | -1.532      | -3.16  | -1.052 | -2.943      | -2.477 | 0.632  | -2.63       | -2.493 | 2.236  |
| C4                             | -0.295      | -2.433 | -0.759 | -0.333      | -2.51  | -0.73  | -1.742      | -1.798 | 0.878  | -1.604      | -1.808 | 1.572  |
| C5                             | -0.126      | -1.032 | -0.865 | -0.164      | -1.112 | -0.868 | -1.576      | -0.422 | 0.595  | -1.346      | -0.433 | 1.785  |
| C6                             | -1.2        | -0.241 | -1.307 | -1.23       | -0.336 | -1.351 | -2.639      | 0.298  | 0.027  | -2.129      | 0.279  | 2.707  |
| N7                             | 0.889       | -2.959 | -0.307 | 0.844       | -3.023 | -0.244 | -0.558      | -2.258 | 1.397  | -0.691      | -2.262 | 0.654  |
| C8                             | 1.794       | -1.952 | -0.115 | 1.744       | -2.008 | -0.064 | 0.346       | -1.231 | 1.454  | 0.132       | -1.233 | 0.28   |
| C9                             | 1.222       | -0.744 | -0.445 | 1.174       | -0.811 | -0.431 | -0.227      | -0.081 | 0.965  | -0.223      | -0.088 | 0.952  |
| C10                            | 1.863       | 0.568  | -0.416 | 1.818       | 0.499  | -0.429 | 0.381       | 1.242  | 0.859  | 0.386       | 1.234  | 0.839  |
| Br11                           | -4.218      | -3.048 | -1.943 | -4.229      | -3.166 | -1.98  | -5.642      | -2.581 | -0.28  | -4.803      | -2.61  | 4.079  |
| C12                            | 1.493       | 1.711  | 0.25   | 1.467       | 1.652  | 0.23   | 1.45        | 1.677  | 0.117  | 1.646       | 1.668  | 1.166  |
| O13                            | 2.335       | 2.715  | -0.059 | 2.32        | 2.643  | -0.094 | 1.654       | 2.991  | 0.337  | 1.764       | 2.982  | 0.888  |
| N14                            | 3.295       | 2.264  | -0.947 | 3.272       | 2.172  | -0.983 | 0.712       | 3.471  | 1.231  | 0.571       | 3.463  | 0.374  |
| C15                            | 3.001       | 1.01   | -1.147 | 2.958       | 0.92   | -1.169 | -0.02       | 2.434  | 1.525  | -0.219      | 2.427  | 0.353  |
| C16                            | 0.437       | 2.026  | 1.18   | 0.426       | 1.98   | 1.171  | 2.341       | 1.037  | -0.819 | 2.806       | 1.028  | 1.735  |
| N17                            | -0.402      | 1.071  | 1.7    | 0.271       | 3.258  | 1.651  | 3.358       | 1.733  | -1.427 | 3.961       | 1.732  | 1.977  |
| C18                            | -1.291      | 1.655  | 2.547  | -0.765      | 3.296  | 2.531  | 4.032       | 0.913  | -2.278 | 4.891       | 0.913  | 2.535  |
| C19                            | -1.03       | 3.014  | 2.579  | -1.294      | 2.021  | 2.628  | 3.444       | -0.339 | -2.226 | 4.335       | -0.348 | 2.66   |
| C20                            | 0.065       | 3.252  | 1.714  | -0.543      | 1.184  | 1.768  | 2.374       | -0.264 | -1.302 | 3.015       | -0.279 | 2.154  |
| I21                            | 4.129       | -0.116 | -2.447 | 4.062       | -0.234 | -2.464 | -1.567      | 2.614  | 2.87   | -2.135      | 2.605  | -0.374 |
| H22                            | -3.242      | -0.262 | -1.966 | -3.26       | -0.378 | -2.049 | -4.669      | 0.181  | -0.663 | -3.763      | 0.151  | 4.093  |
| H23                            | -1.614      | -4.146 | -0.981 | -1.643      | -4.232 | -0.937 | -3.055      | -3.532 | 0.859  | -2.816      | -3.547 | 2.059  |
| H24                            | -1.095      | 0.837  | -1.396 | -1.126      | 0.74   | -1.466 | -2.529      | 1.351  | -0.215 | -1.939      | 1.331  | 2.902  |

|     |        |        |        |        |        |        |        |        |        |        |        |        |
|-----|--------|--------|--------|--------|--------|--------|--------|--------|--------|--------|--------|--------|
| H25 | 1.066  | -3.94  | -0.131 | 1.02   | -3.999 | -0.043 | -0.379 | -3.208 | 1.699  | -0.634 | -3.209 | 0.3    |
| H26 | 2.791  | -2.164 | 0.247  | 2.736  | -2.209 | 0.318  | 1.344  | -1.393 | 1.839  | 0.921  | -1.39  | -0.444 |
| H27 | -0.36  | 0.078  | 1.501  | 0.84   | 4.055  | 1.391  | 3.578  | 2.709  | -1.274 | 4.101  | 2.716  | 1.778  |
| H28 | -2.037 | 1.063  | 3.058  | -1.044 | 4.219  | 3.016  | 4.872  | 1.28   | -2.849 | 5.871  | 1.287  | 2.796  |
| H29 | -1.571 | 3.749  | 3.158  | -2.129 | 1.727  | 3.249  | 3.753  | -1.208 | -2.788 | 4.827  | -1.22  | 3.069  |
| H30 | 0.535  | 4.201  | 1.496  | -0.683 | 0.126  | 1.597  | 1.701  | -1.06  | -1.016 | 2.294  | -1.083 | 2.097  |

## Chemical Shielding Tensors of the ten isomeric breitfussin A structures

### Isomer 1 (conformer 1)

1 C Isotropic = 57.6297 Anisotropy = 143.1677

XX= 24.2615 YX= 30.0016 ZX= -36.9352

XY= 31.1471 YY= 115.5978 ZY= 66.3168

XZ= -39.6819 YZ= 66.4719 ZZ= 33.0298

Eigenvalues: -40.2691 60.0834 153.0749

2 C Isotropic = 47.3278 Anisotropy = 112.8381

XX= -33.4794 YX= -0.9408 ZX= 26.3834

XY= -2.0373 YY= 108.5921 ZY= 26.8563

XZ= 29.7177 YZ= 26.8305 ZZ= 66.8708

Eigenvalues: -41.2555 60.6856 122.5532

3 C Isotropic = 69.9599 Anisotropy = 125.0036

XX= 53.5081 YX= -5.8632 ZX= 26.9646

XY= -7.6487 YY= 122.1061 ZY= 60.5439

XZ= 30.9435 YZ= 59.9934 ZZ= 34.2656

Eigenvalues: -9.6506 66.2347 153.2957

4 C Isotropic = 47.2033 Anisotropy = 140.2436

XX= 9.8559 YX= 21.6754 ZX= -20.8061

XY= 21.8474 YY= 106.1645 ZY= 62.4382

XZ= -20.8949 YZ= 62.0715 ZZ= 25.5895

Eigenvalues: -29.4959 30.4068 140.6990

5 C Isotropic = 59.8032 Anisotropy = 159.8967

XX= -3.6428 YX= 5.7106 ZX= 15.2909

XY= 3.8478 YY= 134.1240 ZY= 60.8245

XZ= 18.3385 YZ= 60.2538 ZZ= 48.9285

Eigenvalues: -10.2847 23.2934 166.4010

6 C Isotropic = 59.0738 Anisotropy = 168.7181

XX= 40.5502 YX= 2.2505 ZX= 16.2648

XY= 3.8553 YY= 127.2676 ZY= 83.6834

XZ= 11.5218 YZ= 84.2403 ZZ= 9.4035

Eigenvalues: -35.8136 41.4824 171.5525

7 N Isotropic = 115.0016 Anisotropy = 84.4562

XX= 129.7510 YX= 4.4094 ZX= -1.5685

XY= 2.4867 YY= 143.6894 ZY= 52.4246

XZ= 3.0380 YZ= 51.8680 ZZ= 71.5645

Eigenvalues: 44.2150 129.4841 171.3057

8 C Isotropic = 61.5802 Anisotropy = 116.0855

XX= -5.1205 YX= 10.7225 ZX= 1.9860

XY= 6.0928 YY= 120.2648 ZY= 34.7722

XZ= 12.4273 YZ= 35.2978 ZZ= 69.5963

Eigenvalues: -6.0406 51.8107 138.9705

9 C Isotropic = 75.8719 Anisotropy = 108.8794

XX= 20.8006 YX= -1.8326 ZX= 23.1290

XY= 2.8656 YY= 129.1339 ZY= 36.2087

XZ= 11.3213 YZ= 36.3886 ZZ= 77.6812

Eigenvalues: 15.0946 64.0628 148.4582

10 C Isotropic = 35.0502 Anisotropy = 86.8653

XX= 53.7484 YX= 1.0027 ZX= 0.6670

XY= 1.2193 YY= 66.5121 ZY= 53.8364

XZ= 1.2978 YZ= 52.9578 ZZ= -15.1098

Eigenvalues: -41.5075 53.6978 92.9604

11 Br Isotropic = 1895.0181 Anisotropy = 1568.9165

XX= 2870.8090 YX= 37.2039 ZX= -308.5910  
 XY= 43.2962 YY= 1343.2078 ZY= -50.4895  
 XZ= -326.0561 YZ= -52.0960 ZZ= 1471.0374  
 Eigenvalues: 1320.5035 1423.5884 2940.9624  
 12 C Isotropic = 65.5552 Anisotropy = 47.4632  
 XX= 73.2261 YX= 12.1302 ZX= -23.7891  
 XY= 20.6214 YY= 74.5841 ZY= 22.3421  
 XZ= -44.1676 YZ= 21.2224 ZZ= 48.8555  
 Eigenvalues: 12.9121 86.5562 97.1974  
 13 N Isotropic = -14.3168 Anisotropy = 295.8329  
 XX= -54.8701 YX= 7.1217 ZX= 8.3732  
 XY= 16.7640 YY= 113.8848 ZY= 139.2197  
 XZ= -10.2437 YZ= 140.0924 ZZ= -101.9651  
 Eigenvalues: -170.8603 -54.9952 182.9051  
 14 C Isotropic = 29.1243 Anisotropy = 77.5056  
 XX= 26.7067 YX= -11.2528 ZX= 28.3270  
 XY= -16.4586 YY= 62.8356 ZY= 38.1658  
 XZ= 36.0319 YZ= 38.9713 ZZ= -2.1693  
 Eigenvalues: -38.8232 45.4015 80.7947  
 15 O Isotropic = 30.1059 Anisotropy = 225.5712  
 XX= -6.0237 YX= 24.2572 ZX= -30.8654  
 XY= -3.0774 YY= 128.4986 ZY= 105.5995  
 XZ= 20.1495 YZ= 103.9988 ZZ= -32.1570  
 Eigenvalues: -85.0156 -5.1533 180.4867  
 16 C Isotropic = 62.4244 Anisotropy = 99.1783  
 XX= 45.6056 YX= -8.8706 ZX= 24.5875  
 XY= -4.6073 YY= 107.2453 ZY= 44.1303  
 XZ= 16.7465 YZ= 45.1629 ZZ= 34.4223  
 Eigenvalues: 2.4387 56.2912 128.5433  
 17 N Isotropic = 97.3374 Anisotropy = 125.2887  
 XX= 10.5826 YX= 10.6410 ZX= -8.1863  
 XY= 9.3839 YY= 165.0198 ZY= 31.7114  
 XZ= -4.1520 YZ= 31.6179 ZZ= 116.4098  
 Eigenvalues: 9.2705 101.8785 180.8632  
 18 C Isotropic = 62.7973 Anisotropy = 118.2914  
 XX= 57.3899 YX= -1.8126 ZX= 10.6275  
 XY= -4.8117 YY= 112.8125 ZY= 59.6475  
 XZ= 17.0520 YZ= 59.4269 ZZ= 18.1896  
 Eigenvalues: -13.2830 60.0167 141.6583  
 19 C Isotropic = 71.5040 Anisotropy = 134.3161  
 XX= 40.2979 YX= 16.2061 ZX= -24.0438  
 XY= 16.9231 YY= 132.0682 ZY= 57.9695  
 XZ= -24.5470 YZ= 59.0597 ZZ= 42.1459  
 Eigenvalues: -5.3130 58.7769 161.0481  
 20 C Isotropic = 72.0526 Anisotropy = 138.9886  
 XX= 7.8139 YX= -2.8192 ZX= 18.9209  
 XY= -5.2526 YY= 142.1571 ZY= 46.8812  
 XZ= 22.2076 YZ= 46.9442 ZZ= 66.1868  
 Eigenvalues: -1.4528 52.8989 164.7117  
 21 I Isotropic = 3746.2597 Anisotropy = 1835.2138  
 XX= 4002.7682 YX= -466.4545 ZX= 878.2975  
 XY= -427.4958 YY= 3509.3589 ZY= -225.2620  
 XZ= 970.0781 YZ= -263.5911 ZZ= 3726.6520  
 Eigenvalues: 2906.1890 3362.8546 4969.7356  
 22 H Isotropic = 24.0893 Anisotropy = 10.4017

XX= 27.3564 YX= 1.2224 ZX= -3.8020  
 XY= 1.0545 YY= 19.5845 ZY= -3.5454  
 XZ= -3.5492 YZ= -3.6204 ZZ= 25.3269  
 Eigenvalues: 17.8243 23.4199 31.0238  
 23 H Isotropic = 24.1793 Anisotropy = 10.3747  
 XX= 30.0816 YX= -2.0844 ZX= 2.0485  
 XY= -1.7209 YY= 19.3544 ZY= -3.1205  
 XZ= 1.4678 YZ= -2.9978 ZZ= 23.1020  
 Eigenvalues: 17.5858 23.8564 31.0958  
 24 H Isotropic = 23.0377 Anisotropy = 10.7044  
 XX= 30.0716 YX= -0.9843 ZX= -0.4481  
 XY= -0.7255 YY= 16.9646 ZY= -3.4317  
 XZ= -1.1604 YZ= -3.4242 ZZ= 22.0768  
 Eigenvalues: 15.1598 23.7793 30.1740  
 25 H Isotropic = 24.0199 Anisotropy = 9.2688  
 XX= 26.5126 YX= -0.5629 ZX= -0.5995  
 XY= -0.1087 YY= 18.5250 ZY= -5.9205  
 XZ= -1.1646 YZ= -5.9934 ZZ= 27.0221  
 Eigenvalues: 15.4122 26.4484 30.1991  
 26 H Isotropic = 23.3317 Anisotropy = 13.9753  
 XX= 28.9944 YX= 2.2014 ZX= -5.7234  
 XY= 0.8039 YY= 16.9541 ZY= -4.7234  
 XZ= -3.3455 YZ= -4.9423 ZZ= 24.0467  
 Eigenvalues: 14.4664 22.8802 32.6486  
 27 H Isotropic = 22.8817 Anisotropy = 7.6226  
 XX= 27.1825 YX= -0.9159 ZX= 0.8031  
 XY= -0.9078 YY= 17.3575 ZY= -4.4456  
 XZ= 0.8110 YZ= -4.4129 ZZ= 24.1051  
 Eigenvalues: 15.1458 25.5359 27.9634  
 28 H Isotropic = 24.6761 Anisotropy = 3.4698  
 XX= 25.8951 YX= 0.1805 ZX= -0.7654  
 XY= -0.3712 YY= 22.3019 ZY= -2.2940  
 XZ= 0.2731 YZ= -2.2916 ZZ= 25.8314  
 Eigenvalues: 21.1653 25.8737 26.9893  
 29 H Isotropic = 25.1323 Anisotropy = 2.7885  
 XX= 26.1870 YX= 0.0037 ZX= -0.3881  
 XY= -0.2886 YY= 23.1278 ZY= -1.8319  
 XZ= 0.0497 YZ= -1.8904 ZZ= 26.0821  
 Eigenvalues: 22.2186 26.1870 26.9913  
 30 H Isotropic = 24.4593 Anisotropy = 5.8976  
 XX= 25.2855 YX= -0.6184 ZX= 0.6072  
 XY= -0.4403 YY= 21.4508 ZY= -3.2856  
 XZ= 0.2964 YZ= -3.3527 ZZ= 26.6414  
 Eigenvalues: 19.8185 25.1683 28.3910

## Isomer 1 (conformer 2)

1 C Isotropic = 58.3519 Anisotropy = 143.9843

XX= -3.1689 YX= -28.3088 ZX= -42.5953

XY= -30.4572 YY= 148.8593 ZY= -8.4192

XZ= -46.6294 YZ= -7.5996 ZZ= 29.3652

Eigenvalues: -38.7915 59.5057 154.3415

2 C Isotropic = 47.1007 Anisotropy = 112.4769

XX= -3.7648 YX= -22.6456 ZX= 44.6223

XY= -25.5672 YY= 117.4567 ZY= 10.1025

XZ= 48.4381 YZ= 9.5752 ZZ= 27.6103

Eigenvalues: -41.2299 60.4467 122.0853

3 C Isotropic = 70.1023 Anisotropy = 124.7718

XX= 67.7794 YX= -14.6686 ZX= 2.7845

XY= -14.3982 YY= 150.6631 ZY= 6.6255

XZ= 8.9178 YZ= 5.1955 ZZ= -8.1356

Eigenvalues: -8.8963 65.9197 153.2835

4 C Isotropic = 47.5217 Anisotropy = 141.8241

XX= -8.5190 YX= -22.9918 ZX= -27.9746

XY= -25.7626 YY= 137.9530 ZY= 0.2100

XZ= -29.4960 YZ= -0.2971 ZZ= 13.1311

Eigenvalues: -30.8306 31.3246 142.0711

5 C Isotropic = 58.0574 Anisotropy = 165.2544

XX= 6.5997 YX= -27.6404 ZX= 11.8851

XY= -27.0851 YY= 163.5940 ZY= 0.7989

XZ= 14.6181 YZ= 3.0496 ZZ= 3.9784

Eigenvalues: -10.4520 16.3971 168.2270

6 C Isotropic = 58.8575 Anisotropy = 174.5604

XX= 38.2421 YX= -23.8097 ZX= -14.4321

XY= -17.9285 YY= 172.0351 ZY= -3.9896

XZ= -16.7642 YZ= -4.4882 ZZ= -33.7048

Eigenvalues: -37.2852 38.6266 175.2311

7 N Isotropic = 114.4477 Anisotropy = 88.6505

XX= 115.7211 YX= -9.1063 ZX= -32.6237

XY= -13.2987 YY= 171.2541 ZY= -3.1660

XZ= -24.3609 YZ= -0.7312 ZZ= 56.3677

Eigenvalues: 44.6184 125.1766 173.5480

8 C Isotropic = 60.4681 Anisotropy = 116.5474

XX= -2.4532 YX= -23.1558 ZX= 19.3442

XY= -22.2683 YY= 134.4903 ZY= 2.6161

XZ= 30.7164 YZ= 7.0874 ZZ= 49.3671

Eigenvalues: -16.0497 59.2876 138.1663

9 C Isotropic = 76.4209 Anisotropy = 106.8600

XX= 40.1195 YX= -15.9421 ZX= 34.2301

XY= -12.1920 YY= 145.8174 ZY= 4.2296

XZ= 27.8263 YZ= 5.0226 ZZ= 43.3257

Eigenvalues: 9.3340 72.2677 147.6609

10 C Isotropic = 36.9120 Anisotropy = 87.0878

XX= 28.6142 YX= 41.6429 ZX= 50.2024

XY= 36.6554 YY= 68.3264 ZY= -21.5553

XZ= 52.8929 YZ= -15.1127 ZZ= 13.7954

Eigenvalues: -44.9651 60.7307 94.9705

11 Br Isotropic = 1894.4484 Anisotropy = 1581.9162

XX= 2499.7647 YX= 217.8704 ZX= -662.8583

XY= 198.3528 YY= 1353.8494 ZY= -98.2061

XZ= -677.7279 YZ= -126.6668 ZZ= 1829.7310  
 Eigenvalues: 1317.0033 1417.2827 2949.0592  
 12 C Isotropic = 57.1534 Anisotropy = 48.9703  
 XX= 34.7021 YX= 48.4708 ZX= 4.8810  
 XY= 38.9951 YY= 49.4664 ZY= -1.8503  
 XZ= 17.5190 YZ= -18.2134 ZZ= 87.2916  
 Eigenvalues: -4.7224 86.3823 89.8002  
 13 N Isotropic = -15.6088 Anisotropy = 294.7350  
 XX= -19.3039 YX= 142.7644 ZX= 81.6914  
 XY= 137.2360 YY= 50.7746 ZY= 33.5743  
 XZ= 95.8664 YZ= 10.5006 ZZ= -78.2971  
 Eigenvalues: -170.3010 -57.4066 180.8812  
 14 C Isotropic = 26.7515 Anisotropy = 85.1500  
 XX= 47.3935 YX= 14.8796 ZX= 43.1028  
 XY= 30.7183 YY= 56.0857 ZY= 0.8456  
 XZ= 36.1533 YZ= 6.5901 ZZ= -23.2247  
 Eigenvalues: -41.3718 38.1081 83.5182  
 15 O Isotropic = 16.6641 Anisotropy = 221.1635  
 XX= 20.0812 YX= 93.5929 ZX= 72.9058  
 XY= 128.5627 YY= 54.5171 ZY= -2.6108  
 XZ= 40.8565 YZ= 40.9993 ZZ= -24.6059  
 Eigenvalues: -91.8651 -22.2490 164.1065  
 16 C Isotropic = 62.2790 Anisotropy = 100.1809  
 XX= 74.6670 YX= 36.0067 ZX= 30.9599  
 XY= 33.5216 YY= 93.4466 ZY= 15.5156  
 XZ= 37.1096 YZ= 10.0803 ZZ= 18.7235  
 Eigenvalues: 2.4983 55.2725 129.0663  
 17 N Isotropic = 96.9064 Anisotropy = 126.1366  
 XX= 114.7341 YX= 62.9507 ZX= -11.8841  
 XY= 62.1751 YY= 106.3296 ZY= 51.8777  
 XZ= -14.5139 YZ= 55.4060 ZZ= 69.6554  
 Eigenvalues: 7.5648 102.1568 180.9975  
 18 C Isotropic = 62.8163 Anisotropy = 118.9230  
 XX= 66.8540 YX= 46.7676 ZX= 50.2854  
 XY= 48.0706 YY= 98.9748 ZY= 2.1559  
 XZ= 45.5246 YZ= 6.1108 ZZ= 22.6202  
 Eigenvalues: -13.1021 59.4527 142.0984  
 19 C Isotropic = 71.6177 Anisotropy = 134.7840  
 XX= 62.5549 YX= 76.8097 ZX= 26.4170  
 XY= 76.9796 YY= 87.9722 ZY= 15.1623  
 XZ= 26.6293 YZ= 13.9144 ZZ= 64.3259  
 Eigenvalues: -4.5103 57.8896 161.4737  
 20 C Isotropic = 71.8929 Anisotropy = 140.9277  
 XX= 99.0001 YX= 51.4872 ZX= 18.8796  
 XY= 55.0488 YY= 101.3857 ZY= 41.4406  
 XZ= 16.3076 YZ= 43.8633 ZZ= 15.2927  
 Eigenvalues: -2.4709 52.3048 165.8447  
 21 I Isotropic = 3790.3919 Anisotropy = 1994.7777  
 XX= 4145.2838 YX= -931.3396 ZX= 213.3184  
 XY= -931.2846 YY= 4222.1467 ZY= -15.3208  
 XZ= 129.6763 YZ= 76.9594 ZZ= 3003.7452  
 Eigenvalues: 2933.3440 3317.5881 5120.2437  
 22 H Isotropic = 24.1873 Anisotropy = 10.4687  
 XX= 24.7724 YX= 1.5572 ZX= -3.6025  
 XY= 2.0644 YY= 18.6812 ZY= -1.2333

XZ= -2.9559 YZ= -1.1545 ZZ= 29.1085  
 Eigenvalues: 18.1749 23.2207 31.1665  
 23 H Isotropic = 24.0917 Anisotropy = 9.8035  
 XX= 30.2744 YX= 2.0428 ZX= 0.5327  
 XY= 2.1493 YY= 17.9919 ZY= -0.4508  
 XZ= -0.0195 YZ= -0.3897 ZZ= 24.0088  
 Eigenvalues: 17.6115 24.0363 30.6274  
 24 H Isotropic = 23.6397 Anisotropy = 11.1375  
 XX= 27.4731 YX= 3.5868 ZX= -2.5677  
 XY= 5.0427 YY= 20.9826 ZY= -3.4128  
 XZ= -2.0131 YZ= -2.9125 ZZ= 22.4634  
 Eigenvalues: 17.9055 21.9489 31.0647  
 25 H Isotropic = 23.7989 Anisotropy = 10.0133  
 XX= 25.5690 YX= 1.1400 ZX= 1.7770  
 XY= 1.0273 YY= 15.7443 ZY= -0.8569  
 XZ= 0.9474 YZ= -0.6053 ZZ= 30.0834  
 Eigenvalues: 15.5729 25.3493 30.4744  
 26 H Isotropic = 24.1939 Anisotropy = 6.1814  
 XX= 25.2474 YX= 0.0586 ZX= 0.3084  
 XY= 0.5593 YY= 19.3020 ZY= 0.7812  
 XZ= 1.5137 YZ= -0.3083 ZZ= 28.0322  
 Eigenvalues: 19.2819 24.9850 28.3148  
 27 H Isotropic = 22.8846 Anisotropy = 7.5040  
 XX= 22.8280 YX= -5.7405 ZX= -1.5105  
 XY= -5.8133 YY= 21.1717 ZY= -2.4080  
 XZ= -1.5103 YZ= -2.1934 ZZ= 24.6541  
 Eigenvalues: 15.3622 25.4043 27.8873  
 28 H Isotropic = 24.7235 Anisotropy = 3.4463  
 XX= 24.5811 YX= -2.3968 ZX= -0.8788  
 XY= -2.1664 YY= 23.5399 ZY= -1.0073  
 XZ= -1.7425 YZ= -0.2433 ZZ= 26.0496  
 Eigenvalues: 21.3509 25.7986 27.0210  
 29 H Isotropic = 25.2414 Anisotropy = 2.7464  
 XX= 25.2402 YX= -1.9651 ZX= -0.8187  
 XY= -1.9865 YY= 24.3095 ZY= -0.6386  
 XZ= -1.0812 YZ= -0.3979 ZZ= 26.1747  
 Eigenvalues: 22.4739 26.1781 27.0724  
 30 H Isotropic = 24.6143 Anisotropy = 5.8392  
 XX= 25.3623 YX= -3.1052 ZX= -1.6824  
 XY= -3.8509 YY= 23.6113 ZY= 0.2877  
 XZ= -1.4315 YZ= -0.2628 ZZ= 24.8694  
 Eigenvalues: 20.6752 24.6607 28.5071



### Isomer 1 (conformer 3)

1 C Isotropic = 57.9614 Anisotropy = 143.1544

XX= 17.7614 YX= 18.6162 ZX= -44.8846

XY= 19.3923 YY= 140.2319 ZY= 41.4025

XZ= -48.0745 YZ= 43.0913 ZZ= 15.8909

Eigenvalues: -40.2785 60.7650 153.3977

2 C Isotropic = 47.5524 Anisotropy = 113.3946

XX= -30.1758 YX= -2.9677 ZX= 29.6994

XY= -6.1311 YY= 117.3452 ZY= 20.0703

XZ= 32.0816 YZ= 19.0864 ZZ= 55.4876

Eigenvalues: -40.8419 60.3502 123.1488

3 C Isotropic = 69.6336 Anisotropy = 125.5494

XX= 55.9076 YX= -3.1542 ZX= 23.1305

XY= -4.0638 YY= 140.6044 ZY= 42.3666

XZ= 27.6601 YZ= 41.7788 ZZ= 12.3889

Eigenvalues: -9.9646 65.5323 153.3332

4 C Isotropic = 47.2434 Anisotropy = 140.8074

XX= 5.5690 YX= 13.4297 ZX= -26.5581

XY= 12.8505 YY= 128.2702 ZY= 40.3991

XZ= -26.7645 YZ= 41.7336 ZZ= 7.8910

Eigenvalues: -29.4646 30.0798 141.1150

5 C Isotropic = 59.5066 Anisotropy = 160.1696

XX= -1.7069 YX= 3.1681 ZX= 12.6283

XY= 1.9134 YY= 153.9196 ZY= 40.7027

XZ= 16.8489 YZ= 41.5500 ZZ= 26.3071

Eigenvalues: -9.5417 21.7752 166.2863

6 C Isotropic = 60.7698 Anisotropy = 164.8981

XX= 46.0353 YX= 1.9103 ZX= 9.3423

XY= 9.1950 YY= 153.3079 ZY= 56.1794

XZ= 7.5785 YZ= 56.3664 ZZ= -17.0338

Eigenvalues: -34.4723 46.0798 170.7019

7 N Isotropic = 115.1219 Anisotropy = 84.7849

XX= 128.2786 YX= 3.3992 ZX= -8.2427

XY= -0.1012 YY= 161.3282 ZY= 33.7553

XZ= -4.9563 YZ= 35.3916 ZZ= 55.7589

Eigenvalues: 44.8903 128.8302 171.6452

8 C Isotropic = 61.0543 Anisotropy = 117.2839

XX= -7.5524 YX= 3.2651 ZX= 4.4577

XY= -2.3837 YY= 129.6473 ZY= 30.6712

XZ= 11.0641 YZ= 23.9138 ZZ= 61.0678

Eigenvalues: -8.4718 52.3910 139.2436

9 C Isotropic = 76.1682 Anisotropy = 108.2609

XX= 24.4934 YX= -1.9942 ZX= 23.2714

XY= -1.3300 YY= 140.4484 ZY= 25.8082

XZ= 14.1441 YZ= 25.4913 ZZ= 63.5629

Eigenvalues: 15.9068 64.2557 148.3422

10 C Isotropic = 36.6683 Anisotropy = 85.3295

XX= 58.1306 YX= 11.3272 ZX= 1.1131

XY= 5.9989 YY= 65.8135 ZY= 51.0027

XZ= 0.1396 YZ= 53.6477 ZZ= -13.9391

Eigenvalues: -39.9611 56.4114 93.5546

11 Br Isotropic = 1896.8298 Anisotropy = 1575.3096

XX= 2836.8913 YX= 55.3441 ZX= -382.8903

XY= 46.0210 YY= 1339.1729 ZY= -45.8253

XZ= -402.8312 YZ= -38.5293 ZZ= 1514.4253

Eigenvalues: 1327.5433 1415.9100 2947.0362

12 C Isotropic = 62.5002 Anisotropy = 52.6442

XX= 68.8486 YX= 17.9523 ZX= -23.3185

XY= 33.8478 YY= 69.1856 ZY= 11.2740

XZ= -40.1522 YZ= 29.6017 ZZ= 49.4666

Eigenvalues: 8.9066 80.9977 97.5964

13 N Isotropic = -21.5086 Anisotropy = 304.0657

XX= -45.4748 YX= 47.9127 ZX= 26.9489

XY= 64.9642 YY= 92.6257 ZY= 140.8911

XZ= 1.9101 YZ= 146.9356 ZZ= -111.6767

Eigenvalues: -187.2964 -58.4312 181.2019

14 C Isotropic = 30.0628 Anisotropy = 76.4228

XX= 35.1882 YX= -3.4323 ZX= 32.3655

XY= -3.1001 YY= 61.9839 ZY= 38.5256

XZ= 40.3309 YZ= 33.3477 ZZ= -6.9835

Eigenvalues: -38.8316 48.0088 81.0114

15 O Isotropic = 34.2821 Anisotropy = 220.7431

XX= 6.2237 YX= 53.2510 ZX= -15.7557

XY= 38.9267 YY= 120.9905 ZY= 104.5484

XZ= 32.1368 YZ= 90.4271 ZZ= -24.3677

Eigenvalues: -75.7040 -2.8938 181.4442

16 C Isotropic = 62.5950 Anisotropy = 97.6552

XX= 30.9024 YX= 34.9729 ZX= -16.4066

XY= 31.7395 YY= 99.3117 ZY= 39.2383

XZ= -10.1014 YZ= 37.8359 ZZ= 57.5708

Eigenvalues: 2.0529 58.0335 127.6984

17 N Isotropic = 99.6519 Anisotropy = 121.1623

XX= 43.0233 YX= 13.7534 ZX= 48.4956

XY= 14.1278 YY= 162.3586 ZY= 28.3800

XZ= 47.8405 YZ= 30.1167 ZZ= 93.5739

Eigenvalues: 13.8281 104.7009 180.4268

18 C Isotropic = 63.9742 Anisotropy = 115.5489

XX= 45.4266 YX= 34.3312 ZX= -15.9906

XY= 36.7802 YY= 103.9402 ZY= 54.0348

XZ= -21.5322 YZ= 54.9872 ZZ= 42.5558

Eigenvalues: -11.1092 62.0250 141.0068

19 C Isotropic = 70.8735 Anisotropy = 137.1660

XX= 61.1960 YX= 17.6028 ZX= 20.5189

XY= 17.4452 YY= 126.2999 ZY= 62.4974

XZ= 22.1026 YZ= 62.4282 ZZ= 25.1246

Eigenvalues: -6.7967 57.0998 162.3175

20 C Isotropic = 69.6052 Anisotropy = 142.6356

XX= 3.3746 YX= 36.1662 ZX= 16.5622

XY= 35.8280 YY= 134.1418 ZY= 41.4372

XZ= 15.9373 YZ= 42.2297 ZZ= 71.2994

Eigenvalues: -6.3198 50.4399 164.6956

21 I Isotropic = 3721.7838 Anisotropy = 1962.1612

XX= 3998.0559 YX= -577.7705 ZX= 772.5212

XY= -780.2420 YY= 3708.7741 ZY= -426.6798

XZ= 801.1332 YZ= -380.8779 ZZ= 3458.5215

Eigenvalues: 2886.8261 3248.6340 5029.8913

22 H Isotropic = 24.1215 Anisotropy = 10.3903

XX= 26.9503 YX= 0.7563 ZX= -4.0276

XY= 0.9168 YY= 18.7828 ZY= -2.6355

XZ= -3.5009 YZ= -2.6406 ZZ= 26.6314  
 Eigenvalues: 17.9666 23.3495 31.0484  
 23 H Isotropic = 24.1047 Anisotropy = 10.3002  
 XX= 30.3401 YX= -1.2223 ZX= 2.0501  
 XY= -1.0045 YY= 18.1656 ZY= -1.9011  
 XZ= 1.4368 YZ= -2.0432 ZZ= 23.8085  
 Eigenvalues: 17.5209 23.8217 30.9715  
 24 H Isotropic = 23.3037 Anisotropy = 10.6707  
 XX= 30.3169 YX= -0.3872 ZX= -0.7504  
 XY= 0.2635 YY= 17.0482 ZY= -3.1855  
 XZ= -0.9791 YZ= -2.6818 ZZ= 22.5459  
 Eigenvalues: 15.7657 23.7279 30.4175  
 25 H Isotropic = 24.0251 Anisotropy = 9.4198  
 XX= 26.3781 YX= -0.6089 ZX= -0.1970  
 XY= -0.5506 YY= 16.6854 ZY= -4.2004  
 XZ= -1.0088 YZ= -4.0399 ZZ= 29.0117  
 Eigenvalues: 15.3866 26.3837 30.3050  
 26 H Isotropic = 23.3784 Anisotropy = 13.0101  
 XX= 27.4072 YX= -0.7256 ZX= -6.0755  
 XY= -0.6993 YY= 15.7029 ZY= -1.4511  
 XZ= -3.5055 YZ= -2.3777 ZZ= 27.0251  
 Eigenvalues: 15.1788 22.9046 32.0518  
 27 H Isotropic = 23.0874 Anisotropy = 9.0106  
 XX= 26.1043 YX= -1.5503 ZX= -2.5762  
 XY= -1.3729 YY= 17.5974 ZY= -5.4363  
 XZ= -2.4568 YZ= -4.8389 ZZ= 25.5606  
 Eigenvalues: 14.5631 25.6047 29.0945  
 28 H Isotropic = 24.6830 Anisotropy = 3.6772  
 XX= 25.8125 YX= -1.3545 ZX= 0.2648  
 XY= -0.9292 YY= 22.4841 ZY= -2.6142  
 XZ= -0.6988 YZ= -2.2029 ZZ= 25.7525  
 Eigenvalues: 20.9528 25.9617 27.1345  
 29 H Isotropic = 25.1183 Anisotropy = 2.4675  
 XX= 26.0153 YX= -0.9012 ZX= -0.0920  
 XY= -0.7883 YY= 23.4910 ZY= -1.8760  
 XZ= -0.6126 YZ= -1.5547 ZZ= 25.8486  
 Eigenvalues: 22.3609 26.2307 26.7633  
 30 H Isotropic = 24.3218 Anisotropy = 5.5162  
 XX= 24.2777 YX= -0.7168 ZX= -0.4841  
 XY= -0.9394 YY= 22.1382 ZY= -2.8922  
 XZ= -0.1608 YZ= -2.9336 ZZ= 26.5494  
 Eigenvalues: 20.4836 24.4825 27.9993

## Isomer 1 (conformer 4)

1 C Isotropic = 58.1741 Anisotropy = 144.2846

XX= 10.1639 YX= -26.3843 ZX= -47.9463

XY= -28.0713 YY= 148.3370 ZY= 0.0214

XZ= -52.3363 YZ= 1.7391 ZZ= 16.0213

Eigenvalues: -39.1400 59.2983 154.3638

2 C Isotropic = 46.9202 Anisotropy = 113.4344

XX= -13.2437 YX= -32.2751 ZX= 35.6815

XY= -35.9981 YY= 113.1982 ZY= 17.2409

XZ= 39.2443 YZ= 16.3568 ZZ= 40.8059

Eigenvalues: -41.7517 59.9691 122.5431

3 C Isotropic = 70.2706 Anisotropy = 124.9183

XX= 66.3094 YX= -19.1239 ZX= 9.7501

XY= -19.4704 YY= 147.0616 ZY= 22.0838

XZ= 16.2416 YZ= 20.6617 ZZ= -2.5592

Eigenvalues: -8.8508 66.1132 153.5495

4 C Isotropic = 47.3865 Anisotropy = 141.4350

XX= 0.3761 YX= -23.8101 ZX= -32.1592

XY= -26.3373 YY= 135.2766 ZY= 9.9324

XZ= -33.5499 YZ= 9.9517 ZZ= 6.5067

Eigenvalues: -30.4490 30.9319 141.6765

5 C Isotropic = 57.7039 Anisotropy = 165.1827

XX= 5.2036 YX= -33.7366 ZX= 8.0213

XY= -33.6487 YY= 159.6992 ZY= 14.0539

XZ= 10.5671 YZ= 16.8006 ZZ= 8.2088

Eigenvalues: -10.3576 15.6436 167.8257

6 C Isotropic = 58.9028 Anisotropy = 175.3382

XX= 42.0429 YX= -26.3755 ZX= -7.0225

XY= -20.4490 YY= 170.3695 ZY= 15.6526

XZ= -9.5342 YZ= 14.9186 ZZ= -35.7039

Eigenvalues: -37.3882 38.3017 175.7950

7 N Isotropic = 114.7083 Anisotropy = 87.8872

XX= 122.9915 YX= -8.0637 ZX= -24.5492

XY= -13.5043 YY= 169.4212 ZY= 7.0590

XZ= -17.1965 YZ= 10.5960 ZZ= 51.7121

Eigenvalues: 45.7830 125.0421 173.2997

8 C Isotropic = 60.7396 Anisotropy = 115.2451

XX= -6.2823 YX= -29.4260 ZX= 9.4447

XY= -29.4705 YY= 130.7862 ZY= 8.3819

XZ= 19.6561 YZ= 12.9614 ZZ= 57.7149

Eigenvalues: -16.0090 60.6581 137.5696

9 C Isotropic = 76.4554 Anisotropy = 106.7029

XX= 34.5184 YX= -23.4012 ZX= 30.2841

XY= -19.6592 YY= 142.6345 ZY= 13.9007

XZ= 24.8211 YZ= 14.0218 ZZ= 52.2133

Eigenvalues: 9.4955 72.2800 147.5907

10 C Isotropic = 38.9130 Anisotropy = 84.5547

XX= 16.8044 YX= 35.4075 ZX= 53.5866

XY= 29.0134 YY= 74.0007 ZY= -10.1208

XZ= 57.8885 YZ= -4.6529 ZZ= 25.9339

Eigenvalues: -41.8055 63.2618 95.2828

11 Br Isotropic = 1889.1697 Anisotropy = 1564.6783

XX= 2620.3822 YX= 328.9091 ZX= -511.6314

XY= 334.2029 YY= 1401.7024 ZY= -142.3606

XZ= -531.4164 YZ= -147.0955 ZZ= 1645.4244  
 Eigenvalues: 1316.1910 1419.0294 2932.2885  
 12 C Isotropic = 55.1296 Anisotropy = 49.3069  
 XX= 29.6426 YX= 50.4508 ZX= 3.6399  
 XY= 38.4009 YY= 49.6155 ZY= -1.2913  
 XZ= 15.7831 YZ= -15.6487 ZZ= 86.1308  
 Eigenvalues: -7.6725 85.0605 88.0009  
 13 N Isotropic = -22.8152 Anisotropy = 304.1049  
 XX= -57.8337 YX= 134.0525 ZX= 104.7856  
 XY= 121.6980 YY= 39.5382 ZY= 64.1610  
 XZ= 124.3194 YZ= 36.4235 ZZ= -50.1501  
 Eigenvalues: -188.2755 -60.0915 179.9214  
 14 C Isotropic = 27.4240 Anisotropy = 83.2138  
 XX= 36.9451 YX= 6.6542 ZX= 50.5957  
 XY= 22.5791 YY= 54.8796 ZY= 13.8879  
 XZ= 47.5044 YZ= 16.1358 ZZ= -9.5528  
 Eigenvalues: -40.8430 40.2151 82.8998  
 15 O Isotropic = 21.6771 Anisotropy = 215.3703  
 XX= 8.0428 YX= 77.3276 ZX= 80.0218  
 XY= 115.8378 YY= 52.1255 ZY= 24.4892  
 XZ= 57.2261 YZ= 58.7333 ZZ= 4.8630  
 Eigenvalues: -81.8206 -18.4053 165.2573  
 16 C Isotropic = 62.4517 Anisotropy = 98.1697  
 XX= 51.6531 YX= 53.4344 ZX= 15.7173  
 XY= 57.0358 YY= 65.8017 ZY= 23.3364  
 XZ= 10.8060 YZ= 27.5849 ZZ= 69.9002  
 Eigenvalues: 2.2646 57.1923 127.8981  
 17 N Isotropic = 100.0530 Anisotropy = 123.3151  
 XX= 130.6756 YX= 26.9757 ZX= 25.2981  
 XY= 27.5880 YY= 119.8588 ZY= 63.1036  
 XZ= 25.8918 YZ= 61.5385 ZZ= 49.6245  
 Eigenvalues: 12.5694 105.3265 182.2631  
 18 C Isotropic = 63.9288 Anisotropy = 116.4216  
 XX= 41.0664 YX= 66.3787 ZX= 26.8628  
 XY= 64.4271 YY= 75.4229 ZY= 20.2252  
 XZ= 31.1017 YZ= 15.8846 ZZ= 75.2971  
 Eigenvalues: -11.1760 61.4192 141.5432  
 19 C Isotropic = 70.8561 Anisotropy = 136.7870  
 XX= 62.6350 YX= 45.8923 ZX= 58.2800  
 XY= 46.9125 YY= 106.5066 ZY= 26.6195  
 XZ= 57.2296 YZ= 26.8373 ZZ= 43.4266  
 Eigenvalues: -6.5480 57.0688 162.0474  
 20 C Isotropic = 69.4311 Anisotropy = 144.0895  
 XX= 81.1197 YX= 60.0727 ZX= 15.7560  
 XY= 59.3273 YY= 78.9823 ZY= 59.6229  
 XZ= 16.6119 YZ= 59.6696 ZZ= 48.1914  
 Eigenvalues: -6.9284 49.7310 165.4908  
 21 I Isotropic = 3790.3258 Anisotropy = 1984.5601  
 XX= 4173.7633 YX= -974.7420 ZX= 238.7423  
 XY= -887.0780 YY= 4186.1443 ZY= 24.5588  
 XZ= 136.3432 YZ= 145.3950 ZZ= 3011.0699  
 Eigenvalues: 2901.5863 3356.0254 5113.3659  
 22 H Isotropic = 24.1366 Anisotropy = 10.4364  
 XX= 25.4772 YX= 2.3705 ZX= -3.7138  
 XY= 2.6875 YY= 19.0999 ZY= -2.2091

XZ= -3.0354 YZ= -2.0724 ZZ= 27.8328  
 Eigenvalues: 18.1134 23.2023 31.0942  
 23 H Isotropic = 24.1425 Anisotropy = 9.7053  
 XX= 29.9745 YX= 2.2699 ZX= 1.5303  
 XY= 2.3547 YY= 18.3775 ZY= -0.6454  
 XZ= 1.0305 YZ= -0.8080 ZZ= 24.0756  
 Eigenvalues: 17.7860 24.0288 30.6127  
 24 H Isotropic = 23.5764 Anisotropy = 10.9538  
 XX= 27.6334 YX= 4.2968 ZX= -1.1673  
 XY= 5.5706 YY= 21.8175 ZY= -2.6415  
 XZ= -0.5708 YZ= -2.3656 ZZ= 21.2782  
 Eigenvalues: 17.9793 21.8709 30.8789  
 25 H Isotropic = 23.8631 Anisotropy = 9.8930  
 XX= 25.1917 YX= 1.2643 ZX= 1.3010  
 XY= 1.2533 YY= 16.3383 ZY= -2.0985  
 XZ= 0.4849 YZ= -2.0294 ZZ= 30.0592  
 Eigenvalues: 15.8317 25.2991 30.4584  
 26 H Isotropic = 24.3035 Anisotropy = 5.9807  
 XX= 25.0098 YX= 0.1133 ZX= -0.1373  
 XY= 0.4937 YY= 19.7284 ZY= -0.0024  
 XZ= 1.1697 YZ= -1.2195 ZZ= 28.1722  
 Eigenvalues: 19.6627 24.9571 28.2906  
 27 H Isotropic = 23.2795 Anisotropy = 7.4497  
 XX= 23.2018 YX= -3.8207 ZX= -3.4515  
 XY= -4.5797 YY= 20.8029 ZY= -3.0054  
 XZ= -3.4868 YZ= -3.4161 ZZ= 25.8338  
 Eigenvalues: 15.5220 26.0705 28.2460  
 28 H Isotropic = 24.7401 Anisotropy = 3.6852  
 XX= 25.3244 YX= -2.0787 ZX= -1.8302  
 XY= -2.6959 YY= 23.8318 ZY= -0.8117  
 XZ= -0.9450 YZ= -1.5344 ZZ= 25.0642  
 Eigenvalues: 21.2513 25.7721 27.1969  
 29 H Isotropic = 25.1544 Anisotropy = 2.5147  
 XX= 25.3724 YX= -1.4662 ZX= -1.3216  
 XY= -1.9065 YY= 24.5200 ZY= -0.8193  
 XZ= -0.9560 YZ= -1.0821 ZZ= 25.5709  
 Eigenvalues: 22.5139 26.1185 26.8309  
 30 H Isotropic = 24.2576 Anisotropy = 5.5745  
 XX= 25.3561 YX= -2.2679 ZX= -2.4359  
 XY= -2.0893 YY= 22.5856 ZY= -0.6909  
 XZ= -2.6394 YZ= -0.4077 ZZ= 24.8310  
 Eigenvalues: 20.5842 24.2146 27.9739

## Isomer 2 (conformer 1)

1 C Isotropic = 56.5022 Anisotropy = 145.9495

XX= -37.6459 YX= 0.0000 ZX= -21.9816

XY= 0.0000 YY= 153.8019 ZY= 0.0000

XZ= -18.1786 YZ= 0.0000 ZZ= 53.3507

Eigenvalues: -41.8800 57.5848 153.8019

2 C Isotropic = 46.4931 Anisotropy = 114.0605

XX= 56.7450 YX= 0.0000 ZX= -15.5558

XY= 0.0000 YY= 122.5334 ZY= 0.0000

XZ= -19.6673 YZ= 0.0000 ZZ= -39.7991

Eigenvalues: -42.9115 59.8574 122.5334

3 C Isotropic = 70.2674 Anisotropy = 125.2335

XX= 34.7348 YX= 0.0000 ZX= 39.4155

XY= 0.0000 YY= 153.7564 ZY= 0.0000

XZ= 34.5955 YZ= 0.0000 ZZ= 22.3109

Eigenvalues: -9.0004 66.0461 153.7564

4 C Isotropic = 46.2883 Anisotropy = 138.4198

XX= -28.1349 YX= 0.0000 ZX= -13.8366

XY= 0.0000 YY= 138.5682 ZY= 0.0000

XZ= -13.2993 YZ= 0.0000 ZZ= 28.4317

Eigenvalues: -31.2209 31.5177 138.5682

5 C Isotropic = 59.3031 Anisotropy = 164.1988

XX= 21.7415 YX= 0.0000 ZX= -0.2538

XY= 0.0000 YY= 168.7690 ZY= 0.0000

XZ= -0.3933 YZ= 0.0000 ZZ= -12.6010

Eigenvalues: -12.6041 21.7445 168.7690

6 C Isotropic = 57.8292 Anisotropy = 177.7378

XX= -17.7989 YX= 0.0000 ZX= 30.3502

XY= 0.0000 YY= 176.3211 ZY= 0.0000

XZ= 34.9423 YZ= 0.0000 ZZ= 14.9655

Eigenvalues: -37.9428 35.1094 176.3211

7 N Isotropic = 115.4866 Anisotropy = 84.7218

XX= 60.2834 YX= 0.0000 ZX= 33.3681

XY= 0.0000 YY= 171.9678 ZY= 0.0000

XZ= 21.9501 YZ= 0.0000 ZZ= 114.2086

Eigenvalues: 48.6195 125.8725 171.9678

8 C Isotropic = 62.6919 Anisotropy = 114.1345

XX= 47.3982 YX= 0.0000 ZX= -15.9548

XY= 0.0000 YY= 138.7816 ZY= 0.0000

XZ= -33.5038 YZ= 0.0000 ZZ= 1.8958

Eigenvalues: -8.9558 58.2499 138.7816

9 C Isotropic = 75.0772 Anisotropy = 106.3357

XX= 63.4964 YX= 0.0000 ZX= -9.7278

XY= 0.0000 YY= 145.9677 ZY= 0.0000

XZ= -1.6298 YZ= 0.0000 ZZ= 15.7676

Eigenvalues: 15.1012 64.1627 145.9677

10 C Isotropic = 27.8932 Anisotropy = 75.7767

XX= 40.7920 YX= 0.0000 ZX= -17.4605

XY= 0.0000 YY= 78.4110 ZY= 0.0000

XZ= -27.8314 YZ= 0.0000 ZZ= -35.5234

Eigenvalues: -41.7374 47.0060 78.4110

11 Br Isotropic = 1888.8850 Anisotropy = 1579.9278

XX= 1498.0880 YX= 0.0000 ZX= 330.4543

XY= 0.0000 YY= 1306.5173 ZY= 0.0000

XZ= 349.8414 YZ= 0.0000 ZZ= 2862.0497  
 Eigenvalues: 1306.5173 1417.9675 2942.1702  
 12 O Isotropic = 39.1253 Anisotropy = 200.4816  
 XX= -9.9388 YX= 0.0000 ZX= 63.2759  
 XY= 0.0000 YY= 172.7797 ZY= 0.0000  
 XZ= 3.9719 YZ= 0.0000 ZZ= -45.4649  
 Eigenvalues: -65.7294 10.3256 172.7797  
 13 C Isotropic = 40.0663 Anisotropy = 89.6828  
 XX= 50.9047 YX= 0.0000 ZX= 23.2787  
 XY= 0.0000 YY= 99.8549 ZY= 0.0000  
 XZ= 23.1684 YZ= 0.0000 ZZ= -30.5606  
 Eigenvalues: -36.7159 57.0600 99.8549  
 14 C Isotropic = 64.9465 Anisotropy = 40.1698  
 XX= 47.7140 YX= 0.0000 ZX= 26.0181  
 XY= 0.0000 YY= 88.9466 ZY= 0.0000  
 XZ= 50.8324 YZ= 0.0000 ZZ= 58.1790  
 Eigenvalues: 14.1666 88.9466 91.7264  
 15 N Isotropic = -28.5742 Anisotropy = 308.7738  
 XX= -87.3942 YX= 0.0000 ZX= 31.7579  
 XY= 0.0000 YY= 177.2749 ZY= 0.0000  
 XZ= 50.9641 YZ= 0.0000 ZZ= -175.6034  
 Eigenvalues: -191.9633 -71.0344 177.2749  
 16 C Isotropic = 63.1304 Anisotropy = 102.3719  
 XX= 16.1897 YX= 0.0000 ZX= -26.8155  
 XY= 0.0000 YY= 131.3783 ZY= 0.0000  
 XZ= -17.6149 YZ= 0.0000 ZZ= 41.8232  
 Eigenvalues: 3.3592 54.6537 131.3783  
 17 N Isotropic = 100.9647 Anisotropy = 114.7042  
 XX= 54.5244 YX= 0.0000 ZX= 49.3057  
 XY= 0.0000 YY= 177.4342 ZY= 0.0000  
 XZ= 40.7952 YZ= 0.0000 ZZ= 70.9355  
 Eigenvalues: 16.9383 108.5216 177.4342  
 18 C Isotropic = 65.6843 Anisotropy = 114.8346  
 XX= 25.5087 YX= 0.0000 ZX= -33.0553  
 XY= 0.0000 YY= 142.2407 ZY= 0.0000  
 XZ= -42.9428 YZ= 0.0000 ZZ= 29.3035  
 Eigenvalues: -10.6403 65.4525 142.2407  
 19 C Isotropic = 71.2908 Anisotropy = 135.5095  
 XX= 59.8399 YX= 0.0000 ZX= -4.8860  
 XY= 0.0000 YY= 161.6305 ZY= 0.0000  
 XZ= -0.2087 YZ= 0.0000 ZZ= -7.5979  
 Eigenvalues: -7.6940 59.9360 161.6305  
 20 C Isotropic = 71.8758 Anisotropy = 138.0090  
 XX= 4.5802 YX= 0.0000 ZX= 11.0005  
 XY= 0.0000 YY= 163.8818 ZY= 0.0000  
 XZ= 12.9483 YZ= 0.0000 ZZ= 47.1654  
 Eigenvalues: 1.4441 50.3015 163.8818  
 21 I Isotropic = 3670.1979 Anisotropy = 1962.9815  
 XX= 4506.4117 YX= 0.0000 ZX= -867.4320  
 XY= 0.0000 YY= 3195.1294 ZY= 0.0000  
 XZ= -908.9475 YZ= 0.0000 ZZ= 3309.0527  
 Eigenvalues: 2836.6121 3195.1294 4978.8523  
 22 H Isotropic = 24.0202 Anisotropy = 10.4828  
 XX= 23.9220 YX= 0.0000 ZX= -2.3490  
 XY= 0.0000 YY= 17.9743 ZY= 0.0000  
 XZ= -2.5435 YZ= 0.0000 ZZ= 30.1644  
 Eigenvalues: 17.9743 23.0776 31.0088



23 H Isotropic = 24.2251 Anisotropy = 10.0281  
 XX= 27.6098 YX= 0.0000 ZX= 3.1084  
 XY= 0.0000 YY= 17.8047 ZY= 0.0000  
 XZ= 3.8331 YZ= 0.0000 ZZ= 27.2609  
 Eigenvalues: 17.8047 23.9602 30.9105  
 24 H Isotropic = 22.8347 Anisotropy = 10.5517  
 XX= 23.7051 YX= 0.0000 ZX= 1.6622  
 XY= 0.0000 YY= 15.5275 ZY= 0.0000  
 XZ= 2.1766 YZ= 0.0000 ZZ= 29.2715  
 Eigenvalues: 15.5275 23.1075 29.8692  
 25 H Isotropic = 24.0353 Anisotropy = 9.4802  
 XX= 29.1953 YX= 0.0000 ZX= -2.2366  
 XY= 0.0000 YY= 15.7724 ZY= 0.0000  
 XZ= -1.6272 YZ= 0.0000 ZZ= 27.1381  
 Eigenvalues: 15.7724 25.9780 30.3554  
 26 H Isotropic = 24.0176 Anisotropy = 6.2860  
 XX= 26.5369 YX= 0.0000 ZX= -0.3652  
 XY= 0.0000 YY= 18.2783 ZY= 0.0000  
 XZ= -2.1821 YZ= 0.0000 ZZ= 27.2376  
 Eigenvalues: 18.2783 25.5662 28.2082  
 27 H Isotropic = 23.4066 Anisotropy = 7.9717  
 XX= 27.1711 YX= 0.0000 ZX= -0.8598  
 XY= 0.0000 YY= 14.8444 ZY= 0.0000  
 XZ= -0.9301 YZ= 0.0000 ZZ= 28.2043  
 Eigenvalues: 14.8444 26.6544 28.7210  
 28 H Isotropic = 24.7076 Anisotropy = 3.6674  
 XX= 26.4845 YX= 0.0000 ZX= 1.2954  
 XY= 0.0000 YY= 21.1378 ZY= 0.0000  
 XZ= 0.0244 YZ= 0.0000 ZZ= 26.5006  
 Eigenvalues: 21.1378 25.8326 27.1525  
 29 H Isotropic = 25.0900 Anisotropy = 2.9985  
 XX= 26.5048 YX= 0.0000 ZX= 0.7779  
 XY= 0.0000 YY= 22.1295 ZY= 0.0000  
 XZ= 0.2513 YZ= 0.0000 ZZ= 26.6359  
 Eigenvalues: 22.1295 26.0516 27.0890  
 30 H Isotropic = 24.2723 Anisotropy = 11.9313  
 XX= 25.9709 YX= 0.0000 ZX= 4.6793  
 XY= 0.0000 YY= 17.7182 ZY= 0.0000  
 XZ= 4.1261 YZ= 0.0000 ZZ= 29.1279  
 Eigenvalues: 17.7182 22.8723 32.2265

## Isomer 2 (conformer 2)

1 C Isotropic = 57.3171 Anisotropy = 144.4023  
XX= -39.4673 YX= -2.5848 ZX= -14.2186  
XY= -2.9705 YY= 153.5447 ZY= 0.0453  
XZ= -10.5192 YZ= 0.0746 ZZ= 57.8739  
Eigenvalues: -41.0532 59.4192 153.5853

2 C Isotropic = 47.5282 Anisotropy = 113.7603  
XX= 53.5511 YX= -0.9695 ZX= -23.4708  
XY= -0.8954 YY= 123.3559 ZY= -0.2410  
XZ= -27.2132 YZ= -0.2019 ZZ= -34.3223  
Eigenvalues: -41.1081 60.3244 123.3684

3 C Isotropic = 68.7197 Anisotropy = 126.9948  
XX= 38.9397 YX= -1.6636 ZX= 37.3446  
XY= -1.4318 YY= 153.3616 ZY= 0.5661  
XZ= 33.1640 YZ= 0.8279 ZZ= 13.8577  
Eigenvalues: -11.0327 63.8088 153.3829

4 C Isotropic = 46.5671 Anisotropy = 137.6626  
XX= -28.9297 YX= -2.1203 ZX= -7.0242  
XY= -2.1772 YY= 138.3138 ZY= 0.1980  
XZ= -6.3973 YZ= 0.2135 ZZ= 30.3171  
Eigenvalues: -29.7068 31.0659 138.3422

5 C Isotropic = 59.8536 Anisotropy = 163.6972  
XX= 21.9680 YX= -1.9246 ZX= -2.1440  
XY= -1.8422 YY= 168.9589 ZY= 0.7158  
XZ= -1.7882 YZ= 0.4317 ZZ= -11.3663  
Eigenvalues: -11.4830 22.0587 168.9850

6 C Isotropic = 61.0613 Anisotropy = 165.2417  
XX= -3.4923 YX= -2.4542 ZX= 36.3647  
XY= -2.1652 YY= 171.1895 ZY= 1.2951  
XZ= 40.7451 YZ= 0.9102 ZZ= 15.4867  
Eigenvalues: -33.7388 45.7003 171.2225

7 N Isotropic = 112.9050 Anisotropy = 89.8285  
XX= 59.1195 YX= -1.6092 ZX= 38.5190  
XY= -1.8523 YY= 172.7643 ZY= 0.4620  
XZ= 27.1633 YZ= 0.5260 ZZ= 106.8312  
Eigenvalues: 42.3603 123.5640 172.7906

8 C Isotropic = 58.6395 Anisotropy = 119.6653  
XX= 37.8552 YX= -1.2753 ZX= -22.7557  
XY= -1.4698 YY= 138.3940 ZY= 0.6382  
XZ= -35.6856 YZ= -0.0689 ZZ= -0.3308  
Eigenvalues: -16.1443 53.6463 138.4163

9 C Isotropic = 75.4502 Anisotropy = 103.8370  
XX= 63.4110 YX= -1.0108 ZX= -14.2545  
XY= -1.4699 YY= 144.6554 ZY= -0.1187  
XZ= -7.4365 YZ= 0.2699 ZZ= 18.2841  
Eigenvalues: 15.8125 65.8631 144.6748

10 C Isotropic = 27.3054 Anisotropy = 73.6412  
XX= -19.9624 YX= 0.5961 ZX= 32.8477  
XY= -0.1336 YY= 76.3983 ZY= -0.6750  
XZ= 43.3562 YZ= 0.1883 ZZ= 25.4804  
Eigenvalues: -41.6043 47.1211 76.3995

11 Br Isotropic = 1894.2209 Anisotropy = 1571.0305  
XX= 1568.5158 YX= 3.4973 ZX= 450.9757  
XY= 1.8564 YY= 1325.5648 ZY= 4.4530  
XZ= 465.6231 YZ= 5.5051 ZZ= 2788.5821  
Eigenvalues: 1325.5353 1415.5528 2941.5745

12 O Isotropic = 33.3584 Anisotropy = 216.7478  
XX= -11.7582 YX= 1.0883 ZX= -1.0124

XY= 1.5750 YY= 177.8327 ZY= 1.5436  
 XZ= 48.9511 YZ= 1.8959 ZZ= -65.9995  
 Eigenvalues: -75.0787 -2.7031 177.8569  
 13 C Isotropic = 39.2039 Anisotropy = 89.4104  
 XX= 30.8515 YX= 0.2748 ZX= 39.5147  
 XY= 0.9282 YY= 98.7969 ZY= 0.7636  
 XZ= 41.4952 YZ= 0.2549 ZZ= -12.0366  
 Eigenvalues: -36.4238 55.2248 98.8109  
 14 C Isotropic = 65.0978 Anisotropy = 38.5529  
 XX= 90.3392 YX= -0.0138 ZX= 8.1735  
 XY= -0.6854 YY= 89.9645 ZY= 1.0985  
 XZ= -17.3132 YZ= 0.2964 ZZ= 14.9898  
 Eigenvalues: 14.7076 89.7862 90.7997  
 15 N Isotropic = -24.5291 Anisotropy = 299.0726  
 XX= -88.5286 YX= 1.6974 ZX= 71.4233  
 XY= 0.9565 YY= 174.8234 ZY= 2.9642  
 XZ= 36.8677 YZ= 1.8915 ZZ= -159.8821  
 Eigenvalues: -189.0542 -59.3857 174.8526  
 16 C Isotropic = 63.0629 Anisotropy = 102.3942  
 XX= 6.5070 YX= 2.5670 ZX= -8.5155  
 XY= 2.4937 YY= 131.1865 ZY= 2.8231  
 XZ= -17.8614 YZ= 2.9643 ZZ= 51.4953  
 Eigenvalues: 2.8460 55.0171 131.3257  
 17 N Isotropic = 101.4733 Anisotropy = 111.2835  
 XX= 110.2680 YX= 1.4357 ZX= -11.4628  
 XY= 1.2052 YY= 175.4567 ZY= 5.2570  
 XZ= -2.5606 YZ= 5.6014 ZZ= 18.6952  
 Eigenvalues: 17.9684 110.7892 175.6623  
 18 C Isotropic = 65.5280 Anisotropy = 114.5865  
 XX= -10.3401 YX= 2.7251 ZX= -7.3631  
 XY= 2.8946 YY= 141.7617 ZY= 3.2554  
 XZ= 3.0651 YZ= 2.5112 ZZ= 65.1623  
 Eigenvalues: -10.4561 65.1211 141.9189  
 19 C Isotropic = 71.2451 Anisotropy = 135.6032  
 XX= 22.4825 YX= 1.0926 ZX= 35.6352  
 XY= 1.3316 YY= 161.5111 ZY= 3.5587  
 XZ= 30.5602 YZ= 3.7602 ZZ= 29.7419  
 Eigenvalues: -7.1980 59.2862 161.6473  
 20 C Isotropic = 72.2192 Anisotropy = 137.2200  
 XX= 37.6085 YX= 2.7717 ZX= -19.4180  
 XY= 3.3084 YY= 163.4975 ZY= 4.6448  
 XZ= -22.3033 YZ= 4.9817 ZZ= 15.5517  
 Eigenvalues: 2.7820 50.1764 163.6992  
 21 I Isotropic = 3716.7557 Anisotropy = 1922.8734  
 XX= 3036.1905 YX= -2.8021 ZX= 570.4025  
 XY= 9.2107 YY= 3298.7589 ZY= 7.2056  
 XZ= 629.3104 YZ= -8.2605 ZZ= 4815.3177  
 Eigenvalues: 2852.8138 3298.7820 4998.6714  
 22 H Isotropic = 24.0624 Anisotropy = 10.5530  
 XX= 23.5615 YX= 0.0675 ZX= -1.6395  
 XY= 0.0639 YY= 17.9652 ZY= -0.0109  
 XZ= -1.9898 YZ= -0.0470 ZZ= 30.6607  
 Eigenvalues: 17.9644 23.1251 31.0978  
 23 H Isotropic = 24.1059 Anisotropy = 10.1032  
 XX= 28.1334 YX= 0.1207 ZX= 3.0875  
 XY= 0.1495 YY= 17.6618 ZY= 0.0009  
 XZ= 3.7502 YZ= 0.0323 ZZ= 26.5226  
 Eigenvalues: 17.6600 23.8164 30.8414

24 H Isotropic = 23.3212 Anisotropy = 10.5083  
 XX= 24.8237 YX= 0.0426 ZX= 2.0248  
 XY= 0.0392 YY= 15.7712 ZY= 0.1065  
 XZ= 2.5659 YZ= 0.0482 ZZ= 29.3688  
 Eigenvalues: 15.7707 23.8663 30.3268  
 25 H Isotropic = 23.9009 Anisotropy = 9.3835  
 XX= 28.6974 YX= 0.1744 ZX= -2.2789  
 XY= 0.1333 YY= 15.6646 ZY= -0.0577  
 XZ= -1.7715 YZ= -0.0608 ZZ= 27.3406  
 Eigenvalues: 15.6627 25.8834 30.1565  
 26 H Isotropic = 23.6088 Anisotropy = 6.2586  
 XX= 25.6732 YX= 0.0659 ZX= -0.3436  
 XY= 0.1775 YY= 18.0713 ZY= -0.0669  
 XZ= -2.0815 YZ= -0.0622 ZZ= 27.0819  
 Eigenvalues: 18.0692 24.9761 27.7812  
 27 H Isotropic = 23.2053 Anisotropy = 9.1660  
 XX= 26.5209 YX= -0.1718 ZX= -0.9920  
 XY= -0.3365 YY= 14.0906 ZY= -0.3840  
 XZ= -0.8590 YZ= -0.3360 ZZ= 29.0046  
 Eigenvalues: 14.0757 26.2243 29.3160  
 28 H Isotropic = 24.7263 Anisotropy = 3.6390  
 XX= 27.1435 YX= -0.0637 ZX= -0.7836  
 XY= -0.1092 YY= 20.8394 ZY= -0.0707  
 XZ= 0.6103 YZ= -0.1484 ZZ= 26.1959  
 Eigenvalues: 20.8360 26.1906 27.1523  
 29 H Isotropic = 25.1040 Anisotropy = 3.0029  
 XX= 27.0935 YX= -0.0448 ZX= -0.3456  
 XY= -0.0224 YY= 21.9963 ZY= -0.1063  
 XZ= 0.1359 YZ= -0.1042 ZZ= 26.2224  
 Eigenvalues: 21.9934 26.2127 27.1060  
 30 H Isotropic = 24.2556 Anisotropy = 11.7126  
 XX= 31.8130 YX= 0.0459 ZX= -1.6480  
 XY= 0.0277 YY= 17.4933 ZY= -0.1790  
 XZ= -1.2895 YZ= -0.1329 ZZ= 23.4603  
 Eigenvalues: 17.4893 23.2134 32.0640

## Isomer 2 (conformer 3)

1 C Isotropic = 56.9299 Anisotropy = 145.2223  
XX= -39.9074 YX= 0.0000 ZX= -15.1370  
XY= 0.0000 YY= 153.7448 ZY= 0.0000  
XZ= -11.3608 YZ= 0.0000 ZZ= 56.9523  
Eigenvalues: -41.6869 58.7318 153.7448

2 C Isotropic = 47.2120 Anisotropy = 113.7135  
XX= 53.6304 YX= 0.0000 ZX= -22.9408  
XY= 0.0000 YY= 123.0210 ZY= 0.0000  
XZ= -26.5067 YZ= 0.0000 ZZ= -35.0155  
Eigenvalues: -41.4448 60.0597 123.0210

3 C Isotropic = 69.1441 Anisotropy = 126.3907  
XX= 38.6484 YX= 0.0000 ZX= 37.6384  
XY= 0.0000 YY= 153.4045 ZY= 0.0000  
XZ= 33.6215 YZ= 0.0000 ZZ= 15.3794  
Eigenvalues: -10.4675 64.4953 153.4045

4 C Isotropic = 46.4976 Anisotropy = 137.6989  
XX= -29.2788 YX= 0.0000 ZX= -8.0333  
XY= 0.0000 YY= 138.2968 ZY= 0.0000  
XZ= -7.3384 YZ= 0.0000 ZZ= 30.4748  
Eigenvalues: -30.2516 31.4475 138.2968

5 C Isotropic = 59.6747 Anisotropy = 164.3128  
XX= 22.2616 YX= 0.0000 ZX= -2.4709  
XY= 0.0000 YY= 169.2166 ZY= 0.0000  
XZ= -1.4054 YZ= 0.0000 ZZ= -12.4541  
Eigenvalues: -12.5620 22.3695 169.2166

6 C Isotropic = 59.7304 Anisotropy = 169.8394  
XX= -7.3018 YX= 0.0000 ZX= 34.2424  
XY= 0.0000 YY= 172.9567 ZY= 0.0000  
XZ= 39.0125 YZ= 0.0000 ZZ= 13.5363  
Eigenvalues: -34.9633 41.1978 172.9567

7 N Isotropic = 112.8531 Anisotropy = 89.6108  
XX= 58.2077 YX= 0.0000 ZX= 38.1413  
XY= 0.0000 YY= 172.5937 ZY= 0.0000  
XZ= 26.6045 YZ= 0.0000 ZZ= 107.7581  
Eigenvalues: 42.2175 123.7482 172.5937

8 C Isotropic = 58.7909 Anisotropy = 119.6837  
XX= 38.3386 YX= 0.0000 ZX= -22.4798  
XY= 0.0000 YY= 138.5801 ZY= 0.0000  
XZ= -35.4974 YZ= 0.0000 ZZ= -0.5459  
Eigenvalues: -16.0083 53.8011 138.5801

9 C Isotropic = 75.6978 Anisotropy = 104.1259  
XX= 63.6720 YX= 0.0000 ZX= -13.6471  
XY= 0.0000 YY= 145.1151 ZY= 0.0000  
XZ= -6.8837 YZ= 0.0000 ZZ= 18.3064  
Eigenvalues: 16.0917 65.8867 145.1151

10 C Isotropic = 25.9683 Anisotropy = 75.9175  
XX= -22.7734 YX= 0.0000 ZX= 33.3326  
XY= 0.0000 YY= 76.5800 ZY= 0.0000  
XZ= 41.3372 YZ= 0.0000 ZZ= 24.0984  
Eigenvalues: -43.4185 44.7435 76.5800

11 Br Isotropic = 1897.9319 Anisotropy = 1569.5179  
XX= 1563.3369 YX= 0.0000 ZX= 437.7084  
XY= 0.0000 YY= 1329.6002 ZY= 0.0000  
XZ= 452.3533 YZ= 0.0000 ZZ= 2800.8586  
Eigenvalues: 1329.6002 1419.9184 2944.2772

12 O Isotropic = 26.5214 Anisotropy = 219.4280  
XX= -22.6771 YX= 0.0000 ZX= 4.7565

XY= 0.0000 YY= 172.8067 ZY= 0.0000  
 XZ= 50.7424 YZ= 0.0000 ZZ= -70.5654  
 Eigenvalues: -83.2730 -9.9694 172.8067  
 13 C Isotropic = 39.0102 Anisotropy = 91.6624  
 XX= 28.3887 YX= 0.0000 ZX= 41.9746  
 XY= 0.0000 YY= 100.1185 ZY= 0.0000  
 XZ= 41.1940 YZ= 0.0000 ZZ= -11.4766  
 Eigenvalues: -37.6587 54.5707 100.1185  
 14 C Isotropic = 69.6193 Anisotropy = 49.4395  
 XX= 101.8103 YX= 0.0000 ZX= 5.4445  
 XY= 0.0000 YY= 88.6900 ZY= 0.0000  
 XZ= -21.5367 YZ= 0.0000 ZZ= 18.3575  
 Eigenvalues: 17.5888 88.6900 102.5789  
 15 N Isotropic = -20.8027 Anisotropy = 290.9513  
 XX= -84.8138 YX= 0.0000 ZX= 73.3791  
 XY= 0.0000 YY= 173.1648 ZY= 0.0000  
 XZ= 38.9648 YZ= 0.0000 ZZ= -150.7592  
 Eigenvalues: -182.9209 -52.6521 173.1648  
 16 C Isotropic = 62.5884 Anisotropy = 102.3626  
 XX= 38.1796 YX= 0.0000 ZX= 25.5240  
 XY= 0.0000 YY= 130.8301 ZY= 0.0000  
 XZ= 30.3294 YZ= 0.0000 ZZ= 18.7554  
 Eigenvalues: -1.0998 58.0348 130.8301  
 17 N Isotropic = 95.9750 Anisotropy = 129.2082  
 XX= 72.2213 YX= 0.0000 ZX= -30.2626  
 XY= 0.0000 YY= 182.1138 ZY= 0.0000  
 XZ= -36.1118 YZ= 0.0000 ZZ= 33.5898  
 Eigenvalues: 14.5065 91.3046 182.1138  
 18 C Isotropic = 64.8977 Anisotropy = 114.8865  
 XX= 20.1493 YX= 0.0000 ZX= 44.3491  
 XY= 0.0000 YY= 141.4887 ZY= 0.0000  
 XZ= 32.4672 YZ= 0.0000 ZZ= 33.0551  
 Eigenvalues: -12.3442 65.5486 141.4887  
 19 C Isotropic = 72.6442 Anisotropy = 137.0756  
 XX= -5.8839 YX= 0.0000 ZX= -5.7973  
 XY= 0.0000 YY= 164.0279 ZY= 0.0000  
 XZ= -3.4546 YZ= 0.0000 ZZ= 59.7886  
 Eigenvalues: -6.2081 60.1129 164.0279  
 20 C Isotropic = 73.6037 Anisotropy = 130.8983  
 XX= 57.9694 YX= 0.0000 ZX= -7.6927  
 XY= 0.0000 YY= 160.8692 ZY= 0.0000  
 XZ= -5.6468 YZ= 0.0000 ZZ= 1.9724  
 Eigenvalues: 1.1890 58.7529 160.8692  
 21 I Isotropic = 3779.7198 Anisotropy = 1902.5835  
 XX= 3058.1925 YX= 0.0000 ZX= 519.7144  
 XY= 0.0000 YY= 3384.8181 ZY= 0.0000  
 XZ= 580.0815 YZ= 0.0000 ZZ= 4896.1488  
 Eigenvalues: 2906.2325 3384.8181 5048.1088  
 22 H Isotropic = 24.0366 Anisotropy = 10.5565  
 XX= 23.5676 YX= 0.0000 ZX= -1.7884  
 XY= 0.0000 YY= 17.9573 ZY= 0.0000  
 XZ= -2.0446 YZ= 0.0000 ZZ= 30.5850  
 Eigenvalues: 17.9573 23.0783 31.0743  
 23 H Isotropic = 24.1475 Anisotropy = 10.1383  
 XX= 28.0898 YX= 0.0000 ZX= 3.1310  
 XY= 0.0000 YY= 17.7093 ZY= 0.0000  
 XZ= 3.7993 YZ= 0.0000 ZZ= 26.6433  
 Eigenvalues: 17.7093 23.8267 30.9063

24 H Isotropic = 23.0940 Anisotropy = 10.5054  
 XX= 24.6605 YX= 0.0000 ZX= 2.0119  
 XY= 0.0000 YY= 15.4885 ZY= 0.0000  
 XZ= 2.5683 YZ= 0.0000 ZZ= 29.1330  
 Eigenvalues: 15.4885 23.6959 30.0976  
 25 H Isotropic = 23.9281 Anisotropy = 9.3054  
 XX= 28.7064 YX= 0.0000 ZX= -2.2694  
 XY= 0.0000 YY= 15.7468 ZY= 0.0000  
 XZ= -1.7265 YZ= 0.0000 ZZ= 27.3310  
 Eigenvalues: 15.7468 25.9057 30.1317  
 26 H Isotropic = 23.6582 Anisotropy = 6.2325  
 XX= 25.6911 YX= 0.0000 ZX= -0.3667  
 XY= 0.0000 YY= 18.1710 ZY= 0.0000  
 XZ= -2.0719 YZ= 0.0000 ZZ= 27.1127  
 Eigenvalues: 18.1710 24.9905 27.8132  
 27 H Isotropic = 22.1931 Anisotropy = 17.7814  
 XX= 33.7701 YX= 0.0000 ZX= 1.2853  
 XY= 0.0000 YY= 10.0653 ZY= 0.0000  
 XZ= 2.2548 YZ= 0.0000 ZZ= 22.7438  
 Eigenvalues: 10.0653 22.4666 34.0473  
 28 H Isotropic = 24.5923 Anisotropy = 4.0027  
 XX= 27.1233 YX= 0.0000 ZX= 0.1434  
 XY= 0.0000 YY= 20.8000 ZY= 0.0000  
 XZ= -1.0231 YZ= 0.0000 ZZ= 25.8537  
 Eigenvalues: 20.8000 25.7162 27.2608  
 29 H Isotropic = 25.1236 Anisotropy = 2.6554  
 XX= 26.8623 YX= 0.0000 ZX= 0.0888  
 XY= 0.0000 YY= 22.0873 ZY= 0.0000  
 XZ= -0.3332 YZ= 0.0000 ZZ= 26.4212  
 Eigenvalues: 22.0873 26.3896 26.8938  
 30 H Isotropic = 24.4931 Anisotropy = 5.6782  
 XX= 28.1753 YX= 0.0000 ZX= -0.7190  
 XY= 0.0000 YY= 19.4069 ZY= 0.0000  
 XZ= -0.2729 YZ= 0.0000 ZZ= 25.8971  
 Eigenvalues: 19.4069 25.7938 28.2786

## Isomer 2 (conformer 4)

1 C Isotropic = 56.5703 Anisotropy = 145.8179

XX= -37.2714 YX= 0.2941 ZX= -23.0050

XY= -0.0122 YY= 153.7672 ZY= -1.1688

XZ= -19.1640 YZ= -1.2211 ZZ= 53.2151

Eigenvalues: -41.9432 57.8719 153.7822

2 C Isotropic = 46.8110 Anisotropy = 113.5066

XX= 57.7378 YX= 0.0410 ZX= -14.5036

XY= 0.0346 YY= 122.4551 ZY= -2.0946

XZ= -18.5974 YZ= -2.0161 ZZ= -39.7599

Eigenvalues: -42.5175 60.4685 122.4821

3 C Isotropic = 70.2731 Anisotropy = 125.3355

XX= 33.8913 YX= 1.0052 ZX= 39.5115

XY= 1.1936 YY= 153.8013 ZY= -1.9234

XZ= 34.6892 YZ= -1.7440 ZZ= 23.1267

Eigenvalues: -9.0070 65.9962 153.8301

4 C Isotropic = 46.3362 Anisotropy = 138.6360

XX= -27.8571 YX= 0.6466 ZX= -14.3980

XY= 0.6675 YY= 138.7413 ZY= -1.2789

XZ= -13.7476 YZ= -1.2732 ZZ= 28.1243

Eigenvalues: -31.1964 31.4447 138.7601

5 C Isotropic = 59.2016 Anisotropy = 164.3116

XX= 21.5204 YX= 0.6823 ZX= 0.2286

XY= 0.6473 YY= 168.7170 ZY= -1.9779

XZ= 0.0561 YZ= -2.0709 ZZ= -12.6328

Eigenvalues: -12.6561 21.5181 168.7426

6 C Isotropic = 58.0665 Anisotropy = 177.1955

XX= -18.0739 YX= 1.2014 ZX= 30.5013

XY= 1.4137 YY= 176.1708 ZY= -1.5358

XZ= 34.8086 YZ= -2.1673 ZZ= 16.1027

Eigenvalues: -37.8617 35.8644 176.1968

7 N Isotropic = 114.7861 Anisotropy = 86.0056

XX= 57.9742 YX= 0.8380 ZX= 32.6743

XY= 0.7565 YY= 172.1055 ZY= -1.2388

XZ= 20.9177 YZ= -0.7127 ZZ= 114.2787

Eigenvalues: 47.2506 124.9846 172.1232

8 C Isotropic = 61.3638 Anisotropy = 116.2921

XX= 46.4832 YX= 0.2879 ZX= -15.2020

XY= 0.4694 YY= 138.8764 ZY= -1.2623

XZ= -32.3063 YZ= -1.2737 ZZ= -1.2682

Eigenvalues: -11.0791 56.2786 138.8918

9 C Isotropic = 75.2521 Anisotropy = 106.3870

XX= 63.7502 YX= 0.3116 ZX= -9.4340

XY= 0.1609 YY= 146.1635 ZY= -1.1709

XZ= -1.2833 YZ= -1.3586 ZZ= 15.8426

Eigenvalues: 15.2390 64.3406 146.1768

10 C Isotropic = 26.7136 Anisotropy = 78.2967

XX= 38.7999 YX= 1.4092 ZX= -17.8998

XY= 3.2387 YY= 78.7609 ZY= -0.9748

XZ= -25.5205 YZ= 0.9124 ZZ= -37.4199

Eigenvalues: -43.1726 44.4021 78.9114

11 Br Isotropic = 1891.3090 Anisotropy = 1577.6786

XX= 1495.5547 YX= 3.7156 ZX= 313.3027

XY= 1.8255 YY= 1307.7893 ZY= 16.1650

XZ= 333.7163 YZ= 19.7449 ZZ= 2870.5828

Eigenvalues: 1307.5757 1423.2565 2943.0947

12 O Isotropic = 31.3650 Anisotropy = 203.9727

XX= -15.5139 YX= 4.9508 ZX= 59.8019



XY= 6.5370 YY= 167.1662 ZY= -2.7093  
 XZ= 4.0434 YZ= 1.0570 ZZ= -57.5573  
 Eigenvalues: -74.8075 1.5558 167.3468  
 13 C Isotropic = 39.4145 Anisotropy = 91.2474  
 XX= 49.8427 YX= 1.8128 ZX= 21.9212  
 XY= 1.5258 YY= 100.1896 ZY= -0.1912  
 XZ= 23.7831 YZ= -0.5490 ZZ= -31.7888  
 Eigenvalues: -37.7551 55.7525 100.2462  
 14 C Isotropic = 69.3162 Anisotropy = 50.1631  
 XX= 50.2817 YX= 1.6654 ZX= 28.4224  
 XY= 2.1742 YY= 87.8089 ZY= 1.3536  
 XZ= 54.5663 YZ= -2.0784 ZZ= 69.8579  
 Eigenvalues: 17.3941 87.7962 102.7582  
 15 N Isotropic = -25.0730 Anisotropy = 300.9107  
 XX= -79.9443 YX= 7.3709 ZX= 31.6924  
 XY= 8.9289 YY= 175.2738 ZY= -0.4633  
 XZ= 50.6654 YZ= -1.4628 ZZ= -170.5484  
 Eigenvalues: -186.5078 -64.2452 175.5341  
 16 C Isotropic = 62.8866 Anisotropy = 102.9316  
 XX= 55.9490 YX= -2.7309 ZX= 13.5677  
 XY= -2.1665 YY= 131.3274 ZY= 3.8733  
 XZ= 9.1213 YZ= 4.0642 ZZ= 1.3835  
 Eigenvalues: -1.0255 58.1777 131.5077  
 17 N Isotropic = 96.7317 Anisotropy = 128.4214  
 XX= 18.7849 YX= -5.4233 ZX= 14.7529  
 XY= -5.2260 YY= 182.1574 ZY= 0.7972  
 XZ= 20.9332 YZ= 2.7260 ZZ= 89.2529  
 Eigenvalues: 14.3384 93.5108 182.3460  
 18 C Isotropic = 64.4715 Anisotropy = 114.9133  
 XX= 64.8104 YX= -1.8664 ZX= -10.7610  
 XY= -2.9762 YY= 140.8323 ZY= 5.4547  
 XZ= 1.4831 YZ= 4.4869 ZZ= -12.2283  
 Eigenvalues: -12.6579 64.9919 141.0803  
 19 C Isotropic = 72.2926 Anisotropy = 136.4000  
 XX= 24.4349 YX= -2.7597 ZX= -31.1350  
 XY= -3.1187 YY= 163.0498 ZY= 3.1401  
 XZ= -34.1751 YZ= 3.0556 ZZ= 29.3930  
 Eigenvalues: -5.8350 59.4869 163.2259  
 20 C Isotropic = 74.2784 Anisotropy = 132.3582  
 XX= 23.4268 YX= -4.5372 ZX= 28.4596  
 XY= -4.8963 YY= 162.2890 ZY= 3.0947  
 XZ= 25.6655 YZ= 4.4634 ZZ= 37.1192  
 Eigenvalues: 2.1299 58.1881 162.5171  
 21 I Isotropic = 3738.1896 Anisotropy = 1951.9011  
 XX= 4536.4800 YX= -32.7116 ZX= -885.2203  
 XY= -75.2940 YY= 3294.8390 ZY= 33.3670  
 XZ= -934.2862 YZ= 44.1179 ZZ= 3383.2500  
 Eigenvalues: 2882.6162 3292.4957 5039.4570  
 22 H Isotropic = 24.0416 Anisotropy = 10.4539  
 XX= 24.0073 YX= -0.0671 ZX= -2.3998  
 XY= -0.0291 YY= 18.0046 ZY= 0.1884  
 XZ= -2.6076 YZ= 0.1524 ZZ= 30.1131  
 Eigenvalues: 18.0021 23.1119 31.0109  
 23 H Isotropic = 24.2399 Anisotropy = 10.0223  
 XX= 27.5308 YX= -0.0046 ZX= 3.1281  
 XY= 0.0245 YY= 17.8470 ZY= 0.0840  
 XZ= 3.8388 YZ= 0.1005 ZZ= 27.3420  
 Eigenvalues: 17.8460 23.9523 30.9215

24 H Isotropic = 22.9167 Anisotropy = 10.4991  
 XX= 23.7273 YX= -0.0504 ZX= 1.6531  
 XY= -0.0283 YY= 15.6861 ZY= 0.2299  
 XZ= 2.1264 YZ= 0.1615 ZZ= 29.3367  
 Eigenvalues: 15.6827 23.1513 29.9161  
 25 H Isotropic = 24.0071 Anisotropy = 9.4455  
 XX= 29.1878 YX= -0.0885 ZX= -2.1992  
 XY= -0.0778 YY= 15.7913 ZY= 0.0956  
 XZ= -1.6146 YZ= 0.1179 ZZ= 27.0422  
 Eigenvalues: 15.7900 25.9273 30.3041  
 26 H Isotropic = 23.9177 Anisotropy = 6.2250  
 XX= 26.4662 YX= -0.0443 ZX= -0.3138  
 XY= -0.0146 YY= 18.2010 ZY= 0.0951  
 XZ= -2.1927 YZ= 0.0679 ZZ= 27.0858  
 Eigenvalues: 18.2002 25.4851 28.0677  
 27 H Isotropic = 22.2261 Anisotropy = 17.6690  
 XX= 29.4123 YX= -0.3598 ZX= 6.3527  
 XY= 0.0531 YY= 10.6539 ZY= -0.9361  
 XZ= 5.2626 YZ= -0.8387 ZZ= 26.6123  
 Eigenvalues: 10.6030 22.0699 34.0055  
 28 H Isotropic = 24.7331 Anisotropy = 4.0082  
 XX= 26.1394 YX= 0.0786 ZX= 0.0051  
 XY= -0.0349 YY= 20.9955 ZY= -0.1529  
 XZ= 1.3024 YZ= -0.1531 ZZ= 27.0645  
 Eigenvalues: 20.9913 25.8028 27.4053  
 29 H Isotropic = 25.2076 Anisotropy = 2.6861  
 XX= 26.5323 YX= 0.0559 ZX= 0.1282  
 XY= 0.0294 YY= 22.3753 ZY= -0.1028  
 XZ= 0.5971 YZ= -0.0985 ZZ= 26.7150  
 Eigenvalues: 22.3723 26.2521 26.9983  
 30 H Isotropic = 24.7678 Anisotropy = 5.7414  
 XX= 26.7734 YX= 0.0698 ZX= 1.7328  
 XY= 0.2198 YY= 20.1852 ZY= 0.0202  
 XZ= 1.2851 YZ= -0.0823 ZZ= 27.3448  
 Eigenvalues: 20.1814 25.5266 28.5954

### Isomer 3 (conformer 1)

1 C Isotropic = 58.3732 Anisotropy = 142.7849

XX= 2.8113 YX= 35.6547 ZX= 43.8245

XY= 38.2708 YY= 39.7773 ZY= -41.5848

XZ= 42.9336 YZ= -39.5323 ZZ= 132.5310

Eigenvalues: -39.8508 61.4073 153.5631

2 C Isotropic = 47.5605 Anisotropy = 111.0675

XX= -7.3379 YX= -49.4208 ZX= 13.8003

XY= -51.8803 YY= 35.1272 ZY= -13.8809

XZ= 11.5031 YZ= -14.3549 ZZ= 114.8921

Eigenvalues: -41.0745 62.1504 121.6055

3 C Isotropic = 70.8149 Anisotropy = 123.0722

XX= 69.9350 YX= -13.5147 ZX= 14.4985

XY= -17.8368 YY= 4.8608 ZY= -39.6495

XZ= 12.7420 YZ= -41.9697 ZZ= 137.6489

Eigenvalues: -8.3732 67.9548 152.8631

4 C Isotropic = 47.0363 Anisotropy = 141.4355

XX= -2.8981 YX= 17.4428 ZX= 37.4795

XY= 18.0988 YY= 22.3656 ZY= -39.3974

XZ= 37.3849 YZ= -38.0683 ZZ= 121.6414

Eigenvalues: -29.8277 29.6100 141.3267

5 C Isotropic = 56.6692 Anisotropy = 165.0984

XX= 8.7345 YX= -21.1826 ZX= 28.8425

XY= -23.7027 YY= 12.4976 ZY= -39.1171

XZ= 29.3803 YZ= -39.8498 ZZ= 148.7753

Eigenvalues: -12.1644 15.4371 166.7348

6 C Isotropic = 58.8983 Anisotropy = 172.5117

XX= 45.9074 YX= 0.8005 ZX= 28.9864

XY= 1.5363 YY= -19.1932 ZY= -56.2600

XZ= 35.7749 YZ= -54.5684 ZZ= 149.9805

Eigenvalues: -37.1025 39.8912 173.9061

7 N Isotropic = 116.5993 Anisotropy = 83.6093

XX= 122.8495 YX= 21.6417 ZX= 16.2535

XY= 16.6330 YY= 66.4187 ZY= -34.4097

XZ= 11.3615 YZ= -32.2654 ZZ= 160.5298

Eigenvalues: 48.9599 128.4993 172.3389

8 C Isotropic = 60.8396 Anisotropy = 117.6032

XX= 0.0533 YX= -26.9016 ZX= 22.4281

XY= -31.0744 YY= 54.6820 ZY= -18.5605

XZ= 19.0409 YZ= -24.0747 ZZ= 127.7834

Eigenvalues: -13.3140 56.5910 139.2417

9 C Isotropic = 74.1015 Anisotropy = 112.6218

XX= 37.2711 YX= -33.7324 ZX= 14.6443

XY= -26.7984 YY= 46.1312 ZY= -23.8378

XZ= 18.4599 YZ= -21.7269 ZZ= 138.9021

Eigenvalues: 11.0642 62.0575 149.1827

10 Br Isotropic = 1892.3011 Anisotropy = 1566.3861

XX= 2537.7418 YX= 654.1385 ZX= -74.1187

XY= 679.1287 YY= 1808.2287 ZY= -5.9323

XZ= -87.6843 YZ= -22.2770 ZZ= 1330.9328

Eigenvalues: 1318.3326 1422.0121 2936.5585

11 C Isotropic = 38.6289 Anisotropy = 105.6737

XX= 70.4835 YX= -10.1932 ZX= 30.0554

XY= -13.0041 YY= -9.1752 ZY= -53.2161

XZ= 22.3528 YZ= -60.8477 ZZ= 54.5783

Eigenvalues: -42.7333 49.5419 109.0780

12 C Isotropic = 65.9702 Anisotropy = 85.6317

XX= 77.8930 YX= 46.3850 ZX= 25.4265

XY= 39.3475 YY= 80.9055 ZY= -32.0540  
 XZ= 33.0256 YZ= -3.8812 ZZ= 39.1122  
 Eigenvalues: 4.0566 70.7960 123.0580  
 13 O Isotropic = 22.3935 Anisotropy = 187.0886  
 XX= 55.7803 YX= -72.5078 ZX= 35.0765  
 XY= -49.9654 YY= -49.2379 ZY= -72.2334  
 XZ= 67.3491 YZ= -48.5308 ZZ= 60.6380  
 Eigenvalues: -86.9319 6.9932 147.1192  
 14 C Isotropic = 22.7256 Anisotropy = 84.7024  
 XX= 28.4138 YX= -2.2762 ZX= 42.8033  
 XY= 7.4098 YY= 23.7901 ZY= -39.3926  
 XZ= 51.7163 YZ= -30.6025 ZZ= 15.9730  
 Eigenvalues: -38.8694 27.8524 79.1939  
 15 N Isotropic = -6.9714 Anisotropy = 322.8780  
 XX= 46.6387 YX= -43.4631 ZX= 111.3168  
 XY= -61.2755 YY= -101.2071 ZY= -123.3713  
 XZ= 113.3313 YZ= -139.9989 ZZ= 33.6543  
 Eigenvalues: -182.8071 -46.3876 208.2806  
 16 I Isotropic = 3694.8078 Anisotropy = 2074.4287  
 XX= 3808.2998 YX= -454.3049 ZX= -752.7268  
 XY= -360.2641 YY= 2937.4880 ZY= 210.9434  
 XZ= -1020.4052 YZ= 202.1779 ZZ= 4338.6356  
 Eigenvalues: 2757.1750 3249.4881 5077.7603  
 17 N Isotropic = 97.9892 Anisotropy = 124.3770  
 XX= 82.8032 YX= -62.5556 ZX= 49.9329  
 XY= -59.5336 YY= 78.7897 ZY= -6.3493  
 XZ= 52.5084 YZ= -4.6723 ZZ= 132.3747  
 Eigenvalues: 10.5452 102.5152 180.9072  
 18 C Isotropic = 62.3929 Anisotropy = 99.8389  
 XX= 66.0041 YX= -3.2619 ZX= 53.4768  
 XY= -8.8064 YY= 57.9650 ZY= -33.1662  
 XZ= 49.9903 YZ= -37.7927 ZZ= 63.2095  
 Eigenvalues: 3.3135 54.9129 128.9521  
 19 C Isotropic = 70.7724 Anisotropy = 142.0082  
 XX= 57.3829 YX= -37.1846 ZX= 72.8438  
 XY= -34.7303 YY= 66.3591 ZY= -26.3649  
 XZ= 73.1840 YZ= -23.0029 ZZ= 88.5752  
 Eigenvalues: -4.2945 51.1672 165.4446  
 20 C Isotropic = 71.2678 Anisotropy = 135.7057  
 XX= 92.6960 YX= -35.7270 ZX= 39.7303  
 XY= -36.3591 YY= 21.1297 ZY= -48.5015  
 XZ= 38.9528 YZ= -48.8666 ZZ= 99.9775  
 Eigenvalues: -5.2235 57.2886 161.7382  
 21 C Isotropic = 62.9539 Anisotropy = 118.6729  
 XX= 79.2876 YX= -4.1070 ZX= 52.3866  
 XY= 0.7198 YY= 45.2445 ZY= -55.6954  
 XZ= 55.8071 YZ= -51.1557 ZZ= 64.3294  
 Eigenvalues: -13.7570 60.5495 142.0691  
 22 H Isotropic = 24.1708 Anisotropy = 10.2069  
 XX= 25.0127 YX= 3.8794 ZX= -0.5840  
 XY= 3.1957 YY= 28.5177 ZY= 2.3909  
 XZ= -0.4525 YZ= 2.3660 ZZ= 18.9821  
 Eigenvalues: 18.1272 23.4099 30.9754  
 23 H Isotropic = 24.1232 Anisotropy = 10.3471  
 XX= 30.3190 YX= 0.1046 ZX= -3.0304  
 XY= 0.5203 YY= 23.3793 ZY= 1.6303  
 XZ= -2.8533 YZ= 1.8767 ZZ= 18.6713  
 Eigenvalues: 17.4382 23.9101 31.0213

24 H Isotropic = 23.1374 Anisotropy = 10.7739  
 XX= 29.1409 YX= 3.0739 ZX= -2.4175  
 XY= 2.6611 YY= 22.6694 ZY= 2.0869  
 XZ= -1.6661 YZ= 2.8576 ZZ= 17.6019  
 Eigenvalues: 15.9043 23.1879 30.3200

25 H Isotropic = 23.9271 Anisotropy = 9.4200  
 XX= 25.3467 YX= -0.1492 ZX= -2.7072  
 XY= 0.7056 YY= 29.1164 ZY= 3.6288  
 XZ= -2.4291 YZ= 3.7062 ZZ= 17.3181  
 Eigenvalues: 15.6048 25.9693 30.2071

26 H Isotropic = 23.8210 Anisotropy = 11.0560  
 XX= 23.8110 YX= 4.0799 ZX= -2.6087  
 XY= 1.9722 YY= 29.8992 ZY= 0.8268  
 XZ= -1.8988 YZ= -0.6036 ZZ= 17.7528  
 Eigenvalues: 16.9127 23.3587 31.1917

27 H Isotropic = 22.8366 Anisotropy = 8.2844  
 XX= 22.5823 YX= 3.9187 ZX= -4.0173  
 XY= 3.8743 YY= 25.6545 ZY= 2.9747  
 XZ= -4.0222 YZ= 3.7240 ZZ= 20.2729  
 Eigenvalues: 14.8817 25.2684 28.3595

28 H Isotropic = 24.4751 Anisotropy = 5.9650  
 XX= 23.1115 YX= 1.1163 ZX= -1.5331  
 XY= 0.9425 YY= 26.9010 ZY= 2.8866  
 XZ= -1.7758 YZ= 2.6993 ZZ= 23.4127  
 Eigenvalues: 20.4437 24.5298 28.4517

29 H Isotropic = 25.1869 Anisotropy = 2.6727  
 XX= 24.9571 YX= 0.6381 ZX= -1.7985  
 XY= 0.9627 YY= 26.0577 ZY= 1.2830  
 XZ= -1.5339 YZ= 1.6150 ZZ= 24.5458  
 Eigenvalues: 22.3604 26.2315 26.9687

30 H Isotropic = 24.6724 Anisotropy = 3.4245  
 XX= 24.3512 YX= 0.5060 ZX= -2.3425  
 XY= 1.4123 YY= 25.6371 ZY= 1.3801  
 XZ= -1.9366 YZ= 2.3200 ZZ= 24.0290  
 Eigenvalues: 21.1362 25.9257 26.9555

### Isomer 3 (conformer 2)

1 C Isotropic = 59.0721 Anisotropy = 142.9679

XX= 24.6506 YX= 43.9568 ZX= 13.3187

XY= 47.9028 YY= 11.7131 ZY= -45.2399

XZ= 13.7719 YZ= -42.6258 ZZ= 140.8526

Eigenvalues: -38.2601 61.0924 154.3840

2 C Isotropic = 47.7737 Anisotropy = 111.2550

XX= -33.1325 YX= -23.6539 ZX= -7.6848

XY= -24.7349 YY= 61.3309 ZY= -19.6897

XZ= -13.4649 YZ= -20.8498 ZZ= 115.1228

Eigenvalues: -40.4476 61.8251 121.9437

3 C Isotropic = 70.2546 Anisotropy = 124.2649

XX= 53.5240 YX= -24.2132 ZX= -8.3946

XY= -29.1462 YY= 20.3261 ZY= -45.5495

XZ= -10.3329 YZ= -47.1609 ZZ= 136.9136

Eigenvalues: -8.7055 66.3714 153.0979

4 C Isotropic = 47.3786 Anisotropy = 141.6666

XX= 8.0682 YX= 26.6687 ZX= 10.7566

XY= 28.7784 YY= 9.3212 ZY= -48.1358

XZ= 8.1369 YZ= -46.9940 ZZ= 124.7463

Eigenvalues: -30.1779 30.4906 141.8229

5 C Isotropic = 58.1336 Anisotropy = 164.9929

XX= -4.8625 YX= -8.2683 ZX= -3.4413

XY= -11.1476 YY= 26.6263 ZY= -45.7520

XZ= -1.8989 YZ= -47.8836 ZZ= 152.6369

Eigenvalues: -9.7135 15.9854 168.1288

6 C Isotropic = 59.2506 Anisotropy = 173.0274

XX= 38.9256 YX= -8.9035 ZX= -1.9351

XY= -9.3807 YY= -16.7593 ZY= -58.6673

XZ= 5.5229 YZ= -61.4709 ZZ= 155.5854

Eigenvalues: -36.5185 39.6681 174.6022

7 N Isotropic = 115.8934 Anisotropy = 86.1885

XX= 127.6417 YX= 7.2241 ZX= 2.5419

XY= 0.8494 YY= 60.2476 ZY= -39.5600

XZ= -3.6714 YZ= -38.5257 ZZ= 159.7910

Eigenvalues: 46.5986 127.7293 173.3524

8 C Isotropic = 60.3994 Anisotropy = 115.0133

XX= -16.6248 YX= 1.5107 ZX= 1.7690

XY= -10.0212 YY= 68.7069 ZY= -22.8704

XZ= 0.6835 YZ= -23.6461 ZZ= 129.1160

Eigenvalues: -16.8365 60.9597 137.0749

9 C Isotropic = 73.3397 Anisotropy = 112.7402

XX= 14.2664 YX= -23.3326 ZX= -5.9254

XY= -18.2513 YY= 65.2285 ZY= -27.8682

XZ= -3.8845 YZ= -23.6153 ZZ= 140.5243

Eigenvalues: 5.4805 66.0389 148.4999

10 Br Isotropic = 1902.8070 Anisotropy = 1576.1315

XX= 2884.6164 YX= 292.9046 ZX= 96.6274

XY= 307.5245 YY= 1475.0676 ZY= 50.8292

XZ= 106.7773 YZ= 61.6923 ZZ= 1348.7371

Eigenvalues: 1327.1705 1427.6893 2953.5613

11 C Isotropic = 38.8285 Anisotropy = 105.0445

XX= 11.9508 YX= -65.4953 ZX= 29.0618

XY= -67.7319 YY= 41.5670 ZY= -11.7280

XZ= 31.1657 YZ= -2.9255 ZZ= 62.9678

Eigenvalues: -44.9314 52.5588 108.8582

12 C Isotropic = 60.7278 Anisotropy = 77.1436

XX= 41.8446 YX= 0.4736 ZX= 52.0830

XY= 0.6488 YY= 92.5648 ZY= 27.5768  
 XZ= 42.0511 YZ= 22.4249 ZZ= 47.7740  
 Eigenvalues: -5.3096 75.3361 112.1569  
 13 O Isotropic = 16.6824 Anisotropy = 190.2427  
 XX= 3.1118 YX= -97.5193 ZX= 39.9596  
 XY= -104.8483 YY= 24.3867 ZY= -31.8873  
 XZ= 12.5734 YZ= -76.7001 ZZ= 22.5486  
 Eigenvalues: -90.8993 -2.5645 143.5109  
 14 C Isotropic = 22.6608 Anisotropy = 86.4855  
 XX= 13.5854 YX= -23.7186 ZX= 50.4931  
 XY= -28.2769 YY= 50.9514 ZY= -4.1206  
 XZ= 42.5845 YZ= -18.0812 ZZ= 3.4457  
 Eigenvalues: -39.2992 26.9639 80.3178  
 15 N Isotropic = -12.8548 Anisotropy = 310.4865  
 XX= -43.3478 YX= -149.2374 ZX= 82.2260  
 XY= -156.3473 YY= 12.9898 ZY= -60.8227  
 XZ= 111.9576 YZ= -46.4007 ZZ= -8.2063  
 Eigenvalues: -182.0943 -50.6062 194.1362  
 16 I Isotropic = 3701.6263 Anisotropy = 2065.9302  
 XX= 3618.8424 YX= -211.4629 ZX= -933.4304  
 XY= -231.2537 YY= 2960.7031 ZY= -120.4529  
 XZ= -864.3217 YZ= -111.5821 ZZ= 4525.3333  
 Eigenvalues: 2758.2178 3267.7480 5078.9131  
 17 N Isotropic = 98.1072 Anisotropy = 124.9296  
 XX= 127.7148 YX= -39.5591 ZX= 10.5307  
 XY= -43.5155 YY= 96.4986 ZY= -67.0027  
 XZ= 9.1758 YZ= -69.7379 ZZ= 70.1080  
 Eigenvalues: 10.3550 102.5729 181.3935  
 18 C Isotropic = 62.4760 Anisotropy = 100.6553  
 XX= 56.2788 YX= -34.6768 ZX= 42.7940  
 XY= -30.2126 YY= 87.5330 ZY= -22.2446  
 XZ= 48.0895 YZ= -17.5286 ZZ= 43.6161  
 Eigenvalues: 3.4899 54.3585 129.5795  
 19 C Isotropic = 71.2512 Anisotropy = 142.3407  
 XX= 86.6617 YX= -38.1287 ZX= 44.8613  
 XY= -38.5940 YY= 93.7200 ZY= -55.0821  
 XZ= 41.1246 YZ= -57.0952 ZZ= 33.3718  
 Eigenvalues: -4.4958 52.1043 166.1450  
 20 C Isotropic = 71.6906 Anisotropy = 135.3089  
 XX= 59.8601 YX= -72.0171 ZX= 24.8691  
 XY= -71.3419 YY= 74.3894 ZY= -35.7447  
 XZ= 24.6538 YZ= -35.0861 ZZ= 80.8224  
 Eigenvalues: -5.3156 58.4909 161.8966  
 21 C Isotropic = 63.2693 Anisotropy = 118.2511  
 XX= 44.0767 YX= -45.9720 ZX= 56.6592  
 XY= -49.7335 YY= 91.0761 ZY= -10.8164  
 XZ= 51.9124 YZ= -15.8755 ZZ= 54.6552  
 Eigenvalues: -13.0493 60.7538 142.1034  
 22 H Isotropic = 24.1598 Anisotropy = 10.5783  
 XX= 27.6775 YX= 3.8954 ZX= 1.9187  
 XY= 3.0934 YY= 25.5810 ZY= 2.7571  
 XZ= 2.2500 YZ= 2.8006 ZZ= 19.2210  
 Eigenvalues: 18.1098 23.1576 31.2121  
 23 H Isotropic = 24.1196 Anisotropy = 9.7883  
 XX= 29.8304 YX= -2.3056 ZX= -0.7285  
 XY= -1.8202 YY= 23.9566 ZY= 2.4360  
 XZ= -0.6173 YZ= 2.3721 ZZ= 18.5717  
 Eigenvalues: 17.6537 24.0600 30.6451

24 H Isotropic = 23.6836 Anisotropy = 11.1711  
 XX= 29.6806 YX= -0.3248 ZX= 3.1835  
 XY= -1.2345 YY= 20.2851 ZY= 1.8050  
 XZ= 4.4480 YZ= 1.7435 ZZ= 21.0850  
 Eigenvalues: 17.9974 21.9223 31.1310

25 H Isotropic = 24.1467 Anisotropy = 10.1893  
 XX= 25.5563 YX= -0.0599 ZX= -0.3114  
 XY= 0.8202 YY= 28.8621 ZY= 4.9962  
 XZ= -0.2242 YZ= 5.3300 ZZ= 18.0216  
 Eigenvalues: 15.9403 25.5602 30.9396

26 H Isotropic = 24.2429 Anisotropy = 6.0820  
 XX= 24.9341 YX= 0.8644 ZX= -0.5841  
 XY= 0.0362 YY= 27.2540 ZY= 3.4660  
 XZ= -0.5652 YZ= 2.1763 ZZ= 20.5407  
 Eigenvalues: 19.4251 25.0061 28.2976

27 H Isotropic = 22.9797 Anisotropy = 7.4174  
 XX= 22.7711 YX= 4.7297 ZX= -2.1243  
 XY= 4.8497 YY= 22.5852 ZY= 4.0662  
 XZ= -2.8062 YZ= 3.8678 ZZ= 23.5829  
 Eigenvalues: 15.3403 25.6742 27.9247

28 H Isotropic = 24.4874 Anisotropy = 6.0355  
 XX= 25.8340 YX= 3.2476 ZX= -1.6589  
 XY= 3.3722 YY= 24.1295 ZY= 0.7229  
 XZ= -1.4978 YZ= 1.0068 ZZ= 23.4987  
 Eigenvalues: 20.6017 24.3495 28.5111

29 H Isotropic = 25.1641 Anisotropy = 2.6135  
 XX= 25.4774 YX= 1.7801 ZX= -1.0657  
 XY= 1.4967 YY= 24.7295 ZY= 1.2983  
 XZ= -1.4638 YZ= 0.8279 ZZ= 25.2853  
 Eigenvalues: 22.4796 26.1062 26.9064

30 H Isotropic = 24.7270 Anisotropy = 3.4468  
 XX= 25.0911 YX= 2.3099 ZX= -1.2489  
 XY= 1.7245 YY= 24.0202 ZY= 1.6654  
 XZ= -2.2533 YZ= 0.8342 ZZ= 25.0696  
 Eigenvalues: 21.3171 25.8390 27.0248



### Isomer 3 (conformer 3)

1 C Isotropic = 58.3684 Anisotropy = 142.8612

XX= 12.4764 YX= 34.5919 ZX= 41.0526

XY= 37.2144 YY= 40.5251 ZY= -56.3690

XZ= 41.3439 YZ= -54.5894 ZZ= 122.1038

Eigenvalues: -39.2969 60.7929 153.6092

2 C Isotropic = 47.6339 Anisotropy = 110.9693

XX= -19.8615 YX= -43.0433 ZX= 7.3404

XY= -45.8771 YY= 51.6464 ZY= -22.1564

XZ= 4.2328 YZ= -22.1442 ZZ= 111.1168

Eigenvalues: -41.2886 62.5769 121.6134

3 C Isotropic = 70.7238 Anisotropy = 123.2343

XX= 64.6201 YX= -21.4129 ZX= 6.7291

XY= -25.6040 YY= 20.1247 ZY= -54.0052

XZ= 4.2745 YZ= -55.7818 ZZ= 127.4265

Eigenvalues: -8.3061 67.5974 152.8800

4 C Isotropic = 46.9822 Anisotropy = 141.8194

XX= 1.5962 YX= 17.3155 ZX= 33.5629

XY= 17.5753 YY= 27.5595 ZY= -53.8858

XZ= 33.3254 YZ= -53.0615 ZZ= 111.7908

Eigenvalues: -30.2354 29.6536 141.5284

5 C Isotropic = 57.0836 Anisotropy = 165.1024

XX= 2.6608 YX= -22.9195 ZX= 19.8019

XY= -25.3206 YY= 29.8058 ZY= -55.4059

XZ= 20.1025 YZ= -56.5901 ZZ= 138.7844

Eigenvalues: -12.7778 16.8769 167.1519

6 C Isotropic = 58.4380 Anisotropy = 174.3798

XX= 42.5296 YX= -9.4283 ZX= 20.3647

XY= -8.3368 YY= -3.2501 ZY= -76.2404

XZ= 27.0599 YZ= -76.7903 ZZ= 136.0346

Eigenvalues: -37.0990 37.7219 174.6912

7 N Isotropic = 117.0942 Anisotropy = 83.2537

XX= 127.6745 YX= 12.7341 ZX= 12.7472

XY= 8.3311 YY= 71.1633 ZY= -46.1323

XZ= 7.8920 YZ= -42.6043 ZZ= 152.4448

Eigenvalues: 49.2030 129.4829 172.5966

8 C Isotropic = 60.8920 Anisotropy = 117.7174

XX= -5.8547 YX= -19.5869 ZX= 16.8346

XY= -25.4277 YY= 66.3268 ZY= -28.3528

XZ= 12.1162 YZ= -33.3013 ZZ= 122.2039

Eigenvalues: -12.5406 55.8463 139.3703

9 C Isotropic = 73.9781 Anisotropy = 113.3115

XX= 28.4389 YX= -33.5953 ZX= 6.4361

XY= -25.9487 YY= 61.1950 ZY= -34.2294

XZ= 11.7002 YZ= -34.5169 ZZ= 132.3002

Eigenvalues: 9.9467 62.4684 149.5190

10 Br Isotropic = 1906.7642 Anisotropy = 1563.5366

XX= 2712.2820 YX= 540.2855 ZX= -21.6310

XY= 564.3236 YY= 1660.9153 ZY= 37.8992

XZ= -22.8861 YZ= 26.1766 ZZ= 1347.0952

Eigenvalues: 1331.3182 1439.8524 2949.1219

11 C Isotropic = 38.1763 Anisotropy = 106.1867

XX= 62.9529 YX= -22.0220 ZX= 19.7760

XY= -23.7423 YY= 5.6033 ZY= -63.2766

XZ= 12.5893 YZ= -65.8331 ZZ= 45.9728

Eigenvalues: -42.6295 48.1911 108.9674

12 C Isotropic = 69.6714 Anisotropy = 90.1715

XX= 91.5691 YX= 47.2430 ZX= 27.9209

XY= 37.3453 YY= 77.6163 ZY= -27.2083  
 XZ= 34.4029 YZ= -4.5549 ZZ= 39.8288  
 Eigenvalues: 7.7020 71.5265 129.7857  
 13 O Isotropic = 27.3626 Anisotropy = 182.2416  
 XX= 36.6781 YX= -80.7682 ZX= 18.3807  
 XY= -65.0704 YY= -8.6287 ZY= -81.5924  
 XZ= 48.2620 YZ= -68.4646 ZZ= 54.0383  
 Eigenvalues: -78.4736 11.7044 148.8570  
 14 C Isotropic = 22.7642 Anisotropy = 82.7851  
 XX= 25.5017 YX= -4.1181 ZX= 37.1417  
 XY= 3.9171 YY= 32.3217 ZY= -41.6155  
 XZ= 47.2648 YZ= -36.4526 ZZ= 10.4691  
 Eigenvalues: -38.6736 29.0119 77.9542  
 15 N Isotropic = -14.1762 Anisotropy = 330.9499  
 XX= 21.0610 YX= -60.5131 ZX= 89.8142  
 XY= -86.1912 YY= -65.4858 ZY= -155.8096  
 XZ= 83.1522 YZ= -175.2160 ZZ= 1.8962  
 Eigenvalues: -200.7255 -48.2601 206.4571  
 16 I Isotropic = 3699.9393 Anisotropy = 2105.7734  
 XX= 3759.4935 YX= -512.1786 ZX= -830.9952  
 XY= -394.4700 YY= 3033.9872 ZY= 195.7656  
 XZ= -1048.4998 YZ= 208.3960 ZZ= 4306.3372  
 Eigenvalues: 2755.6314 3240.3982 5103.7883  
 17 N Isotropic = 99.0191 Anisotropy = 124.2753  
 XX= 57.8639 YX= -30.1122 ZX= 68.6342  
 XY= -30.6867 YY= 127.4230 ZY= -22.0317  
 XZ= 66.9653 YZ= -23.5223 ZZ= 111.7703  
 Eigenvalues: 10.4435 104.7445 181.8693  
 18 C Isotropic = 61.6463 Anisotropy = 98.2467  
 XX= 59.4512 YX= -44.7293 ZX= 14.1687  
 XY= -40.3037 YY= 42.2148 ZY= -40.2721  
 XZ= 17.5794 YZ= -36.4867 ZZ= 83.2730  
 Eigenvalues: 1.6908 56.1041 127.1441  
 19 C Isotropic = 70.1625 Anisotropy = 143.0213  
 XX= 40.9664 YX= -54.7361 ZX= 48.7815  
 XY= -55.8908 YY= 70.8242 ZY= -36.2955  
 XZ= 48.7542 YZ= -36.0734 ZZ= 98.6970  
 Eigenvalues: -5.1222 50.0997 165.5101  
 20 C Isotropic = 70.7408 Anisotropy = 136.1889  
 XX= 76.1407 YX= -15.7715 ZX= 51.4088  
 XY= -15.7450 YY= 67.7474 ZY= -65.8651  
 XZ= 53.1474 YZ= -63.9869 ZZ= 68.3344  
 Eigenvalues: -6.8454 57.5345 161.5334  
 21 C Isotropic = 63.6378 Anisotropy = 116.7187  
 XX= 74.8121 YX= -38.4249 ZX= 18.4517  
 XY= -41.9956 YY= 35.0911 ZY= -56.6001  
 XZ= 14.7043 YZ= -59.3830 ZZ= 81.0102  
 Eigenvalues: -11.7981 61.2612 141.4503  
 22 H Isotropic = 24.1662 Anisotropy = 10.1752  
 XX= 25.9430 YX= 4.0719 ZX= 0.1547  
 XY= 3.5633 YY= 26.9597 ZY= 3.3793  
 XZ= 0.2323 YZ= 3.3238 ZZ= 19.5960  
 Eigenvalues: 18.0807 23.4683 30.9497  
 23 H Isotropic = 24.1594 Anisotropy = 10.3435  
 XX= 30.3531 YX= -0.5442 ZX= -2.8518  
 XY= -0.1618 YY= 22.9057 ZY= 2.4173  
 XZ= -2.4277 YZ= 2.7301 ZZ= 19.2193  
 Eigenvalues: 17.5142 23.9089 31.0551

24 H Isotropic = 23.0386 Anisotropy = 10.4819  
 XX= 29.5032 YX= 2.2365 ZX= -1.8519  
 XY= 1.8050 YY= 21.5496 ZY= 2.8873  
 XZ= -1.0079 YZ= 3.4945 ZZ= 18.0629  
 Eigenvalues: 15.7937 23.2955 30.0265  
 25 H Isotropic = 23.9581 Anisotropy = 9.2195  
 XX= 25.5614 YX= 0.5587 ZX= -2.1012  
 XY= 1.3343 YY= 27.9394 ZY= 4.9795  
 XZ= -1.7373 YZ= 5.0915 ZZ= 18.3734  
 Eigenvalues: 15.7461 26.0237 30.1044  
 26 H Isotropic = 23.8701 Anisotropy = 11.2381  
 XX= 25.0652 YX= 5.4420 ZX= -1.8711  
 XY= 2.8099 YY= 28.6399 ZY= 2.2477  
 XZ= -1.5719 YZ= 0.9960 ZZ= 17.9052  
 Eigenvalues: 16.8993 23.3489 31.3622  
 27 H Isotropic = 23.0907 Anisotropy = 7.7985  
 XX= 24.0490 YX= 2.4478 ZX= -4.4595  
 XY= 2.4036 YY= 22.9465 ZY= 4.8037  
 XZ= -4.5100 YZ= 4.8100 ZZ= 22.2768  
 Eigenvalues: 15.0478 25.9347 28.2897  
 28 H Isotropic = 24.2151 Anisotropy = 5.5650  
 XX= 23.7268 YX= 0.9820 ZX= -1.7008  
 XY= 1.0789 YY= 24.7103 ZY= 3.0723  
 XZ= -1.4257 YZ= 3.7893 ZZ= 24.2083  
 Eigenvalues: 20.0809 24.6393 27.9251  
 29 H Isotropic = 25.0606 Anisotropy = 2.5089  
 XX= 25.1980 YX= 1.2183 ZX= -1.1129  
 XY= 0.9729 YY= 25.3777 ZY= 1.8091  
 XZ= -1.4419 YZ= 1.5768 ZZ= 24.6059  
 Eigenvalues: 22.2844 26.1641 26.7332  
 30 H Isotropic = 24.6698 Anisotropy = 3.6712  
 XX= 24.6929 YX= 1.8092 ZX= -1.0110  
 XY= 1.0989 YY= 25.2665 ZY= 2.6059  
 XZ= -1.7056 YZ= 2.0282 ZZ= 24.0501  
 Eigenvalues: 21.1646 25.7277 27.1173

### Isomer 3 (conformer 4)

1 C Isotropic = 59.1885 Anisotropy = 142.5448

XX= 13.1217 YX= 45.6734 ZX= 15.0466

XY= 49.5948 YY= 17.0467 ZY= -31.6754

XZ= 14.0555 YZ= -28.9148 ZZ= 147.3971

Eigenvalues: -37.9747 61.3218 154.2184

2 C Isotropic = 48.1225 Anisotropy = 111.0331

XX= -25.4823 YX= -35.0139 ZX= -1.8692

XY= -36.7707 YY= 51.1070 ZY= -14.4861

XZ= -7.2545 YZ= -16.2407 ZZ= 118.7428

Eigenvalues: -40.2943 62.5173 122.1446

3 C Isotropic = 70.2648 Anisotropy = 124.6259

XX= 59.6340 YX= -19.2834 ZX= -0.4572

XY= -24.4880 YY= 6.6813 ZY= -34.4355

XZ= -1.3384 YZ= -36.8168 ZZ= 144.4792

Eigenvalues: -8.7422 66.1880 153.3487

4 C Isotropic = 47.2940 Anisotropy = 141.6302

XX= 1.0922 YX= 26.7269 ZX= 14.4110

XY= 28.4016 YY= 8.7577 ZY= -35.6398

XZ= 11.5866 YZ= -35.2348 ZZ= 132.0322

Eigenvalues: -29.8875 30.0555 141.7142

5 C Isotropic = 58.3564 Anisotropy = 165.5843

XX= -1.9531 YX= -11.5619 ZX= 3.9078

XY= -14.5565 YY= 16.3079 ZY= -33.2248

XZ= 6.3919 YZ= -35.0596 ZZ= 160.7145

Eigenvalues: -9.6685 15.9919 168.7459

6 C Isotropic = 59.7075 Anisotropy = 172.5697

XX= 41.0467 YX= -1.8151 ZX= 5.8444

XY= -1.0717 YY= -27.2541 ZY= -41.5229

XZ= 14.1213 YZ= -41.9997 ZZ= 165.3300

Eigenvalues: -35.9249 40.2935 174.7540

7 N Isotropic = 115.4158 Anisotropy = 87.3781

XX= 124.9826 YX= 16.1880 ZX= 6.1620

XY= 9.4499 YY= 54.9876 ZY= -29.5704

XZ= 0.0165 YZ= -29.6608 ZZ= 166.2773

Eigenvalues: 45.4123 127.1673 173.6679

8 C Isotropic = 59.7925 Anisotropy = 115.3847

XX= -14.6933 YX= -8.7261 ZX= 5.6801

XY= -20.1931 YY= 61.7188 ZY= -16.5785

XZ= 6.2433 YZ= -17.1515 ZZ= 132.3520

Eigenvalues: -17.3928 60.0547 136.7157

9 C Isotropic = 73.1765 Anisotropy = 112.1055

XX= 19.7109 YX= -29.1228 ZX= 0.0017

XY= -24.4200 YY= 55.6827 ZY= -20.2619

XZ= 0.8898 YZ= -15.7273 ZZ= 144.1358

Eigenvalues: 4.9630 66.6529 147.9135

10 Br Isotropic = 1910.1485 Anisotropy = 1566.6842

XX= 2790.8019 YX= 461.6684 ZX= 47.7468

XY= 475.8424 YY= 1585.6838 ZY= 39.4288

XZ= 65.0841 YZ= 54.5932 ZZ= 1353.9600

Eigenvalues: 1342.7037 1433.1373 2954.6047

11 C Isotropic = 37.1852 Anisotropy = 106.3085

XX= 28.4724 YX= -65.2451 ZX= 34.9636

XY= -67.3875 YY= 21.9684 ZY= -5.1860

XZ= 37.7207 YZ= 4.5772 ZZ= 61.1146

Eigenvalues: -47.1546 50.6526 108.0575

12 C Isotropic = 63.3178 Anisotropy = 80.5600

XX= 44.6199 YX= -1.0989 ZX= 47.9802

XY= 0.9390 YY= 100.8336 ZY= 30.1033  
 XZ= 39.4869 YZ= 24.6390 ZZ= 44.5000  
 Eigenvalues: -2.9573 75.8863 117.0245  
 13 O Isotropic = 22.2961 Anisotropy = 185.6809  
 XX= 35.3456 YX= -92.6196 ZX= 46.3427  
 XY= -97.0037 YY= -2.5207 ZY= -27.4416  
 XZ= 30.6160 YZ= -69.7840 ZZ= 34.0632  
 Eigenvalues: -82.0588 2.8636 146.0834  
 14 C Isotropic = 23.0790 Anisotropy = 84.8257  
 XX= 21.3758 YX= -23.0440 ZX= 51.8614  
 XY= -26.1179 YY= 44.0684 ZY= -1.8666  
 XZ= 47.0052 YZ= -14.8484 ZZ= 3.7929  
 Eigenvalues: -38.7664 28.3740 79.6295  
 15 N Isotropic = -20.5601 Anisotropy = 319.3671  
 XX= -14.6540 YX= -153.5446 ZX= 103.0303  
 XY= -153.4217 YY= -39.0629 ZY= -47.2997  
 XZ= 136.1190 YZ= -23.8688 ZZ= -7.9634  
 Eigenvalues: -200.4388 -53.5928 192.3513  
 16 I Isotropic = 3739.7700 Anisotropy = 2026.3922  
 XX= 3704.0699 YX= -192.4811 ZX= -870.6328  
 XY= -252.7309 YY= 2938.2220 ZY= -137.7389  
 XZ= -816.6689 YZ= -75.9050 ZZ= 4577.0181  
 Eigenvalues: 2788.0359 3340.5760 5090.6981  
 17 N Isotropic = 98.8848 Anisotropy = 124.6581  
 XX= 128.8332 YX= -16.4557 ZX= 51.2524  
 XY= -14.4372 YY= 110.9565 ZY= -55.7116  
 XZ= 52.2238 YZ= -55.2943 ZZ= 56.8646  
 Eigenvalues: 10.2122 104.4520 181.9902  
 18 C Isotropic = 62.0256 Anisotropy = 98.8744  
 XX= 74.4685 YX= -47.7014 ZX= 19.4362  
 XY= -50.9732 YY= 39.1056 ZY= -27.5610  
 XZ= 15.7441 YZ= -32.7315 ZZ= 72.5026  
 Eigenvalues: 0.9851 57.1499 127.9418  
 19 C Isotropic = 70.3634 Anisotropy = 142.9155  
 XX= 101.9324 YX= -43.3127 ZX= 36.7079  
 XY= -44.6590 YY= 54.7519 ZY= -59.4296  
 XZ= 37.9143 YZ= -58.7202 ZZ= 54.4059  
 Eigenvalues: -4.7690 50.2187 165.6404  
 20 C Isotropic = 70.9729 Anisotropy = 137.0254  
 XX= 70.0882 YX= -50.8406 ZX= 65.2875  
 XY= -52.9327 YY= 81.9938 ZY= -16.6794  
 XZ= 64.3435 YZ= -17.3690 ZZ= 60.8367  
 Eigenvalues: -6.9038 57.4993 162.3231  
 21 C Isotropic = 63.5974 Anisotropy = 117.0599  
 XX= 66.4291 YX= -66.6124 ZX= 26.9420  
 XY= -63.4465 YY= 42.0534 ZY= -23.0647  
 XZ= 30.1708 YZ= -19.2495 ZZ= 82.3098  
 Eigenvalues: -11.9657 61.1206 141.6374  
 22 H Isotropic = 24.1766 Anisotropy = 10.5410  
 XX= 26.8170 YX= 4.1439 ZX= 1.1531  
 XY= 3.3889 YY= 27.0006 ZY= 2.3047  
 XZ= 1.5326 YZ= 2.2349 ZZ= 18.7123  
 Eigenvalues: 18.1122 23.2137 31.2039  
 23 H Isotropic = 24.1183 Anisotropy = 9.8295  
 XX= 30.2563 YX= -1.6355 ZX= -0.9489  
 XY= -1.1335 YY= 23.9365 ZY= 1.8770  
 XZ= -0.8023 YZ= 1.7792 ZZ= 18.1622  
 Eigenvalues: 17.6152 24.0685 30.6713

24 H Isotropic = 23.7069 Anisotropy = 11.0420  
 XX= 29.7818 YX= 1.1105 ZX= 2.7448  
 XY= 0.3629 YY= 20.7556 ZY= 2.1249  
 XZ= 3.9577 YZ= 2.3674 ZZ= 20.5833  
 Eigenvalues: 18.0607 21.9917 31.0682

25 H Isotropic = 23.9734 Anisotropy = 9.9341  
 XX= 25.3885 YX= -0.5075 ZX= -0.8558  
 XY= 0.3599 YY= 29.4189 ZY= 3.7609  
 XZ= -0.8633 YZ= 4.1372 ZZ= 17.1127  
 Eigenvalues: 15.8864 25.4377 30.5961

26 H Isotropic = 24.2134 Anisotropy = 5.9241  
 XX= 24.9473 YX= 0.4735 ZX= -1.0507  
 XY= -0.5050 YY= 27.6024 ZY= 2.7011  
 XZ= -0.8208 YZ= 1.4709 ZZ= 20.0905  
 Eigenvalues: 19.4032 25.0742 28.1628

27 H Isotropic = 23.1230 Anisotropy = 7.8313  
 XX= 22.4373 YX= 3.9438 ZX= -4.8856  
 XY= 3.9877 YY= 22.7580 ZY= 2.6435  
 XZ= -4.8995 YZ= 2.7543 ZZ= 24.1737  
 Eigenvalues: 15.2820 25.7431 28.3439

28 H Isotropic = 24.3454 Anisotropy = 5.4492  
 XX= 24.7171 YX= 2.6024 ZX= -2.4125  
 XY= 2.4253 YY= 24.1690 ZY= 0.6087  
 XZ= -3.0290 YZ= 0.1705 ZZ= 24.1503  
 Eigenvalues: 20.5093 24.5488 27.9783

29 H Isotropic = 25.1064 Anisotropy = 2.4265  
 XX= 24.8465 YX= 1.3254 ZX= -1.5827  
 XY= 1.6807 YY= 25.3190 ZY= 0.8052  
 XZ= -1.3904 YZ= 1.0114 ZZ= 25.1536  
 Eigenvalues: 22.4567 26.1384 26.7240

30 H Isotropic = 24.7285 Anisotropy = 3.5759  
 XX= 24.5361 YX= 1.8825 ZX= -2.0178  
 XY= 2.4975 YY= 25.1333 ZY= 0.7036  
 XZ= -1.4335 YZ= 1.4074 ZZ= 24.5161  
 Eigenvalues: 21.3574 25.7157 27.1124

### Isomer 4 (conformer 1)

1 C Isotropic = 56.6364 Anisotropy = 145.8454

XX= -39.6511 YX= 0.0000 ZX= 16.9782

XY= 0.0000 YY= 153.8667 ZY= 0.0000

XZ= 13.6741 YZ= 0.0000 ZZ= 55.6937

Eigenvalues: -42.0541 58.0967 153.8667

2 C Isotropic = 47.1693 Anisotropy = 114.1488

XX= 54.9859 YX= 0.0000 ZX= 20.4861

XY= 0.0000 YY= 123.2684 ZY= 0.0000

XZ= 24.4574 YZ= 0.0000 ZZ= -36.7466

Eigenvalues: -41.9557 60.1950 123.2684

3 C Isotropic = 69.5756 Anisotropy = 126.2057

XX= 37.6170 YX= 0.0000 ZX= -38.0604

XY= 0.0000 YY= 153.7127 ZY= 0.0000

XZ= -33.8760 YZ= 0.0000 ZZ= 17.3970

Eigenvalues: -9.8551 64.8691 153.7127

4 C Isotropic = 46.6691 Anisotropy = 137.6021

XX= -28.5098 YX= 0.0000 ZX= 9.9574

XY= 0.0000 YY= 138.4039 ZY= 0.0000

XZ= 9.3511 YZ= 0.0000 ZZ= 30.1133

Eigenvalues: -30.0588 31.6623 138.4039

5 C Isotropic = 59.4380 Anisotropy = 164.3463

XX= 21.5176 YX= 0.0000 ZX= 2.2959

XY= 0.0000 YY= 169.0022 ZY= 0.0000

XZ= 1.3514 YZ= 0.0000 ZZ= -12.2058

Eigenvalues: -12.3042 21.6160 169.0022

6 C Isotropic = 59.5391 Anisotropy = 171.7668

XX= -10.3936 YX= 0.0000 ZX= -33.2850

XY= 0.0000 YY= 174.0504 ZY= 0.0000

XZ= -37.9216 YZ= 0.0000 ZZ= 14.9606

Eigenvalues: -35.5094 40.0764 174.0504

7 N Isotropic = 113.3594 Anisotropy = 89.0829

XX= 58.0664 YX= 0.0000 ZX= -36.5655

XY= 0.0000 YY= 172.7480 ZY= 0.0000

XZ= -26.2334 YZ= 0.0000 ZZ= 109.2638

Eigenvalues: 43.1532 124.1771 172.7480

8 C Isotropic = 59.9728 Anisotropy = 117.7678

XX= 41.4399 YX= 0.0000 ZX= 20.5093

XY= 0.0000 YY= 138.4846 ZY= 0.0000

XZ= 34.3201 YZ= 0.0000 ZZ= -0.0062

Eigenvalues: -13.6489 55.0827 138.4846

9 C Isotropic = 75.3678 Anisotropy = 105.4496

XX= 63.9419 YX= 0.0000 ZX= 12.9572

XY= 0.0000 YY= 145.6675 ZY= 0.0000

XZ= 6.4353 YZ= 0.0000 ZZ= 16.4938

Eigenvalues: 14.5888 65.8469 145.6675

10 C Isotropic = 19.6296 Anisotropy = 84.1921

XX= -23.9687 YX= 0.0000 ZX= -20.5086

XY= 0.0000 YY= 75.7576 ZY= 0.0000

XZ= -33.0164 YZ= 0.0000 ZZ= 7.0998

Eigenvalues: -39.3787 22.5098 75.7576

11 Br Isotropic = 1893.0501 Anisotropy = 1574.0629

XX= 1538.5744 YX= 0.0000 ZX= -404.9429

XY= 0.0000 YY= 1319.8455 ZY= 0.0000

XZ= -421.7170 YZ= 0.0000 ZZ= 2820.7303

Eigenvalues: 1319.8455 1416.8794 2942.4253

12 N Isotropic = -2.3899 Anisotropy = 309.7346

XX= -58.9136 YX= 0.0000 ZX= -63.3256

XY= 0.0000 YY= 204.0998 ZY= 0.0000  
 XZ= -34.3231 YZ= 0.0000 ZZ= -152.3560  
 Eigenvalues: -173.2121 -38.0575 204.0998  
 13 C Isotropic = 42.3812 Anisotropy = 105.9744  
 XX= 44.2463 YX= 0.0000 ZX= -27.8292  
 XY= 0.0000 YY= 113.0307 ZY= 0.0000  
 XZ= -18.3775 YZ= 0.0000 ZZ= -30.1335  
 Eigenvalues: -36.7255 50.8382 113.0307  
 14 C Isotropic = 67.9294 Anisotropy = 71.3328  
 XX= 42.6363 YX= 0.0000 ZX= -41.3140  
 XY= 0.0000 YY= 77.1965 ZY= 0.0000  
 XZ= -54.5371 YZ= 0.0000 ZZ= 83.9553  
 Eigenvalues: 11.1070 77.1965 115.4846  
 15 O Isotropic = 11.2900 Anisotropy = 189.0476  
 XX= -4.5694 YX= 0.0000 ZX= 27.3618  
 XY= 0.0000 YY= 137.3217 ZY= 0.0000  
 XZ= -6.0133 YZ= 0.0000 ZZ= -98.8824  
 Eigenvalues: -100.0754 -3.3764 137.3217  
 16 C Isotropic = 60.8576 Anisotropy = 105.3384  
 XX= 20.0723 YX= 0.0000 ZX= 31.0923  
 XY= 0.0000 YY= 131.0832 ZY= 0.0000  
 XZ= 21.8552 YZ= 0.0000 ZZ= 31.4174  
 Eigenvalues: -1.3298 52.8195 131.0832  
 17 N Isotropic = 94.8953 Anisotropy = 125.3185  
 XX= 35.3111 YX= 0.0000 ZX= -45.5928  
 XY= 0.0000 YY= 178.4409 ZY= 0.0000  
 XZ= -39.4169 YZ= 0.0000 ZZ= 70.9337  
 Eigenvalues: 7.0365 99.2083 178.4409  
 18 C Isotropic = 66.0229 Anisotropy = 116.4733  
 XX= 34.6693 YX= 0.0000 ZX= 32.1658  
 XY= 0.0000 YY= 143.6717 ZY= 0.0000  
 XZ= 42.0976 YZ= 0.0000 ZZ= 19.7276  
 Eigenvalues: -10.6774 65.0743 143.6717  
 19 C Isotropic = 71.9524 Anisotropy = 133.2865  
 XX= 61.4068 YX= 0.0000 ZX= -4.4145  
 XY= 0.0000 YY= 160.8101 ZY= 0.0000  
 XZ= -8.9048 YZ= 0.0000 ZZ= -6.3596  
 Eigenvalues: -7.0079 62.0550 160.8101  
 20 C Isotropic = 73.8995 Anisotropy = 138.1672  
 XX= 1.6318 YX= 0.0000 ZX= -3.5196  
 XY= 0.0000 YY= 166.0109 ZY= 0.0000  
 XZ= -5.1178 YZ= 0.0000 ZZ= 54.0556  
 Eigenvalues: 1.2785 54.4090 166.0109  
 21 I Isotropic = 3663.1528 Anisotropy = 1983.2448  
 XX= 4765.3997 YX= 0.0000 ZX= 691.2500  
 XY= 0.0000 YY= 3278.0006 ZY= 0.0000  
 XZ= 648.1024 YZ= 0.0000 ZZ= 2946.0582  
 Eigenvalues: 2726.1419 3278.0006 4985.3161  
 22 H Isotropic = 24.0248 Anisotropy = 10.6849  
 XX= 23.5641 YX= 0.0000 ZX= 1.9678  
 XY= 0.0000 YY= 17.9376 ZY= 0.0000  
 XZ= 2.2099 YZ= 0.0000 ZZ= 30.5727  
 Eigenvalues: 17.9376 22.9888 31.1481  
 23 H Isotropic = 24.1816 Anisotropy = 10.0145  
 XX= 27.9435 YX= 0.0000 ZX= -3.0585  
 XY= 0.0000 YY= 17.7582 ZY= 0.0000  
 XZ= -3.7828 YZ= 0.0000 ZZ= 26.8431  
 Eigenvalues: 17.7582 23.9287 30.8579



24 H Isotropic = 23.1173 Anisotropy = 11.0309  
 XX= 23.8914 YX= 0.0000 ZX= -1.6962  
 XY= 0.0000 YY= 15.5939 ZY= 0.0000  
 XZ= -2.2928 YZ= 0.0000 ZZ= 29.8666  
 Eigenvalues: 15.5939 23.2868 30.4712

25 H Isotropic = 23.9149 Anisotropy = 9.3323  
 XX= 28.8413 YX= 0.0000 ZX= 2.3192  
 XY= 0.0000 YY= 15.7399 ZY= 0.0000  
 XZ= 1.6054 YZ= 0.0000 ZZ= 27.1637  
 Eigenvalues: 15.7399 25.8684 30.1365

26 H Isotropic = 23.6972 Anisotropy = 5.8639  
 XX= 26.0618 YX= 0.0000 ZX= 0.1817  
 XY= 0.0000 YY= 18.1514 ZY= 0.0000  
 XZ= 1.9392 YZ= 0.0000 ZZ= 26.8784  
 Eigenvalues: 18.1514 25.3338 27.6065

27 H Isotropic = 22.9135 Anisotropy = 8.1060  
 XX= 26.9496 YX= 0.0000 ZX= 1.0394  
 XY= 0.0000 YY= 14.3497 ZY= 0.0000  
 XZ= 1.1504 YZ= 0.0000 ZZ= 27.4411  
 Eigenvalues: 14.3497 26.0732 28.3175

28 H Isotropic = 24.6839 Anisotropy = 3.5161  
 XX= 26.3111 YX= 0.0000 ZX= -1.2108  
 XY= 0.0000 YY= 21.1998 ZY= 0.0000  
 XZ= 0.0289 YZ= 0.0000 ZZ= 26.5407  
 Eigenvalues: 21.1998 25.8239 27.0279

29 H Isotropic = 25.1520 Anisotropy = 3.0910  
 XX= 26.4261 YX= 0.0000 ZX= -0.7866  
 XY= 0.0000 YY= 22.2017 ZY= 0.0000  
 XZ= -0.3133 YZ= 0.0000 ZZ= 26.8281  
 Eigenvalues: 22.2017 26.0416 27.2126

30 H Isotropic = 24.3634 Anisotropy = 11.8438  
 XX= 24.8136 YX= 0.0000 ZX= -4.0617  
 XY= 0.0000 YY= 17.9251 ZY= 0.0000  
 XZ= -3.4763 YZ= 0.0000 ZZ= 30.3515  
 Eigenvalues: 17.9251 22.9058 32.2593

## Isomer 4 (conformer 2)

1 C Isotropic = 57.1684 Anisotropy = 145.1603  
XX= -35.9977 YX= 0.0000 ZX= 23.0109  
XY= 0.0000 YY= 153.9419 ZY= 0.0000  
XZ= 19.3386 YZ= 0.0000 ZZ= 53.5611  
Eigenvalues: -40.7518 58.3152 153.9419

2 C Isotropic = 47.0701 Anisotropy = 113.8365  
XX= 57.7544 YX= 0.0000 ZX= 14.0376  
XY= 0.0000 YY= 122.9611 ZY= 0.0000  
XZ= 18.0390 YZ= 0.0000 ZZ= -39.5053  
Eigenvalues: -42.0818 60.3309 122.9611

3 C Isotropic = 69.6738 Anisotropy = 126.2778  
XX= 32.8458 YX= 0.0000 ZX= -39.6019  
XY= 0.0000 YY= 153.8590 ZY= 0.0000  
XZ= -34.7228 YZ= 0.0000 ZZ= 22.3166  
Eigenvalues: -9.9522 65.1146 153.8590

4 C Isotropic = 46.4661 Anisotropy = 138.3038  
XX= -27.4378 YX= 0.0000 ZX= 13.9958  
XY= 0.0000 YY= 138.6687 ZY= 0.0000  
XZ= 13.5675 YZ= 0.0000 ZZ= 28.1675  
Eigenvalues: -30.6661 31.3958 138.6687

5 C Isotropic = 59.4899 Anisotropy = 163.9445  
XX= 22.4194 YX= 0.0000 ZX= -0.6026  
XY= 0.0000 YY= 168.7862 ZY= 0.0000  
XZ= -0.4792 YZ= 0.0000 ZZ= -12.7361  
Eigenvalues: -12.7444 22.4278 168.7862

6 C Isotropic = 59.0484 Anisotropy = 173.8719  
XX= -15.7763 YX= 0.0000 ZX= -31.3481  
XY= 0.0000 YY= 174.9630 ZY= 0.0000  
XZ= -35.8327 YZ= 0.0000 ZZ= 17.9585  
Eigenvalues: -36.4965 38.6786 174.9630

7 N Isotropic = 114.0381 Anisotropy = 87.6321  
XX= 55.8725 YX= 0.0000 ZX= -32.7009  
XY= 0.0000 YY= 172.4595 ZY= 0.0000  
XZ= -20.4012 YZ= 0.0000 ZZ= 113.7822  
Eigenvalues: 45.5420 124.1127 172.4595

8 C Isotropic = 59.9395 Anisotropy = 118.0960  
XX= 44.0051 YX= 0.0000 ZX= 16.0413  
XY= 0.0000 YY= 138.6702 ZY= 0.0000  
XZ= 32.1471 YZ= 0.0000 ZZ= -2.8567  
Eigenvalues: -13.0344 54.1828 138.6702

9 C Isotropic = 75.3350 Anisotropy = 105.8546  
XX= 63.2318 YX= 0.0000 ZX= 8.7968  
XY= 0.0000 YY= 145.9048 ZY= 0.0000  
XZ= 0.6966 YZ= 0.0000 ZZ= 16.8686  
Eigenvalues: 16.3876 63.7128 145.9048

10 C Isotropic = 20.5002 Anisotropy = 85.2011  
XX= 20.5858 YX= 0.0000 ZX= 6.9506  
XY= 0.0000 YY= 77.3010 ZY= 0.0000  
XZ= 19.0366 YZ= 0.0000 ZZ= -36.3860  
Eigenvalues: -39.2096 23.4093 77.3010

11 Br Isotropic = 1891.8746 Anisotropy = 1573.2670  
XX= 1489.9234 YX= 0.0000 ZX= -313.2970  
XY= 0.0000 YY= 1316.9035 ZY= 0.0000  
XZ= -332.7516 YZ= 0.0000 ZZ= 2868.7969  
Eigenvalues: 1316.9035 1418.0010 2940.7193

12 N Isotropic = -7.0221 Anisotropy = 319.5960  
XX= -77.7820 YX= 0.0000 ZX= -48.9990

XY= 0.0000 YY= 206.0419 ZY= 0.0000  
 XZ= -63.0125 YZ= 0.0000 ZZ= -149.3263  
 Eigenvalues: -180.0093 -47.0990 206.0419  
 13 C Isotropic = 41.9902 Anisotropy = 106.1535  
 XX= 25.7668 YX= 0.0000 ZX= -34.8068  
 XY= 0.0000 YY= 112.7592 ZY= 0.0000  
 XZ= -44.0681 YZ= 0.0000 ZZ= -12.5554  
 Eigenvalues: -37.2402 50.4516 112.7592  
 14 C Isotropic = 67.3982 Anisotropy = 70.3723  
 XX= 112.4378 YX= 0.0000 ZX= 7.8574  
 XY= 0.0000 YY= 76.6665 ZY= 0.0000  
 XZ= 19.6972 YZ= 0.0000 ZZ= 13.0903  
 Eigenvalues: 11.2151 76.6665 114.3130  
 15 O Isotropic = 17.6490 Anisotropy = 169.6531  
 XX= -60.8696 YX= 0.0000 ZX= -73.5872  
 XY= 0.0000 YY= 130.7510 ZY= 0.0000  
 XZ= -32.1693 YZ= 0.0000 ZZ= -16.9345  
 Eigenvalues: -96.1619 18.3577 130.7510  
 16 C Isotropic = 61.0622 Anisotropy = 106.2851  
 XX= -0.4643 YX= 0.0000 ZX= 3.4039  
 XY= 0.0000 YY= 131.9189 ZY= 0.0000  
 XZ= 12.1575 YZ= 0.0000 ZZ= 51.7321  
 Eigenvalues: -1.5995 52.8672 131.9189  
 17 N Isotropic = 95.7617 Anisotropy = 123.8644  
 XX= 99.7452 YX= 0.0000 ZX= 17.1258  
 XY= 0.0000 YY= 178.3380 ZY= 0.0000  
 XZ= 10.6265 YZ= 0.0000 ZZ= 9.2020  
 Eigenvalues: 7.1231 101.8241 178.3380  
 18 C Isotropic = 65.9569 Anisotropy = 115.6720  
 XX= -9.8851 YX= 0.0000 ZX= 1.0962  
 XY= 0.0000 YY= 143.0716 ZY= 0.0000  
 XZ= -9.3457 YZ= 0.0000 ZZ= 64.6843  
 Eigenvalues: -10.1126 64.9118 143.0716  
 19 C Isotropic = 71.5654 Anisotropy = 133.2593  
 XX= 30.0247 YX= 0.0000 ZX= -36.1295  
 XY= 0.0000 YY= 160.4049 ZY= 0.0000  
 XZ= -31.4242 YZ= 0.0000 ZZ= 24.2665  
 Eigenvalues: -6.7537 61.0449 160.4049  
 20 C Isotropic = 73.8020 Anisotropy = 138.6932  
 XX= 32.9126 YX= 0.0000 ZX= 23.3945  
 XY= 0.0000 YY= 166.2642 ZY= 0.0000  
 XZ= 25.9700 YZ= 0.0000 ZZ= 22.2293  
 Eigenvalues: 2.3173 52.8246 166.2642  
 21 I Isotropic = 3678.8351 Anisotropy = 1987.8749  
 XX= 3092.1047 YX= 0.0000 ZX= -857.6764  
 XY= 0.0000 YY= 3315.3729 ZY= 0.0000  
 XZ= -835.9612 YZ= 0.0000 ZZ= 4629.0277  
 Eigenvalues: 2717.0474 3315.3729 5004.0850  
 22 H Isotropic = 24.0362 Anisotropy = 10.3698  
 XX= 24.0863 YX= 0.0000 ZX= 2.3205  
 XY= 0.0000 YY= 17.9620 ZY= 0.0000  
 XZ= 2.6197 YZ= 0.0000 ZZ= 30.0604  
 Eigenvalues: 17.9620 23.1973 30.9494  
 23 H Isotropic = 24.1892 Anisotropy = 10.0553  
 XX= 27.4713 YX= 0.0000 ZX= -3.1596  
 XY= 0.0000 YY= 17.7874 ZY= 0.0000  
 XZ= -3.8438 YZ= 0.0000 ZZ= 27.3089  
 Eigenvalues: 17.7874 23.8874 30.8928

24 H Isotropic = 22.9380 Anisotropy = 10.2409  
 XX= 24.2310 YX= 0.0000 ZX= -1.7605  
 XY= 0.0000 YY= 15.5180 ZY= 0.0000  
 XZ= -2.1764 YZ= 0.0000 ZZ= 29.0651  
 Eigenvalues: 15.5180 23.5308 29.7653  
 25 H Isotropic = 23.9621 Anisotropy = 9.2889  
 XX= 29.0084 YX= 0.0000 ZX= 2.1203  
 XY= 0.0000 YY= 15.8305 ZY= 0.0000  
 XZ= 1.6542 YZ= 0.0000 ZZ= 27.0474  
 Eigenvalues: 15.8305 25.9011 30.1547  
 26 H Isotropic = 23.8382 Anisotropy = 6.7428  
 XX= 26.0788 YX= 0.0000 ZX= 0.5607  
 XY= 0.0000 YY= 18.0943 ZY= 0.0000  
 XZ= 2.4302 YZ= 0.0000 ZZ= 27.3415  
 Eigenvalues: 18.0943 25.0869 28.3334  
 27 H Isotropic = 22.6643 Anisotropy = 8.7459  
 XX= 25.8314 YX= 0.0000 ZX= 0.7814  
 XY= 0.0000 YY= 13.8468 ZY= 0.0000  
 XZ= 0.6040 YZ= 0.0000 ZZ= 28.3148  
 Eigenvalues: 13.8468 25.6512 28.4950  
 28 H Isotropic = 24.7372 Anisotropy = 3.5417  
 XX= 27.0920 YX= 0.0000 ZX= 0.7668  
 XY= 0.0000 YY= 20.9610 ZY= 0.0000  
 XZ= -0.6118 YZ= 0.0000 ZZ= 26.1587  
 Eigenvalues: 20.9610 26.1523 27.0984  
 29 H Isotropic = 25.1314 Anisotropy = 2.9977  
 XX= 27.1017 YX= 0.0000 ZX= 0.4021  
 XY= 0.0000 YY= 22.0693 ZY= 0.0000  
 XZ= -0.0824 YZ= 0.0000 ZZ= 26.2232  
 Eigenvalues: 22.0693 26.1950 27.1299  
 30 H Isotropic = 24.4061 Anisotropy = 11.6796  
 XX= 31.5617 YX= 0.0000 ZX= 2.5158  
 XY= 0.0000 YY= 17.7671 ZY= 0.0000  
 XZ= 2.0612 YZ= 0.0000 ZZ= 23.8893  
 Eigenvalues: 17.7671 23.2586 32.1925

### Isomer 4 (conformer 3)

1 C Isotropic = 56.6571 Anisotropy = 145.7821  
XX= -39.6708 YX= 0.0000 ZX= 17.7890  
XY= 0.0000 YY= 153.8451 ZY= 0.0000  
XZ= 14.3524 YZ= 0.0000 ZZ= 55.7969  
Eigenvalues: -42.3035 58.4296 153.8451

2 C Isotropic = 47.5728 Anisotropy = 113.7713  
XX= 55.8447 YX= 0.0000 ZX= 20.0226  
XY= 0.0000 YY= 123.4203 ZY= 0.0000  
XZ= 23.9248 YZ= 0.0000 ZZ= -36.5466  
Eigenvalues: -41.5064 60.8045 123.4203

3 C Isotropic = 69.6473 Anisotropy = 126.3618  
XX= 37.2192 YX= 0.0000 ZX= -38.2124  
XY= 0.0000 YY= 153.8885 ZY= 0.0000  
XZ= -33.9863 YZ= 0.0000 ZZ= 17.8343  
Eigenvalues: -9.8511 64.9046 153.8885

4 C Isotropic = 46.6318 Anisotropy = 137.4154  
XX= -28.2388 YX= 0.0000 ZX= 10.2998  
XY= 0.0000 YY= 138.2420 ZY= 0.0000  
XZ= 9.5658 YZ= 0.0000 ZZ= 29.8920  
Eigenvalues: -29.8892 31.5424 138.2420

5 C Isotropic = 59.2648 Anisotropy = 164.8220  
XX= 21.0749 YX= 0.0000 ZX= 1.7331  
XY= 0.0000 YY= 169.1461 ZY= 0.0000  
XZ= 1.0661 YZ= 0.0000 ZZ= -12.4267  
Eigenvalues: -12.4851 21.1333 169.1461

6 C Isotropic = 59.6518 Anisotropy = 171.2929  
XX= -10.5347 YX= 0.0000 ZX= -33.4824  
XY= 0.0000 YY= 173.8471 ZY= 0.0000  
XZ= -37.9053 YZ= 0.0000 ZZ= 15.6430  
Eigenvalues: -35.4638 40.5722 173.8471

7 N Isotropic = 112.9007 Anisotropy = 89.5364  
XX= 56.6646 YX= 0.0000 ZX= -36.1747  
XY= 0.0000 YY= 172.5917 ZY= 0.0000  
XZ= -25.8928 YZ= 0.0000 ZZ= 109.4460  
Eigenvalues: 42.3175 123.7931 172.5917

8 C Isotropic = 59.0367 Anisotropy = 119.5157  
XX= 40.5612 YX= 0.0000 ZX= 19.8481  
XY= 0.0000 YY= 138.7138 ZY= 0.0000  
XZ= 33.5027 YZ= 0.0000 ZZ= -2.1650  
Eigenvalues: -14.9773 53.3735 138.7138

9 C Isotropic = 75.4433 Anisotropy = 105.0128  
XX= 64.2972 YX= 0.0000 ZX= 12.6734  
XY= 0.0000 YY= 145.4518 ZY= 0.0000  
XZ= 6.2027 YZ= 0.0000 ZZ= 16.5809  
Eigenvalues: 14.7819 66.0962 145.4518

10 C Isotropic = 18.8774 Anisotropy = 84.1731  
XX= -26.3556 YX= 0.0000 ZX= -21.5287  
XY= 0.0000 YY= 74.9928 ZY= 0.0000  
XZ= -35.7759 YZ= 0.0000 ZZ= 7.9949  
Eigenvalues: -42.5861 24.2254 74.9928

11 Br Isotropic = 1896.3345 Anisotropy = 1571.4629  
XX= 1539.4230 YX= 0.0000 ZX= -394.9038  
XY= 0.0000 YY= 1321.4948 ZY= 0.0000  
XZ= -412.0025 YZ= 0.0000 ZZ= 2828.0859  
Eigenvalues: 1321.4948 1423.5324 2943.9765

12 N Isotropic = -12.0254 Anisotropy = 316.1235  
XX= -64.3973 YX= 0.0000 ZX= -65.0517

XY= 0.0000 YY= 198.7236 ZY= 0.0000  
 XZ= -37.1601 YZ= 0.0000 ZZ= -170.4024  
 Eigenvalues: -191.0279 -43.7718 198.7236  
 13 C Isotropic = 41.6153 Anisotropy = 108.2623  
 XX= 43.0032 YX= 0.0000 ZX= -27.4526  
 XY= 0.0000 YY= 113.7902 ZY= 0.0000  
 XZ= -19.4427 YZ= 0.0000 ZZ= -31.9473  
 Eigenvalues: -38.6782 49.7341 113.7902  
 14 C Isotropic = 75.1657 Anisotropy = 83.9899  
 XX= 44.5706 YX= 0.0000 ZX= -42.7726  
 XY= 0.0000 YY= 79.1370 ZY= 0.0000  
 XZ= -58.0847 YZ= 0.0000 ZZ= 101.7895  
 Eigenvalues: 15.2012 79.1370 131.1589  
 15 O Isotropic = 16.4235 Anisotropy = 177.3830  
 XX= 7.8291 YX= 0.0000 ZX= 23.5417  
 XY= 0.0000 YY= 134.6789 ZY= 0.0000  
 XZ= -7.5018 YZ= 0.0000 ZZ= -93.2374  
 Eigenvalues: -93.8698 8.4616 134.6789  
 16 C Isotropic = 60.1767 Anisotropy = 102.9272  
 XX= 49.3371 YX= 0.0000 ZX= -21.4790  
 XY= 0.0000 YY= 128.7948 ZY= 0.0000  
 XZ= -16.0805 YZ= 0.0000 ZZ= 2.3981  
 Eigenvalues: -4.1906 55.9258 128.7948  
 17 N Isotropic = 98.2491 Anisotropy = 130.2242  
 XX= 13.8287 YX= 0.0000 ZX= -2.1127  
 XY= 0.0000 YY= 185.0652 ZY= 0.0000  
 XZ= -6.0161 YZ= 0.0000 ZZ= 95.8534  
 Eigenvalues: 13.6278 96.0543 185.0652  
 18 C Isotropic = 65.1318 Anisotropy = 113.2523  
 XX= 66.0569 YX= 0.0000 ZX= -0.4826  
 XY= 0.0000 YY= 140.6334 ZY= 0.0000  
 XZ= -12.7995 YZ= 0.0000 ZZ= -11.2948  
 Eigenvalues: -11.8608 66.6229 140.6334  
 19 C Isotropic = 72.6448 Anisotropy = 136.8430  
 XX= 33.6390 YX= 0.0000 ZX= 31.0206  
 XY= 0.0000 YY= 163.8735 ZY= 0.0000  
 XZ= 34.6393 YZ= 0.0000 ZZ= 20.4220  
 Eigenvalues: -6.4580 60.5190 163.8735  
 20 C Isotropic = 71.1151 Anisotropy = 137.4867  
 XX= 12.0843 YX= 0.0000 ZX= -27.0832  
 XY= 0.0000 YY= 162.7729 ZY= 0.0000  
 XZ= -24.1921 YZ= 0.0000 ZZ= 38.4880  
 Eigenvalues: -3.5509 54.1232 162.7729  
 21 I Isotropic = 3723.4127 Anisotropy = 1931.2693  
 XX= 4774.7061 YX= 0.0000 ZX= 704.9707  
 XY= 0.0000 YY= 3389.9361 ZY= 0.0000  
 XZ= 671.5437 YZ= 0.0000 ZZ= 3005.5960  
 Eigenvalues: 2769.3765 3389.9361 5010.9256  
 22 H Isotropic = 24.0579 Anisotropy = 10.6927  
 XX= 23.6123 YX= 0.0000 ZX= 2.0116  
 XY= 0.0000 YY= 17.9824 ZY= 0.0000  
 XZ= 2.2784 YZ= 0.0000 ZZ= 30.5789  
 Eigenvalues: 17.9824 23.0048 31.1864  
 23 H Isotropic = 24.1905 Anisotropy = 10.0047  
 XX= 27.9279 YX= 0.0000 ZX= -3.0742  
 XY= 0.0000 YY= 17.7811 ZY= 0.0000  
 XZ= -3.7736 YZ= 0.0000 ZZ= 26.8626  
 Eigenvalues: 17.7811 23.9302 30.8603

24 H Isotropic = 23.1846 Anisotropy = 10.9786  
 XX= 23.9036 YX= 0.0000 ZX= -1.7013  
 XY= 0.0000 YY= 15.7263 ZY= 0.0000  
 XZ= -2.2107 YZ= 0.0000 ZZ= 29.9240  
 Eigenvalues: 15.7263 23.3239 30.5037  
 25 H Isotropic = 23.9059 Anisotropy = 9.3373  
 XX= 28.8758 YX= 0.0000 ZX= 2.2902  
 XY= 0.0000 YY= 15.7475 ZY= 0.0000  
 XZ= 1.6140 YZ= 0.0000 ZZ= 27.0943  
 Eigenvalues: 15.7475 25.8393 30.1307  
 26 H Isotropic = 23.6276 Anisotropy = 5.7772  
 XX= 26.0293 YX= 0.0000 ZX= 0.1640  
 XY= 0.0000 YY= 18.1140 ZY= 0.0000  
 XZ= 1.9069 YZ= 0.0000 ZZ= 26.7394  
 Eigenvalues: 18.1140 25.2897 27.4790  
 27 H Isotropic = 22.3847 Anisotropy = 17.3495  
 XX= 27.7933 YX= 0.0000 ZX= -6.3910  
 XY= 0.0000 YY= 10.8693 ZY= 0.0000  
 XZ= -5.2053 YZ= 0.0000 ZZ= 28.4914  
 Eigenvalues: 10.8693 22.3337 33.9510  
 28 H Isotropic = 24.7674 Anisotropy = 4.0206  
 XX= 26.0593 YX= 0.0000 ZX= 0.1245  
 XY= 0.0000 YY= 21.0146 ZY= 0.0000  
 XZ= -1.2285 YZ= 0.0000 ZZ= 27.2284  
 Eigenvalues: 21.0146 25.8399 27.4478  
 29 H Isotropic = 25.2162 Anisotropy = 2.5531  
 XX= 26.5044 YX= 0.0000 ZX= -0.0777  
 XY= 0.0000 YY= 22.4492 ZY= 0.0000  
 XZ= -0.5303 YZ= 0.0000 ZZ= 26.6951  
 Eigenvalues: 22.4492 26.2812 26.9183  
 30 H Isotropic = 24.4569 Anisotropy = 5.5892  
 XX= 26.1288 YX= 0.0000 ZX= -1.6321  
 XY= 0.0000 YY= 19.9519 ZY= 0.0000  
 XZ= -1.0768 YZ= 0.0000 ZZ= 27.2900  
 Eigenvalues: 19.9519 25.2358 28.1831

#### Isomer 4 (conformer 4)

1 C Isotropic = 56.7164 Anisotropy = 145.5637

XX= -35.3673 YX= 0.0000 ZX= 25.4282

XY= 0.0000 YY= 153.7589 ZY= 0.0000

XZ= 21.9020 YZ= 0.0000 ZZ= 51.7578

Eigenvalues: -41.3803 57.7707 153.7589

2 C Isotropic = 46.7592 Anisotropy = 113.8638

XX= 58.1595 YX= 0.0000 ZX= 11.4684

XY= 0.0000 YY= 122.6684 ZY= 0.0000

XZ= 15.6689 YZ= 0.0000 ZZ= -40.5502

Eigenvalues: -42.3814 59.9906 122.6684

3 C Isotropic = 69.9731 Anisotropy = 125.5220

XX= 31.2677 YX= 0.0000 ZX= -39.8289

XY= 0.0000 YY= 153.6544 ZY= 0.0000

XZ= -35.2752 YZ= 0.0000 ZZ= 24.9971

Eigenvalues: -9.5503 65.8151 153.6544

4 C Isotropic = 46.4054 Anisotropy = 138.5074

XX= -26.9771 YX= 0.0000 ZX= 15.7094

XY= 0.0000 YY= 138.7437 ZY= 0.0000

XZ= 15.1292 YZ= 0.0000 ZZ= 27.4495

Eigenvalues: -31.0418 31.5143 138.7437

5 C Isotropic = 59.5822 Anisotropy = 164.2953

XX= 22.5422 YX= 0.0000 ZX= -1.1186

XY= 0.0000 YY= 169.1125 ZY= 0.0000

XZ= -1.4948 YZ= 0.0000 ZZ= -12.9079

Eigenvalues: -12.9560 22.5903 169.1125

6 C Isotropic = 58.3925 Anisotropy = 176.1805

XX= -18.8525 YX= 0.0000 ZX= -29.1650

XY= 0.0000 YY= 175.8462 ZY= 0.0000

XZ= -34.0507 YZ= 0.0000 ZZ= 18.1839

Eigenvalues: -36.9673 36.2987 175.8462

7 N Isotropic = 114.2142 Anisotropy = 87.7690

XX= 54.6595 YX= 0.0000 ZX= -31.1871

XY= 0.0000 YY= 172.7268 ZY= 0.0000

XZ= -18.8697 YZ= 0.0000 ZZ= 115.2561

Eigenvalues: 45.6588 124.2568 172.7268

8 C Isotropic = 60.1905 Anisotropy = 117.7511

XX= 45.5510 YX= 0.0000 ZX= 15.0006

XY= 0.0000 YY= 138.6912 ZY= 0.0001

XZ= 31.1121 YZ= 0.0000 ZZ= -3.6706

Eigenvalues: -12.7835 54.6639 138.6912

9 C Isotropic = 75.3076 Anisotropy = 105.9964

XX= 63.4264 YX= 0.0000 ZX= 7.4791

XY= 0.0000 YY= 145.9719 ZY= 0.0000

XZ= -0.8728 YZ= 0.0000 ZZ= 16.5245

Eigenvalues: 16.2930 63.6579 145.9719

10 C Isotropic = 19.9239 Anisotropy = 85.0650

XX= 22.5667 YX= 0.0000 ZX= 5.8374

XY= -0.0005 YY= 76.6339 ZY= 0.0000

XZ= 19.8624 YZ= 0.0000 ZZ= -39.4290

Eigenvalues: -41.9868 25.1245 76.6339

11 Br Isotropic = 1892.1319 Anisotropy = 1571.9932

XX= 1475.5332 YX= -0.0001 ZX= -276.9825

XY= 0.0002 YY= 1316.5462 ZY= 0.0000

XZ= -294.8234 YZ= 0.0001 ZZ= 2884.3164

Eigenvalues: 1316.5462 1419.7222 2940.1274

12 N Isotropic = -15.8325 Anisotropy = 326.1184

XX= -91.1108 YX= -0.0002 ZX= -58.6706



XY= 0.0026 YY= 201.5797 ZY= 0.0012  
 XZ= -70.5900 YZ= 0.0004 ZZ= -157.9664  
 Eigenvalues: -197.3019 -51.7754 201.5797  
 13 C Isotropic = 41.3247 Anisotropy = 108.2499  
 XX= 22.5878 YX= -0.0008 ZX= -37.0301  
 XY= 0.0007 YY= 113.4914 ZY= -0.0003  
 XZ= -44.3916 YZ= -0.0009 ZZ= -12.1049  
 Eigenvalues: -39.0110 49.4938 113.4914  
 14 C Isotropic = 74.7040 Anisotropy = 82.6122  
 XX= 126.7167 YX= -0.0004 ZX= 11.4155  
 XY= 0.0077 YY= 79.1065 ZY= 0.0062  
 XZ= 25.5383 YZ= 0.0001 ZZ= 18.2888  
 Eigenvalues: 15.2267 79.1065 129.7788  
 15 O Isotropic = 23.4975 Anisotropy = 158.6400  
 XX= -52.8248 YX= -0.0005 ZX= -74.8163  
 XY= -0.0004 YY= 129.2575 ZY= -0.0003  
 XZ= -35.9106 YZ= 0.0001 ZZ= -5.9402  
 Eigenvalues: -89.5045 30.7395 129.2575  
 16 C Isotropic = 60.0429 Anisotropy = 103.7312  
 XX= 40.7760 YX= -0.0044 ZX= -24.1384  
 XY= -0.0152 YY= 129.1970 ZY= -0.0268  
 XZ= -28.8091 YZ= 0.0010 ZZ= 10.1556  
 Eigenvalues: -5.1162 56.0479 129.1970  
 17 N Isotropic = 96.7538 Anisotropy = 132.2398  
 XX= 62.7282 YX= 0.0032 ZX= 36.8842  
 XY= -0.0229 YY= 184.9136 ZY= 0.0551  
 XZ= 39.9429 YZ= -0.0018 ZZ= 42.6196  
 Eigenvalues: 12.9663 92.3814 184.9137  
 18 C Isotropic = 65.5322 Anisotropy = 112.5196  
 XX= 29.5609 YX= 0.0058 ZX= -45.6969  
 XY= 0.0457 YY= 140.5453 ZY= 0.0541  
 XZ= -33.4888 YZ= -0.0076 ZZ= 26.4905  
 Eigenvalues: -11.5970 67.6483 140.5453  
 19 C Isotropic = 72.8275 Anisotropy = 137.6432  
 XX= -6.7457 YX= 0.0904 ZX= -0.1013  
 XY= 0.0368 YY= 164.5896 ZY= 0.0007  
 XZ= -3.7518 YZ= -0.0014 ZZ= 60.6385  
 Eigenvalues: -6.8008 60.6936 164.5896  
 20 C Isotropic = 70.4945 Anisotropy = 137.7592  
 XX= 52.4733 YX= 0.0110 ZX= 11.7186  
 XY= 0.0308 YY= 162.3339 ZY= -0.0655  
 XZ= 9.4481 YZ= 0.0039 ZZ= -3.3238  
 Eigenvalues: -5.2638 54.4133 162.3340  
 21 I Isotropic = 3733.5418 Anisotropy = 1973.0647  
 XX= 3090.6699 YX= 0.0073 ZX= -785.4217  
 XY= -0.0276 YY= 3373.4705 ZY= 0.0130  
 XZ= -778.9593 YZ= -0.0004 ZZ= 4736.4850  
 Eigenvalues: 2778.2366 3373.4705 5048.9183  
 22 H Isotropic = 24.0212 Anisotropy = 10.3222  
 XX= 24.2478 YX= 0.0000 ZX= 2.5021  
 XY= 0.0000 YY= 17.9615 ZY= 0.0000  
 XZ= 2.7805 YZ= 0.0000 ZZ= 29.8543  
 Eigenvalues: 17.9615 23.1995 30.9027  
 23 H Isotropic = 24.2281 Anisotropy = 10.0998  
 XX= 27.3214 YX= 0.0000 ZX= -3.1954  
 XY= 0.0000 YY= 17.8272 ZY= 0.0000  
 XZ= -3.8669 YZ= 0.0000 ZZ= 27.5356  
 Eigenvalues: 17.8272 23.8958 30.9613

24 H Isotropic = 22.8691 Anisotropy = 10.1180  
 XX= 24.1072 YX= 0.0000 ZX= -1.6823  
 XY= -0.0001 YY= 15.5323 ZY= 0.0000  
 XZ= -2.0922 YZ= 0.0000 ZZ= 28.9676  
 Eigenvalues: 15.5323 23.4605 29.6144  
 25 H Isotropic = 24.0083 Anisotropy = 9.1962  
 XX= 29.0767 YX= 0.0000 ZX= 2.0582  
 XY= 0.0000 YY= 15.9388 ZY= 0.0000  
 XZ= 1.5887 YZ= 0.0000 ZZ= 27.0093  
 Eigenvalues: 15.9388 25.9470 30.1390  
 26 H Isotropic = 23.9178 Anisotropy = 6.7081  
 XX= 26.1692 YX= 0.0000 ZX= 0.6189  
 XY= 0.0000 YY= 18.2410 ZY= 0.0000  
 XZ= 2.4302 YZ= 0.0000 ZZ= 27.3432  
 Eigenvalues: 18.2410 25.1225 28.3899  
 27 H Isotropic = 22.3949 Anisotropy = 17.6219  
 XX= 34.1104 YX= -0.0001 ZX= -0.0762  
 XY= -0.0015 YY= 10.4603 ZY= 0.0010  
 XZ= -1.1479 YZ= 0.0000 ZZ= 22.6141  
 Eigenvalues: 10.4603 22.5816 34.1429  
 28 H Isotropic = 24.6508 Anisotropy = 3.9767  
 XX= 27.0744 YX= -0.0003 ZX= -0.0328  
 XY= 0.0017 YY= 20.9488 ZY= 0.0012  
 XZ= 1.1505 YZ= 0.0000 ZZ= 25.9294  
 Eigenvalues: 20.9488 25.7018 27.3020  
 29 H Isotropic = 25.1376 Anisotropy = 2.4430  
 XX= 26.7520 YX= 0.0018 ZX= -0.1560  
 XY= -0.0059 YY= 22.2807 ZY= 0.0001  
 XZ= 0.3048 YZ= -0.0001 ZZ= 26.3801  
 Eigenvalues: 22.2807 26.3658 26.7663  
 30 H Isotropic = 24.2970 Anisotropy = 5.5051  
 XX= 27.8070 YX= -0.0003 ZX= 0.8700  
 XY= 0.0011 YY= 19.5958 ZY= -0.0021  
 XZ= 0.3898 YZ= 0.0000 ZZ= 25.4883  
 Eigenvalues: 19.5958 25.3282 27.9671

## Isomer 5 (conformer 1)

1 C Isotropic = 56.4680 Anisotropy = 145.7535

XX= -41.8011 YX= 7.8172 ZX= -4.2552

XY= 7.7767 YY= 152.9670 ZY= -5.6876

XZ= -1.9282 YZ= -5.7666 ZZ= 58.2383

Eigenvalues: -42.1944 57.9615 153.6371

2 C Isotropic = 46.3050 Anisotropy = 114.9470

XX= 46.2821 YX= 1.1554 ZX= -31.2973

XY= 1.0543 YY= 122.3674 ZY= -8.3494

XZ= -35.0029 YZ= -8.1865 ZZ= -29.7347

Eigenvalues: -42.4884 58.4670 122.9363

3 C Isotropic = 70.3211 Anisotropy = 124.5086

XX= 48.6680 YX= 6.5228 ZX= 34.9287

XY= 6.3376 YY= 152.4192 ZY= -10.3985

XZ= 30.4046 YZ= -10.1437 ZZ= 9.8759

Eigenvalues: -9.6237 67.2600 153.3268

4 C Isotropic = 47.4347 Anisotropy = 140.0350

XX= -30.0329 YX= 6.8286 ZX= -2.8152

XY= 7.0687 YY= 140.0905 ZY= -6.7723

XZ= -1.4730 YZ= -6.5272 ZZ= 32.2466

Eigenvalues: -30.3724 31.8852 140.7914

5 C Isotropic = 58.7333 Anisotropy = 161.7694

XX= 20.9935 YX= 5.7564 ZX= -6.1364

XY= 5.3999 YY= 165.7344 ZY= -10.3116

XZ= -7.6062 YZ= -10.2939 ZZ= -10.5279

Eigenvalues: -12.4142 22.0345 166.5796

6 C Isotropic = 58.0816 Anisotropy = 171.8942

XX= -0.7620 YX= 9.4113 ZX= 34.7293

XY= 9.4890 YY= 171.5719 ZY= -11.6073

XZ= 39.3453 YZ= -11.9560 ZZ= 3.4349

Eigenvalues: -36.8345 38.4015 172.6777

7 N Isotropic = 112.4180 Anisotropy = 88.0135

XX= 67.3389 YX= 6.8860 ZX= 41.5757

XY= 6.5947 YY= 170.4503 ZY= -6.0640

XZ= 35.8674 YZ= -5.8225 ZZ= 99.4647

Eigenvalues: 40.8686 125.2917 171.0936

8 C Isotropic = 59.0253 Anisotropy = 122.1983

XX= 28.4575 YX= 3.4359 ZX= -19.7706

XY= 3.6473 YY= 139.9044 ZY= -7.2755

XZ= -31.4984 YZ= -6.5615 ZZ= 8.7139

Eigenvalues: -8.9764 45.5614 140.4908

9 C Isotropic = 75.6456 Anisotropy = 108.2643

XX= 58.2873 YX= 2.7171 ZX= -16.6856

XY= 2.5850 YY= 147.3095 ZY= -6.8642

XZ= -8.7219 YZ= -7.0921 ZZ= 21.3400

Eigenvalues: 17.1272 61.9878 147.8218

10 C Isotropic = 15.3468 Anisotropy = 119.2651

XX= -30.1640 YX= 7.7425 ZX= 45.5606

XY= 6.7911 YY= 94.0861 ZY= -8.4993

XZ= 25.8489 YZ= -7.6051 ZZ= -17.8818

Eigenvalues: -60.9966 12.1801 94.8569

11 Br Isotropic = 1894.0600 Anisotropy = 1569.9148

XX= 1661.7173 YX= 21.9920 ZX= 554.3591

XY= 18.3185 YY= 1331.3247 ZY= 53.5545

XZ= 573.6241 YZ= 63.4688 ZZ= 2689.1380

Eigenvalues: 1328.6389 1412.8713 2940.6699

12 C Isotropic = 100.2687 Anisotropy = 40.7510

XX= 49.7775 YX= 3.6413 ZX= 8.0495

XY= 4.1650 YY= 125.1569 ZY= -0.8674  
 XZ= 13.8616 YZ= -0.6300 ZZ= 125.8717  
 Eigenvalues: 48.0273 125.3427 127.4361  
 13 C Isotropic = 27.3914 Anisotropy = 134.3361  
 XX= 26.5139 YX= 3.5317 ZX= -1.9683  
 XY= 5.5956 YY= 116.1662 ZY= -9.8993  
 XZ= 29.9739 YZ= -11.1919 ZZ= -60.5059  
 Eigenvalues: -63.3934 28.6188 116.9488  
 14 N Isotropic = -113.2263 Anisotropy = 245.8080  
 XX= -115.0103 YX= 5.3728 ZX= -27.5300  
 XY= 6.4088 YY= 49.4554 ZY= -16.0422  
 XZ= -8.3253 YZ= -18.2722 ZZ= -274.1239  
 Eigenvalues: -276.9438 -113.3807 50.6457  
 15 O Isotropic = -42.4338 Anisotropy = 266.5200  
 XX= -123.4879 YX= 11.1849 ZX= 10.4065  
 XY= 12.7103 YY= 133.8076 ZY= -15.8795  
 XZ= 0.0479 YZ= -15.7093 ZZ= -137.6212  
 Eigenvalues: -140.6344 -121.9133 135.2461  
 16 C Isotropic = 62.4543 Anisotropy = 101.9378  
 XX= 41.4302 YX= 2.0512 ZX= 25.8185  
 XY= 1.6733 YY= 130.0015 ZY= -7.0544  
 XZ= 16.9411 YZ= -6.6016 ZZ= 15.9312  
 Eigenvalues: 3.4164 53.5337 130.4128  
 17 N Isotropic = 96.5845 Anisotropy = 126.1287  
 XX= 14.9879 YX= -0.6056 ZX= -28.0654  
 XY= 0.0411 YY= 180.4881 ZY= -2.8245  
 XZ= -23.0513 YZ= -5.0048 ZZ= 94.2775  
 Eigenvalues: 7.4525 101.6307 180.6703  
 18 C Isotropic = 63.8392 Anisotropy = 119.5954  
 XX= 53.0302 YX= 1.8689 ZX= 19.7142  
 XY= 1.5159 YY= 143.0309 ZY= -8.7182  
 XZ= 28.0142 YZ= -9.1308 ZZ= -4.5436  
 Eigenvalues: -13.6625 61.6106 143.5694  
 19 C Isotropic = 72.8971 Anisotropy = 133.0624  
 XX= 51.3535 YX= -0.4571 ZX= -23.2269  
 XY= -1.2240 YY= 161.0519 ZY= -9.3630  
 XZ= -27.2220 YZ= -9.1105 ZZ= 6.2857  
 Eigenvalues: -5.4669 62.5527 161.6053  
 20 C Isotropic = 69.9970 Anisotropy = 144.4655  
 XX= -3.0579 YX= 1.7968 ZX= 8.3074  
 XY= 2.0722 YY= 165.9381 ZY= -6.0041  
 XZ= 9.9968 YZ= -7.0426 ZZ= 47.1108  
 Eigenvalues: -4.7297 48.4134 166.3073  
 21 I Isotropic = 3879.6308 Anisotropy = 1460.5259  
 XX= 4821.8636 YX= -37.3435 ZX= 260.3130  
 XY= -58.5981 YY= 3723.0245 ZY= -49.0140  
 XZ= 190.6983 YZ= -39.1338 ZZ= 3094.0044  
 Eigenvalues: 3062.9105 3722.6673 4853.3147  
 22 H Isotropic = 24.0478 Anisotropy = 10.0414  
 XX= 23.4789 YX= -0.2798 ZX= -0.8103  
 XY= -0.3031 YY= 18.1168 ZY= 0.7903  
 XZ= -1.1920 YZ= 0.8169 ZZ= 30.5476  
 Eigenvalues: 18.0555 23.3458 30.7421  
 23 H Isotropic = 24.1023 Anisotropy = 10.4491  
 XX= 28.8203 YX= -0.2715 ZX= 3.0343  
 XY= -0.2412 YY= 17.5318 ZY= 0.4065  
 XZ= 3.7468 YZ= 0.3568 ZZ= 25.9549  
 Eigenvalues: 17.4978 23.7408 31.0684

24 H Isotropic = 22.8705 Anisotropy = 10.7002  
 XX= 25.5184 YX= -0.2192 ZX= 3.1246  
 XY= -0.2148 YY= 15.6343 ZY= 0.5753  
 XZ= 3.6183 YZ= 0.5490 ZZ= 27.4589  
 Eigenvalues: 15.5919 23.0158 30.0040  
 25 H Isotropic = 23.7908 Anisotropy = 8.9880  
 XX= 27.7445 YX= -0.6240 ZX= -2.0434  
 XY= -0.6436 YY= 15.3890 ZY= 0.8936  
 XZ= -1.3440 YZ= 0.8367 ZZ= 28.2389  
 Eigenvalues: 15.3090 26.2807 29.7828  
 26 H Isotropic = 22.8609 Anisotropy = 15.4670  
 XX= 21.7417 YX= -0.2786 ZX= 1.4077  
 XY= -0.4240 YY= 13.7368 ZY= 1.1080  
 XZ= -1.3596 YZ= 1.1928 ZZ= 33.1042  
 Eigenvalues: 13.6534 21.7570 33.1723  
 27 H Isotropic = 22.6592 Anisotropy = 8.1273  
 XX= 27.6203 YX= -0.1411 ZX= 0.7960  
 XY= 0.0525 YY= 14.4814 ZY= 0.5354  
 XZ= 1.2021 YZ= 0.6523 ZZ= 25.8758  
 Eigenvalues: 14.4499 25.4503 28.0774  
 28 H Isotropic = 24.6496 Anisotropy = 3.5545  
 XX= 26.0530 YX= -0.1277 ZX= -1.2070  
 XY= -0.0733 YY= 21.2063 ZY= 0.3759  
 XZ= 0.1294 YZ= 0.3362 ZZ= 26.6897  
 Eigenvalues: 21.1823 25.7472 27.0193  
 29 H Isotropic = 25.1561 Anisotropy = 3.2954  
 XX= 26.1163 YX= -0.0890 ZX= -0.7029  
 XY= -0.0834 YY= 22.1946 ZY= 0.3025  
 XZ= -0.2207 YZ= 0.3231 ZZ= 27.1575  
 Eigenvalues: 22.1741 25.9412 27.3530  
 30 H Isotropic = 23.7900 Anisotropy = 14.0438  
 XX= 22.3034 YX= -0.3720 ZX= -2.5351  
 XY= -0.2709 YY= 16.5827 ZY= 1.3369  
 XZ= -2.3574 YZ= 1.3035 ZZ= 32.4839  
 Eigenvalues: 16.4712 21.7462 33.1526

## Isomer 5 (conformer 2)

1 C Isotropic = 58.2350 Anisotropy = 144.6445

XX= -26.7606 YX= 46.2242 ZX= -2.6005

XY= 46.9579 YY= 140.5741 ZY= 14.7647

XZ= 1.2334 YZ= 13.8237 ZZ= 60.8916

Eigenvalues: -39.0412 59.0816 154.6647

2 C Isotropic = 47.1173 Anisotropy = 114.0147

XX= 55.0996 YX= 20.1649 ZX= -21.9665

XY= 21.9182 YY= 112.7318 ZY= 32.1197

XZ= -26.3382 YZ= 29.6479 ZZ= -26.4795

Eigenvalues: -41.2811 59.5060 123.1271

3 C Isotropic = 70.1107 Anisotropy = 125.4076

XX= 48.5506 YX= 18.0395 ZX= 39.8035

XY= 17.0292 YY= 147.3699 ZY= 14.8951

XZ= 33.5600 YZ= 14.4879 ZZ= 14.4115

Eigenvalues: -9.0362 65.6525 153.7157

4 C Isotropic = 47.1073 Anisotropy = 140.8919

XX= -22.3960 YX= 34.6600 ZX= -0.6935

XY= 36.9933 YY= 130.0088 ZY= 19.8765

XZ= 0.0605 YZ= 17.1681 ZZ= 33.7090

Eigenvalues: -30.7001 30.9867 141.0352

5 C Isotropic = 58.9151 Anisotropy = 164.4865

XX= 25.8291 YX= 35.6454 ZX= 1.0912

XY= 32.4003 YY= 156.7464 ZY= 24.7660

XZ= -1.6949 YZ= 26.3000 ZZ= -5.8302

Eigenvalues: -10.7385 18.9110 168.5728

6 C Isotropic = 58.4189 Anisotropy = 174.3631

XX= 2.7371 YX= 39.2921 ZX= 38.2940

XY= 35.1269 YY= 164.5901 ZY= 7.4929

XZ= 41.8744 YZ= 10.7960 ZZ= 7.9295

Eigenvalues: -37.1418 37.7375 174.6610

7 N Isotropic = 113.0387 Anisotropy = 90.3384

XX= 67.8133 YX= 17.3686 ZX= 41.8094

XY= 23.2004 YY= 167.4385 ZY= 3.2260

XZ= 31.3587 YZ= 3.5899 ZZ= 103.8644

Eigenvalues: 43.1070 122.7448 173.2643

8 C Isotropic = 59.0996 Anisotropy = 118.8516

XX= 41.5891 YX= 26.0849 ZX= -23.0637

XY= 25.6853 YY= 129.3668 ZY= 20.2110

XZ= -34.3896 YZ= 26.9125 ZZ= 6.3430

Eigenvalues: -17.3350 56.2999 138.3341

9 C Isotropic = 76.4673 Anisotropy = 105.1177

XX= 73.0929 YX= 16.9115 ZX= -12.8068

XY= 15.8704 YY= 141.2182 ZY= 14.8815

XZ= -5.4182 YZ= 18.6898 ZZ= 15.0907

Eigenvalues: 10.8373 72.0188 146.5457

10 C Isotropic = 14.1038 Anisotropy = 121.1774

XX= 37.5959 YX= -41.7493 ZX= -10.3378

XY= -34.3734 YY= 65.1350 ZY= -37.0605

XZ= 1.6286 YZ= -21.3570 ZZ= -60.4194

Eigenvalues: -68.4906 15.9133 94.8888

11 Br Isotropic = 1892.6799 Anisotropy = 1578.6932

XX= 1587.5157 YX= -140.1998 ZX= 457.5140

XY= -139.3066 YY= 1404.7692 ZY= -343.3600

XZ= 479.0600 YZ= -333.1047 ZZ= 2685.7548

Eigenvalues: 1316.0264 1416.8712 2945.1420

12 C Isotropic = 91.9441 Anisotropy = 47.3074

XX= 94.8140 YX= -28.3794 ZX= -29.6903

XY= -26.5274 YY= 96.9297 ZY= -28.5155  
 XZ= -33.1442 YZ= -33.9405 ZZ= 84.0887  
 Eigenvalues: 31.2604 121.0896 123.4824  
 13 C Isotropic = 26.2983 Anisotropy = 136.0775  
 XX= 42.8869 YX= -43.0724 ZX= 50.6271  
 XY= -52.6572 YY= 83.5281 ZY= 15.4223  
 XZ= 25.6298 YZ= -4.8788 ZZ= -47.5200  
 Eigenvalues: -64.8869 26.7652 117.0167  
 14 N Isotropic = -121.7287 Anisotropy = 258.7258  
 XX= -115.4139 YX= -97.7507 ZX= 96.0632  
 XY= -131.8624 YY= -36.0646 ZY= 19.0073  
 XZ= 82.8043 YZ= 24.0146 ZZ= -213.7076  
 Eigenvalues: -293.1047 -122.8366 50.7551  
 15 O Isotropic = -56.5839 Anisotropy = 267.1007  
 XX= -61.0311 YX= -120.3451 ZX= 30.4805  
 XY= -125.0769 YY= 31.4983 ZY= -40.1130  
 XZ= 24.7309 YZ= -10.5561 ZZ= -140.2191  
 Eigenvalues: -153.8349 -137.4001 121.4832  
 16 C Isotropic = 62.2035 Anisotropy = 102.1254  
 XX= 71.6778 YX= -33.4566 ZX= 4.0901  
 XY= -33.0520 YY= 110.6587 ZY= -8.2868  
 XZ= 11.6285 YZ= -2.2879 ZZ= 4.2739  
 Eigenvalues: 3.3465 52.9769 130.2871  
 17 N Isotropic = 97.1765 Anisotropy = 126.3546  
 XX= 60.0717 YX= -70.4373 ZX= -20.9915  
 XY= -74.4073 YY= 138.0132 ZY= -13.9737  
 XZ= -22.8107 YZ= -19.8267 ZZ= 93.4445  
 Eigenvalues: 7.9668 102.1497 181.4129  
 18 C Isotropic = 63.8532 Anisotropy = 119.5533  
 XX= 75.8720 YX= -36.4792 ZX= 24.4795  
 XY= -35.6181 YY= 123.5161 ZY= 2.5244  
 XZ= 17.6500 YZ= -2.1383 ZZ= -7.8287  
 Eigenvalues: -13.4164 61.4205 143.5554  
 19 C Isotropic = 72.6837 Anisotropy = 133.5454  
 XX= 46.4920 YX= -63.0905 ZX= 28.8324  
 XY= -61.3044 YY= 127.3847 ZY= 6.1017  
 XZ= 31.9970 YZ= 8.5519 ZZ= 44.1745  
 Eigenvalues: -5.7131 62.0503 161.7140  
 20 C Isotropic = 69.3065 Anisotropy = 145.8343  
 XX= 59.2501 YX= -62.9848 ZX= -19.1870  
 XY= -66.0259 YY= 127.1875 ZY= -18.7307  
 XZ= -18.3701 YZ= -21.6045 ZZ= 21.4819  
 Eigenvalues: -5.7693 47.1594 166.5294  
 21 I Isotropic = 3880.2533 Anisotropy = 1637.7240  
 XX= 4034.1419 YX= 471.5326 ZX= 542.8786  
 XY= 513.5265 YY= 4181.0492 ZY= 454.5954  
 XZ= 632.2375 YZ= 512.4581 ZZ= 3425.5688  
 Eigenvalues: 3037.6802 3631.0104 4972.0693  
 22 H Isotropic = 24.1217 Anisotropy = 10.6474  
 XX= 22.8706 YX= -0.9741 ZX= -1.2433  
 XY= -1.2855 YY= 18.9899 ZY= -2.7644  
 XZ= -1.8381 YZ= -2.2157 ZZ= 30.5046  
 Eigenvalues: 18.0461 23.0990 31.2200  
 23 H Isotropic = 24.0937 Anisotropy = 9.7247  
 XX= 27.8188 YX= -2.5062 ZX= 2.3816  
 XY= -2.5917 YY= 18.5739 ZY= -2.0799  
 XZ= 2.8915 YZ= -2.1934 ZZ= 25.8884  
 Eigenvalues: 17.6470 24.0574 30.5768

24 H Isotropic = 23.5881 Anisotropy = 11.7840  
 XX= 22.7286 YX= -1.4588 ZX= 2.5791  
 XY= -2.3198 YY= 21.9154 ZY= -6.8554  
 XZ= 1.8479 YZ= -5.3641 ZZ= 26.1202  
 Eigenvalues: 17.5424 21.7777 31.4441

25 H Isotropic = 23.7852 Anisotropy = 9.9273  
 XX= 28.2380 YX= -1.7169 ZX= -3.0596  
 XY= -1.5165 YY= 16.1789 ZY= -1.2286  
 XZ= -2.3847 YZ= -1.3475 ZZ= 26.9386  
 Eigenvalues: 15.7172 25.2349 30.4034

26 H Isotropic = 24.0988 Anisotropy = 5.9854  
 XX= 27.1016 YX= -0.4168 ZX= -0.8727  
 XY= -1.7112 YY= 19.4012 ZY= -0.0745  
 XZ= -1.9907 YZ= -0.4371 ZZ= 25.7934  
 Eigenvalues: 19.2255 24.9817 28.0891

27 H Isotropic = 22.7088 Anisotropy = 7.9351  
 XX= 24.6770 YX= 5.6130 ZX= 0.6089  
 XY= 5.5280 YY= 17.9840 ZY= 0.7475  
 XZ= -0.0297 YZ= 0.8806 ZZ= 25.4653  
 Eigenvalues: 14.8020 25.3255 27.9988

28 H Isotropic = 24.6663 Anisotropy = 3.5809  
 XX= 24.6283 YX= 1.8396 ZX= 0.3125  
 XY= 1.8387 YY= 22.3510 ZY= 0.6629  
 XZ= -0.8339 YZ= 0.0129 ZZ= 27.0196  
 Eigenvalues: 21.2954 25.6499 27.0535

29 H Isotropic = 25.1411 Anisotropy = 3.3692  
 XX= 25.0387 YX= 1.5134 ZX= -0.3038  
 XY= 1.5970 YY= 23.0996 ZY= 0.2486  
 XZ= -0.6478 YZ= 0.1055 ZZ= 27.2849  
 Eigenvalues: 22.2070 25.8290 27.3872

30 H Isotropic = 23.7515 Anisotropy = 13.8266  
 XX= 22.1935 YX= 2.2987 ZX= -4.3412  
 XY= 2.3447 YY= 17.8772 ZY= -0.3988  
 XZ= -4.2363 YZ= 0.1074 ZZ= 31.1839  
 Eigenvalues: 16.6591 21.6262 32.9692



### Isomer 5 (conformer 3)

1 C Isotropic = 56.3539 Anisotropy = 146.2137

XX= -42.3167 YX= -0.9838 ZX= 0.5535

XY= -1.4231 YY= 153.7467 ZY= -2.6304

XZ= 2.9528 YZ= -2.7413 ZZ= 57.6317

Eigenvalues: -42.3543 57.5863 153.8297

2 C Isotropic = 46.0911 Anisotropy = 115.6868

XX= 42.6483 YX= -1.4769 ZX= -33.8206

XY= -1.7721 YY= 123.0537 ZY= -5.0509

XZ= -37.8713 YZ= -4.7402 ZZ= -27.4285

Eigenvalues: -42.6757 57.7335 123.2157

3 C Isotropic = 70.3197 Anisotropy = 124.8086

XX= 50.9839 YX= 0.5340 ZX= 33.6769

XY= 0.6428 YY= 153.3975 ZY= -4.4679

XZ= 29.1412 YZ= -4.1644 ZZ= 6.5777

Eigenvalues: -9.7868 67.2205 153.5254

4 C Isotropic = 47.2533 Anisotropy = 139.9383

XX= -30.6775 YX= -0.4441 ZX= 0.3003

XY= -0.5604 YY= 140.4580 ZY= -3.0619

XZ= 1.6878 YZ= -3.0453 ZZ= 31.9796

Eigenvalues: -30.6945 31.9090 140.5455

5 C Isotropic = 58.8620 Anisotropy = 161.7933

XX= 20.3964 YX= -0.7810 ZX= -7.1359

XY= -0.0243 YY= 166.5853 ZY= -5.0164

XZ= -8.7297 YZ= -4.8940 ZZ= -10.3958

Eigenvalues: -12.4540 22.3157 166.7242

6 C Isotropic = 57.9294 Anisotropy = 172.7576

XX= 1.4596 YX= 0.2212 ZX= 35.0102

XY= 1.0964 YY= 172.9966 ZY= -3.7340

XZ= 39.6478 YZ= -4.7748 ZZ= -0.6680

Eigenvalues: -37.0070 37.6941 173.1011

7 N Isotropic = 112.5752 Anisotropy = 87.8332

XX= 71.0453 YX= 0.8554 ZX= 43.2506

XY= 0.2474 YY= 171.0635 ZY= -2.2388

XZ= 37.4738 YZ= -2.1051 ZZ= 95.6169

Eigenvalues: 41.1172 125.4777 171.1307

8 C Isotropic = 60.0441 Anisotropy = 120.8647

XX= 26.6985 YX= -0.8875 ZX= -20.1641

XY= -0.2967 YY= 140.4412 ZY= -5.7263

XZ= -32.4181 YZ= -3.8050 ZZ= 12.9926

Eigenvalues: -7.4397 46.9514 140.6205

9 C Isotropic = 75.4226 Anisotropy = 108.2403

XX= 56.7556 YX= -0.6544 ZX= -17.9612

XY= -0.3069 YY= 147.4936 ZY= -2.9765

XZ= -9.8471 YZ= -3.7130 ZZ= 22.0185

Eigenvalues: 17.0544 61.6305 147.5828

10 C Isotropic = 15.3226 Anisotropy = 120.4529

XX= -25.4707 YX= 6.8386 ZX= 44.8935

XY= 5.1203 YY= 95.2812 ZY= -4.6189

XZ= 24.9240 YZ= -3.4131 ZZ= -23.8427

Eigenvalues: -59.8983 10.2416 95.6245

11 Br Isotropic = 1891.6161 Anisotropy = 1574.8139

XX= 1709.8824 YX= 20.7026 ZX= 598.5304

XY= 18.7279 YY= 1325.4750 ZY= 40.9650

XZ= 617.8576 YZ= 43.2215 ZZ= 2639.4908

Eigenvalues: 1324.1273 1409.2288 2941.4920

12 C Isotropic = 104.7817 Anisotropy = 50.0496

XX= 53.4824 YX= 3.9744 ZX= 11.1808

XY= 2.8520 YY= 125.2494 ZY= 2.7805  
 XZ= 16.8317 YZ= -0.5756 ZZ= 135.6133  
 Eigenvalues: 51.0227 125.1743 138.1481  
 13 C Isotropic = 28.2496 Anisotropy = 133.6186  
 XX= 28.5850 YX= 4.1247 ZX= -3.1772  
 XY= 4.8479 YY= 117.0559 ZY= -2.5478  
 XZ= 26.6110 YZ= -4.3437 ZZ= -60.8919  
 Eigenvalues: -62.4895 29.9097 117.3287  
 14 N Isotropic = -126.2430 Anisotropy = 257.1768  
 XX= -122.5381 YX= 6.8014 ZX= -30.9534  
 XY= 8.4885 YY= 44.7158 ZY= -6.0720  
 XZ= -19.4255 YZ= -5.6746 ZZ= -300.9068  
 Eigenvalues: -304.4610 -119.4762 45.2082  
 15 O Isotropic = -48.3414 Anisotropy = 279.7114  
 XX= -132.2610 YX= 11.9971 ZX= 11.9678  
 XY= 9.5263 YY= 137.6107 ZY= -5.7635  
 XZ= -5.2643 YZ= -4.9120 ZZ= -150.3739  
 Eigenvalues: -151.1543 -132.0028 138.1329  
 16 C Isotropic = 61.8902 Anisotropy = 98.5355  
 XX= 37.4686 YX= 6.0393 ZX= -35.0841  
 XY= 6.1158 YY= 127.1341 ZY= 0.5764  
 XZ= -29.6613 YZ= 0.0704 ZZ= 21.0677  
 Eigenvalues: -4.2483 62.3383 127.5805  
 17 N Isotropic = 93.4051 Anisotropy = 141.1206  
 XX= 10.2582 YX= 13.0671 ZX= 15.9366  
 XY= 12.6511 YY= 186.4922 ZY= -4.0049  
 XZ= 17.6212 YZ= -3.3984 ZZ= 83.4649  
 Eigenvalues: 5.6100 87.1199 187.4855  
 18 C Isotropic = 65.5146 Anisotropy = 114.8975  
 XX= 51.1679 YX= 6.1800 ZX= -24.3873  
 XY= 6.4431 YY= 141.6330 ZY= -0.5211  
 XZ= -35.2217 YZ= 0.0117 ZZ= 3.7430  
 Eigenvalues: -10.6727 65.1036 142.1130  
 19 C Isotropic = 72.1481 Anisotropy = 138.0788  
 XX= 51.7412 YX= 8.4944 ZX= 20.0097  
 XY= 8.7510 YY= 163.4837 ZY= -4.5706  
 XZ= 22.4143 YZ= -4.6390 ZZ= 1.2194  
 Eigenvalues: -6.8176 59.0613 164.2006  
 20 C Isotropic = 70.2980 Anisotropy = 139.6367  
 XX= -1.2341 YX= 11.7192 ZX= -13.9828  
 XY= 11.6760 YY= 162.5019 ZY= -1.9352  
 XZ= -11.7961 YZ= -1.2587 ZZ= 49.6262  
 Eigenvalues: -5.0386 52.5435 163.3891  
 21 I Isotropic = 3902.7654 Anisotropy = 1465.0050  
 XX= 4859.7187 YX= -61.6855 ZX= 191.3424  
 XY= -93.6725 YY= 3749.9964 ZY= -33.3768  
 XZ= 126.1248 YZ= -2.9084 ZZ= 3098.5810  
 Eigenvalues: 3084.2007 3744.6600 4879.4354  
 22 H Isotropic = 24.0399 Anisotropy = 10.0404  
 XX= 23.3939 YX= -0.0277 ZX= -0.5324  
 XY= 0.0020 YY= 18.0731 ZY= 0.3867  
 XZ= -0.8994 YZ= 0.3563 ZZ= 30.6527  
 Eigenvalues: 18.0621 23.3241 30.7335  
 23 H Isotropic = 24.1094 Anisotropy = 10.4584  
 XX= 29.1061 YX= 0.1141 ZX= 2.9007  
 XY= 0.1285 YY= 17.5441 ZY= 0.2384  
 XZ= 3.6255 YZ= 0.2309 ZZ= 25.6778  
 Eigenvalues: 17.5373 23.7091 31.0816

24 H Isotropic = 22.8288 Anisotropy = 10.6271  
 XX= 25.8044 YX= 0.0380 ZX= 3.1658  
 XY= 0.0856 YY= 15.5825 ZY= 0.5145  
 XZ= 3.6148 YZ= 0.3663 ZZ= 27.0995  
 Eigenvalues: 15.5652 23.0077 29.9136  
 25 H Isotropic = 23.8137 Anisotropy = 8.9618  
 XX= 27.6348 YX= -0.0530 ZX= -2.0487  
 XY= -0.0922 YY= 15.3545 ZY= 0.2826  
 XZ= -1.3333 YZ= 0.3086 ZZ= 28.4517  
 Eigenvalues: 15.3477 26.3051 29.7882  
 26 H Isotropic = 23.0785 Anisotropy = 15.2666  
 XX= 21.9678 YX= -0.0762 ZX= 1.7549  
 XY= -0.0177 YY= 14.0261 ZY= 0.0078  
 XZ= -0.9444 YZ= -0.0318 ZZ= 33.2417  
 Eigenvalues: 14.0258 21.9535 33.2563  
 27 H Isotropic = 21.5057 Anisotropy = 20.9076  
 XX= 23.1753 YX= -0.9744 ZX= -6.0743  
 XY= -1.0510 YY= 8.5480 ZY= 0.5186  
 XZ= -5.2543 YZ= 0.4937 ZZ= 32.7936  
 Eigenvalues: 8.4777 20.5952 35.4441  
 28 H Isotropic = 24.6926 Anisotropy = 4.3582  
 XX= 25.5454 YX= -0.3018 ZX= 0.4493  
 XY= -0.2854 YY= 20.9511 ZY= 0.0697  
 XZ= -0.7880 YZ= 0.1589 ZZ= 27.5812  
 Eigenvalues: 20.9308 25.5488 27.5980  
 29 H Isotropic = 25.1053 Anisotropy = 2.5938  
 XX= 26.2454 YX= -0.2568 ZX= -0.0106  
 XY= -0.2572 YY= 22.3627 ZY= 0.0479  
 XZ= -0.5164 YZ= 0.1147 ZZ= 26.7079  
 Eigenvalues: 22.3448 26.1366 26.8345  
 30 H Isotropic = 24.1713 Anisotropy = 4.9234  
 XX= 25.2270 YX= -0.3265 ZX= -0.9182  
 XY= -0.4050 YY= 20.0223 ZY= 0.2964  
 XZ= -0.3254 YZ= 0.1704 ZZ= 27.2646  
 Eigenvalues: 19.9917 25.0687 27.4536

### Isomer 5 (conformer 4)

1 C Isotropic = 58.1308 Anisotropy = 144.7861

XX= -20.4765 YX= 55.6502 ZX= -5.9121

XY= 56.9678 YY= 135.5866 ZY= 11.6008

XZ= -2.0633 YZ= 10.1272 ZZ= 59.2825

Eigenvalues: -39.1911 58.9288 154.6549

2 C Isotropic = 46.9559 Anisotropy = 114.2061

XX= 58.2340 YX= 22.0946 ZX= -19.8387

XY= 23.8138 YY= 112.8961 ZY= 26.4116

XZ= -24.4935 YZ= 24.0504 ZZ= -30.2623

Eigenvalues: -41.3735 59.1479 123.0933

3 C Isotropic = 69.8076 Anisotropy = 126.0100

XX= 49.2641 YX= 26.0478 ZX= 39.8199

XY= 24.3073 YY= 146.0332 ZY= 5.9949

XZ= 33.4305 YZ= 5.8890 ZZ= 14.1254

Eigenvalues: -9.4010 65.0095 153.8142

4 C Isotropic = 46.9887 Anisotropy = 140.6894

XX= -17.7335 YX= 43.1503 ZX= -2.4870

XY= 44.9377 YY= 126.9735 ZY= 15.0697

XZ= -2.0262 YZ= 12.3531 ZZ= 31.7261

Eigenvalues: -30.6466 30.8311 140.7816

5 C Isotropic = 59.0295 Anisotropy = 164.9638

XX= 30.2126 YX= 43.3351 ZX= 0.5388

XY= 39.8900 YY= 155.0649 ZY= 15.1976

XZ= -2.1432 YZ= 17.4984 ZZ= -8.1892

Eigenvalues: -10.5962 18.6792 169.0053

6 C Isotropic = 59.0649 Anisotropy = 173.4855

XX= 8.3416 YX= 50.7266 ZX= 35.9036

XY= 47.4802 YY= 159.7010 ZY= -4.1866

XZ= 40.3271 YZ= -0.0902 ZZ= 9.1522

Eigenvalues: -36.6048 39.0777 174.7220

7 N Isotropic = 112.8106 Anisotropy = 91.3514

XX= 69.0305 YX= 25.8666 ZX= 40.1764

XY= 30.6198 YY= 165.0314 ZY= -1.6787

XZ= 29.4555 YZ= -1.4588 ZZ= 104.3698

Eigenvalues: 42.5094 122.2108 173.7115

8 C Isotropic = 58.8360 Anisotropy = 119.1923

XX= 45.4050 YX= 29.5433 ZX= -23.1077

XY= 28.1617 YY= 128.6199 ZY= 14.7139

XZ= -33.6674 YZ= 22.0022 ZZ= 2.4830

Eigenvalues: -17.6733 55.8837 138.2975

9 C Isotropic = 76.6723 Anisotropy = 104.9109

XX= 76.0346 YX= 19.5532 ZX= -12.4940

XY= 19.7091 YY= 140.6923 ZY= 8.0740

XZ= -4.6355 YZ= 12.2955 ZZ= 13.2899

Eigenvalues: 10.8500 72.5541 146.6129

10 C Isotropic = 14.3823 Anisotropy = 122.0103

XX= 34.5841 YX= -41.3501 ZX= -6.3956

XY= -32.0697 YY= 65.8701 ZY= -41.4067

XZ= 6.7498 YZ= -27.5247 ZZ= -57.3072

Eigenvalues: -67.1852 14.6097 95.7225

11 Br Isotropic = 1889.5416 Anisotropy = 1584.7678

XX= 1555.4075 YX= -124.4128 ZX= 432.9667

XY= -118.4845 YY= 1379.6776 ZY= -296.3816

XZ= 451.3107 YZ= -295.4928 ZZ= 2733.5397

Eigenvalues: 1310.0788 1412.4925 2946.0535

12 C Isotropic = 96.0925 Anisotropy = 53.1279

XX= 97.1825 YX= -28.2354 ZX= -35.3455

XY= -27.9089 YY= 97.4713 ZY= -26.2266  
 XZ= -36.7528 YZ= -33.9108 ZZ= 93.6238  
 Eigenvalues: 33.0462 123.7203 131.5111  
 13 C Isotropic = 27.5521 Anisotropy = 134.8191  
 XX= 40.2580 YX= -37.9548 ZX= 52.5873  
 XY= -48.3185 YY= 87.8971 ZY= 4.7545  
 XZ= 29.9852 YZ= -13.8731 ZZ= -45.4988  
 Eigenvalues: -63.1815 28.4063 117.4315  
 14 N Isotropic = -134.1493 Anisotropy = 270.9130  
 XX= -141.1385 YX= -93.5734 ZX= 112.0278  
 XY= -121.8686 YY= -29.2909 ZY= 0.4563  
 XZ= 104.4953 YZ= 14.3029 ZZ= -232.0184  
 Eigenvalues: -320.5029 -128.4043 46.4593  
 15 O Isotropic = -62.9461 Anisotropy = 279.8805  
 XX= -82.7672 YX= -124.4113 ZX= 33.4400  
 XY= -117.8929 YY= 40.4701 ZY= -49.8058  
 XZ= 36.7687 YZ= -21.8813 ZZ= -146.5413  
 Eigenvalues: -167.2781 -145.2011 123.6409  
 16 C Isotropic = 61.8194 Anisotropy = 99.2207  
 XX= 39.5878 YX= -54.3300 ZX= 28.8099  
 XY= -55.6745 YY= 89.6867 ZY= 1.8182  
 XZ= 24.5400 YZ= -0.7454 ZZ= 56.1838  
 Eigenvalues: -4.5227 62.0145 127.9665  
 17 N Isotropic = 92.6787 Anisotropy = 143.0131  
 XX= 95.1769 YX= -68.7469 ZX= -17.2910  
 XY= -69.8572 YY= 128.9487 ZY= -43.4286  
 XZ= -17.9361 YZ= -44.8394 ZZ= 53.9105  
 Eigenvalues: 4.3185 85.6967 188.0207  
 18 C Isotropic = 65.1407 Anisotropy = 115.6292  
 XX= 47.7861 YX= -57.2255 ZX= 34.7304  
 XY= -57.0116 YY= 102.8695 ZY= 0.8155  
 XZ= 43.7096 YZ= 7.0996 ZZ= 44.7666  
 Eigenvalues: -11.2119 64.4072 142.2269  
 19 C Isotropic = 72.0227 Anisotropy = 137.9710  
 XX= 87.5796 YX= -46.2782 ZX= 28.4991  
 XY= -46.6476 YY= 126.9375 ZY= -19.7118  
 XZ= 26.2850 YZ= -20.3557 ZZ= 1.5510  
 Eigenvalues: -6.7869 58.8516 164.0034  
 20 C Isotropic = 70.6785 Anisotropy = 139.9563  
 XX= 54.3340 YX= -76.0158 ZX= 1.1850  
 XY= -74.6559 YY= 105.2367 ZY= -28.1435  
 XZ= -1.7799 YZ= -28.0858 ZZ= 52.4648  
 Eigenvalues: -4.8411 52.8938 163.9827  
 21 I Isotropic = 3906.2577 Anisotropy = 1601.9022  
 XX= 4085.1490 YX= 505.9012 ZX= 559.6843  
 XY= 494.5723 YY= 4202.2663 ZY= 377.7424  
 XZ= 636.4444 YZ= 445.0612 ZZ= 3431.3578  
 Eigenvalues: 3065.0735 3679.5071 4974.1925  
 22 H Isotropic = 24.1385 Anisotropy = 10.6214  
 XX= 22.7686 YX= -1.2516 ZX= -1.4054  
 XY= -1.6414 YY= 18.9405 ZY= -2.0698  
 XZ= -1.9548 YZ= -1.4395 ZZ= 30.7066  
 Eigenvalues: 18.0669 23.1293 31.2195  
 23 H Isotropic = 24.0870 Anisotropy = 9.7256  
 XX= 27.3993 YX= -2.8941 ZX= 2.3992  
 XY= -2.9392 YY= 18.6911 ZY= -1.9320  
 XZ= 2.9718 YZ= -1.9725 ZZ= 26.1707  
 Eigenvalues: 17.6490 24.0413 30.5707

24 H Isotropic = 23.7431 Anisotropy = 11.5941  
 XX= 22.6557 YX= -1.4493 ZX= 2.2284  
 XY= -2.2157 YY= 21.6602 ZY= -6.6068  
 XZ= 1.7358 YZ= -5.0267 ZZ= 26.9134  
 Eigenvalues: 17.8538 21.9030 31.4725

25 H Isotropic = 23.7511 Anisotropy = 9.8611  
 XX= 27.9835 YX= -2.6031 ZX= -2.9782  
 XY= -2.3406 YY= 16.3439 ZY= -0.4706  
 XZ= -2.2889 YZ= -0.6281 ZZ= 26.9259  
 Eigenvalues: 15.7351 25.1930 30.3252

26 H Isotropic = 24.1076 Anisotropy = 5.9701  
 XX= 27.0167 YX= -0.8958 ZX= -0.8203  
 XY= -2.2871 YY= 19.6080 ZY= 0.2144  
 XZ= -1.8537 YZ= 0.0098 ZZ= 25.6982  
 Eigenvalues: 19.2765 24.9587 28.0877

27 H Isotropic = 21.4517 Anisotropy = 20.9140  
 XX= 17.1604 YX= 5.0167 ZX= -3.5181  
 XY= 5.3341 YY= 12.7397 ZY= 2.9603  
 XZ= -3.9959 YZ= 2.9128 ZZ= 34.4552  
 Eigenvalues: 8.5283 20.4325 35.3944

28 H Isotropic = 24.6738 Anisotropy = 4.4026  
 XX= 24.5373 YX= 2.0084 ZX= -1.7744  
 XY= 2.1867 YY= 22.4308 ZY= 0.0298  
 XZ= -0.7251 YZ= 0.8373 ZZ= 27.0534  
 Eigenvalues: 20.9603 25.4523 27.6089

29 H Isotropic = 25.1329 Anisotropy = 2.5856  
 XX= 25.0321 YX= 1.5473 ZX= -0.6375  
 XY= 1.6728 YY= 23.6415 ZY= 0.4263  
 XZ= -0.2529 YZ= 0.7654 ZZ= 26.7251  
 Eigenvalues: 22.4540 26.0881 26.8566

30 H Isotropic = 24.1909 Anisotropy = 4.7395  
 XX= 23.8008 YX= 1.9818 ZX= -0.8604  
 XY= 2.0196 YY= 21.7667 ZY= 1.1788  
 XZ= -1.3022 YZ= 0.5721 ZZ= 27.0054  
 Eigenvalues: 20.2817 24.9405 27.3506

## Isomer 6 (conformer 1)

1 C Isotropic = 57.2696 Anisotropy = 144.1232  
XX= 51.2138 YX= 13.7178 ZX= 31.4704  
XY= 13.3677 YY= 149.1287 ZY= 16.0790  
XZ= 33.7598 YZ= 16.0752 ZZ= -28.5337  
Eigenvalues: -40.7742 59.2312 153.3517

2 C Isotropic = 46.9545 Anisotropy = 112.9178  
XX= -37.2473 YX= 25.6251 ZX= 9.7885  
XY= 26.9290 YY= 117.0491 ZY= 5.3769  
XZ= 6.1204 YZ= 6.4128 ZZ= 61.0615  
Eigenvalues: -42.0606 60.6909 122.2330

3 C Isotropic = 70.7946 Anisotropy = 123.5821  
XX= 36.5097 YX= 24.0444 ZX= -33.1236  
XY= 24.3391 YY= 146.5292 ZY= 20.4019  
XZ= -37.3768 YZ= 21.4440 ZZ= 29.3450  
Eigenvalues: -8.9917 68.1929 153.1827

4 C Isotropic = 47.0799 Anisotropy = 141.8484  
XX= 26.9586 YX= 17.2718 ZX= 21.0192  
XY= 16.6968 YY= 136.8435 ZY= 15.8536  
XZ= 22.2412 YZ= 16.0120 ZZ= -22.5622  
Eigenvalues: -31.1768 30.7711 141.6456

5 C Isotropic = 58.0845 Anisotropy = 162.9018  
XX= -6.7179 YX= 30.1820 ZX= -0.6771  
XY= 30.2876 YY= 159.0794 ZY= 19.4341  
XZ= -2.4256 YZ= 17.8754 ZZ= 21.8919  
Eigenvalues: -12.7541 20.3219 166.6857

6 C Isotropic = 56.3390 Anisotropy = 174.6488  
XX= 25.1825 YX= 28.5661 ZX= -26.3662  
XY= 26.3797 YY= 164.7021 ZY= 29.1863  
XZ= -22.4449 YZ= 27.2437 ZZ= -20.8677  
Eigenvalues: -38.1562 34.4016 172.7715

7 N Isotropic = 114.9693 Anisotropy = 83.6796  
XX= 124.4054 YX= 10.2001 ZX= -16.9522  
XY= 11.2352 YY= 166.9120 ZY= 15.7112  
XZ= -23.9150 YZ= 18.0431 ZZ= 53.5904  
Eigenvalues: 45.1193 129.0329 170.7556

8 C Isotropic = 58.9320 Anisotropy = 123.4866  
XX= -2.5807 YX= 22.3492 ZX= 25.6102  
XY= 25.2575 YY= 135.8851 ZY= 7.4385  
XZ= 12.3535 YZ= 9.6395 ZZ= 43.4917  
Eigenvalues: -12.0436 47.5833 141.2564

9 C Isotropic = 75.1203 Anisotropy = 110.1574  
XX= 19.3422 YX= 23.9365 ZX= -6.1147  
XY= 22.1027 YY= 143.0605 ZY= 12.2256  
XZ= 1.8226 YZ= 10.4069 ZZ= 62.9582  
Eigenvalues: 14.8391 61.9632 148.5585

10 C Isotropic = 23.5095 Anisotropy = 133.7380  
XX= -49.5200 YX= 27.0695 ZX= -9.3530  
XY= 33.0173 YY= 104.5472 ZY= 17.1835  
XZ= -39.5206 YZ= 22.7844 ZZ= 15.5013  
Eigenvalues: -64.8812 22.7416 112.6682

11 Br Isotropic = 1907.8323 Anisotropy = 1566.0076  
XX= 2890.8508 YX= -234.8794 ZX= -196.4375  
XY= -246.8226 YY= 1376.6187 ZY= 18.1739

XZ= -178.5464 YZ= 15.8394 ZZ= 1456.0275  
 Eigenvalues: 1337.7454 1433.9143 2951.8374  
 12 C Isotropic = 100.9029 Anisotropy = 39.7278  
 XX= 99.7223 YX= -3.1498 ZX= 40.8234  
 XY= -2.9193 YY= 125.8233 ZY= 0.7037  
 XZ= 31.6684 YZ= 3.5746 ZZ= 77.1630  
 Eigenvalues: 50.3179 125.0027 127.3881  
 13 C Isotropic = 20.7308 Anisotropy = 121.4629  
 XX= -47.3749 YX= 21.9306 ZX= 13.6010  
 XY= 17.4426 YY= 96.5882 ZY= 13.2034  
 XZ= 34.4797 YZ= 9.6822 ZZ= 12.9792  
 Eigenvalues: -57.2415 17.7279 101.7061  
 14 O Isotropic = -31.5018 Anisotropy = 246.6559  
 XX= -103.8351 YX= 38.5354 ZX= -4.0175  
 XY= 35.1432 YY= 119.7340 ZY= 44.1430  
 XZ= 12.7875 YZ= 39.7461 ZZ= -110.4043  
 Eigenvalues: -118.3016 -109.1392 132.9355  
 15 N Isotropic = -123.7620 Anisotropy = 254.6614  
 XX= -227.9521 YX= 56.9453 ZX= -74.0740  
 XY= 58.7758 YY= 28.1651 ZY= 48.6832  
 XZ= -91.0643 YZ= 52.0404 ZZ= -171.4988  
 Eigenvalues: -304.5263 -112.7718 46.0123  
 16 C Isotropic = 62.9349 Anisotropy = 100.9709  
 XX= 38.4369 YX= 17.5519 ZX= -15.8002  
 XY= 18.8039 YY= 123.1650 ZY= 21.7617  
 XZ= -24.1215 YZ= 23.2352 ZZ= 27.2029  
 Eigenvalues: 5.0091 53.5468 130.2488  
 17 N Isotropic = 97.2311 Anisotropy = 125.9963  
 XX= 78.8044 YX= 8.3905 ZX= 41.3118  
 XY= 8.0405 YY= 176.0576 ZY= 20.6204  
 XZ= 46.1347 YZ= 20.0024 ZZ= 36.8314  
 Eigenvalues: 8.3205 102.1442 181.2286  
 18 C Isotropic = 62.8064 Anisotropy = 120.7486  
 XX= 16.9809 YX= 26.4423 ZX= -34.0746  
 XY= 25.1989 YY= 134.4749 ZY= 25.6958  
 XZ= -27.3673 YZ= 24.3477 ZZ= 36.9635  
 Eigenvalues: -13.8930 59.0068 143.3055  
 19 C Isotropic = 71.4906 Anisotropy = 134.8672  
 XX= -2.0680 YX= 23.3228 ZX= 13.8729  
 XY= 24.0180 YY= 154.4997 ZY= 16.5345  
 XZ= 10.4138 YZ= 16.9427 ZZ= 62.0401  
 Eigenvalues: -6.9348 60.0046 161.4021  
 20 C Isotropic = 69.2876 Anisotropy = 143.8705  
 XX= 47.4418 YX= 16.3961 ZX= 12.5168  
 XY= 16.6575 YY= 157.2587 ZY= 28.2822  
 XZ= 11.6895 YZ= 28.4596 ZZ= 3.1622  
 Eigenvalues: -3.5552 46.2167 165.2012  
 21 I Isotropic = 3884.4938 Anisotropy = 1464.2134  
 XX= 3382.9709 YX= 172.2218 ZX= -676.0309  
 XY= 175.2429 YY= 3703.8166 ZY= -54.6166  
 XZ= -605.2804 YZ= -65.9318 ZZ= 4566.6939  
 Eigenvalues: 3073.3151 3719.5302 4860.6361  
 22 H Isotropic = 24.1101 Anisotropy = 10.0053  
 XX= 29.0044 YX= -2.2007 ZX= 2.8371  
 XY= -2.1958 YY= 18.6623 ZY= -1.2568



XZ= 2.4555 YZ= -1.2304 ZZ= 24.6636  
 Eigenvalues: 18.1325 23.4175 30.7803  
 23 H Isotropic = 24.1540 Anisotropy = 10.4963  
 XX= 27.9463 YX= -1.2680 ZX= -4.0851  
 XY= -1.3400 YY= 17.8829 ZY= -0.4522  
 XZ= -3.4541 YZ= -0.5295 ZZ= 26.6329  
 Eigenvalues: 17.5969 23.7137 31.1516  
 24 H Isotropic = 22.7971 Anisotropy = 10.3999  
 XX= 28.5978 YX= -2.0176 ZX= -2.4769  
 XY= -2.1046 YY= 15.9771 ZY= -0.7521  
 XZ= -2.1427 YZ= -0.7168 ZZ= 23.8165  
 Eigenvalues: 15.5003 23.1607 29.7304  
 25 H Isotropic = 23.9472 Anisotropy = 9.0560  
 XX= 27.0812 YX= -2.0796 ZX= 1.0273  
 XY= -2.1219 YY= 16.0254 ZY= -1.7673  
 XZ= 1.6512 YZ= -1.9012 ZZ= 28.7349  
 Eigenvalues: 15.4528 26.4043 29.9845  
 26 H Isotropic = 22.6877 Anisotropy = 16.3030  
 XX= 32.3122 YX= -3.2780 ZX= 4.0026  
 XY= -2.9683 YY= 13.5894 ZY= -1.6291  
 XZ= 1.3777 YZ= -1.3151 ZZ= 22.1614  
 Eigenvalues: 12.9632 21.5435 33.5564  
 27 H Isotropic = 22.8687 Anisotropy = 7.6809  
 XX= 26.5965 YX= -1.6681 ZX= -1.4024  
 XY= -1.7382 YY= 15.2392 ZY= -2.1163  
 XZ= -1.1785 YZ= -2.0382 ZZ= 26.7703  
 Eigenvalues: 14.5743 26.0424 27.9893  
 28 H Isotropic = 24.6024 Anisotropy = 3.6532  
 XX= 26.3151 YX= -0.8275 ZX= -0.0867  
 XY= -1.0609 YY= 21.3623 ZY= -0.9254  
 XZ= 1.0351 YZ= -1.0921 ZZ= 26.1298  
 Eigenvalues: 21.0251 25.7443 27.0379  
 29 H Isotropic = 25.0577 Anisotropy = 3.3524  
 XX= 26.6095 YX= -0.7917 ZX= 0.3175  
 XY= -0.8790 YY= 22.3091 ZY= -0.8231  
 XZ= 0.7862 YZ= -0.8913 ZZ= 26.2545  
 Eigenvalues: 22.0196 25.8608 27.2926  
 30 H Isotropic = 23.8180 Anisotropy = 13.5638  
 XX= 30.0061 YX= -2.7653 ZX= 4.1063  
 XY= -2.7608 YY= 17.5853 ZY= -1.8831  
 XZ= 4.2970 YZ= -1.8901 ZZ= 23.8624  
 Eigenvalues: 16.8284 21.7650 32.8605

## Isomer 6 (conformer 2)

1 C Isotropic = 58.8705 Anisotropy = 143.3086  
XX= 46.2553 YX= -19.3554 ZX= 28.0016  
XY= -21.0965 YY= 129.3892 ZY= 61.3259  
XZ= 31.5171 YZ= 60.8883 ZZ= 0.9669  
Eigenvalues: -38.1477 60.3496 154.4095

2 C Isotropic = 47.6485 Anisotropy = 111.9776  
XX= -39.3595 YX= -12.4471 ZX= -4.7187  
XY= -13.4441 YY= 113.7240 ZY= 19.6644  
XZ= -9.0391 YZ= 19.3743 ZZ= 68.5812  
Eigenvalues: -40.7020 61.3474 122.3003

3 C Isotropic = 70.1046 Anisotropy = 124.7752  
XX= 37.5394 YX= 2.3665 ZX= -34.0676  
XY= 3.4250 YY= 140.0683 ZY= 37.3749  
XZ= -40.3409 YZ= 40.0673 ZZ= 32.7062  
Eigenvalues: -8.6257 65.6515 153.2881

4 C Isotropic = 46.7661 Anisotropy = 141.7542  
XX= 20.4001 YX= -15.5671 ZX= 17.9037  
XY= -17.3356 YY= 122.2464 ZY= 51.5157  
XZ= 17.9316 YZ= 50.6407 ZZ= -2.3481  
Eigenvalues: -30.5670 29.5965 141.2690

5 C Isotropic = 57.5271 Anisotropy = 169.0457  
XX= -9.7569 YX= -10.9839 ZX= -7.7466  
XY= -6.7187 YY= 150.7939 ZY= 49.8062  
XZ= -9.5928 YZ= 51.8359 ZZ= 31.5444  
Eigenvalues: -11.5208 13.8779 170.2242

6 C Isotropic = 59.1666 Anisotropy = 173.5453  
XX= 29.7520 YX= 2.0884 ZX= -28.1053  
XY= 6.5666 YY= 149.1617 ZY= 66.6199  
XZ= -25.3977 YZ= 67.3657 ZZ= -1.4137  
Eigenvalues: -37.4147 40.0511 174.8635

7 N Isotropic = 115.4283 Anisotropy = 86.8783  
XX= 123.4597 YX= -0.5747 ZX= -9.5658  
XY= -0.0078 YY= 157.6919 ZY= 42.9050  
XZ= -20.4213 YZ= 37.5028 ZZ= 65.1335  
Eigenvalues: 47.5403 125.3975 173.3472

8 C Isotropic = 59.6554 Anisotropy = 113.9075  
XX= -12.3215 YX= -17.7514 ZX= 17.1348  
XY= -8.4888 YY= 123.1678 ZY= 30.6958  
XZ= 8.9208 YZ= 26.2771 ZZ= 68.1199  
Eigenvalues: -16.6732 60.0456 135.5937

9 C Isotropic = 75.4366 Anisotropy = 109.3177  
XX= 8.2491 YX= -0.5600 ZX= -16.5251  
XY= 1.7049 YY= 138.3767 ZY= 27.2948  
XZ= -9.4656 YZ= 24.5779 ZZ= 79.6840  
Eigenvalues: 5.7517 72.2430 148.3151

10 C Isotropic = 21.1716 Anisotropy = 132.6559  
XX= -2.6634 YX= 25.2449 ZX= -74.9411  
XY= 41.3605 YY= 78.3420 ZY= -15.8519  
XZ= -53.0092 YZ= -31.6310 ZZ= -12.1637  
Eigenvalues: -71.7665 25.6724 109.6089

11 Br Isotropic = 1898.7868 Anisotropy = 1575.0805  
XX= 2934.2854 YX= 153.9088 ZX= -16.4597  
XY= 150.7629 YY= 1346.9405 ZY= -29.6368

XZ= 2.2025 YZ= -35.9557 ZZ= 1415.1347  
 Eigenvalues: 1321.5245 1425.9955 2948.8405  
 12 C Isotropic = 94.9092 Anisotropy = 41.0205  
 XX= 108.7368 YX= 17.0781 ZX= 15.7793  
 XY= 25.9646 YY= 87.9964 ZY= -30.0907  
 XZ= 26.5477 YZ= -37.2870 ZZ= 87.9943  
 Eigenvalues: 40.8808 121.5905 122.2562  
 13 C Isotropic = 19.6016 Anisotropy = 122.3422  
 XX= 28.6364 YX= 28.7970 ZX= -18.9956  
 XY= 20.1633 YY= 57.0517 ZY= -62.9328  
 XZ= -34.5712 YZ= -49.1511 ZZ= -26.8833  
 Eigenvalues: -57.1043 14.7460 101.1631  
 14 O Isotropic = -43.9763 Anisotropy = 258.7315  
 XX= -70.7602 YX= 86.7152 ZX= -41.9584  
 XY= 97.1897 YY= 19.7093 ZY= -103.9784  
 XZ= -47.7381 YZ= -84.6535 ZZ= -80.8780  
 Eigenvalues: -140.9726 -119.4676 128.5114  
 15 N Isotropic = -129.3858 Anisotropy = 259.8454  
 XX= -206.5532 YX= 74.1811 ZX= -121.5852  
 XY= 95.9291 YY= -21.9683 ZY= -21.7870  
 XZ= -117.3816 YZ= -44.1148 ZZ= -159.6359  
 Eigenvalues: -312.4067 -119.5952 43.8444  
 16 C Isotropic = 62.7535 Anisotropy = 101.2968  
 XX= 28.4389 YX= 36.4272 ZX= -31.0812  
 XY= 40.6937 YY= 99.4065 ZY= -19.5291  
 XZ= -24.8805 YZ= -22.9142 ZZ= 60.4151  
 Eigenvalues: 5.2592 52.7166 130.2847  
 17 N Isotropic = 97.9084 Anisotropy = 126.3683  
 XX= 94.4047 YX= 54.1271 ZX= 18.0045  
 XY= 51.6254 YY= 123.5416 ZY= -63.8028  
 XZ= 14.7542 YZ= -61.0798 ZZ= 75.7789  
 Eigenvalues: 8.6726 102.8986 182.1539  
 18 C Isotropic = 62.6639 Anisotropy = 120.4501  
 XX= 25.0559 YX= 38.4742 ZX= -44.4226  
 XY= 35.7713 YY= 112.9279 ZY= -22.9836  
 XZ= -50.3008 YZ= -20.8549 ZZ= 50.0080  
 Eigenvalues: -13.7643 58.7921 142.9640  
 19 C Isotropic = 71.4730 Anisotropy = 135.5607  
 XX= 71.5094 YX= 28.0145 ZX= -37.0880  
 XY= 29.4164 YY= 121.0031 ZY= -51.0750  
 XZ= -34.2670 YZ= -52.5992 ZZ= 21.9065  
 Eigenvalues: -7.0908 59.6630 161.8468  
 20 C Isotropic = 69.1777 Anisotropy = 144.9301  
 XX= 39.1673 YX= 60.7397 ZX= -8.7463  
 XY= 60.6294 YY= 108.1347 ZY= -52.1789  
 XZ= -5.4075 YZ= -50.6913 ZZ= 60.2311  
 Eigenvalues: -4.1492 45.8846 165.7978  
 21 I Isotropic = 3878.7920 Anisotropy = 1564.7990  
 XX= 3760.6913 YX= -470.0250 ZX= -630.2524  
 XY= -483.7515 YY= 4278.0730 ZY= 415.4025  
 XZ= -625.2054 YZ= 397.7913 ZZ= 3597.6115  
 Eigenvalues: 3046.0554 3668.3292 4921.9913  
 22 H Isotropic = 24.2206 Anisotropy = 10.4475  
 XX= 29.3700 YX= 0.2704 ZX= 3.8122  
 XY= 0.9970 YY= 19.0824 ZY= -1.9217

XZ= 3.2911 YZ= -1.7195 ZZ= 24.2094  
 Eigenvalues: 18.2071 23.2691 31.1856  
 23 H Isotropic = 24.0946 Anisotropy = 9.7424  
 XX= 28.3267 YX= 2.0656 ZX= -2.8090  
 XY= 1.9924 YY= 18.6836 ZY= -2.6708  
 XZ= -2.2993 YZ= -2.6565 ZZ= 25.2735  
 Eigenvalues: 17.6242 24.0701 30.5895  
 24 H Isotropic = 23.8142 Anisotropy = 11.3016  
 XX= 28.8163 YX= 4.2618 ZX= -0.0662  
 XY= 5.9935 YY= 20.8633 ZY= -0.4110  
 XZ= -0.6469 YZ= -0.1201 ZZ= 21.7630  
 Eigenvalues: 18.3490 21.7450 31.3486  
 25 H Isotropic = 23.8889 Anisotropy = 9.9926  
 XX= 25.7106 YX= 0.2323 ZX= 1.3166  
 XY= -0.0784 YY= 17.0148 ZY= -3.6353  
 XZ= 2.0435 YZ= -3.8718 ZZ= 28.9413  
 Eigenvalues: 15.9015 25.2145 30.5506  
 26 H Isotropic = 24.2038 Anisotropy = 5.5796  
 XX= 25.2201 YX= -0.2320 ZX= 0.5549  
 XY= -0.2791 YY= 20.2284 ZY= -3.1194  
 XZ= 0.0896 YZ= -1.5272 ZZ= 27.1628  
 Eigenvalues: 19.5180 25.1698 27.9235  
 27 H Isotropic = 22.9303 Anisotropy = 7.4278  
 XX= 24.4713 YX= -4.1457 ZX= 1.3708  
 XY= -4.0890 YY= 19.1766 ZY= 4.3377  
 XZ= 1.0052 YZ= 4.4248 ZZ= 25.1430  
 Eigenvalues: 14.9909 25.9178 27.8821  
 28 H Isotropic = 24.6010 Anisotropy = 3.6729  
 XX= 25.9163 YX= -1.5370 ZX= 1.8177  
 XY= -1.9499 YY= 22.6627 ZY= 1.1000  
 XZ= 0.8203 YZ= 1.5509 ZZ= 25.2238  
 Eigenvalues: 21.1458 25.6075 27.0496  
 29 H Isotropic = 25.0719 Anisotropy = 3.3788  
 XX= 26.2040 YX= -1.3667 ZX= 1.4811  
 XY= -1.4788 YY= 23.3598 ZY= 1.0221  
 XZ= 1.1255 YZ= 1.1250 ZZ= 25.6519  
 Eigenvalues: 22.1168 25.7744 27.3244  
 30 H Isotropic = 23.8532 Anisotropy = 13.3192  
 XX= 26.7408 YX= -2.2574 ZX= 6.3355  
 XY= -1.9213 YY= 18.7300 ZY= 1.2040  
 XZ= 6.1905 YZ= 0.8893 ZZ= 26.0888  
 Eigenvalues: 17.1018 21.7252 32.7326

## Isomer 6 (conformer 3)

1 C Isotropic = 56.9931 Anisotropy = 144.7005

XX= 52.0896 YX= 15.2340 ZX= 31.0228

XY= 14.9245 YY= 147.8879 ZY= 19.0722

XZ= 33.4140 YZ= 19.2317 ZZ= -28.9981

Eigenvalues: -41.1702 58.6895 153.4601

2 C Isotropic = 46.6606 Anisotropy = 113.1693

XX= -36.0356 YX= 28.7692 ZX= 11.8009

XY= 29.9447 YY= 115.4822 ZY= 6.0713

XZ= 8.1083 YZ= 7.1569 ZZ= 60.5352

Eigenvalues: -42.2422 60.1172 122.1068

3 C Isotropic = 71.0583 Anisotropy = 123.3893

XX= 37.0818 YX= 27.1098 ZX= -32.0859

XY= 27.6728 YY= 144.6479 ZY= 23.3061

XZ= -36.3256 YZ= 24.2899 ZZ= 31.4452

Eigenvalues: -8.5578 68.4149 153.3179

4 C Isotropic = 47.1137 Anisotropy = 141.9452

XX= 28.1103 YX= 19.1228 ZX= 21.2836

XY= 18.4178 YY= 135.5188 ZY= 18.7222

XZ= 22.3405 YZ= 18.7676 ZZ= -22.2881

Eigenvalues: -31.1839 30.7811 141.7438

5 C Isotropic = 57.9650 Anisotropy = 162.8847

XX= -5.8026 YX= 33.5730 ZX= 0.5807

XY= 33.8219 YY= 156.8399 ZY= 22.1095

XZ= -1.1316 YZ= 20.3917 ZZ= 22.8577

Eigenvalues: -13.0903 20.4305 166.5548

6 C Isotropic = 56.0378 Anisotropy = 175.5714

XX= 25.2041 YX= 32.2976 ZX= -25.5487

XY= 30.0539 YY= 162.5592 ZY= 33.2282

XZ= -21.6778 YZ= 31.3954 ZZ= -19.6499

Eigenvalues: -38.7012 33.7292 173.0854

7 N Isotropic = 115.4854 Anisotropy = 83.1974

XX= 124.7076 YX= 11.5898 ZX= -17.3692

XY= 12.7269 YY= 165.9326 ZY= 18.0622

XZ= -24.1080 YZ= 20.6080 ZZ= 55.8159

Eigenvalues: 46.0432 129.4626 170.9503

8 C Isotropic = 60.0117 Anisotropy = 121.5947

XX= 0.6206 YX= 24.0210 ZX= 27.7137

XY= 27.3641 YY= 134.4817 ZY= 8.1508

XZ= 14.1131 YZ= 10.7412 ZZ= 44.9327

Eigenvalues: -10.6613 49.6215 141.0748

9 C Isotropic = 74.6959 Anisotropy = 110.8595

XX= 19.6042 YX= 26.7959 ZX= -4.9124

XY= 24.5522 YY= 141.6104 ZY= 13.8480

XZ= 3.2513 YZ= 11.8862 ZZ= 62.8731

Eigenvalues: 14.1841 61.3013 148.6023

10 C Isotropic = 24.5948 Anisotropy = 132.1921

XX= -48.6534 YX= 30.5776 ZX= -6.3784

XY= 37.3254 YY= 102.3642 ZY= 18.4861

XZ= -36.9438 YZ= 24.6039 ZZ= 20.0737

Eigenvalues: -63.9449 25.0065 112.7229

11 Br Isotropic = 1902.9764 Anisotropy = 1572.1415

XX= 2873.5452 YX= -264.8975 ZX= -220.1561

XY= -275.6255 YY= 1378.7575 ZY= 24.1903

XZ= -202.9025 YZ= 21.5514 ZZ= 1456.6263  
 Eigenvalues: 1329.4161 1428.4423 2951.0707  
 12 C Isotropic = 105.8437 Anisotropy = 48.3257  
 XX= 111.7378 YX= -6.1490 ZX= 42.1997  
 XY= -5.1820 YY= 125.8986 ZY= 0.1547  
 XZ= 33.4105 YZ= 3.1030 ZZ= 79.8945  
 Eigenvalues: 54.5119 124.9582 138.0608  
 13 C Isotropic = 20.4867 Anisotropy = 122.9206  
 XX= -46.8706 YX= 24.4984 ZX= 16.6308  
 XY= 20.4622 YY= 95.8932 ZY= 14.1252  
 XZ= 32.7650 YZ= 11.3683 ZZ= 12.4375  
 Eigenvalues: -57.7066 16.7330 102.4338  
 14 O Isotropic = -41.6837 Anisotropy = 254.8558  
 XX= -119.6805 YX= 45.8669 ZX= 0.3161  
 XY= 42.2811 YY= 110.9774 ZY= 48.7516  
 XZ= 10.4420 YZ= 45.2428 ZZ= -116.3479  
 Eigenvalues: -130.0295 -123.2417 128.2202  
 15 N Isotropic = -126.6053 Anisotropy = 263.5257  
 XX= -235.1444 YX= 66.4995 ZX= -71.1456  
 XY= 68.8171 YY= 25.4400 ZY= 56.3279  
 XZ= -91.8608 YZ= 59.2875 ZZ= -170.1115  
 Eigenvalues: -313.4886 -115.4058 49.0785  
 16 C Isotropic = 62.1738 Anisotropy = 99.2220  
 XX= 11.5134 YX= 18.3158 ZX= 20.2318  
 XY= 17.7180 YY= 123.0219 ZY= 10.3721  
 XZ= 25.8896 YZ= 9.4182 ZZ= 51.9861  
 Eigenvalues: -0.2094 58.4090 128.3218  
 17 N Isotropic = 94.8844 Anisotropy = 135.5917  
 XX= 90.6954 YX= 14.6432 ZX= 16.9165  
 XY= 14.7315 YY= 177.1218 ZY= 28.4645  
 XZ= 13.7595 YZ= 29.2287 ZZ= 16.8360  
 Eigenvalues: 9.8026 89.5717 185.2788  
 18 C Isotropic = 63.1712 Anisotropy = 117.6186  
 XX= -8.6863 YX= 25.4297 ZX= 16.8291  
 XY= 27.3920 YY= 134.1981 ZY= 11.5338  
 XZ= 6.1243 YZ= 13.4458 ZZ= 64.0018  
 Eigenvalues: -14.4846 62.4146 141.5836  
 19 C Isotropic = 71.5951 Anisotropy = 138.3401  
 XX= 25.6835 YX= 31.1070 ZX= -25.7934  
 XY= 31.0971 YY= 152.4904 ZY= 28.7774  
 XZ= -24.8399 YZ= 28.6916 ZZ= 36.6114  
 Eigenvalues: -6.0222 56.9857 163.8219  
 20 C Isotropic = 68.8486 Anisotropy = 142.4366  
 XX= 40.0030 YX= 18.3874 ZX= 27.8775  
 XY= 18.6110 YY= 155.8036 ZY= 23.6263  
 XZ= 27.2090 YZ= 23.6312 ZZ= 10.7394  
 Eigenvalues: -6.5838 49.3234 163.8064  
 21 I Isotropic = 3930.2297 Anisotropy = 1444.2212  
 XX= 3407.8600 YX= 211.2940 ZX= -671.1509  
 XY= 202.4096 YY= 3780.6085 ZY= -55.6520  
 XZ= -595.4085 YZ= -68.1640 ZZ= 4602.2207  
 Eigenvalues: 3094.1124 3803.5329 4893.0439  
 22 H Isotropic = 24.0882 Anisotropy = 10.0092  
 XX= 28.9546 YX= -2.4843 ZX= 2.7101  
 XY= -2.4563 YY= 18.8017 ZY= -1.4280

XZ= 2.3299 YZ= -1.3729 ZZ= 24.5084  
 Eigenvalues: 18.1209 23.3828 30.7610  
 23 H Isotropic = 24.1576 Anisotropy = 10.4783  
 XX= 27.8123 YX= -1.3865 ZX= -4.1166  
 XY= -1.4773 YY= 17.9559 ZY= -0.5307  
 XZ= -3.4957 YZ= -0.6236 ZZ= 26.7048  
 Eigenvalues: 17.5949 23.7349 31.1432  
 24 H Isotropic = 22.7800 Anisotropy = 10.3604  
 XX= 28.3912 YX= -2.1960 ZX= -2.5976  
 XY= -2.2980 YY= 16.1094 ZY= -0.8416  
 XZ= -2.3034 YZ= -0.8030 ZZ= 23.8394  
 Eigenvalues: 15.5183 23.1348 29.6869  
 25 H Isotropic = 23.9703 Anisotropy = 9.0727  
 XX= 27.0556 YX= -2.3370 ZX= 0.9740  
 XY= -2.3933 YY= 16.2192 ZY= -2.0275  
 XZ= 1.6046 YZ= -2.1717 ZZ= 28.6361  
 Eigenvalues: 15.4771 26.4151 30.0188  
 26 H Isotropic = 22.8910 Anisotropy = 16.1130  
 XX= 32.2865 YX= -3.6871 ZX= 3.8406  
 XY= -3.3512 YY= 14.1650 ZY= -1.8107  
 XZ= 1.2299 YZ= -1.4523 ZZ= 22.2216  
 Eigenvalues: 13.3531 21.6870 33.6330  
 27 H Isotropic = 21.5943 Anisotropy = 20.0183  
 XX= 27.7170 YX= -4.7446 ZX= 5.6517  
 XY= -4.8513 YY= 10.6762 ZY= -4.4149  
 XZ= 6.4863 YZ= -4.5778 ZZ= 26.3897  
 Eigenvalues: 8.8934 20.9497 34.9398  
 28 H Isotropic = 24.6090 Anisotropy = 4.2917  
 XX= 26.8818 YX= -1.3856 ZX= 1.1536  
 XY= -1.1470 YY= 21.2197 ZY= -1.1482  
 XZ= -0.1229 YZ= -0.9033 ZZ= 25.7253  
 Eigenvalues: 20.7843 25.5724 27.4701  
 29 H Isotropic = 25.0941 Anisotropy = 2.7232  
 XX= 26.4949 YX= -0.9129 ZX= 0.4712  
 XY= -0.8183 YY= 22.5077 ZY= -0.8599  
 XZ= -0.0989 YZ= -0.7442 ZZ= 26.2798  
 Eigenvalues: 22.1904 26.1824 26.9096  
 30 H Isotropic = 24.2417 Anisotropy = 5.4664  
 XX= 26.5120 YX= -1.4230 ZX= 0.9533  
 XY= -1.5321 YY= 20.4615 ZY= -1.2567  
 XZ= 1.3966 YZ= -1.3510 ZZ= 25.7516  
 Eigenvalues: 19.9365 24.9025 27.8860

## Isomer 6 (conformer 4)

1 C Isotropic = 58.8437 Anisotropy = 143.5225  
XX= 57.4106 YX= -22.6355 ZX= 15.2603  
XY= -23.7803 YY= 133.6668 ZY= 54.5772  
XZ= 19.0175 YZ= 54.4625 ZZ= -14.5464  
Eigenvalues: -38.3110 60.3167 154.5253

2 C Isotropic = 47.4141 Anisotropy = 112.3502  
XX= -33.6053 YX= -31.2584 ZX= 5.9896  
XY= -32.9629 YY= 110.7048 ZY= 18.1153  
XZ= 1.8589 YZ= 17.2744 ZZ= 65.1428  
Eigenvalues: -40.9689 60.8970 122.3143

3 C Isotropic = 69.8906 Anisotropy = 125.1282  
XX= 29.7639 YX= -12.8173 ZX= -37.8260  
XY= -12.3007 YY= 144.3466 ZY= 23.3708  
XZ= -44.4470 YZ= 24.8254 ZZ= 35.5613  
Eigenvalues: -8.9377 65.3000 153.3093

4 C Isotropic = 46.8085 Anisotropy = 141.9566  
XX= 28.7925 YX= -23.4164 ZX= 9.0417  
XY= -25.1075 YY= 125.1421 ZY= 43.7531  
XZ= 9.3235 YZ= 42.8687 ZZ= -13.5091  
Eigenvalues: -30.1927 29.1720 141.4462

5 C Isotropic = 57.4175 Anisotropy = 169.1949  
XX= -6.4930 YX= -29.6589 ZX= -8.5220  
XY= -25.8967 YY= 153.7396 ZY= 39.4760  
XZ= -10.6642 YZ= 41.2188 ZZ= 25.0060  
Eigenvalues: -11.4602 13.4986 170.2141

6 C Isotropic = 59.7330 Anisotropy = 172.8000  
XX= 24.1084 YX= -13.0484 ZX= -39.4973  
XY= -8.6486 YY= 159.0460 ZY= 47.1584  
XZ= -36.6464 YZ= 48.5030 ZZ= -3.9553  
Eigenvalues: -36.5431 40.8091 174.9330

7 N Isotropic = 115.3496 Anisotropy = 87.6016  
XX= 119.1917 YX= -4.2281 ZX= -21.3039  
XY= -3.7948 YY= 163.5555 ZY= 33.0669  
XZ= -31.0962 YZ= 25.3349 ZZ= 63.3014  
Eigenvalues: 47.1489 125.1491 173.7507

8 C Isotropic = 59.6650 Anisotropy = 114.0521  
XX= -3.4987 YX= -32.2702 ZX= 22.7897  
XY= -23.1006 YY= 122.5509 ZY= 29.3698  
XZ= 13.6568 YZ= 25.2388 ZZ= 59.9428  
Eigenvalues: -16.8272 60.1226 135.6997

9 C Isotropic = 75.5321 Anisotropy = 109.2439  
XX= 8.3423 YX= -18.6960 ZX= -11.0798  
XY= -15.7455 YY= 140.2498 ZY= 20.0222  
XZ= -4.1753 YZ= 19.0504 ZZ= 78.0043  
Eigenvalues: 5.7587 72.4763 148.3614

10 C Isotropic = 22.2831 Anisotropy = 130.6776  
XX= -19.8351 YX= -0.8928 ZX= -72.0585  
XY= 19.1074 YY= 78.9272 ZY= -36.9283  
XZ= -48.7516 YZ= -48.1539 ZZ= 7.7571  
Eigenvalues: -70.7331 28.1808 109.4015

11 Br Isotropic = 1898.4110 Anisotropy = 1582.6376  
XX= 2848.0408 YX= 351.4588 ZX= -192.9778  
XY= 346.7747 YY= 1404.7844 ZY= -71.5831



XZ= -176.1062 YZ= -73.3262 ZZ= 1442.4079  
 Eigenvalues: 1316.3179 1425.4125 2953.5028  
 12 C Isotropic = 99.2860 Anisotropy = 49.8514  
 XX= 112.8091 YX= 18.0363 ZX= 20.2829  
 XY= 27.7920 YY= 88.4025 ZY= -29.6963  
 XZ= 32.9001 YZ= -32.3047 ZZ= 96.6464  
 Eigenvalues: 43.6950 121.6427 132.5203  
 13 C Isotropic = 18.9452 Anisotropy = 124.0922  
 XX= 16.5451 YX= 15.1032 ZX= -18.4608  
 XY= 6.1339 YY= 50.2092 ZY= -73.9472  
 XZ= -31.3202 YZ= -64.4847 ZZ= -9.9187  
 Eigenvalues: -58.4513 13.6136 101.6734  
 14 O Isotropic = -54.5609 Anisotropy = 265.0704  
 XX= -113.3164 YX= 54.3839 ZX= -37.5443  
 XY= 64.6255 YY= 14.5445 ZY= -126.3617  
 XZ= -41.2460 YZ= -112.2348 ZZ= -64.9108  
 Eigenvalues: -151.3750 -134.4604 122.1527  
 15 N Isotropic = -132.5450 Anisotropy = 268.6333  
 XX= -257.4788 YX= 25.4721 ZX= -116.7136  
 XY= 48.6472 YY= -11.3318 ZY= -59.3243  
 XZ= -107.0376 YZ= -82.6422 ZZ= -128.8245  
 Eigenvalues: -322.2446 -121.9343 46.5438  
 16 C Isotropic = 62.2964 Anisotropy = 100.1156  
 XX= 63.0545 YX= 12.9409 ZX= -15.1704  
 XY= 10.7164 YY= 84.3628 ZY= -57.8649  
 XZ= -19.9665 YZ= -56.0476 ZZ= 39.4720  
 Eigenvalues: -0.3289 58.1781 129.0401  
 17 N Isotropic = 94.5784 Anisotropy = 136.0897  
 XX= 50.4453 YX= 52.0224 ZX= 5.4587  
 XY= 54.0773 YY= 124.7895 ZY= -58.3372  
 XZ= 9.8258 YZ= -57.7280 ZZ= 108.5005  
 Eigenvalues: 9.2885 89.1419 185.3049  
 18 C Isotropic = 63.0273 Anisotropy = 118.2907  
 XX= 56.6241 YX= 1.3445 ZX= -41.2945  
 XY= 7.9646 YY= 96.3469 ZY= -60.6339  
 XZ= -32.5647 YZ= -62.8635 ZZ= 36.1108  
 Eigenvalues: -14.7693 61.9633 141.8878  
 19 C Isotropic = 71.7478 Anisotropy = 137.9432  
 XX= 14.2372 YX= 24.4634 ZX= -40.7496  
 XY= 24.3006 YY= 123.1352 ZY= -45.4453  
 XZ= -41.4316 YZ= -45.6116 ZZ= 77.8711  
 Eigenvalues: -5.9475 57.4810 163.7099  
 20 C Isotropic = 69.4205 Anisotropy = 142.5901  
 XX= 44.5018 YX= 42.3426 ZX= -0.6167  
 XY= 42.3732 YY= 99.9823 ZY= -70.1437  
 XZ= 0.3121 YZ= -71.0178 ZZ= 63.7776  
 Eigenvalues: -6.2510 50.0320 164.4806  
 21 I Isotropic = 3921.4883 Anisotropy = 1531.2993  
 XX= 3798.6746 YX= -568.2029 ZX= -648.0380  
 XY= -522.3454 YY= 4244.6222 ZY= 275.5069  
 XZ= -673.8844 YZ= 306.4580 ZZ= 3721.1681  
 Eigenvalues: 3068.9267 3753.1837 4942.3546  
 22 H Isotropic = 24.1960 Anisotropy = 10.4339  
 XX= 29.6498 YX= 1.9337 ZX= 3.3317  
 XY= 2.5511 YY= 19.2392 ZY= -1.1630

XZ= 2.7073 YZ= -0.9682 ZZ= 23.6989  
 Eigenvalues: 18.2134 23.2226 31.1519  
 23 H Isotropic = 24.0836 Anisotropy = 9.7479  
 XX= 27.0360 YX= 2.7834 ZX= -2.8797  
 XY= 2.7541 YY= 18.9065 ZY= -2.7085  
 XZ= -2.3696 YZ= -2.6120 ZZ= 26.3082  
 Eigenvalues: 17.6418 24.0268 30.5821  
 24 H Isotropic = 23.8291 Anisotropy = 11.1547  
 XX= 27.0326 YX= 5.0623 ZX= -1.0558  
 XY= 6.5381 YY= 22.3457 ZY= -1.1569  
 XZ= -1.7471 YZ= -0.8163 ZZ= 22.1090  
 Eigenvalues: 18.4331 21.7886 31.2655  
 25 H Isotropic = 23.8154 Anisotropy = 9.9760  
 XX= 25.8968 YX= 1.3793 ZX= 1.9848  
 XY= 1.1956 YY= 16.5465 ZY= -2.2456  
 XZ= 2.7853 YZ= -2.5393 ZZ= 29.0028  
 Eigenvalues: 15.8066 25.1735 30.4661  
 26 H Isotropic = 24.1990 Anisotropy = 5.6296  
 XX= 25.2240 YX= 0.4771 ZX= 1.1560  
 XY= 0.4048 YY= 19.9186 ZY= -2.3760  
 XZ= 0.3628 YZ= -0.8891 ZZ= 27.4544  
 Eigenvalues: 19.5194 25.1255 27.9521  
 27 H Isotropic = 21.6429 Anisotropy = 19.6539  
 XX= 31.5679 YX= -2.9947 ZX= 7.1158  
 XY= -2.9827 YY= 13.6799 ZY= 4.9062  
 XZ= 6.6512 YZ= 4.6935 ZZ= 19.6811  
 Eigenvalues: 9.3058 20.8775 34.7455  
 28 H Isotropic = 24.5885 Anisotropy = 4.3424  
 XX= 26.4078 YX= -1.1503 ZX= 1.0724  
 XY= -0.2649 YY= 22.5611 ZY= 2.3704  
 XZ= 2.1538 YZ= 1.9367 ZZ= 24.7966  
 Eigenvalues: 20.8636 25.4185 27.4835  
 29 H Isotropic = 25.1032 Anisotropy = 2.6960  
 XX= 26.4873 YX= -0.9943 ZX= 0.6173  
 XY= -0.5747 YY= 23.6860 ZY= 1.7448  
 XZ= 1.0905 YZ= 1.5082 ZZ= 25.1364  
 Eigenvalues: 22.3258 26.0833 26.9006  
 30 H Isotropic = 24.2803 Anisotropy = 5.2743  
 XX= 26.9250 YX= -0.8298 ZX= 2.0269  
 XY= -1.1533 YY= 21.8214 ZY= 1.8392  
 XZ= 1.5625 YZ= 1.8963 ZZ= 24.0945  
 Eigenvalues: 20.2957 24.7487 27.7965

## Isomer 7 (conformer 1)

1 C Isotropic = 56.2147 Anisotropy = 146.6191

XX= 42.0012 YX= 46.0439 ZX= 44.9147

XY= 46.6089 YY= 134.7886 ZY= -19.5845

XZ= 42.2643 YZ= -17.8962 ZZ= -8.1456

Eigenvalues: -42.5654 57.2488 153.9608

2 C Isotropic = 46.2622 Anisotropy = 115.5214

XX= 42.3980 YX= 32.8718 ZX= -44.0648

XY= 32.7427 YY= 109.9636 ZY= 16.9194

XZ= -40.5487 YZ= 15.8861 ZZ= -13.5751

Eigenvalues: -42.3796 57.8897 123.2764

3 C Isotropic = 70.3969 Anisotropy = 124.8127

XX= 14.7915 YX= 56.5887 ZX= -11.6021

XY= 56.5274 YY= 130.5579 ZY= 3.9633

XZ= -7.2652 YZ= 2.5976 ZZ= 65.8415

Eigenvalues: -9.5722 67.1575 153.6054

4 C Isotropic = 47.0099 Anisotropy = 138.9095

XX= 29.9578 YX= 45.3448 ZX= 28.1624

XY= 46.4997 YY= 120.3849 ZY= -11.4824

XZ= 26.3157 YZ= -11.6532 ZZ= -9.3130

Eigenvalues: -30.5368 31.9503 139.6162

5 C Isotropic = 59.6673 Anisotropy = 162.6985

XX= 30.5273 YX= 56.6480 ZX= -16.4686

XY= 55.7256 YY= 145.1906 ZY= 6.4610

XZ= -15.4234 YZ= 6.1144 ZZ= 3.2839

Eigenvalues: -11.8396 22.7085 168.1330

6 C Isotropic = 58.4864 Anisotropy = 172.5195

XX= -4.9535 YX= 72.9579 ZX= 13.8016

XY= 73.4648 YY= 143.4618 ZY= -4.3549

XZ= 8.9765 YZ= -3.9028 ZZ= 36.9508

Eigenvalues: -36.9712 38.9309 173.4994

7 N Isotropic = 111.5959 Anisotropy = 89.4817

XX= 65.8722 YX= 43.6341 ZX= 21.6431

XY= 40.5180 YY= 154.4412 ZY= -9.2026

XZ= 28.6349 YZ= -12.2059 ZZ= 114.4743

Eigenvalues: 39.1625 124.3749 171.2504

8 C Isotropic = 59.9962 Anisotropy = 119.6866

XX= 54.2764 YX= 34.8226 ZX= -21.4530

XY= 26.4483 YY= 128.7994 ZY= 5.2405

XZ= -10.3658 YZ= 3.5402 ZZ= -3.0874

Eigenvalues: -8.3427 48.5439 139.7872

9 C Isotropic = 76.1568 Anisotropy = 108.8366

XX= 60.3159 YX= 35.7012 ZX= -15.7638

XY= 34.7455 YY= 134.6792 ZY= 6.7849

XZ= -24.5261 YZ= 9.5723 ZZ= 33.4753

Eigenvalues: 17.2133 62.5426 148.7145

10 C Isotropic = 16.5680 Anisotropy = 123.6574

XX= -34.2580 YX= 46.9325 ZX= -3.5644

XY= 47.6541 YY= 82.0437 ZY= 3.3887

XZ= 19.7662 YZ= -0.8243 ZZ= 1.9183

Eigenvalues: -52.0256 2.7233 99.0063

11 Br Isotropic = 1885.9428 Anisotropy = 1576.8179

XX= 1704.8448 YX= -155.8422 ZX= 613.1009

XY= -153.4682 YY= 1374.4529 ZY= -238.5470

XZ= 593.7409 YZ= -234.3579 ZZ= 2578.5306

Eigenvalues: 1313.3476 1407.3260 2937.1547

12 C Isotropic = 73.5635 Anisotropy = 77.7692

XX= 50.8479 YX= 21.9272 ZX= 28.3615

XY= 21.0831 YY= 119.2040 ZY= -10.5588  
 XZ= 20.2287 YZ= -2.5356 ZZ= 50.6387  
 Eigenvalues: 22.3053 72.9757 125.4097  
 13 C Isotropic = 26.9646 Anisotropy = 79.0596  
 XX= -6.5180 YX= 31.6506 ZX= -41.9472  
 XY= 41.0427 YY= 64.3430 ZY= 17.5818  
 XZ= -69.8283 YZ= 29.4219 ZZ= 23.0687  
 Eigenvalues: -64.0422 65.2650 79.6710  
 14 N Isotropic = -134.4400 Anisotropy = 263.8457  
 XX= -194.5563 YX= 85.1551 ZX= -75.0197  
 XY= 90.2532 YY= 7.6550 ZY= 52.0372  
 XZ= -93.9986 YZ= 43.9729 ZZ= -216.4185  
 Eigenvalues: -318.2851 -126.4919 41.4572  
 15 O Isotropic = -75.3456 Anisotropy = 276.9556  
 XX= -140.4574 YX= 85.0715 ZX= 50.1213  
 XY= 87.5990 YY= 78.2980 ZY= 2.7412  
 XZ= 54.2071 YZ= -4.0958 ZZ= -163.8773  
 Eigenvalues: -217.1523 -118.1759 109.2915  
 16 I Isotropic = 3753.1729 Anisotropy = 2048.2321  
 XX= 3880.0171 YX= -238.8657 ZX= 1114.8070  
 XY= -283.2713 YY= 3478.5863 ZY= -441.4637  
 XZ= 1042.6125 YZ= -432.1998 ZZ= 3900.9152  
 Eigenvalues: 2786.1176 3354.7400 5118.6609  
 17 C Isotropic = 63.9244 Anisotropy = 107.9054  
 XX= 49.7165 YX= -44.2608 ZX= 54.1653  
 XY= -42.1886 YY= 87.9679 ZY= -10.2270  
 XZ= 49.1615 YZ= -10.8897 ZZ= 54.0889  
 Eigenvalues: -6.7733 62.6852 135.8614  
 18 N Isotropic = 93.2843 Anisotropy = 115.8752  
 XX= 112.3714 YX= -55.4383 ZX= -8.1685  
 XY= -51.3529 YY= 83.7734 ZY= -64.6518  
 XZ= 1.4437 YZ= -55.8838 ZZ= 83.7081  
 Eigenvalues: 6.7828 102.5358 170.5344  
 19 C Isotropic = 66.5357 Anisotropy = 116.6272  
 XX= 55.2867 YX= -41.6920 ZX= 53.8394  
 XY= -39.8569 YY= 94.7589 ZY= -18.1264  
 XZ= 63.8327 YZ= -10.9639 ZZ= 49.5615  
 Eigenvalues: -9.8558 65.1757 144.2872  
 20 C Isotropic = 70.8624 Anisotropy = 139.4517  
 XX= 91.2136 YX= -31.7847 ZX= 47.8022  
 XY= -36.8653 YY= 90.6970 ZY= -55.1748  
 XZ= 44.1244 YZ= -55.2802 ZZ= 30.6764  
 Eigenvalues: -8.3309 57.0878 163.8301  
 21 C Isotropic = 69.6893 Anisotropy = 139.0434  
 XX= 59.3354 YX= -72.1478 ZX= 31.0222  
 XY= -74.1842 YY= 72.7628 ZY= -31.0956  
 XZ= 29.2135 YZ= -33.5848 ZZ= 76.9697  
 Eigenvalues: -7.4272 54.1101 162.3849  
 22 H Isotropic = 24.0198 Anisotropy = 9.9883  
 XX= 27.3814 YX= -3.7312 ZX= 2.8302  
 XY= -3.6781 YY= 19.6203 ZY= -1.1922  
 XZ= 3.0765 YZ= -1.2311 ZZ= 25.0576  
 Eigenvalues: 18.1358 23.2449 30.6787  
 23 H Isotropic = 24.1884 Anisotropy = 10.3658  
 XX= 22.9160 YX= -2.1192 ZX= 0.0137  
 XY= -2.1756 YY= 18.5700 ZY= -0.0624  
 XZ= -0.7185 YZ= 0.3458 ZZ= 31.0792  
 Eigenvalues: 17.6879 23.7783 31.0990

24 H Isotropic = 23.0109 Anisotropy = 10.2740  
 XX= 22.6487 YX= -2.4281 ZX= 2.0934  
 XY= -2.2439 YY= 17.0632 ZY= -0.7623  
 XZ= 1.3941 YZ= -0.4898 ZZ= 29.3208  
 Eigenvalues: 16.2150 22.9575 29.8603

25 H Isotropic = 24.0880 Anisotropy = 8.9261  
 XX= 27.7740 YX= -5.0350 ZX= 0.3622  
 XY= -5.4555 YY= 17.8900 ZY= -0.3764  
 XZ= -0.4732 YZ= 0.1878 ZZ= 26.5999  
 Eigenvalues: 15.6242 26.6010 30.0387

26 H Isotropic = 24.9213 Anisotropy = 12.6249  
 XX= 27.0066 YX= -4.2773 ZX= 3.7059  
 XY= -4.6814 YY= 19.8419 ZY= -4.6483  
 XZ= 3.5229 YZ= -2.0170 ZZ= 27.9153  
 Eigenvalues: 17.4478 23.9782 33.3379

27 H Isotropic = 24.1014 Anisotropy = 4.4073  
 XX= 23.7380 YX= 2.9714 ZX= -1.6803  
 XY= 3.7757 YY= 23.5904 ZY= 0.3847  
 XZ= -0.9603 YZ= 2.1954 ZZ= 24.9760  
 Eigenvalues: 19.6503 25.6144 27.0397

28 H Isotropic = 24.6955 Anisotropy = 3.9325  
 XX= 25.2421 YX= 1.2199 ZX= -2.3587  
 XY= 1.7523 YY= 23.1963 ZY= -0.3632  
 XZ= -1.1255 YZ= 1.2696 ZZ= 25.6480  
 Eigenvalues: 21.9630 24.8062 27.3171

29 H Isotropic = 25.0137 Anisotropy = 2.8316  
 XX= 25.2716 YX= 0.7437 ZX= -1.1561  
 XY= 0.7847 YY= 23.7595 ZY= 1.0020  
 XZ= -1.0020 YZ= 1.4135 ZZ= 26.0101  
 Eigenvalues: 22.7095 25.4303 26.9014

30 H Isotropic = 25.1129 Anisotropy = 5.9069  
 XX= 25.0007 YX= -1.3081 ZX= -0.8739  
 XY= -1.2009 YY= 24.6606 ZY= 4.1253  
 XZ= -1.4177 YZ= 2.1512 ZZ= 25.6775  
 Eigenvalues: 21.9723 24.3156 29.0509

## Isomer 7 (conformer 2)

1 C Isotropic = 56.8466 Anisotropy = 145.3184

XX= 48.5525 YX= 44.9071 ZX= 28.2913

XY= 45.1529 YY= 120.8258 ZY= -55.7458

XZ= 27.5739 YZ= -57.0973 ZZ= 1.1614

Eigenvalues: -42.4226 59.2368 153.7255

2 C Isotropic = 46.3927 Anisotropy = 115.2356

XX= 25.3187 YX= 13.8658 ZX= -57.2120

XY= 15.3473 YY= 111.7207 ZY= -20.6003

XZ= -52.1518 YZ= -21.1669 ZZ= 2.1386

Eigenvalues: -42.5001 58.4617 123.2164

3 C Isotropic = 70.5878 Anisotropy = 124.2147

XX= 4.4458 YX= 42.6659 ZX= -15.1557

XY= 41.4831 YY= 134.1632 ZY= -19.5630

XZ= -10.0751 YZ= -21.5555 ZZ= 73.1544

Eigenvalues: -8.5077 66.8735 153.3976

4 C Isotropic = 46.7449 Anisotropy = 138.8505

XX= 28.1568 YX= 38.2574 ZX= 12.4952

XY= 37.6407 YY= 112.6588 ZY= -49.7850

XZ= 13.5331 YZ= -46.1705 ZZ= -0.5808

Eigenvalues: -30.3575 31.2804 139.3120

5 C Isotropic = 60.4541 Anisotropy = 161.7637

XX= 20.0271 YX= 39.3225 ZX= -30.8116

XY= 41.1948 YY= 143.2810 ZY= -36.1142

XZ= -30.1379 YZ= -37.4001 ZZ= 18.0542

Eigenvalues: -11.4740 24.5397 168.2966

6 C Isotropic = 58.8987 Anisotropy = 176.0403

XX= -6.4902 YX= 65.0117 ZX= 3.3478

XY= 65.8834 YY= 140.5995 ZY= -41.8860

XZ= 0.5216 YZ= -40.3288 ZZ= 42.5869

Eigenvalues: -35.2113 35.6486 176.2589

7 N Isotropic = 112.1593 Anisotropy = 91.8098

XX= 70.7920 YX= 37.1105 ZX= 14.2196

XY= 46.8107 YY= 148.8538 ZY= -29.9548

XZ= 25.7240 YZ= -25.7188 ZZ= 116.8322

Eigenvalues: 40.7570 122.3550 173.3659

8 C Isotropic = 59.0345 Anisotropy = 119.1122

XX= 51.7856 YX= 16.8194 ZX= -36.9083

XY= 23.7202 YY= 121.6263 ZY= -29.2085

XZ= -28.2093 YZ= -32.4864 ZZ= 3.6917

Eigenvalues: -15.4520 54.1129 138.4427

9 C Isotropic = 75.9268 Anisotropy = 106.1721

XX= 52.4192 YX= 20.2646 ZX= -32.0196

XY= 22.3402 YY= 134.4917 ZY= -18.9640

XZ= -36.3279 YZ= -18.2023 ZZ= 40.8693

Eigenvalues: 11.9842 69.0879 146.7082

10 C Isotropic = 19.7413 Anisotropy = 122.0836

XX= -12.3414 YX= 14.2179 ZX= -11.2173

XY= 20.0288 YY= 94.8090 ZY= 20.7467

XZ= -34.3251 YZ= 28.4464 ZZ= -23.2437

Eigenvalues: -47.4990 5.5925 101.1303

11 Br Isotropic = 1887.2488 Anisotropy = 1572.3951

XX= 1908.1943 YX= 40.6200 ZX= 731.8805

XY= 35.9490 YY= 1343.2413 ZY= 103.5582

XZ= 720.9067 YZ= 113.8099 ZZ= 2410.3109

Eigenvalues: 1321.0223 1405.2120 2935.5122

12 C Isotropic = 71.0123 Anisotropy = 87.2863

XX= 69.1828 YX= 9.0884 ZX= -4.3402

XY= 11.3558 YY= 121.6843 ZY= 25.8731  
 XZ= 6.3118 YZ= 23.5238 ZZ= 22.1698  
 Eigenvalues: 16.3407 67.4930 129.2031  
 13 C Isotropic = 28.0509 Anisotropy = 77.4206  
 XX= -55.4907 YX= 18.8455 ZX= -43.3680  
 XY= 5.9466 YY= 78.5257 ZY= -0.3891  
 XZ= -12.4254 YZ= 5.8282 ZZ= 61.1177  
 Eigenvalues: -62.9592 67.4472 79.6646  
 14 N Isotropic = -138.7347 Anisotropy = 277.0426  
 XX= -329.4568 YX= 41.5992 ZX= -4.6710  
 XY= 16.3645 YY= 33.1810 ZY= 57.4546  
 XZ= -2.4542 YZ= 26.7241 ZZ= -119.9282  
 Eigenvalues: -331.9870 -130.1774 45.9604  
 15 O Isotropic = -77.2315 Anisotropy = 259.4455  
 XX= -110.0414 YX= 14.0983 ZX= 16.8789  
 XY= 33.4406 YY= 81.3637 ZY= 66.2991  
 XZ= 12.7982 YZ= 47.9144 ZZ= -203.0167  
 Eigenvalues: -215.0401 -112.3865 95.7322  
 16 I Isotropic = 3739.2840 Anisotropy = 2047.6371  
 XX= 5086.3709 YX= -153.7457 ZX= 138.2534  
 XY= -92.8774 YY= 3325.2075 ZY= 137.3693  
 XZ= 168.0773 YZ= 31.8913 ZZ= 2806.2735  
 Eigenvalues: 2780.1027 3333.3738 5104.3754  
 17 C Isotropic = 63.8301 Anisotropy = 109.1315  
 XX= 111.8385 YX= 31.9416 ZX= 15.9111  
 XY= 29.6494 YY= 54.5196 ZY= 44.5216  
 XZ= 19.8524 YZ= 42.2707 ZZ= 25.1323  
 Eigenvalues: -6.1022 61.0081 136.5845  
 18 N Isotropic = 88.7327 Anisotropy = 127.7013  
 XX= 112.6068 YX= 70.2798 ZX= 48.2255  
 XY= 77.8556 YY= 60.5771 ZY= -19.4378  
 XZ= 33.9795 YZ= -8.8317 ZZ= 93.0143  
 Eigenvalues: -5.1168 97.4480 173.8669  
 19 C Isotropic = 65.3595 Anisotropy = 120.0488  
 XX= 119.9296 YX= 28.4627 ZX= 23.7587  
 XY= 36.5798 YY= 63.9792 ZY= 37.2395  
 XZ= 17.9079 YZ= 45.6696 ZZ= 12.1696  
 Eigenvalues: -10.8606 61.5471 145.3920  
 20 C Isotropic = 71.4321 Anisotropy = 139.4377  
 XX= 122.1228 YX= 43.6233 ZX= 45.3450  
 XY= 49.6592 YY= 78.7510 ZY= 5.3308  
 XZ= 50.9585 YZ= 3.0209 ZZ= 13.4225  
 Eigenvalues: -7.0563 56.9620 164.3906  
 21 C Isotropic = 69.5722 Anisotropy = 141.6108  
 XX= 117.5421 YX= 63.6753 ZX= 21.8680  
 XY= 67.0744 YY= 31.0543 ZY= 33.6314  
 XZ= 22.4707 YZ= 27.4641 ZZ= 60.1203  
 Eigenvalues: -8.4698 53.2071 163.9794  
 22 H Isotropic = 24.5291 Anisotropy = 11.9817  
 XX= 30.4609 YX= -1.6834 ZX= 4.1203  
 XY= -1.3489 YY= 19.2820 ZY= 1.4992  
 XZ= 4.1876 YZ= 0.9435 ZZ= 23.8444  
 Eigenvalues: 18.3477 22.7227 32.5169  
 23 H Isotropic = 24.2282 Anisotropy = 9.6979  
 XX= 23.8571 YX= -1.4745 ZX= 1.0156  
 XY= -1.3758 YY= 19.1485 ZY= 3.2896  
 XZ= 0.5941 YZ= 3.4788 ZZ= 29.6789  
 Eigenvalues: 17.7386 24.2525 30.6935

24 H Isotropic = 25.0707 Anisotropy = 13.1149  
 XX= 30.5594 YX= 3.2447 ZX= 2.3924  
 XY= 3.7910 YY= 19.3960 ZY= 3.3082  
 XZ= 4.4834 YZ= 3.7221 ZZ= 25.2567  
 Eigenvalues: 17.4744 23.9237 33.8140

25 H Isotropic = 23.8087 Anisotropy = 9.5846  
 XX= 28.6981 YX= -4.0295 ZX= -0.3304  
 XY= -3.5715 YY= 17.5726 ZY= 2.2513  
 XZ= -0.6842 YZ= 2.8225 ZZ= 25.1553  
 Eigenvalues: 15.8368 25.3908 30.1984

26 H Isotropic = 23.9226 Anisotropy = 6.0116  
 XX= 26.6919 YX= -2.6037 ZX= -0.6574  
 XY= -3.4462 YY= 20.1721 ZY= 1.7588  
 XZ= 0.8644 YZ= 0.8594 ZZ= 24.9037  
 Eigenvalues: 18.7286 25.1089 27.9303

27 H Isotropic = 24.1974 Anisotropy = 3.5314  
 XX= 23.5878 YX= -2.6913 ZX= -2.3482  
 XY= -0.2243 YY= 25.1024 ZY= -1.7321  
 XZ= -3.1177 YZ= -0.3403 ZZ= 23.9020  
 Eigenvalues: 20.3464 25.6943 26.5517

28 H Isotropic = 25.0417 Anisotropy = 3.7047  
 XX= 24.3569 YX= -1.4676 ZX= -0.8107  
 XY= 0.4246 YY= 24.6386 ZY= -2.6010  
 XZ= -1.6294 YZ= -0.9874 ZZ= 26.1297  
 Eigenvalues: 22.6614 24.9523 27.5116

29 H Isotropic = 25.0907 Anisotropy = 2.8866  
 XX= 24.9716 YX= -1.7543 ZX= -1.0672  
 XY= -0.7518 YY= 23.8033 ZY= -1.1048  
 XZ= -0.9812 YZ= -0.3607 ZZ= 26.4974  
 Eigenvalues: 22.6440 25.6130 27.0152

30 H Isotropic = 24.9053 Anisotropy = 7.0141  
 XX= 23.6012 YX= -1.2021 ZX= 0.8911  
 XY= -2.1005 YY= 21.9181 ZY= 2.1827  
 XZ= 0.3997 YZ= 1.1884 ZZ= 29.1964  
 Eigenvalues: 20.5414 24.5931 29.5813



### Isomer 7 (conformer 3)

1 C Isotropic = 56.3828 Anisotropy = 146.1923

XX= 34.9087 YX= 42.1909 ZX= 49.6346

XY= 42.1728 YY= 138.4358 ZY= -9.6435

XZ= 47.0070 YZ= -8.8781 ZZ= -4.1962

Eigenvalues: -42.4252 57.7293 153.8443

2 C Isotropic = 46.4192 Anisotropy = 115.1424

XX= 45.7230 YX= 31.8249 ZX= -40.2427

XY= 31.4492 YY= 109.8585 ZY= 22.9649

XZ= -36.4412 YZ= 22.2508 ZZ= -16.3238

Eigenvalues: -42.3969 58.4737 123.1808

3 C Isotropic = 70.2181 Anisotropy = 125.0603

XX= 13.1003 YX= 53.6968 ZX= -12.3154

XY= 54.4155 YY= 132.5352 ZY= 9.2200

XZ= -7.9971 YZ= 8.1077 ZZ= 65.0189

Eigenvalues: -9.8532 66.9159 153.5917

4 C Isotropic = 47.1825 Anisotropy = 139.6778

XX= 24.3303 YX= 42.1320 ZX= 31.5746

XY= 43.1131 YY= 124.1897 ZY= -3.9032

XZ= 30.1911 YZ= -3.0401 ZZ= -6.9723

Eigenvalues: -30.5493 31.7958 140.3011

5 C Isotropic = 59.2415 Anisotropy = 162.3275

XX= 28.7257 YX= 53.0872 ZX= -13.1744

XY= 52.1373 YY= 146.9833 ZY= 14.3641

XZ= -12.4408 YZ= 13.9113 ZZ= 2.0154

Eigenvalues: -12.2136 22.4781 167.4598

6 C Isotropic = 58.3947 Anisotropy = 172.0364

XX= -9.8712 YX= 68.2101 ZX= 13.8808

XY= 68.2223 YY= 147.1842 ZY= 2.9475

XZ= 9.1541 YZ= 4.3095 ZZ= 37.8711

Eigenvalues: -36.5842 38.6827 173.0856

7 N Isotropic = 112.4275 Anisotropy = 88.6839

XX= 60.4300 YX= 40.4483 ZX= 20.6715

XY= 32.5990 YY= 159.1268 ZY= 0.2116

XZ= 25.9885 YZ= -6.4991 ZZ= 117.7256

Eigenvalues: 41.3589 124.3735 171.5500

8 C Isotropic = 60.5049 Anisotropy = 122.8188

XX= 50.6831 YX= 34.3910 ZX= -18.1613

XY= 8.4221 YY= 136.9709 ZY= 8.8973

XZ= -11.8429 YZ= 13.6983 ZZ= -6.1392

Eigenvalues: -11.6640 50.7947 142.3841

9 C Isotropic = 75.9003 Anisotropy = 107.9827

XX= 61.0956 YX= 32.6983 ZX= -13.2431

XY= 32.9880 YY= 135.0125 ZY= 13.5357

XZ= -21.9079 YZ= 13.9822 ZZ= 31.5927

Eigenvalues: 16.9187 62.8934 147.8888

10 C Isotropic = 16.8571 Anisotropy = 123.6186

XX= -31.8497 YX= 44.5734 ZX= -4.6837

XY= 47.0938 YY= 83.1136 ZY= 1.6342

XZ= 21.3073 YZ= -0.1339 ZZ= -0.6927

Eigenvalues: -49.0807 0.3825 99.2694

11 Br Isotropic = 1891.3953 Anisotropy = 1571.8218

XX= 1651.7463 YX= -159.4243 ZX= 561.5420

XY= -153.5201 YY= 1398.5723 ZY= -280.4527

XZ= 539.1761 YZ= -284.2705 ZZ= 2623.8674

Eigenvalues: 1322.9993 1411.9102 2939.2765

12 C Isotropic = 73.3085 Anisotropy = 78.0775

XX= 50.2005 YX= 21.6822 ZX= 27.3803

XY= 18.8269 YY= 119.9001 ZY= -10.2711  
 XZ= 18.6634 YZ= -2.8360 ZZ= 49.8251  
 Eigenvalues: 23.2144 71.3510 125.3602  
 13 C Isotropic = 28.6659 Anisotropy = 78.2875  
 XX= -3.3723 YX= 31.5740 ZX= -44.6372  
 XY= 41.5327 YY= 64.3288 ZY= 16.5110  
 XZ= -72.6196 YZ= 28.0535 ZZ= 25.0413  
 Eigenvalues: -63.6317 68.7718 80.8576  
 14 N Isotropic = -133.3394 Anisotropy = 267.3167  
 XX= -193.6144 YX= 82.4557 ZX= -73.4150  
 XY= 93.5608 YY= 10.9696 ZY= 53.4005  
 XZ= -93.0744 YZ= 44.4917 ZZ= -217.3732  
 Eigenvalues: -317.3731 -127.5167 44.8718  
 15 O Isotropic = -77.1013 Anisotropy = 273.1659  
 XX= -144.6269 YX= 80.1806 ZX= 54.1688  
 XY= 83.8706 YY= 76.0111 ZY= 10.0632  
 XZ= 54.9962 YZ= -0.1790 ZZ= -162.6880  
 Eigenvalues: -218.3837 -117.9294 105.0093  
 16 I Isotropic = 3774.4194 Anisotropy = 2031.8345  
 XX= 3872.9238 YX= -224.3543 ZX= 1086.7881  
 XY= -263.2360 YY= 3456.1593 ZY= -437.0666  
 XZ= 1029.8320 YZ= -409.3420 ZZ= 3994.1750  
 Eigenvalues: 2847.9756 3346.3068 5128.9757  
 17 C Isotropic = 63.2100 Anisotropy = 108.7600  
 XX= 86.2910 YX= -31.3063 ZX= 17.4037  
 XY= -26.5493 YY= 89.9819 ZY= -46.9170  
 XZ= 23.1086 YZ= -44.0074 ZZ= 13.3571  
 Eigenvalues: -8.2345 62.1478 135.7167  
 18 N Isotropic = 86.5384 Anisotropy = 126.2066  
 XX= 54.6041 YX= -79.0160 ZX= 18.2094  
 XY= -76.9964 YY= 104.0192 ZY= -19.0573  
 XZ= 11.3787 YZ= -23.1860 ZZ= 100.9919  
 Eigenvalues: -2.5169 91.4560 170.6761  
 19 C Isotropic = 65.0963 Anisotropy = 118.8303  
 XX= 88.4841 YX= -26.5644 ZX= 33.8752  
 XY= -35.1219 YY= 96.9698 ZY= -41.7908  
 XZ= 24.1612 YZ= -46.4611 ZZ= 9.8350  
 Eigenvalues: -11.1463 62.1187 144.3165  
 20 C Isotropic = 72.7995 Anisotropy = 136.7069  
 XX= 64.4696 YX= -50.3194 ZX= 51.3268  
 XY= -52.8999 YY= 113.4060 ZY= -21.0374  
 XZ= 56.6547 YZ= -17.4953 ZZ= 40.5229  
 Eigenvalues: -5.9386 60.3997 163.9375  
 21 C Isotropic = 71.6299 Anisotropy = 137.8428  
 XX= 77.1818 YX= -63.7573 ZX= 0.5143  
 XY= -61.5860 YY= 87.1613 ZY= -64.2353  
 XZ= 7.8832 YZ= -47.6832 ZZ= 50.5466  
 Eigenvalues: -7.5069 58.8715 163.5251  
 22 H Isotropic = 24.0509 Anisotropy = 10.0471  
 XX= 27.3004 YX= -3.5642 ZX= 2.8586  
 XY= -3.5652 YY= 19.5991 ZY= -1.5075  
 XZ= 3.1495 YZ= -1.5538 ZZ= 25.2533  
 Eigenvalues: 18.1844 23.2195 30.7490  
 23 H Isotropic = 24.1907 Anisotropy = 10.2902  
 XX= 23.1327 YX= -1.9362 ZX= -0.5343  
 XY= -1.9561 YY= 18.4951 ZY= -0.6804  
 XZ= -1.2586 YZ= -0.2561 ZZ= 30.9443  
 Eigenvalues: 17.7442 23.7771 31.0508

24 H Isotropic = 22.9788 Anisotropy = 10.3663  
 XX= 22.5632 YX= -2.3347 ZX= 1.7728  
 XY= -2.2818 YY= 16.9849 ZY= -1.3151  
 XZ= 1.1155 YZ= -1.0239 ZZ= 29.3882  
 Eigenvalues: 16.1246 22.9221 29.8896

25 H Isotropic = 24.0145 Anisotropy = 8.9800  
 XX= 28.0710 YX= -4.5376 ZX= 0.1088  
 XY= -5.2336 YY= 17.6149 ZY= -0.9436  
 XZ= -0.7962 YZ= -0.2564 ZZ= 26.3576  
 Eigenvalues: 15.6437 26.3986 30.0012

26 H Isotropic = 23.5238 Anisotropy = 12.4607  
 XX= 26.6733 YX= -3.4596 ZX= 2.8292  
 XY= -2.6609 YY= 16.7915 ZY= -4.6076  
 XZ= 4.0123 YZ= -2.7296 ZZ= 27.1065  
 Eigenvalues: 15.2704 23.4701 31.8309

27 H Isotropic = 23.7413 Anisotropy = 5.1018  
 XX= 25.2965 YX= 0.8187 ZX= -1.7100  
 XY= 1.5221 YY= 22.9204 ZY= 4.9902  
 XZ= -2.1461 YZ= 2.8892 ZZ= 23.0070  
 Eigenvalues: 18.3328 25.7485 27.1425

28 H Isotropic = 24.6317 Anisotropy = 3.9325  
 XX= 24.8933 YX= 1.3438 ZX= -0.6591  
 XY= 0.5701 YY= 22.7583 ZY= 2.1348  
 XZ= -1.7524 YZ= 1.3870 ZZ= 26.2434  
 Eigenvalues: 21.4761 25.1656 27.2533

29 H Isotropic = 25.1112 Anisotropy = 2.8519  
 XX= 25.7310 YX= 1.2175 ZX= -0.9928  
 XY= 0.9458 YY= 23.4320 ZY= 0.5488  
 XZ= -1.0571 YZ= 0.6958 ZZ= 26.1706  
 Eigenvalues: 22.7254 25.5957 27.0124

30 H Isotropic = 24.9861 Anisotropy = 5.1263  
 XX= 25.8619 YX= 0.6759 ZX= -1.9451  
 XY= 1.4021 YY= 22.6190 ZY= -2.1791  
 XZ= -1.3743 YZ= -0.7140 ZZ= 26.4775  
 Eigenvalues: 22.0673 24.4874 28.4037

### Isomer 7 (conformer 4)

1 C Isotropic = 57.4657 Anisotropy = 143.8626

XX= 59.2650 YX= 50.9657 ZX= 24.0493

XY= 51.2605 YY= 112.9751 ZY= -55.9942

XZ= 22.2244 YZ= -55.4976 ZZ= 0.1569

Eigenvalues: -40.8975 59.9205 153.3741

2 C Isotropic = 46.9537 Anisotropy = 114.0644

XX= 31.5348 YX= 23.8776 ZX= -58.3070

XY= 24.0471 YY= 108.5501 ZY= -12.6087

XZ= -52.8434 YZ= -12.0302 ZZ= 0.7762

Eigenvalues: -41.6621 59.5265 122.9966

3 C Isotropic = 70.5658 Anisotropy = 124.5152

XX= 14.9090 YX= 55.2574 ZX= -16.3714

XY= 55.1323 YY= 124.9903 ZY= -16.4112

XZ= -11.6512 YZ= -18.5506 ZZ= 71.7981

Eigenvalues: -8.5022 66.6237 153.5760

4 C Isotropic = 46.5942 Anisotropy = 139.1142

XX= 36.7600 YX= 46.1296 ZX= 9.0632

XY= 45.6737 YY= 106.6089 ZY= -47.5261

XZ= 10.0246 YZ= -44.2284 ZZ= -3.5863

Eigenvalues: -30.7631 31.2087 139.3370

5 C Isotropic = 60.3818 Anisotropy = 163.8129

XX= 28.1753 YX= 53.0823 ZX= -32.0793

XY= 52.4516 YY= 138.4051 ZY= -26.5375

XZ= -32.4987 YZ= -31.7660 ZZ= 14.5651

Eigenvalues: -12.7671 24.3222 169.5904

6 C Isotropic = 59.2020 Anisotropy = 175.3782

XX= 8.0547 YX= 80.2854 ZX= 1.8537

XY= 79.0979 YY= 128.2900 ZY= -35.4022

XZ= -1.9769 YZ= -38.1451 ZZ= 41.2613

Eigenvalues: -35.3975 36.8828 176.1208

7 N Isotropic = 112.6326 Anisotropy = 91.1548

XX= 79.8720 YX= 43.7091 ZX= 11.8748

XY= 51.8458 YY= 141.8928 ZY= -30.2082

XZ= 24.6171 YZ= -27.4991 ZZ= 116.1329

Eigenvalues: 41.6369 122.8584 173.4024

8 C Isotropic = 59.0576 Anisotropy = 119.3283

XX= 57.1516 YX= 24.5904 ZX= -39.3266

XY= 32.3951 YY= 117.8367 ZY= -21.6093

XZ= -30.0852 YZ= -26.6244 ZZ= 2.1845

Eigenvalues: -15.3324 53.8954 138.6098

9 C Isotropic = 75.6676 Anisotropy = 107.1401

XX= 56.8777 YX= 29.3282 ZX= -32.6087

XY= 30.9066 YY= 130.8943 ZY= -12.8727

XZ= -37.2519 YZ= -11.9630 ZZ= 39.2308

Eigenvalues: 11.3116 68.5969 147.0943

10 C Isotropic = 17.2802 Anisotropy = 125.6003

XX= -10.1924 YX= 23.9244 ZX= -8.8122

XY= 34.0899 YY= 86.3378 ZY= 30.4477

XZ= -30.6777 YZ= 38.7106 ZZ= -24.3047

Eigenvalues: -52.7825 3.6094 101.0138

11 Br Isotropic = 1891.6251 Anisotropy = 1576.2469

XX= 1895.8793 YX= -44.1000 ZX= 732.2491

XY= -36.1058 YY= 1339.8716 ZY= 2.6965

XZ= 718.8816 YZ= 7.9310 ZZ= 2439.1245

Eigenvalues: 1321.4929 1410.9261 2942.4564

12 C Isotropic = 70.5732 Anisotropy = 84.5526

XX= 73.0642 YX= 12.0833 ZX= 0.6633

XY= 13.7075 YY= 114.6291 ZY= 31.2768  
 XZ= 9.9833 YZ= 27.6450 ZZ= 24.0263  
 Eigenvalues: 15.2523 69.5258 126.9416  
 13 C Isotropic = 28.6550 Anisotropy = 78.9564  
 XX= -54.8986 YX= 33.7878 ZX= -38.5433  
 XY= 18.0921 YY= 76.2404 ZY= 5.7360  
 XZ= -9.6816 YZ= 5.8012 ZZ= 64.6233  
 Eigenvalues: -64.5904 69.2629 81.2926  
 14 N Isotropic = -138.6832 Anisotropy = 276.0358  
 XX= -319.7017 YX= 71.6757 ZX= 4.9320  
 XY= 46.2188 YY= 18.4577 ZY= 69.3747  
 XZ= 5.7959 YZ= 34.3335 ZZ= -114.8057  
 Eigenvalues: -329.7374 -131.6529 45.3406  
 15 O Isotropic = -81.2277 Anisotropy = 262.6149  
 XX= -109.5859 YX= 29.9593 ZX= 22.1418  
 XY= 51.9626 YY= 64.8354 ZY= 84.5224  
 XZ= 16.7707 YZ= 63.0942 ZZ= -198.9326  
 Eigenvalues: -218.8827 -118.6493 93.8489  
 16 I Isotropic = 3788.8691 Anisotropy = 2036.4075  
 XX= 5090.7575 YX= -329.8923 ZX= 10.2039  
 XY= -296.7833 YY= 3382.4244 ZY= 141.5020  
 XZ= 50.9723 YZ= 71.8798 ZZ= 2893.4254  
 Eigenvalues: 2866.8678 3353.2654 5146.4741  
 17 C Isotropic = 64.3449 Anisotropy = 110.0356  
 XX= 112.1795 YX= 23.1411 ZX= 49.5870  
 XY= 25.7278 YY= 62.0938 ZY= -14.6770  
 XZ= 48.3758 YZ= -6.9400 ZZ= 18.7613  
 Eigenvalues: -7.8674 63.2001 137.7019  
 18 N Isotropic = 88.3100 Anisotropy = 126.3170  
 XX= 155.3600 YX= 34.2558 ZX= 18.4652  
 XY= 36.9720 YY= 6.8059 ZY= 30.8893  
 XZ= 20.4249 YZ= 20.7898 ZZ= 102.7641  
 Eigenvalues: -5.4605 97.8691 172.5213  
 19 C Isotropic = 65.3764 Anisotropy = 119.2236  
 XX= 123.7348 YX= 17.3244 ZX= 44.5191  
 XY= 22.6338 YY= 63.6665 ZY= -0.8787  
 XZ= 52.4914 YZ= -12.3367 ZZ= 8.7280  
 Eigenvalues: -11.3286 62.5990 144.8589  
 20 C Isotropic = 71.8168 Anisotropy = 139.9848  
 XX= 146.2079 YX= 17.0255 ZX= 39.9950  
 XY= 22.1174 YY= 45.2787 ZY= 35.7475  
 XZ= 38.1017 YZ= 38.9690 ZZ= 23.9639  
 Eigenvalues: -7.0262 57.3367 165.1400  
 21 C Isotropic = 68.6206 Anisotropy = 142.3038  
 XX= 134.3181 YX= 44.6331 ZX= 46.0618  
 XY= 49.1827 YY= 16.4257 ZY= -18.1990  
 XZ= 41.1139 YZ= -10.6625 ZZ= 55.1180  
 Eigenvalues: -13.0158 55.3878 163.4898  
 22 H Isotropic = 24.5684 Anisotropy = 12.0827  
 XX= 30.0062 YX= -2.8671 ZX= 4.2610  
 XY= -2.7573 YY= 19.6401 ZY= 0.8431  
 XZ= 4.2773 YZ= 0.3444 ZZ= 24.0588  
 Eigenvalues: 18.3312 22.7505 32.6235  
 23 H Isotropic = 24.2269 Anisotropy = 9.6850  
 XX= 23.5383 YX= -1.9996 ZX= 1.1976  
 XY= -1.9093 YY= 19.2761 ZY= 2.8452  
 XZ= 0.8342 YZ= 3.1206 ZZ= 29.8661  
 Eigenvalues: 17.7007 24.2963 30.6835

24 H Isotropic = 25.3162 Anisotropy = 12.7066  
 XX= 31.2505 YX= 2.1393 ZX= 2.8549  
 XY= 1.3042 YY= 18.6794 ZY= 2.2352  
 XZ= 4.8768 YZ= 2.7477 ZZ= 26.0187  
 Eigenvalues: 17.8907 24.2706 33.7872  
 25 H Isotropic = 23.8468 Anisotropy = 9.6831  
 XX= 27.8759 YX= -5.0851 ZX= -0.2537  
 XY= -4.7759 YY= 18.3949 ZY= 2.0821  
 XZ= -0.4423 YZ= 2.6379 ZZ= 25.2696  
 Eigenvalues: 15.8508 25.3874 30.3022  
 26 H Isotropic = 23.9436 Anisotropy = 5.9755  
 XX= 26.0342 YX= -3.1220 ZX= -0.5793  
 XY= -4.0158 YY= 20.8311 ZY= 1.7863  
 XZ= 0.7775 YZ= 0.6734 ZZ= 24.9655  
 Eigenvalues: 18.8040 25.0995 27.9273  
 27 H Isotropic = 23.6561 Anisotropy = 4.9593  
 XX= 19.4764 YX= -2.2624 ZX= 1.3441  
 XY= -3.5171 YY= 24.6589 ZY= 0.9621  
 XZ= 0.5775 YZ= -0.0528 ZZ= 26.8331  
 Eigenvalues: 18.0575 25.9485 26.9623  
 28 H Isotropic = 24.5619 Anisotropy = 3.8570  
 XX= 23.4296 YX= -1.7236 ZX= -1.9442  
 XY= -1.1862 YY= 23.7913 ZY= 0.2856  
 XZ= -1.1076 YZ= -0.8215 ZZ= 26.4650  
 Eigenvalues: 21.7574 24.7951 27.1333  
 29 H Isotropic = 25.2985 Anisotropy = 2.8724  
 XX= 24.4763 YX= -0.7159 ZX= -1.1879  
 XY= 0.4406 YY= 25.2919 ZY= -1.1781  
 XZ= -1.2171 YZ= -1.0099 ZZ= 26.1272  
 Eigenvalues: 23.5710 25.1110 27.2134  
 30 H Isotropic = 25.5429 Anisotropy = 4.6436  
 XX= 25.2856 YX= 0.4153 ZX= -0.8131  
 XY= 2.4975 YY= 26.0282 ZY= -2.6578  
 XZ= -1.2755 YZ= -1.3053 ZZ= 25.3148  
 Eigenvalues: 23.6375 24.3526 28.6386

## Isomer 8 (conformer 1)

1 C Isotropic = 58.3545 Anisotropy = 144.7060

XX= 44.8443 YX= -30.7937 ZX= 34.5001

XY= -27.9153 YY= 2.6514 ZY= 57.9819

XZ= 33.8013 YZ= 58.3029 ZZ= 127.5678

Eigenvalues: -39.5445 59.7828 154.8251

2 C Isotropic = 46.9367 Anisotropy = 113.6135

XX= 18.5673 YX= 55.6490 ZX= 3.8535

XY= 52.0646 YY= 9.9616 ZY= 26.9342

XZ= 5.3390 YZ= 27.1365 ZZ= 112.2811

Eigenvalues: -41.6380 59.7690 122.6790

3 C Isotropic = 70.4409 Anisotropy = 124.6606

XX= -1.7580 YX= 10.3129 ZX= 29.8499

XY= 4.8780 YY= 75.2145 ZY= 25.7741

XZ= 32.8315 YZ= 25.1793 ZZ= 137.8662

Eigenvalues: -8.5254 66.3002 153.5480

4 C Isotropic = 47.0199 Anisotropy = 143.2893

XX= 22.8382 YX= -12.2585 ZX= 29.5287

XY= -13.2098 YY= 1.7453 ZY= 52.6703

XZ= 29.5553 YZ= 55.9616 ZZ= 116.4763

Eigenvalues: -30.2480 28.7616 142.5461

5 C Isotropic = 57.3192 Anisotropy = 168.9483

XX= 2.1730 YX= 22.8589 ZX= 26.7543

XY= 19.5768 YY= 22.9167 ZY= 48.2816

XZ= 29.1114 YZ= 47.8199 ZZ= 146.8680

Eigenvalues: -11.1054 13.1117 169.9514

6 C Isotropic = 60.3631 Anisotropy = 173.6876

XX= -21.0810 YX= -10.1793 ZX= 46.4156

XY= -9.5616 YY= 50.6508 ZY= 44.4933

XZ= 46.7948 YZ= 42.7062 ZZ= 151.5194

Eigenvalues: -37.9443 42.8787 176.1548

7 N Isotropic = 116.5739 Anisotropy = 86.1081

XX= 73.3101 YX= -20.6578 ZX= 28.1529

XY= -28.1447 YY= 120.9078 ZY= 26.0362

XZ= 34.8737 YZ= 29.5424 ZZ= 155.5038

Eigenvalues: 47.9681 127.7742 173.9793

8 C Isotropic = 59.6617 Anisotropy = 115.3732

XX= 44.6727 YX= 41.3075 ZX= 2.9991

XY= 33.6209 YY= 12.1554 ZY= 38.5929

XZ= 7.6905 YZ= 35.5360 ZZ= 122.1571

Eigenvalues: -18.3246 60.7325 136.5772

9 C Isotropic = 75.0532 Anisotropy = 112.7974

XX= 31.4469 YX= 33.3782 ZX= 12.3197

XY= 40.3041 YY= 55.2062 ZY= 26.2501

XZ= 8.6684 YZ= 27.3949 ZZ= 138.5066

Eigenvalues: 4.1880 70.7202 150.2515

10 C Isotropic = 65.9641 Anisotropy = 94.6635

XX= -8.5929 YX= -4.0225 ZX= -16.4753

XY= -3.4268 YY= 98.9395 ZY= -27.0885

XZ= -15.8736 YZ= -22.3441 ZZ= 107.5457

Eigenvalues: -11.2730 80.0922 129.0731

11 Br Isotropic = 1882.1482 Anisotropy = 1560.9063

XX= 1979.8534 YX= -743.2101 ZX= 106.5723

XY= -714.5272 YY= 2308.5038 ZY= -182.4857

XZ= 125.1311 YZ= -199.8469 ZZ= 1358.0873

Eigenvalues: 1316.5098 1407.1823 2922.7524

12 C Isotropic = 26.4583 Anisotropy = 145.2502

XX= 13.1655 YX= -5.5354 ZX= -15.8675

XY= -27.1080 YY= 28.3586 ZY= -89.7544  
 XZ= -32.8748 YZ= -89.5804 ZZ= 37.8509  
 Eigenvalues: -66.9373 23.0206 123.2918  
 13 N Isotropic = -143.6943 Anisotropy = 254.0640  
 XX= -150.7621 YX= 30.1290 ZX= 8.7727  
 XY= 22.4540 YY= -157.3461 ZY= -165.4898  
 XZ= 5.2277 YZ= -162.6401 ZZ= -122.9747  
 Eigenvalues: -308.8447 -147.9199 25.6817  
 14 O Isotropic = -61.1820 Anisotropy = 245.6330  
 XX= -136.9377 YX= 34.5724 ZX= 5.9088  
 XY= 50.2905 YY= -28.3598 ZY= -117.1336  
 XZ= -0.3051 YZ= -128.0501 ZZ= -18.2486  
 Eigenvalues: -175.5395 -110.5799 102.5733  
 15 C Isotropic = 28.7583 Anisotropy = 69.3908  
 XX= 17.9661 YX= -43.3841 ZX= -50.5576  
 XY= -41.4758 YY= 43.2028 ZY= -22.3964  
 XZ= -28.3549 YZ= -31.4306 ZZ= 25.1060  
 Eigenvalues: -45.8077 57.0637 75.0188  
 16 I Isotropic = 3656.5430 Anisotropy = 2183.7342  
 XX= 3173.2574 YX= 682.7819 ZX= 744.1636  
 XY= 803.1955 YY= 3791.8017 ZY= 597.3077  
 XZ= 721.9072 YZ= 696.2093 ZZ= 4004.5700  
 Eigenvalues: 2605.2187 3252.0446 5112.3658  
 17 C Isotropic = 61.8802 Anisotropy = 105.1266  
 XX= 34.0106 YX= -24.3180 ZX= -15.6316  
 XY= -17.1455 YY= 73.6638 ZY= -55.2313  
 XZ= -7.5024 YZ= -56.2028 ZZ= 77.9662  
 Eigenvalues: 2.9365 50.7395 131.9646  
 18 N Isotropic = 98.5349 Anisotropy = 127.5491  
 XX= 24.4929 YX= 20.3519 ZX= 32.7632  
 XY= 15.4223 YY= 132.9585 ZY= -50.7811  
 XZ= 28.7789 YZ= -43.7237 ZZ= 138.1533  
 Eigenvalues: 9.1669 102.8702 183.5676  
 19 C Isotropic = 63.7038 Anisotropy = 118.8181  
 XX= 47.2375 YX= -21.8270 ZX= -13.7845  
 XY= -29.7193 YY= 69.3216 ZY= -70.0457  
 XZ= -17.2122 YZ= -70.8063 ZZ= 74.5522  
 Eigenvalues: -12.8963 61.0918 142.9158  
 20 C Isotropic = 72.5834 Anisotropy = 134.1783  
 XX= 55.7008 YX= 8.8883 ZX= 17.3423  
 XY= 10.9525 YY= 80.8805 ZY= -80.4218  
 XZ= 20.9996 YZ= -80.7701 ZZ= 81.1688  
 Eigenvalues: -6.4087 62.1233 162.0356  
 21 C Isotropic = 68.3261 Anisotropy = 147.5340  
 XX= -6.9002 YX= -11.4642 ZX= 3.1500  
 XY= -8.9557 YY= 100.2049 ZY= -62.9497  
 XZ= 6.1672 YZ= -56.7610 ZZ= 111.6737  
 Eigenvalues: -7.8762 46.1724 166.6822  
 22 H Isotropic = 24.3929 Anisotropy = 9.7619  
 XX= 29.3705 YX= -2.7380 ZX= -1.2465  
 XY= -3.6436 YY= 24.2355 ZY= -1.5148  
 XZ= -0.6177 YZ= -1.6450 ZZ= 19.5726  
 Eigenvalues: 18.7307 23.5471 30.9008  
 23 H Isotropic = 24.1191 Anisotropy = 9.8600  
 XX= 23.7925 YX= -1.3292 ZX= -0.8614  
 XY= -1.0032 YY= 29.4412 ZY= -3.6570  
 XZ= -0.7076 YZ= -3.5656 ZZ= 19.1238  
 Eigenvalues: 17.7824 23.8825 30.6925



24 H Isotropic = 24.2555 Anisotropy = 9.5483  
 XX= 23.5945 YX= -2.0995 ZX= 0.4044  
 XY= -3.2776 YY= 28.1395 ZY= -3.5726  
 XZ= 1.7212 YZ= -3.0158 ZZ= 21.0324  
 Eigenvalues: 19.7404 22.4050 30.6210

25 H Isotropic = 23.8120 Anisotropy = 9.6165  
 XX= 29.0528 YX= 0.1492 ZX= -3.2006  
 XY= 0.8675 YY= 24.6385 ZY= -2.8015  
 XZ= -3.4106 YZ= -2.5349 ZZ= 17.7447  
 Eigenvalues: 16.1389 25.0741 30.2230

26 H Isotropic = 24.5032 Anisotropy = 6.3643  
 XX= 26.4861 YX= 0.7842 ZX= -3.3027  
 XY= -0.4361 YY= 24.3820 ZY= -0.2258  
 XZ= -3.9118 YZ= -1.6753 ZZ= 22.6415  
 Eigenvalues: 20.3444 24.4192 28.7461

27 H Isotropic = 22.9282 Anisotropy = 7.7548  
 XX= 27.5928 YX= -0.6251 ZX= -0.9816  
 XY= -0.4105 YY= 20.9799 ZY= 5.3239  
 XZ= -1.0413 YZ= 5.0310 ZZ= 20.2120  
 Eigenvalues: 15.3918 25.2948 28.0981

28 H Isotropic = 24.7887 Anisotropy = 3.7975  
 XX= 26.4176 YX= 0.9507 ZX= 0.8450  
 XY= 0.0616 YY= 23.9542 ZY= 2.5057  
 XZ= 0.5758 YZ= 2.5384 ZZ= 23.9941  
 Eigenvalues: 21.4479 25.5977 27.3203

29 H Isotropic = 25.5727 Anisotropy = 4.2539  
 XX= 26.6850 YX= 0.7006 ZX= 0.8671  
 XY= 0.4432 YY= 24.4453 ZY= 2.2630  
 XZ= 1.4633 YZ= 2.5034 ZZ= 25.5878  
 Eigenvalues: 22.5463 25.7632 28.4086

30 H Isotropic = 25.7902 Anisotropy = 11.8114  
 XX= 25.3592 YX= 0.1934 ZX= 2.4324  
 XY= 2.2112 YY= 23.5711 ZY= 4.8535  
 XZ= 6.6831 YZ= 4.2211 ZZ= 28.4403  
 Eigenvalues: 20.3138 23.3924 33.6645

## Isomer 8 (conformer 2)

1 C Isotropic = 57.4839 Anisotropy = 146.4771

XX= 37.3972 YX= -37.7207 ZX= 29.3178

XY= -35.0075 YY= -3.7623 ZY= 45.5450

XZ= 29.1357 YZ= 45.6754 ZZ= 138.8169

Eigenvalues: -41.2398 58.5563 155.1353

2 C Isotropic = 46.6726 Anisotropy = 114.8907

XX= 20.7129 YX= 53.5552 ZX= 3.5015

XY= 49.3529 YY= 2.6695 ZY= 22.2800

XZ= 4.9950 YZ= 22.9271 ZZ= 116.6353

Eigenvalues: -41.9136 58.6649 123.2664

3 C Isotropic = 70.4502 Anisotropy = 124.6508

XX= -4.2816 YX= 10.2398 ZX= 23.4892

XY= 4.0404 YY= 71.3108 ZY= 20.3600

XZ= 25.4888 YZ= 19.6044 ZZ= 144.3213

Eigenvalues: -8.4091 66.2089 153.5507

4 C Isotropic = 47.0653 Anisotropy = 142.6167

XX= 19.6209 YX= -17.2762 ZX= 24.1512

XY= -18.4977 YY= -4.5926 ZY= 41.7490

XZ= 24.9693 YZ= 45.2446 ZZ= 126.1676

Eigenvalues: -30.0494 29.1021 142.1431

5 C Isotropic = 57.6651 Anisotropy = 167.3280

XX= 2.6330 YX= 19.6292 ZX= 22.3466

XY= 17.3698 YY= 15.7664 ZY= 37.3610

XZ= 26.3759 YZ= 39.0634 ZZ= 154.5958

Eigenvalues: -10.4714 14.2495 169.2171

6 C Isotropic = 60.4354 Anisotropy = 174.7599

XX= -26.1214 YX= -13.3296 ZX= 37.0725

XY= -12.8097 YY= 44.7219 ZY= 34.4437

XZ= 37.1485 YZ= 32.9217 ZZ= 162.7057

Eigenvalues: -37.8341 42.1983 176.9420

7 N Isotropic = 116.0683 Anisotropy = 86.9426

XX= 67.5557 YX= -21.0720 ZX= 22.3477

XY= -29.7176 YY= 118.6623 ZY= 20.8039

XZ= 29.2405 YZ= 25.3075 ZZ= 161.9867

Eigenvalues: 47.6352 126.5395 174.0300

8 C Isotropic = 59.1774 Anisotropy = 116.6617

XX= 46.1992 YX= 36.3565 ZX= 3.2710

XY= 30.4776 YY= 4.0454 ZY= 32.2974

XZ= 6.8773 YZ= 31.2354 ZZ= 127.2877

Eigenvalues: -18.9321 59.5126 136.9519

9 C Isotropic = 76.3413 Anisotropy = 111.6183

XX= 35.7856 YX= 31.4679 ZX= 10.0307

XY= 38.0188 YY= 50.0356 ZY= 21.3920

XZ= 7.9326 YZ= 22.8951 ZZ= 143.2028

Eigenvalues: 7.0598 71.2107 150.7535

10 C Isotropic = 66.9939 Anisotropy = 95.1390

XX= -6.4749 YX= -2.8281 ZX= -18.2109

XY= 1.4814 YY= 96.9005 ZY= -27.2653

XZ= -22.7389 YZ= -20.3963 ZZ= 110.5560

Eigenvalues: -10.1648 80.7265 130.4199

11 Br Isotropic = 1875.8882 Anisotropy = 1568.8313

XX= 1914.6231 YX= -728.7107 ZX= 85.8957

XY= -710.2031 YY= 2378.2929 ZY= -155.1391

XZ= 86.5284 YZ= -153.7270 ZZ= 1334.7488

Eigenvalues: 1309.8037 1396.0853 2921.7757

12 C Isotropic = 26.2497 Anisotropy = 143.7296

XX= 14.7852 YX= -5.1741 ZX= -15.9847

XY= -26.4807 YY= 19.3518 ZY= -88.1795  
 XZ= -33.0829 YZ= -88.9084 ZZ= 44.6123  
 Eigenvalues: -67.0967 23.7764 122.0695  
 13 N Isotropic = -158.4902 Anisotropy = 270.9976  
 XX= -158.7665 YX= 34.6675 ZX= 3.0972  
 XY= 22.4229 YY= -197.8496 ZY= -182.5497  
 XZ= 5.9572 YZ= -167.4208 ZZ= -118.8544  
 Eigenvalues: -341.2098 -156.4356 22.1749  
 14 O Isotropic = -71.6808 Anisotropy = 258.6864  
 XX= -152.4385 YX= 41.7468 ZX= -0.6805  
 XY= 68.6983 YY= -46.3980 ZY= -117.3826  
 XZ= -15.7432 YZ= -130.2093 ZZ= -16.2059  
 Eigenvalues: -193.3419 -122.4773 100.7767  
 15 C Isotropic = 30.2965 Anisotropy = 70.4916  
 XX= 23.6996 YX= -43.7567 ZX= -48.3618  
 XY= -42.5811 YY= 42.5082 ZY= -24.1519  
 XZ= -24.2362 YZ= -35.3434 ZZ= 24.6818  
 Eigenvalues: -43.4185 57.0171 77.2909  
 16 I Isotropic = 3667.1856 Anisotropy = 2196.2032  
 XX= 3111.6506 YX= 679.9246 ZX= 709.3107  
 XY= 782.1882 YY= 3814.6330 ZY= 584.7195  
 XZ= 705.4767 YZ= 747.4807 ZZ= 4075.2732  
 Eigenvalues: 2589.8400 3280.3958 5131.3211  
 17 C Isotropic = 62.7760 Anisotropy = 104.0026  
 XX= 54.6360 YX= 4.4034 ZX= 40.4092  
 XY= 2.9669 YY= 66.8207 ZY= -55.5184  
 XZ= 39.2399 YZ= -56.2538 ZZ= 66.8713  
 Eigenvalues: -6.0531 62.2701 132.1110  
 18 N Isotropic = 92.4350 Anisotropy = 140.2552  
 XX= 24.0026 YX= -50.6523 ZX= 30.0760  
 XY= -38.3189 YY= 110.9068 ZY= -42.7373  
 XZ= 34.4832 YZ= -36.0845 ZZ= 142.3957  
 Eigenvalues: 3.5274 87.8392 185.9385  
 19 C Isotropic = 64.0730 Anisotropy = 119.3954  
 XX= 64.8243 YX= -5.9922 ZX= 31.3252  
 XY= 1.9725 YY= 60.8594 ZY= -70.3132  
 XZ= 40.8782 YZ= -69.4880 ZZ= 66.5351  
 Eigenvalues: -13.8068 62.3558 143.6699  
 20 C Isotropic = 71.9480 Anisotropy = 137.8882  
 XX= 58.9118 YX= -42.1229 ZX= 12.6176  
 XY= -46.4872 YY= 57.1240 ZY= -68.7911  
 XZ= 15.5144 YZ= -67.3187 ZZ= 99.8081  
 Eigenvalues: -6.2247 58.1952 163.8734  
 21 C Isotropic = 70.9576 Anisotropy = 140.1044  
 XX= 21.9145 YX= -16.8833 ZX= 53.3342  
 XY= -23.1968 YY= 88.0953 ZY= -53.0619  
 XZ= 53.5355 YZ= -42.2579 ZZ= 102.8628  
 Eigenvalues: -4.7906 53.3028 164.3605  
 22 H Isotropic = 24.4619 Anisotropy = 10.0788  
 XX= 29.5193 YX= -2.8880 ZX= -0.6062  
 XY= -3.7090 YY= 24.5706 ZY= -1.4270  
 XZ= -0.0744 YZ= -1.6531 ZZ= 19.2958  
 Eigenvalues: 18.7262 23.4784 31.1811  
 23 H Isotropic = 24.1370 Anisotropy = 9.8457  
 XX= 24.0266 YX= -0.8512 ZX= -0.7861  
 XY= -0.6192 YY= 29.9753 ZY= -2.9204  
 XZ= -0.6137 YZ= -2.8460 ZZ= 18.4091  
 Eigenvalues: 17.6171 24.0930 30.7008

24 H Isotropic = 24.4851 Anisotropy = 9.2524  
 XX= 23.8829 YX= -1.6263 ZX= 1.4072  
 XY= -2.9706 YY= 28.1075 ZY= -3.7418  
 XZ= 2.2670 YZ= -2.8449 ZZ= 21.4650  
 Eigenvalues: 19.8939 22.9081 30.6534  
 25 H Isotropic = 23.7165 Anisotropy = 9.6157  
 XX= 29.3789 YX= 0.4608 ZX= -2.6236  
 XY= 0.9867 YY= 25.0484 ZY= -2.1409  
 XZ= -2.5477 YZ= -1.7014 ZZ= 16.7222  
 Eigenvalues: 15.8790 25.1435 30.1269  
 26 H Isotropic = 24.3019 Anisotropy = 6.7533  
 XX= 26.8140 YX= 0.7273 ZX= -3.3499  
 XY= -0.6633 YY= 24.2935 ZY= 0.3227  
 XZ= -4.1051 YZ= -0.8653 ZZ= 21.7981  
 Eigenvalues: 19.8021 24.2994 28.8041  
 27 H Isotropic = 24.1967 Anisotropy = 11.9924  
 XX= 26.4563 YX= 3.0376 ZX= 0.7812  
 XY= 4.9188 YY= 21.0465 ZY= 5.3385  
 XZ= 5.0069 YZ= 4.4061 ZZ= 25.0874  
 Eigenvalues: 17.3863 23.0121 32.1917  
 28 H Isotropic = 25.2402 Anisotropy = 4.8313  
 XX= 25.6881 YX= 0.5091 ZX= -0.4603  
 XY= 1.5254 YY= 24.3136 ZY= 2.6053  
 XZ= 1.6194 YZ= 3.2601 ZZ= 25.7187  
 Eigenvalues: 21.9460 25.3135 28.4610  
 29 H Isotropic = 25.2750 Anisotropy = 3.0175  
 XX= 26.3828 YX= 0.7298 ZX= -0.4920  
 XY= 1.0180 YY= 24.7549 ZY= 1.6801  
 XZ= 0.7318 YZ= 2.2632 ZZ= 24.6873  
 Eigenvalues: 22.6717 25.8666 27.2866  
 30 H Isotropic = 24.4481 Anisotropy = 4.2148  
 XX= 25.4307 YX= 1.0716 ZX= 0.1553  
 XY= 1.5001 YY= 25.2301 ZY= 2.9317  
 XZ= -0.4792 YZ= 1.8221 ZZ= 22.6836  
 Eigenvalues: 21.1059 24.9805 27.2580

### Isomer 8 (conformer 3)

1 C Isotropic = 58.2638 Anisotropy = 144.5375

XX= 32.1351 YX= -28.2072 ZX= -37.6129

XY= -25.7007 YY= 65.5698 ZY= -82.4282

XZ= -35.7043 YZ= -82.4723 ZZ= 77.0865

Eigenvalues: -39.4119 59.5812 154.6221

2 C Isotropic = 47.2164 Anisotropy = 113.1146

XX= 24.9925 YX= 42.5850 ZX= 28.3088

XY= 39.3949 YY= 48.4097 ZY= -62.7325

XZ= 25.5666 YZ= -63.3527 ZZ= 68.2469

Eigenvalues: -41.3217 60.3447 122.6261

3 C Isotropic = 70.1438 Anisotropy = 125.2786

XX= -7.5682 YX= 13.1224 ZX= -3.8531

XY= 9.1738 YY= 104.7345 ZY= -43.4832

XZ= -8.9990 YZ= -43.5629 ZZ= 113.2649

Eigenvalues: -8.7076 65.4760 153.6628

4 C Isotropic = 46.7912 Anisotropy = 143.6390

XX= 13.7285 YX= -13.3051 ZX= -24.3543

XY= -13.4147 YY= 60.3658 ZY= -77.0807

XZ= -24.8930 YZ= -80.1103 ZZ= 66.2794

Eigenvalues: -31.3088 29.1320 142.5506

5 C Isotropic = 57.4208 Anisotropy = 169.2909

XX= -1.3658 YX= 17.8241 ZX= 1.0230

XY= 15.6405 YY= 79.4243 ZY= -82.6409

XZ= -2.8601 YZ= -81.9545 ZZ= 94.2039

Eigenvalues: -11.1377 13.1187 170.2814

6 C Isotropic = 60.1775 Anisotropy = 174.0531

XX= -33.0245 YX= -2.8277 ZX= -23.6904

XY= -2.7718 YY= 99.1527 ZY= -68.9549

XZ= -22.8001 YZ= -66.7487 ZZ= 114.4044

Eigenvalues: -38.1764 42.4960 176.2129

7 N Isotropic = 116.6669 Anisotropy = 86.3303

XX= 63.0030 YX= -13.7513 ZX= -22.8890

XY= -16.8138 YY= 147.0768 ZY= -27.7857

XZ= -32.2115 YZ= -32.2479 ZZ= 139.9209

Eigenvalues: 48.1165 127.6637 174.2204

8 C Isotropic = 59.2065 Anisotropy = 115.8315

XX= 48.0078 YX= 27.2962 ZX= 18.7391

XY= 22.7159 YY= 58.7753 ZY= -71.1031

XZ= 12.6158 YZ= -70.9295 ZZ= 70.8365

Eigenvalues: -19.0589 60.2510 136.4275

9 C Isotropic = 75.4965 Anisotropy = 112.5762

XX= 33.5611 YX= 25.6303 ZX= 14.1664

XY= 30.1162 YY= 90.4994 ZY= -53.5568

XZ= 18.0197 YZ= -53.1394 ZZ= 102.4291

Eigenvalues: 6.1597 69.7826 150.5473

10 C Isotropic = 66.1991 Anisotropy = 94.8158

XX= -0.4693 YX= -10.8936 ZX= 32.9656

XY= -9.2009 YY= 81.3659 ZY= 16.9987

XZ= 33.4391 YZ= 12.8162 ZZ= 117.7006

Eigenvalues: -11.1495 80.3372 129.4096

11 Br Isotropic = 1894.8170 Anisotropy = 1574.6538

XX= 1870.3871 YX= -550.2447 ZX= -440.2728

XY= -534.4053 YY= 2018.3597 ZY= 574.3783

XZ= -434.1842 YZ= 575.9334 ZZ= 1795.7041

Eigenvalues: 1320.7454 1419.1194 2944.5862

12 C Isotropic = 26.8155 Anisotropy = 144.4269

XX= 21.5136 YX= -2.0868 ZX= 23.8697

XY= -28.4151 YY= -38.8528 ZY= 59.5053  
 XZ= 31.1455 YZ= 55.5718 ZZ= 97.7858  
 Eigenvalues: -66.4434 23.7899 123.1001  
 13 N Isotropic = -143.6091 Anisotropy = 255.4124  
 XX= -147.0831 YX= 47.8568 ZX= 26.0261  
 XY= 39.0890 YY= -276.3614 ZY= 90.0335  
 XZ= 25.5262 YZ= 85.0059 ZZ= -7.3830  
 Eigenvalues: -309.7727 -147.7205 26.6658  
 14 O Isotropic = -61.7232 Anisotropy = 245.7515  
 XX= -129.2113 YX= 47.5815 ZX= 39.8337  
 XY= 56.6340 YY= -118.8573 ZY= 61.9283  
 XZ= 53.5612 YZ= 74.9194 ZZ= 62.8990  
 Eigenvalues: -177.1254 -110.1554 102.1111  
 15 C Isotropic = 29.0420 Anisotropy = 69.1230  
 XX= 26.1414 YX= -54.5768 ZX= 30.8945  
 XY= -45.6065 YY= 17.6316 ZY= 28.1343  
 XZ= 10.9539 YZ= 38.5852 ZZ= 43.3530  
 Eigenvalues: -45.3693 57.3713 75.1240  
 16 I Isotropic = 3658.4948 Anisotropy = 2193.9828  
 XX= 3023.2974 YX= 797.4819 ZX= -274.3551  
 XY= 905.0412 YY= 4376.1494 ZY= -636.4187  
 XZ= -242.1705 YZ= -709.2209 ZZ= 3576.0375  
 Eigenvalues: 2607.5367 3246.7977 5121.1500  
 17 C Isotropic = 62.9824 Anisotropy = 104.0587  
 XX= 39.0536 YX= -24.9975 ZX= 13.9608  
 XY= -14.1763 YY= 31.4422 ZY= 35.9127  
 XZ= 10.0296 YZ= 38.3069 ZZ= 118.4514  
 Eigenvalues: 3.4494 53.1429 132.3549  
 18 N Isotropic = 98.2536 Anisotropy = 127.5634  
 XX= 19.3352 YX= 32.6615 ZX= -2.2854  
 XY= 27.8751 YY= 99.1700 ZY= 28.1989  
 XZ= -0.9236 YZ= 19.3696 ZZ= 176.2558  
 Eigenvalues: 8.6481 102.8169 183.2959  
 19 C Isotropic = 63.7712 Anisotropy = 119.2624  
 XX= 50.4346 YX= -18.9843 ZX= 12.0819  
 XY= -27.7522 YY= 14.9116 ZY= 47.3702  
 XZ= 10.9968 YZ= 46.6384 ZZ= 125.9675  
 Eigenvalues: -12.9183 60.9525 143.2795  
 20 C Isotropic = 72.7078 Anisotropy = 135.1312  
 XX= 52.2427 YX= 22.3085 ZX= -1.4817  
 XY= 25.8446 YY= 20.5066 ZY= 48.9688  
 XZ= -4.3724 YZ= 49.8125 ZZ= 145.3740  
 Eigenvalues: -6.2911 61.6192 162.7952  
 21 C Isotropic = 68.3013 Anisotropy = 147.0807  
 XX= -4.8642 YX= -7.5142 ZX= 12.3571  
 XY= -2.4688 YY= 54.9993 ZY= 38.0024  
 XZ= 10.9987 YZ= 31.9587 ZZ= 154.7688  
 Eigenvalues: -6.7525 45.3013 166.3551  
 22 H Isotropic = 24.3791 Anisotropy = 9.8295  
 XX= 29.1167 YX= -2.3902 ZX= -1.3043  
 XY= -2.9546 YY= 22.1632 ZY= 3.2336  
 XZ= -2.2854 YZ= 3.3645 ZZ= 21.8573  
 Eigenvalues: 18.6742 23.5310 30.9321  
 23 H Isotropic = 24.1197 Anisotropy = 9.7973  
 XX= 23.8631 YX= -0.5705 ZX= 0.0117  
 XY= -0.2418 YY= 25.0977 ZY= 6.4067  
 XZ= 0.1483 YZ= 6.2674 ZZ= 23.3984  
 Eigenvalues: 17.8365 23.8714 30.6513

24 H Isotropic = 24.3264 Anisotropy = 9.5355  
 XX= 23.0383 YX= -0.9661 ZX= -1.1016  
 XY= -1.4651 YY= 24.4535 ZY= 5.2981  
 XZ= -2.7841 YZ= 4.7397 ZZ= 25.4873  
 Eigenvalues: 19.8653 22.4304 30.6834  
 25 H Isotropic = 23.8735 Anisotropy = 9.7993  
 XX= 30.0580 YX= -0.3661 ZX= 1.4356  
 XY= 0.3939 YY= 21.6139 ZY= 4.6182  
 XZ= 1.9204 YZ= 4.3873 ZZ= 19.9486  
 Eigenvalues: 16.0837 25.1305 30.4064  
 26 H Isotropic = 24.4427 Anisotropy = 6.4667  
 XX= 27.5986 YX= -0.5318 ZX= 2.5500  
 XY= -1.7822 YY= 23.3847 ZY= 0.8781  
 XZ= 2.7227 YZ= 1.8301 ZZ= 22.3450  
 Eigenvalues: 20.3066 24.2678 28.7539  
 27 H Isotropic = 22.8836 Anisotropy = 7.6610  
 XX= 27.5415 YX= -1.2590 ZX= -0.7855  
 XY= -1.1367 YY= 24.7102 ZY= -3.0288  
 XZ= -0.6033 YZ= -2.6009 ZZ= 16.3990  
 Eigenvalues: 15.4496 25.2102 27.9909  
 28 H Isotropic = 24.8043 Anisotropy = 3.8322  
 XX= 26.2135 YX= 0.9937 ZX= -0.8870  
 XY= 0.0891 YY= 25.9297 ZY= -1.7252  
 XZ= -1.0384 YZ= -1.8474 ZZ= 22.2697  
 Eigenvalues: 21.4403 25.6135 27.3591  
 29 H Isotropic = 25.5666 Anisotropy = 4.2466  
 XX= 26.2688 YX= 0.6937 ZX= -0.8633  
 XY= 0.7278 YY= 26.5369 ZY= -2.0272  
 XZ= -1.4849 YZ= -2.1929 ZZ= 23.8941  
 Eigenvalues: 22.5888 25.7133 28.3977  
 30 H Isotropic = 25.7875 Anisotropy = 11.6860  
 XX= 24.1071 YX= 0.2960 ZX= -1.8231  
 XY= 3.7098 YY= 27.9012 ZY= -5.8897  
 XZ= -5.2980 YZ= -4.6330 ZZ= 25.3543  
 Eigenvalues: 20.2830 23.5014 33.5782

## Isomer 8 (conformer 4)

1 C Isotropic = 57.5888 Anisotropy = 146.1356  
XX= 27.1719 YX= -31.4916 ZX= -37.5051  
XY= -29.4161 YY= 58.8607 ZY= -80.3427  
XZ= -35.9353 YZ= -80.4303 ZZ= 86.7339  
Eigenvalues: -41.1968 58.9507 155.0126

2 C Isotropic = 46.5297 Anisotropy = 114.7305  
XX= 27.1514 YX= 42.1824 ZX= 25.7607  
XY= 38.8839 YY= 40.3559 ZY= -64.0039  
XZ= 22.6822 YZ= -64.8557 ZZ= 72.0817  
Eigenvalues: -41.9771 58.5494 123.0167

3 C Isotropic = 70.4629 Anisotropy = 124.7852  
XX= -6.8339 YX= 15.0636 ZX= -1.8277  
XY= 10.3203 YY= 100.4173 ZY= -42.8976  
XZ= -6.1988 YZ= -42.8888 ZZ= 117.8053  
Eigenvalues: -8.3243 66.0599 153.6530

4 C Isotropic = 46.8691 Anisotropy = 143.2165  
XX= 11.9302 YX= -15.4413 ZX= -24.0651  
XY= -15.2761 YY= 54.0743 ZY= -74.9404  
XZ= -25.3918 YZ= -78.5591 ZZ= 74.6028  
Eigenvalues: -31.2312 29.4918 142.3468

5 C Isotropic = 57.8132 Anisotropy = 167.9364  
XX= 1.1769 YX= 18.5235 ZX= 0.0858  
XY= 17.7648 YY= 70.8851 ZY= -80.5762  
XZ= -4.5098 YZ= -81.7574 ZZ= 101.3775  
Eigenvalues: -10.7938 14.4625 169.7708

6 C Isotropic = 60.6816 Anisotropy = 175.1609  
XX= -33.6864 YX= -2.2461 ZX= -21.2597  
XY= -1.5846 YY= 93.0635 ZY= -67.1718  
XZ= -21.0611 YZ= -66.5352 ZZ= 122.6678  
Eigenvalues: -37.6029 42.1923 177.4555

7 N Isotropic = 116.0056 Anisotropy = 86.9245  
XX= 59.9026 YX= -12.9241 ZX= -20.9328  
XY= -16.5534 YY= 145.4910 ZY= -26.4212  
XZ= -31.0167 YZ= -32.2556 ZZ= 142.6231  
Eigenvalues: 47.0713 126.9901 173.9552

8 C Isotropic = 59.3259 Anisotropy = 116.2854  
XX= 50.4570 YX= 25.1327 ZX= 15.1452  
XY= 21.7206 YY= 51.3755 ZY= -71.6247  
XZ= 9.8466 YZ= -71.6807 ZZ= 76.1453  
Eigenvalues: -18.7297 59.8580 136.8495

9 C Isotropic = 76.5242 Anisotropy = 111.6370  
XX= 38.5483 YX= 26.1759 ZX= 12.4544  
XY= 30.8489 YY= 84.1825 ZY= -53.3823  
XZ= 15.5074 YZ= -54.1562 ZZ= 106.8418  
Eigenvalues: 8.4044 70.2194 150.9488

10 C Isotropic = 66.5904 Anisotropy = 96.0774  
XX= -0.5967 YX= -8.9687 ZX= 31.0254  
XY= -5.9303 YY= 80.0963 ZY= 13.0047  
XZ= 38.5436 YZ= 6.1333 ZZ= 120.2717  
Eigenvalues: -10.9235 80.0528 130.6420

11 Br Isotropic = 1883.0725 Anisotropy = 1580.1787  
XX= 1805.0034 YX= -548.5168 ZX= -406.2013  
XY= -531.6108 YY= 2083.4544 ZY= 587.4494  
XZ= -404.0116 YZ= 592.4926 ZZ= 1760.7596  
Eigenvalues: 1310.2111 1402.4814 2936.5249

12 C Isotropic = 25.9400 Anisotropy = 143.0097  
XX= 19.4458 YX= -7.0698 ZX= 23.1093



XY= -33.8567 YY= -46.4908 ZY= 46.2871  
 XZ= 29.3475 YZ= 43.7735 ZZ= 104.8650  
 Eigenvalues: -67.2922 23.8324 121.2798  
 13 N Isotropic = -158.6025 Anisotropy = 274.3877  
 XX= -153.9563 YX= 41.0110 ZX= 33.2288  
 XY= 30.3654 YY= -323.9867 ZY= 80.1654  
 XZ= 22.8148 YZ= 64.3957 ZZ= 2.1354  
 Eigenvalues: -343.8320 -156.2982 24.3226  
 14 O Isotropic = -72.2213 Anisotropy = 259.2661  
 XX= -142.3749 YX= 47.7516 ZX= 46.8137  
 XY= 59.9825 YY= -138.4684 ZY= 48.6767  
 XZ= 72.7913 YZ= 65.3090 ZZ= 64.1793  
 Eigenvalues: -194.3861 -122.9005 100.6228  
 15 C Isotropic = 30.6827 Anisotropy = 70.0382  
 XX= 26.5724 YX= -55.6296 ZX= 27.8821  
 XY= -45.7403 YY= 16.5562 ZY= 26.0719  
 XZ= 6.2811 YZ= 38.5291 ZZ= 48.9195  
 Eigenvalues: -43.0961 57.7694 77.3749  
 16 I Isotropic = 3667.5495 Anisotropy = 2187.3228  
 XX= 3068.6871 YX= 846.6912 ZX= -264.9002  
 XY= 950.8796 YY= 4388.0614 ZY= -570.0274  
 XZ= -191.3187 YZ= -695.3324 ZZ= 3545.9000  
 Eigenvalues: 2604.3380 3272.5457 5125.7647  
 17 C Isotropic = 62.8768 Anisotropy = 104.6108  
 XX= 51.0529 YX= 24.1973 ZX= -31.0398  
 XY= 22.1687 YY= 21.2720 ZY= 30.5473  
 XZ= -30.8053 YZ= 30.8794 ZZ= 116.3055  
 Eigenvalues: -5.9325 61.9456 132.6173  
 18 N Isotropic = 92.7324 Anisotropy = 139.2956  
 XX= 19.3613 YX= -33.8339 ZX= -41.6965  
 XY= -19.4967 YY= 86.1137 ZY= 12.7335  
 XZ= -39.0162 YZ= 8.5494 ZZ= 172.7222  
 Eigenvalues: 2.7355 89.8655 185.5961  
 19 C Isotropic = 63.7629 Anisotropy = 120.1221  
 XX= 60.4110 YX= 12.0226 ZX= -27.8750  
 XY= 23.3818 YY= 4.6292 ZY= 36.6348  
 XZ= -32.3862 YZ= 36.4688 ZZ= 126.2484  
 Eigenvalues: -14.4055 61.8499 143.8443  
 20 C Isotropic = 71.9479 Anisotropy = 138.5471  
 XX= 56.8718 YX= -28.9287 ZX= -26.3166  
 XY= -32.0098 YY= 9.0717 ZY= 23.7145  
 XZ= -31.9301 YZ= 21.5916 ZZ= 149.9002  
 Eigenvalues: -6.1704 57.7015 164.3126  
 21 C Isotropic = 70.9287 Anisotropy = 139.1627  
 XX= 16.3948 YX= 9.9619 ZX= -49.2273  
 XY= 5.0566 YY= 52.9655 ZY= 25.5344  
 XZ= -52.6021 YZ= 14.0538 ZZ= 143.4257  
 Eigenvalues: -4.8068 53.8890 163.7038  
 22 H Isotropic = 24.4731 Anisotropy = 10.1649  
 XX= 29.0458 YX= -2.5694 ZX= -1.7345  
 XY= -3.0348 YY= 22.4235 ZY= 3.3344  
 XZ= -2.5561 YZ= 3.5323 ZZ= 21.9499  
 Eigenvalues: 18.7313 23.4382 31.2497  
 23 H Isotropic = 24.1499 Anisotropy = 9.8077  
 XX= 23.9825 YX= -0.2547 ZX= 0.1910  
 XY= 0.0251 YY= 25.6648 ZY= 6.3719  
 XZ= 0.2129 YZ= 6.2159 ZZ= 22.8024  
 Eigenvalues: 17.7706 23.9907 30.6884

24 H Isotropic = 24.5547 Anisotropy = 9.2517  
 XX= 23.2856 YX= -0.1940 ZX= -1.9257  
 XY= -0.8725 YY= 24.2477 ZY= 5.2098  
 XZ= -3.1826 YZ= 4.2031 ZZ= 26.1310  
 Eigenvalues: 19.8827 23.0590 30.7226  
 25 H Isotropic = 23.8333 Anisotropy = 9.7738  
 XX= 30.1242 YX= -0.3564 ZX= 1.3188  
 XY= 0.3197 YY= 22.0751 ZY= 4.5865  
 XZ= 1.4985 YZ= 4.2342 ZZ= 19.3008  
 Eigenvalues: 15.9713 25.1796 30.3492  
 26 H Isotropic = 24.3129 Anisotropy = 6.8141  
 XX= 27.6420 YX= -0.8151 ZX= 2.5846  
 XY= -2.2976 YY= 23.7094 ZY= 0.7385  
 XZ= 2.6856 YZ= 1.6054 ZZ= 21.5872  
 Eigenvalues: 19.8734 24.2096 28.8556  
 27 H Isotropic = 24.2249 Anisotropy = 10.6966  
 XX= 25.8501 YX= 2.4941 ZX= 0.5555  
 XY= 5.6834 YY= 25.6242 ZY= -5.2376  
 XZ= -2.2252 YZ= -3.9209 ZZ= 21.2003  
 Eigenvalues: 17.9912 23.3275 31.3559  
 28 H Isotropic = 25.2347 Anisotropy = 4.7235  
 XX= 25.5096 YX= -0.0198 ZX= 0.5372  
 XY= 1.9172 YY= 26.9448 ZY= -2.0939  
 XZ= -0.8785 YZ= -2.5969 ZZ= 23.2498  
 Eigenvalues: 22.0909 25.2296 28.3837  
 29 H Isotropic = 25.2622 Anisotropy = 3.0735  
 XX= 26.3597 YX= 0.3614 ZX= 0.5140  
 XY= 1.1934 YY= 26.3440 ZY= -0.9246  
 XZ= -0.4402 YZ= -1.5047 ZZ= 23.0827  
 Eigenvalues: 22.6582 25.8172 27.3111  
 30 H Isotropic = 24.4992 Anisotropy = 4.2430  
 XX= 25.5610 YX= 1.0998 ZX= -0.0133  
 XY= 1.0539 YY= 26.6716 ZY= -0.9621  
 XZ= 0.8131 YZ= 0.4591 ZZ= 21.2650  
 Eigenvalues: 21.2047 24.9650 27.3279

## Isomer 9 (conformer 1)

1 C Isotropic = 56.2328 Anisotropy = 146.4218  
XX= -11.7839 YX= 40.6280 ZX= -18.3827  
XY= 43.2568 YY= 58.8057 ZY= 54.9986  
XZ= -19.8632 YZ= 55.2746 ZZ= 121.6764  
Eigenvalues: -42.3372 57.1882 153.8473

2 C Isotropic = 46.2740 Anisotropy = 115.5920  
XX= -9.7964 YX= -36.6055 ZX= 26.8090  
XY= -40.2880 YY= 52.2092 ZY= 43.8771  
XZ= 27.9325 YZ= 43.4419 ZZ= 96.4092  
Eigenvalues: -42.5155 58.0022 123.3353

3 C Isotropic = 70.2417 Anisotropy = 125.1461  
XX= 66.2254 YX= -2.6115 ZX= 4.5343  
XY= -6.3655 YY= 33.5964 ZY= 71.2805  
XZ= 6.8343 YZ= 71.8710 ZZ= 110.9033  
Eigenvalues: -9.6996 66.7522 153.6724

4 C Isotropic = 47.1397 Anisotropy = 139.0340  
XX= -11.4440 YX= 26.2504 ZX= -10.9434  
XY= 27.6151 YY= 46.1499 ZY= 54.9695  
XZ= -11.4801 YZ= 56.1601 ZZ= 106.7134  
Eigenvalues: -30.6066 32.1967 139.8291

5 C Isotropic = 59.7042 Anisotropy = 162.3075  
XX= 5.0857 YX= -11.9126 ZX= 12.6945  
XY= -12.8697 YY= 48.5284 ZY= 71.5108  
XZ= 13.3877 YZ= 70.4643 ZZ= 125.4986  
Eigenvalues: -11.7215 22.9250 167.9092

6 C Isotropic = 58.7352 Anisotropy = 172.2127  
XX= 36.2021 YX= 13.0206 ZX= -2.8115  
XY= 18.0539 YY= 20.2582 ZY= 90.3762  
XZ= -3.7746 YZ= 90.8127 ZZ= 119.7452  
Eigenvalues: -36.4723 39.1342 173.5437

7 N Isotropic = 111.7867 Anisotropy = 89.1924  
XX= 112.5013 YX= 29.3311 ZX= -15.9015  
XY= 22.7697 YY= 81.0938 ZY= 53.1100  
XZ= -11.9911 YZ= 49.9720 ZZ= 141.7651  
Eigenvalues: 39.6476 124.4643 171.2484

8 C Isotropic = 59.9495 Anisotropy = 119.7253  
XX= -1.7567 YX= -9.3244 ZX= 9.7310  
XY= -19.7214 YY= 63.9027 ZY= 45.4458  
XZ= 13.3617 YZ= 36.1933 ZZ= 117.7024  
Eigenvalues: -8.4503 48.5324 139.7664

9 C Isotropic = 75.8922 Anisotropy = 109.3284  
XX= 34.7548 YX= -21.5447 ZX= 16.3697  
XY= -12.7369 YY= 71.0421 ZY= 45.9303  
XZ= 12.1727 YZ= 45.2487 ZZ= 121.8796  
Eigenvalues: 16.9336 61.9652 148.7778

10 C Isotropic = 16.7199 Anisotropy = 123.6923  
XX= 1.8364 YX= 23.2963 ZX= -1.5630  
XY= 0.4931 YY= -17.9408 ZY= 61.2857  
XZ= 6.2683 YZ= 61.4426 ZZ= 66.2641  
Eigenvalues: -51.9227 2.9010 99.1814

11 Br Isotropic = 1888.1042 Anisotropy = 1579.2272  
XX= 2527.8804 YX= 553.8843 ZX= -376.8765  
XY= 571.3283 YY= 1670.2774 ZY= -234.4547  
XZ= -386.1901 YZ= -230.8465 ZZ= 1466.1547  
Eigenvalues: 1313.7153 1409.6750 2940.9223

12 C Isotropic = 73.5078 Anisotropy = 77.8018  
XX= 48.8282 YX= 20.7303 ZX= -2.7744

XY= 27.9511 YY= 59.0907 ZY= 29.4023  
 XZ= -11.8637 YZ= 28.4205 ZZ= 112.6046  
 Eigenvalues: 22.3360 72.8118 125.3757  
 13 C Isotropic = 26.9466 Anisotropy = 78.7385  
 XX= 28.4609 YX= -61.6816 ZX= 39.9192  
 XY= -36.4203 YY= 3.4804 ZY= 42.9851  
 XZ= 23.3404 YZ= 53.3202 ZZ= 48.8985  
 Eigenvalues: -63.9212 65.3221 79.4389  
 14 N Isotropic = -134.2929 Anisotropy = 263.0702  
 XX= -206.6386 YX= -80.8301 ZX= 64.4302  
 XY= -61.1998 YY= -168.2531 ZY= 113.9138  
 XZ= 70.1971 YZ= 120.6099 ZZ= -27.9871  
 Eigenvalues: -317.3769 -126.5890 41.0872  
 15 O Isotropic = -75.4812 Anisotropy = 276.4485  
 XX= -166.3353 YX= 58.6587 ZX= -2.7775  
 XY= 55.1969 YY= -109.4165 ZY= 109.0826  
 XZ= 4.6025 YZ= 112.2200 ZZ= 49.3081  
 Eigenvalues: -217.6301 -117.6314 108.8178  
 16 I Isotropic = 3754.2728 Anisotropy = 2055.0843  
 XX= 3805.8843 YX= 950.4177 ZX= -597.1998  
 XY= 1022.7944 YY= 3833.3029 ZY= -354.2304  
 XZ= -603.4476 YZ= -394.6204 ZZ= 3623.6311  
 Eigenvalues: 2787.8690 3350.6203 5124.3290  
 17 C Isotropic = 63.8499 Anisotropy = 107.7931  
 XX= 50.0743 YX= 45.2948 ZX= -14.7327  
 XY= 49.9124 YY= 39.3827 ZY= -39.4932  
 XZ= -14.6873 YZ= -37.3704 ZZ= 102.0927  
 Eigenvalues: -6.8925 62.7302 135.7120  
 18 N Isotropic = 93.5502 Anisotropy = 115.9502  
 XX= 77.8202 YX= -10.4270 ZX= -52.6903  
 XY= -21.3259 YY= 94.9892 ZY= -57.0306  
 XZ= -60.3816 YZ= -53.8280 ZZ= 107.8413  
 Eigenvalues: 7.2959 102.5044 170.8504  
 19 C Isotropic = 66.6589 Anisotropy = 116.4603  
 XX= 44.5811 YX= 59.6083 ZX= -16.3909  
 XY= 48.4020 YY= 46.6609 ZY= -36.6782  
 XZ= -22.0092 YZ= -35.8937 ZZ= 108.7348  
 Eigenvalues: -9.7076 65.3853 144.2991  
 20 C Isotropic = 70.9176 Anisotropy = 139.2726  
 XX= 22.3312 YX= 31.5923 ZX= -56.0966  
 XY= 35.3470 YY= 82.4266 ZY= -33.6911  
 XZ= -56.6473 YZ= -38.5238 ZZ= 107.9949  
 Eigenvalues: -8.2183 57.2050 163.7660  
 21 C Isotropic = 69.6193 Anisotropy = 139.1105  
 XX= 71.7273 YX= 20.2760 ZX= -34.9758  
 XY= 22.7857 YY= 38.2394 ZY= -69.0223  
 XZ= -32.6710 YZ= -70.4825 ZZ= 98.8912  
 Eigenvalues: -7.4985 53.9968 162.3596  
 22 H Isotropic = 24.0434 Anisotropy = 9.9954  
 XX= 24.8135 YX= 2.6006 ZX= -1.7739  
 XY= 2.4134 YY= 26.2378 ZY= -4.8353  
 XZ= -1.6673 YZ= -4.8459 ZZ= 21.0788  
 Eigenvalues: 18.1675 23.2557 30.7070  
 23 H Isotropic = 24.2014 Anisotropy = 10.3892  
 XX= 31.1100 YX= -0.6528 ZX= -0.0846  
 XY= 0.0244 YY= 22.2143 ZY= -2.6488  
 XZ= -0.6394 YZ= -2.6520 ZZ= 19.2801  
 Eigenvalues: 17.7013 23.7755 31.1276

24 H Isotropic = 23.0040 Anisotropy = 10.2523  
 XX= 29.1097 YX= 1.3262 ZX= -1.1753  
 XY= 1.9472 YY= 21.9588 ZY= -3.2735  
 XZ= -1.5699 YZ= -3.0800 ZZ= 17.9435  
 Eigenvalues: 16.1794 22.9938 29.8388  
 25 H Isotropic = 24.0470 Anisotropy = 8.8466  
 XX= 26.5739 YX= -0.7540 ZX= 0.0384  
 XY= 0.0112 YY= 25.9933 ZY= -6.2045  
 XZ= -0.6328 YZ= -6.5816 ZZ= 19.5739  
 Eigenvalues: 15.6117 26.5846 29.9448  
 26 H Isotropic = 24.8767 Anisotropy = 12.5628  
 XX= 27.3708 YX= 2.9641 ZX= -2.7486  
 XY= 2.7009 YY= 25.6392 ZY= -5.2472  
 XZ= -5.2958 YZ= -5.7769 ZZ= 21.6201  
 Eigenvalues: 17.4211 23.9572 33.2519  
 27 H Isotropic = 24.0938 Anisotropy = 4.3946  
 XX= 25.2145 YX= -0.3868 ZX= 2.0609  
 XY= -1.3826 YY= 24.7080 ZY= 2.9232  
 XZ= 0.4310 YZ= 3.6497 ZZ= 22.3589  
 Eigenvalues: 19.6256 25.6322 27.0235  
 28 H Isotropic = 24.6898 Anisotropy = 3.9279  
 XX= 25.7914 YX= -0.8259 ZX= 1.2371  
 XY= -2.2932 YY= 25.6000 ZY= 1.0212  
 XZ= -0.1871 YZ= 1.4256 ZZ= 22.6779  
 Eigenvalues: 21.9291 24.8318 27.3084  
 29 H Isotropic = 25.0181 Anisotropy = 2.8266  
 XX= 26.1930 YX= -0.7246 ZX= 1.3919  
 XY= -0.9454 YY= 25.4581 ZY= 0.5548  
 XZ= 0.9948 YZ= 0.5944 ZZ= 23.4031  
 Eigenvalues: 22.7050 25.4468 26.9025  
 30 H Isotropic = 25.1098 Anisotropy = 5.9823  
 XX= 26.0528 YX= -1.1419 ZX= 2.3445  
 XY= -0.2776 YY= 24.5935 ZY= -1.3463  
 XZ= 4.2058 YZ= -1.0626 ZZ= 24.6832  
 Eigenvalues: 21.9238 24.3076 29.0980

## Isomer 9 (conformer 2)

1 C Isotropic = 56.6790 Anisotropy = 145.1158  
XX= -10.3442 YX= 18.0055 ZX= -52.8272  
XY= 18.6348 YY= 71.9876 ZY= 52.9737  
XZ= -52.0153 YZ= 53.4672 ZZ= 108.3935  
Eigenvalues: -42.6530 59.2670 153.4228

2 C Isotropic = 46.6118 Anisotropy = 114.8641  
XX= 4.1674 YX= -53.0510 ZX= -1.0432  
XY= -57.8176 YY= 33.3008 ZY= 35.8559  
XZ= 0.9573 YZ= 37.1504 ZZ= 102.3673  
Eigenvalues: -42.1858 58.8333 123.1879

3 C Isotropic = 70.6760 Anisotropy = 124.3303  
XX= 70.7850 YX= -7.3525 ZX= -16.7557  
XY= -11.5147 YY= 27.8594 ZY= 67.4447  
XZ= -13.8849 YZ= 65.5055 ZZ= 113.3835  
Eigenvalues: -8.4313 66.8964 153.5629

4 C Isotropic = 46.5530 Anisotropy = 138.5142  
XX= -9.5006 YX= 6.8056 ZX= -39.5329  
XY= 4.9229 YY= 48.3269 ZY= 51.2520  
XZ= -42.5963 YZ= 50.2169 ZZ= 100.8328  
Eigenvalues: -30.3593 31.1226 138.8958

5 C Isotropic = 60.4426 Anisotropy = 161.9106  
XX= 14.8823 YX= -32.4513 ZX= -21.1334  
XY= -32.9761 YY= 41.6736 ZY= 64.5668  
XZ= -19.7185 YZ= 66.6759 ZZ= 124.7720  
Eigenvalues: -11.9223 24.8671 168.3830

6 C Isotropic = 58.6882 Anisotropy = 176.1455  
XX= 34.9980 YX= -0.1750 ZX= -34.8913  
XY= 2.5906 YY= 28.7042 ZY= 89.4275  
XZ= -37.7786 YZ= 90.2910 ZZ= 112.3625  
Eigenvalues: -35.0206 34.9667 176.1185

7 N Isotropic = 111.9775 Anisotropy = 91.8218  
XX= 110.0203 YX= 25.3482 ZX= -30.0077  
XY= 12.6140 YY= 92.6953 ZY= 48.1092  
XZ= -31.3841 YZ= 56.9234 ZZ= 133.2170  
Eigenvalues: 40.5849 122.1555 173.1921

8 C Isotropic = 59.0782 Anisotropy = 119.1314  
XX= 1.9603 YX= -32.0472 ZX= -16.0157  
XY= -40.4632 YY= 62.2180 ZY= 33.5208  
XZ= -10.3580 YZ= 39.7504 ZZ= 113.0562  
Eigenvalues: -15.1679 53.9033 138.4991

9 C Isotropic = 75.9109 Anisotropy = 106.1533  
XX= 40.7112 YX= -36.0440 ZX= -3.1243  
XY= -32.0001 YY= 64.2998 ZY= 38.7815  
XZ= -5.0891 YZ= 41.0582 ZZ= 122.7217  
Eigenvalues: 12.3426 68.7102 146.6797

10 C Isotropic = 19.1595 Anisotropy = 122.8204  
XX= -20.0560 YX= -25.0598 ZX= 40.8387  
XY= -4.4475 YY= -0.0793 ZY= 38.1016  
XZ= 27.7690 YZ= 44.0555 ZZ= 77.6138  
Eigenvalues: -48.5394 4.9780 101.0398

11 Br Isotropic = 1889.3067 Anisotropy = 1574.7978  
XX= 2361.1199 YX= 729.3464 ZX= -134.4059  
XY= 738.4644 YY= 1936.3994 ZY= -152.4870  
XZ= -144.3108 YZ= -153.9104 ZZ= 1370.4008  
Eigenvalues: 1320.9067 1407.8415 2939.1719

12 C Isotropic = 70.9524 Anisotropy = 85.8500  
XX= 25.0232 YX= 11.4690 ZX= 25.1557

XY= 1.5032 YY= 76.8876 ZY= 19.8457  
 XZ= 30.7326 YZ= 21.0074 ZZ= 110.9465  
 Eigenvalues: 16.7317 67.9398 128.1858  
 13 C Isotropic = 27.6315 Anisotropy = 77.2286  
 XX= 63.1299 YX= -5.5481 ZX= 7.4224  
 XY= -36.9805 YY= -44.7020 ZY= 49.2141  
 XZ= 8.9158 YZ= 35.7902 ZZ= 64.4667  
 Eigenvalues: -63.3938 67.1711 79.1173  
 14 N Isotropic = -137.7928 Anisotropy = 275.1310  
 XX= -114.3224 YX= 14.3224 ZX= 29.7895  
 XY= 18.4412 YY= -295.3218 ZY= 119.1551  
 XZ= 59.1969 YZ= 95.7682 ZZ= -3.7344  
 Eigenvalues: -330.6596 -128.3468 45.6278  
 15 O Isotropic = -76.3975 Anisotropy = 257.3603  
 XX= -195.5414 YX= 25.6419 ZX= 57.0033  
 XY= 30.9654 YY= -87.4934 ZY= 53.5208  
 XZ= 71.5217 YZ= 73.6920 ZZ= 53.8423  
 Eigenvalues: -212.5711 -111.7975 95.1760  
 16 I Isotropic = 3738.2682 Anisotropy = 2042.1340  
 XX= 2802.1124 YX= 92.3635 ZX= 46.0293  
 XY= 80.7644 YY= 4942.5744 ZY= -529.1923  
 XZ= 148.1467 YZ= -478.2971 ZZ= 3470.1176  
 Eigenvalues: 2774.8958 3340.2179 5099.6908  
 17 C Isotropic = 63.7832 Anisotropy = 109.2389  
 XX= 28.2055 YX= 28.5246 ZX= 36.2307  
 XY= 25.5235 YY= 125.2662 ZY= 11.6848  
 XZ= 39.5227 YZ= 9.1199 ZZ= 37.8780  
 Eigenvalues: -6.5995 61.3400 136.6092  
 18 N Isotropic = 87.6326 Anisotropy = 127.5823  
 XX= 87.2734 YX= 32.1052 ZX= -24.1820  
 XY= 42.4314 YY= 148.3915 ZY= 42.3052  
 XZ= -37.6097 YZ= 50.3496 ZZ= 27.2329  
 Eigenvalues: -7.1817 97.3920 172.6874  
 19 C Isotropic = 65.3936 Anisotropy = 120.0984  
 XX= 14.9746 YX= 27.4685 ZX= 41.0241  
 XY= 30.1397 YY= 134.4694 ZY= 8.4267  
 XZ= 31.0842 YZ= 16.2062 ZZ= 46.7369  
 Eigenvalues: -10.7529 61.4745 145.4592  
 20 C Isotropic = 71.5745 Anisotropy = 139.1457  
 XX= 9.8569 YX= 47.8764 ZX= -8.6314  
 XY= 42.9820 YY= 145.8677 ZY= 22.5166  
 XZ= -5.2011 YZ= 27.8893 ZZ= 58.9988  
 Eigenvalues: -6.9996 57.3847 164.3383  
 21 C Isotropic = 69.3596 Anisotropy = 141.7011  
 XX= 61.3869 YX= 28.6352 ZX= 15.8102  
 XY= 29.3020 YY= 147.1407 ZY= 29.6931  
 XZ= 22.2676 YZ= 33.4410 ZZ= -0.4489  
 Eigenvalues: -9.4717 53.7234 163.8270  
 22 H Isotropic = 24.5490 Anisotropy = 12.1331  
 XX= 23.6832 YX= 3.7859 ZX= -0.2409  
 XY= 3.8494 YY= 29.5553 ZY= -4.3746  
 XZ= 0.2233 YZ= -4.0540 ZZ= 20.4087  
 Eigenvalues: 18.3272 22.6822 32.6377  
 23 H Isotropic = 24.2339 Anisotropy = 9.7061  
 XX= 30.1187 YX= 1.3064 ZX= 2.3639  
 XY= 1.6632 YY= 23.0455 ZY= -2.4333  
 XZ= 2.0882 YZ= -2.3491 ZZ= 19.5374  
 Eigenvalues: 17.7544 24.2427 30.7047

24 H Isotropic = 25.2079 Anisotropy = 13.5834  
 XX= 25.4970 YX= 5.1383 ZX= 1.9167  
 XY= 2.9474 YY= 32.3432 ZY= -0.1286  
 XZ= 1.9691 YZ= 0.2292 ZZ= 17.7834  
 Eigenvalues: 17.2626 24.0975 34.2635  
 25 H Isotropic = 23.8157 Anisotropy = 9.6020  
 XX= 25.6458 YX= -0.5937 ZX= 2.5005  
 XY= -0.4508 YY= 26.5678 ZY= -5.9957  
 XZ= 1.8224 YZ= -5.4698 ZZ= 19.2334  
 Eigenvalues: 15.8153 25.4147 30.2170  
 26 H Isotropic = 23.8866 Anisotropy = 6.0719  
 XX= 25.0895 YX= 0.6723 ZX= 0.4445  
 XY= -0.5473 YY= 25.0976 ZY= -3.7180  
 XZ= 1.7182 YZ= -4.6139 ZZ= 21.4727  
 Eigenvalues: 18.6055 25.1198 27.9346  
 27 H Isotropic = 24.1440 Anisotropy = 3.2104  
 XX= 24.0213 YX= -2.6763 ZX= 0.6686  
 XY= -2.6781 YY= 22.5095 ZY= -1.7974  
 XZ= -0.8997 YZ= 0.5665 ZZ= 25.9013  
 Eigenvalues: 20.4260 25.7218 26.2843  
 28 H Isotropic = 24.9945 Anisotropy = 3.7040  
 XX= 26.0321 YX= -1.6504 ZX= -0.5644  
 XY= -1.4087 YY= 23.9000 ZY= -1.1731  
 XZ= -2.3837 YZ= 0.6515 ZZ= 25.0513  
 Eigenvalues: 22.6893 24.8304 27.4638  
 29 H Isotropic = 25.0774 Anisotropy = 2.9076  
 XX= 26.5013 YX= -1.0567 ZX= -0.1556  
 XY= -1.3501 YY= 24.1874 ZY= -1.7219  
 XZ= -0.8049 YZ= -0.8537 ZZ= 24.5434  
 Eigenvalues: 22.6689 25.5475 27.0158  
 30 H Isotropic = 24.9229 Anisotropy = 6.7088  
 XX= 29.0809 YX= 0.6384 ZX= 0.7838  
 XY= 1.4144 YY= 22.8627 ZY= -1.3461  
 XZ= 1.7170 YZ= -2.3020 ZZ= 22.8252  
 Eigenvalues: 20.7097 24.6637 29.3954



### Isomer 9 (conformer 3)

1 C Isotropic = 56.2536 Anisotropy = 146.4104

XX= -3.7190 YX= 46.9659 ZX= -7.5979

XY= 49.7006 YY= 19.4390 ZY= 9.4025

XZ= -7.9506 YZ= 9.8115 ZZ= 153.0408

Eigenvalues: -42.5838 57.4841 153.8606

2 C Isotropic = 46.4100 Anisotropy = 115.1988

XX= -17.5110 YX= -41.8509 ZX= -1.7997

XY= -45.5686 YY= 33.8402 ZY= 3.9210

XZ= -2.6528 YZ= 3.7971 ZZ= 122.9007

Eigenvalues: -42.5284 58.5492 123.2092

3 C Isotropic = 70.1722 Anisotropy = 125.0507

XX= 64.6341 YX= -11.0712 ZX= -1.9723

XY= -15.6334 YY= -7.0424 ZY= 8.8966

XZ= -2.0528 YZ= 9.4945 ZZ= 152.9249

Eigenvalues: -9.9134 66.8907 153.5393

4 C Isotropic = 47.0998 Anisotropy = 139.5277

XX= -6.7421 YX= 29.2299 ZX= -5.8803

XY= 30.8938 YY= 8.6557 ZY= 8.4613

XZ= -6.4101 YZ= 9.4911 ZZ= 139.3857

Eigenvalues: -30.7067 31.8878 140.1182

5 C Isotropic = 59.3283 Anisotropy = 162.2956

XX= 1.4975 YX= -16.7233 ZX= -4.0598

XY= -17.5748 YY= 9.5103 ZY= 8.6417

XZ= -3.5923 YZ= 7.5259 ZZ= 166.9771

Eigenvalues: -12.1301 22.5897 167.5254

6 C Isotropic = 58.5713 Anisotropy = 172.0135

XX= 37.9138 YX= 6.2211 ZX= -4.4798

XY= 11.1959 YY= -34.6416 ZY= 12.3751

XZ= -2.8693 YZ= 12.2867 ZZ= 172.4416

Eigenvalues: -36.4418 38.9087 173.2469

7 N Isotropic = 112.5020 Anisotropy = 88.5321

XX= 117.9901 YX= 26.5089 ZX= -2.9721

XY= 19.2527 YY= 48.1471 ZY= 7.4437

XZ= 0.6340 YZ= 1.2170 ZZ= 171.3687

Eigenvalues: 41.1645 124.8181 171.5234

8 C Isotropic = 60.3710 Anisotropy = 122.9838

XX= -6.6561 YX= -14.5229 ZX= -2.7834

XY= -20.2503 YY= 46.0618 ZY= 4.3190

XZ= -8.5147 YZ= -18.5008 ZZ= 141.7072

Eigenvalues: -12.2353 50.9880 142.3601

9 C Isotropic = 76.2087 Anisotropy = 107.7721

XX= 31.4047 YX= -25.4335 ZX= -2.1347

XY= -17.1546 YY= 49.4019 ZY= 4.5573

XZ= -0.1654 YZ= 4.2771 ZZ= 147.8196

Eigenvalues: 17.2691 63.3003 148.0568

10 C Isotropic = 16.7206 Anisotropy = 123.6357

XX= -0.5350 YX= 19.4946 ZX= 4.0415

XY= -5.6821 YY= -48.3806 ZY= 1.0037

XZ= -2.3246 YZ= 4.7922 ZZ= 99.0776

Eigenvalues: -49.4085 0.4260 99.1444

11 Br Isotropic = 1891.6155 Anisotropy = 1573.0982

XX= 2638.4910 YX= 598.8397 ZX= 4.6985

XY= 617.3041 YY= 1715.4182 ZY= -4.9040

XZ= -2.5382 YZ= -5.3666 ZZ= 1320.9373

Eigenvalues: 1320.6585 1413.8405 2940.3477

12 C Isotropic = 73.1812 Anisotropy = 77.9953

XX= 50.5026 YX= 19.0471 ZX= 1.2765

XY= 29.4372 YY= 44.0514 ZY= -2.2331  
 XZ= -2.1382 YZ= -4.8703 ZZ= 124.9895  
 Eigenvalues: 22.7653 71.6002 125.1780  
 13 C Isotropic = 28.7196 Anisotropy = 78.5622  
 XX= 23.0486 YX= -78.5553 ZX= 3.3765  
 XY= -48.1846 YY= -16.6196 ZY= 3.8021  
 XZ= 0.9843 YZ= 13.0582 ZZ= 79.7297  
 Eigenvalues: -63.6430 68.7073 81.0943  
 14 N Isotropic = -133.3263 Anisotropy = 267.9005  
 XX= -220.6331 YX= -102.9373 ZX= 6.3466  
 XY= -86.7169 YY= -223.7884 ZY= 2.3046  
 XZ= 22.8017 YZ= 13.6255 ZZ= 44.4427  
 Eigenvalues: -317.7490 -127.5038 45.2740  
 15 O Isotropic = -76.9531 Anisotropy = 273.3204  
 XX= -161.9233 YX= 52.0790 ZX= 9.4200  
 XY= 47.9741 YY= -173.3937 ZY= 0.8922  
 XZ= 17.9289 YZ= 4.5193 ZZ= 104.4577  
 Eigenvalues: -218.1689 -117.9509 105.2605  
 16 I Isotropic = 3779.0853 Anisotropy = 2021.4661  
 XX= 4030.9192 YX= 1101.9301 ZX= -70.6687  
 XY= 1165.2857 YY= 3945.9510 ZY= -27.7677  
 XZ= -67.8473 YZ= -67.4089 ZZ= 3360.3855  
 Eigenvalues: 2853.6548 3356.8716 5126.7293  
 17 C Isotropic = 63.2407 Anisotropy = 108.7785  
 XX= 16.8212 YX= 37.8773 ZX= -36.4021  
 XY= 33.7615 YY= 103.1176 ZY= -24.7185  
 XZ= -41.0761 YZ= -20.2460 ZZ= 69.7833  
 Eigenvalues: -8.2156 62.1780 135.7597  
 18 N Isotropic = 87.0818 Anisotropy = 125.3102  
 XX= 103.4873 YX= 20.2634 ZX= -17.9703  
 XY= 25.3730 YY= 106.1801 ZY= -76.7925  
 XZ= -12.1578 YZ= -74.9122 ZZ= 51.5778  
 Eigenvalues: -1.7433 92.3667 170.6219  
 19 C Isotropic = 65.1412 Anisotropy = 118.8973  
 XX= 13.5364 YX= 40.2454 ZX= -38.5062  
 XY= 47.9173 YY= 106.4826 ZY= -20.7138  
 XZ= -31.7704 YZ= -29.7639 ZZ= 75.4046  
 Eigenvalues: -11.1167 62.1343 144.4061  
 20 C Isotropic = 72.7146 Anisotropy = 136.5322  
 XX= 42.9987 YX= 61.7800 ZX= -0.6818  
 XY= 58.0618 YY= 98.1788 ZY= -52.7925  
 XZ= -5.8578 YZ= -55.4041 ZZ= 76.9663  
 Eigenvalues: -5.7949 60.2026 163.7361  
 21 C Isotropic = 72.1562 Anisotropy = 137.6119  
 XX= 54.4857 YX= 25.2312 ZX= -43.5764  
 XY= 23.2971 YY= 115.3716 ZY= -52.9691  
 XZ= -60.2329 YZ= -50.4674 ZZ= 46.6113  
 Eigenvalues: -6.2944 58.8655 163.8975  
 22 H Isotropic = 24.0444 Anisotropy = 10.0160  
 XX= 25.3165 YX= 3.5232 ZX= 0.0085  
 XY= 3.2478 YY= 28.5872 ZY= -0.4446  
 XZ= 0.0380 YZ= -0.4231 ZZ= 18.2297  
 Eigenvalues: 18.2070 23.2046 30.7218  
 23 H Isotropic = 24.2000 Anisotropy = 10.3039  
 XX= 30.9860 YX= -1.1150 ZX= 0.4659  
 XY= -0.3227 YY= 23.8049 ZY= -0.3146  
 XZ= 0.2640 YZ= -0.3744 ZZ= 17.8089  
 Eigenvalues: 17.7812 23.7495 31.0692

24 H Isotropic = 23.0083 Anisotropy = 10.3032  
 XX= 29.4281 YX= 1.3353 ZX= 0.3840  
 XY= 2.0337 YY= 23.4054 ZY= -0.1297  
 XZ= 0.4134 YZ= -0.0200 ZZ= 16.1914  
 Eigenvalues: 16.1772 22.9707 29.8771  
 25 H Isotropic = 24.0428 Anisotropy = 8.9755  
 XX= 26.4061 YX= -0.5741 ZX= 0.3301  
 XY= 0.4663 YY= 29.9475 ZY= -0.7167  
 XZ= -0.0891 YZ= -1.3906 ZZ= 15.7748  
 Eigenvalues: 15.6956 26.4063 30.0265  
 26 H Isotropic = 23.6184 Anisotropy = 12.4230  
 XX= 27.3126 YX= 4.5650 ZX= -0.8858  
 XY= 4.1665 YY= 27.5864 ZY= -0.1590  
 XZ= -2.8660 YZ= 0.6182 ZZ= 15.9560  
 Eigenvalues: 15.5735 23.3812 31.9003  
 27 H Isotropic = 23.7549 Anisotropy = 5.0148  
 XX= 22.7448 YX= -2.9440 ZX= 2.0638  
 XY= -3.1421 YY= 24.3804 ZY= 1.2219  
 XZ= 4.1927 YZ= 1.8557 ZZ= 24.1394  
 Eigenvalues: 18.3670 25.7996 27.0981  
 28 H Isotropic = 24.6342 Anisotropy = 3.9157  
 XX= 26.1153 YX= -2.1679 ZX= 0.9067  
 XY= -1.3636 YY= 24.1404 ZY= 1.7287  
 XZ= 1.8132 YZ= 0.8832 ZZ= 23.6469  
 Eigenvalues: 21.5211 25.1368 27.2446  
 29 H Isotropic = 25.0996 Anisotropy = 2.8873  
 XX= 26.1250 YX= -1.3022 ZX= 0.4175  
 XY= -1.2099 YY= 24.8439 ZY= 1.6387  
 XZ= 0.2218 YZ= 1.3524 ZZ= 24.3299  
 Eigenvalues: 22.7256 25.5487 27.0245  
 30 H Isotropic = 25.0389 Anisotropy = 5.1189  
 XX= 26.6307 YX= -1.1487 ZX= -0.9443  
 XY= -1.2621 YY= 24.9429 ZY= 1.4256  
 XZ= -2.5966 YZ= 2.1083 ZZ= 23.5431  
 Eigenvalues: 22.1640 24.5013 28.4515

## Isomer 9 (conformer 4)

1 C Isotropic = 57.5003 Anisotropy = 143.6012  
XX= -6.8828 YX= 16.0319 ZX= -53.3805  
XY= 17.3186 YY= 72.9268 ZY= 52.5375  
XZ= -54.9296 YZ= 53.3198 ZZ= 106.4569  
Eigenvalues: -40.6506 59.9170 153.2344

2 C Isotropic = 47.0624 Anisotropy = 113.9072  
XX= 4.8623 YX= -53.6695 ZX= -2.5247  
XY= -58.7776 YY= 33.5725 ZY= 34.3944  
XZ= -1.8356 YZ= 34.7045 ZZ= 102.7525  
Eigenvalues: -41.5689 59.7556 123.0005

3 C Isotropic = 70.5313 Anisotropy = 124.6651  
XX= 71.0432 YX= -8.4987 ZX= -17.4220  
XY= -12.9304 YY= 27.6232 ZY= 66.9226  
XZ= -14.6618 YZ= 65.8215 ZZ= 112.9275  
Eigenvalues: -8.6579 66.6104 153.6414

4 C Isotropic = 46.6106 Anisotropy = 139.1928  
XX= -8.7782 YX= 5.8891 ZX= -41.3351  
XY= 4.5482 YY= 48.4161 ZY= 51.4310  
XZ= -44.1927 YZ= 50.3743 ZZ= 100.1939  
Eigenvalues: -30.7714 31.1974 139.4058

5 C Isotropic = 60.4216 Anisotropy = 163.5892  
XX= 14.3852 YX= -33.2332 ZX= -23.5069  
XY= -32.5379 YY= 39.9831 ZY= 65.3686  
XZ= -18.8593 YZ= 65.1214 ZZ= 126.8965  
Eigenvalues: -12.6721 24.4558 169.4810

6 C Isotropic = 59.3586 Anisotropy = 175.1236  
XX= 37.3227 YX= -1.3749 ZX= -36.7296  
XY= 3.2717 YY= 28.3323 ZY= 90.3659  
XZ= -34.7227 YZ= 89.5877 ZZ= 112.4208  
Eigenvalues: -34.8242 36.7924 176.1077

7 N Isotropic = 112.5235 Anisotropy = 90.9959  
XX= 111.5067 YX= 25.2629 ZX= -30.7820  
XY= 12.1076 YY= 92.5034 ZY= 48.3049  
XZ= -31.5173 YZ= 55.2498 ZZ= 133.5605  
Eigenvalues: 41.4185 122.9646 173.1875

8 C Isotropic = 59.0656 Anisotropy = 119.1856  
XX= 2.5210 YX= -32.5694 ZX= -17.9979  
XY= -41.2387 YY= 62.2218 ZY= 32.7938  
XZ= -10.9436 YZ= 39.9992 ZZ= 112.4540  
Eigenvalues: -15.1554 53.8295 138.5227

9 C Isotropic = 75.6671 Anisotropy = 107.2035  
XX= 40.6650 YX= -36.8778 ZX= -3.8310  
XY= -32.5015 YY= 63.3115 ZY= 39.1753  
XZ= -5.9757 YZ= 40.8696 ZZ= 123.0247  
Eigenvalues: 11.4961 68.3690 147.1361

10 C Isotropic = 17.3021 Anisotropy = 125.3652  
XX= -19.0903 YX= -22.8998 ZX= 46.2192  
XY= -3.3124 YY= -1.8410 ZY= 37.1120  
XZ= 34.9924 YZ= 47.8696 ZZ= 72.8375  
Eigenvalues: -52.3213 3.3487 100.8788

11 Br Isotropic = 1893.0283 Anisotropy = 1575.6630  
XX= 2373.6543 YX= 731.2958 ZX= -113.2488  
XY= 738.5340 YY= 1939.6820 ZY= -141.4516  
XZ= -127.4722 YZ= -137.4308 ZZ= 1365.7485  
Eigenvalues: 1322.4197 1413.1949 2943.4703

12 C Isotropic = 70.6924 Anisotropy = 84.6594  
XX= 26.8658 YX= 13.1228 ZX= 30.1276

XY= 3.5712 YY= 77.8957 ZY= 18.1436  
 XZ= 34.2791 YZ= 19.3829 ZZ= 107.3156  
 Eigenvalues: 15.5157 69.4294 127.1320  
 13 C Isotropic = 28.8456 Anisotropy = 78.4785  
 XX= 67.1263 YX= -3.3942 ZX= 5.4453  
 XY= -31.3107 YY= -46.1200 ZY= 53.2388  
 XZ= 9.7328 YZ= 35.3917 ZZ= 65.5307  
 Eigenvalues: -64.2848 69.6571 81.1646  
 14 N Isotropic = -138.5593 Anisotropy = 276.7353  
 XX= -109.6747 YX= 21.4281 ZX= 35.2338  
 XY= 27.0377 YY= -296.7476 ZY= 114.9946  
 XZ= 72.8124 YZ= 90.4093 ZZ= -9.2556  
 Eigenvalues: -329.8730 -131.7358 45.9309  
 15 O Isotropic = -81.2517 Anisotropy = 262.0457  
 XX= -191.4770 YX= 26.5241 ZX= 71.1794  
 XY= 33.6770 YY= -94.0508 ZY= 52.3126  
 XZ= 93.0586 YZ= 74.0272 ZZ= 41.7726  
 Eigenvalues: -218.3486 -118.8520 93.4454  
 16 I Isotropic = 3778.9694 Anisotropy = 2052.1399  
 XX= 2898.3776 YX= -34.1690 ZX= 105.4582  
 XY= -70.7039 YY= 4965.8276 ZY= -564.5114  
 XZ= 181.9881 YZ= -523.7776 ZZ= 3472.7029  
 Eigenvalues: 2861.0928 3328.7526 5147.0627  
 17 C Isotropic = 64.3524 Anisotropy = 109.7490  
 XX= 14.1308 YX= 44.3020 ZX= -11.1658  
 XY= 44.1847 YY= 120.6350 ZY= 13.2280  
 XZ= -19.2088 YZ= 15.4202 ZZ= 58.2914  
 Eigenvalues: -7.4683 63.0071 137.5184  
 18 N Isotropic = 88.0777 Anisotropy = 126.8896  
 XX= 102.9747 YX= 21.7833 ZX= 12.1203  
 XY= 21.2473 YY= 163.5826 ZY= 13.2277  
 XZ= 23.0282 YZ= 16.7747 ZZ= -2.3243  
 Eigenvalues: -5.9637 97.5260 172.6707  
 19 C Isotropic = 65.1434 Anisotropy = 119.3121  
 XX= 4.0645 YX= 46.6039 ZX= -16.5517  
 XY= 39.8403 YY= 131.0200 ZY= 6.0304  
 XZ= -4.4008 YZ= 11.6760 ZZ= 60.3458  
 Eigenvalues: -11.4762 62.2217 144.6848  
 20 C Isotropic = 71.6915 Anisotropy = 140.2422  
 XX= 23.9535 YX= 38.6090 ZX= 34.2821  
 XY= 40.1482 YY= 152.5155 ZY= 2.6304  
 XZ= 30.5558 YZ= 7.6817 ZZ= 38.6056  
 Eigenvalues: -7.0768 56.9651 165.1864  
 21 C Isotropic = 68.5656 Anisotropy = 142.3124  
 XX= 49.8558 YX= 37.6589 ZX= -19.1256  
 XY= 41.5274 YY= 147.1394 ZY= 25.2364  
 XZ= -27.2260 YZ= 29.6506 ZZ= 8.7015  
 Eigenvalues: -12.9416 55.1977 163.4405  
 22 H Isotropic = 24.5866 Anisotropy = 12.1420  
 XX= 23.8152 YX= 3.8745 ZX= -0.1821  
 XY= 3.9328 YY= 29.5596 ZY= -4.2187  
 XZ= 0.2591 YZ= -4.1219 ZZ= 20.3851  
 Eigenvalues: 18.3081 22.7705 32.6813  
 23 H Isotropic = 24.2425 Anisotropy = 9.6904  
 XX= 30.0502 YX= 1.3240 ZX= 2.5475  
 XY= 1.6653 YY= 23.0986 ZY= -2.4046  
 XZ= 2.2436 YZ= -2.3243 ZZ= 19.5788  
 Eigenvalues: 17.7481 24.2767 30.7028

24 H Isotropic = 25.3867 Anisotropy = 12.9512  
 XX= 25.9468 YX= 5.0025 ZX= 1.6837  
 XY= 2.9603 YY= 32.0295 ZY= 0.3323  
 XZ= 1.4437 YZ= -0.5544 ZZ= 18.1838  
 Eigenvalues: 17.8201 24.3192 34.0208  
 25 H Isotropic = 23.8337 Anisotropy = 9.6593  
 XX= 25.5327 YX= -0.4689 ZX= 2.5657  
 XY= -0.3576 YY= 26.5670 ZY= -5.9622  
 XZ= 1.9669 YZ= -5.6302 ZZ= 19.4013  
 Eigenvalues: 15.8386 25.3892 30.2732  
 26 H Isotropic = 23.9231 Anisotropy = 5.9310  
 XX= 25.0921 YX= 0.6344 ZX= 0.5226  
 XY= -0.5296 YY= 25.0753 ZY= -3.6071  
 XZ= 1.8436 YZ= -4.4793 ZZ= 21.6018  
 Eigenvalues: 18.7734 25.1187 27.8771  
 27 H Isotropic = 23.6245 Anisotropy = 5.1397  
 XX= 26.8663 YX= 0.7346 ZX= -0.2140  
 XY= 1.7100 YY= 18.8158 ZY= -1.6523  
 XZ= 0.7542 YZ= -2.8417 ZZ= 25.1914  
 Eigenvalues: 17.9295 25.8931 27.0510  
 28 H Isotropic = 24.5591 Anisotropy = 3.8702  
 XX= 26.5556 YX= -1.1430 ZX= -0.7459  
 XY= -1.8688 YY= 22.9506 ZY= -1.5817  
 XZ= 0.4590 YZ= -1.0440 ZZ= 24.1710  
 Eigenvalues: 21.7260 24.8120 27.1393  
 29 H Isotropic = 25.3177 Anisotropy = 2.8444  
 XX= 26.1287 YX= -1.2507 ZX= -0.8516  
 XY= -1.2805 YY= 24.3848 ZY= -0.6045  
 XZ= -1.0739 YZ= 0.5911 ZZ= 25.4396  
 Eigenvalues: 23.5929 25.1462 27.2139  
 30 H Isotropic = 25.5013 Anisotropy = 4.6268  
 XX= 25.1804 YX= -1.2973 ZX= -1.1151  
 XY= -1.1412 YY= 25.4920 ZY= 0.4631  
 XZ= -2.5728 YZ= 2.5364 ZZ= 25.8316  
 Eigenvalues: 23.6325 24.2857 28.5859

## Isomer 10 (conformer 1)

1 C Isotropic = 57.7786 Anisotropy = 146.0034  
XX= 18.2335 YX= 38.9359 ZX= -48.4790  
XY= 42.8560 YY= 19.4199 ZY= 30.0678  
XZ= -49.2143 YZ= 30.5549 ZZ= 135.6823  
Eigenvalues: -40.1202 58.3417 155.1142

2 C Isotropic = 46.9195 Anisotropy = 114.1869  
XX= -7.3242 YX= -41.1676 ZX= -36.6524  
XY= -45.5672 YY= 37.0457 ZY= -3.9584  
XZ= -38.5160 YZ= -2.7295 ZZ= 111.0369  
Eigenvalues: -41.4790 59.1933 123.0441

3 C Isotropic = 69.5497 Anisotropy = 126.3223  
XX= 69.2878 YX= -15.2603 ZX= -25.5801  
XY= -21.3778 YY= -4.4496 ZY= 12.2562  
XZ= -25.1841 YZ= 14.6270 ZZ= 143.8111  
Eigenvalues: -9.1196 64.0042 153.7646

4 C Isotropic = 46.9150 Anisotropy = 143.9260  
XX= 10.3122 YX= 22.7910 ZX= -46.7144  
XY= 22.5994 YY= 7.0744 ZY= 23.0294  
XZ= -50.2145 YZ= 24.2785 ZZ= 123.3583  
Eigenvalues: -31.1235 29.0027 142.8657

5 C Isotropic = 58.4638 Anisotropy = 167.0684  
XX= 19.1029 YX= -16.2154 ZX= -48.1837  
XY= -18.7344 YY= 4.7632 ZY= 12.5156  
XZ= -48.6442 YZ= 18.7495 ZZ= 151.5253  
Eigenvalues: -8.9064 14.4550 169.8427

6 C Isotropic = 61.2860 Anisotropy = 174.0623  
XX= 53.4465 YX= -0.4110 ZX= -39.3309  
XY= 0.4683 YY= -33.1042 ZY= 24.5951  
XZ= -33.9412 YZ= 25.4835 ZZ= 163.5155  
Eigenvalues: -36.4947 43.0251 177.3275

7 N Isotropic = 115.3277 Anisotropy = 89.1285  
XX= 128.2835 YX= 19.4948 ZX= -19.0575  
XY= 13.2094 YY= 53.9736 ZY= 18.4190  
XZ= -22.7342 YZ= 23.6156 ZZ= 163.7262  
Eigenvalues: 45.1820 126.0545 174.7467

8 C Isotropic = 57.8546 Anisotropy = 119.5755  
XX= 0.3783 YX= -19.0338 ZX= -45.7949  
XY= -27.6535 YY= 51.3187 ZY= -1.1367  
XZ= -44.3135 YZ= 3.1021 ZZ= 121.8668  
Eigenvalues: -21.1392 57.1314 137.5716

9 C Isotropic = 76.2906 Anisotropy = 111.6057  
XX= 43.1671 YX= -35.4145 ZX= -32.2447  
XY= -29.2764 YY= 46.1713 ZY= 1.8759  
XZ= -32.8006 YZ= 0.9653 ZZ= 139.5335  
Eigenvalues: 8.1691 70.0084 150.6944

10 C Isotropic = 76.0403 Anisotropy = 79.9368  
XX= 73.9644 YX= -34.5066 ZX= 28.7038  
XY= -25.4818 YY= 44.9121 ZY= -9.0998  
XZ= 27.6535 YZ= 0.0478 ZZ= 109.2443  
Eigenvalues: 24.4527 74.3366 129.3315

11 Br Isotropic = 1886.6607 Anisotropy = 1592.7255  
XX= 2581.6038 YX= 567.7760 ZX= 338.2341  
XY= 583.3807 YY= 1685.5826 ZY= 141.8345  
XZ= 335.3825 YZ= 140.8830 ZZ= 1392.7956  
Eigenvalues: 1303.2019 1408.3025 2948.4777

12 C Isotropic = 21.5512 Anisotropy = 124.8803  
XX= 6.6601 YX= -16.2550 ZX= 70.9524

XY= -34.1095 YY= 9.7673 ZY= -6.1993  
 XZ= 66.9108 YZ= -12.2118 ZZ= 48.2260  
 Eigenvalues: -48.5040 8.3528 104.8047  
 13 O Isotropic = -70.5716 Anisotropy = 259.7783  
 XX= -65.1257 YX= -79.6226 ZX= 107.5145  
 XY= -76.7138 YY= -156.1600 ZY= -28.6202  
 XZ= 103.5270 YZ= -27.0241 ZZ= 9.5710  
 Eigenvalues: -206.2863 -108.0423 102.6140  
 14 N Isotropic = -134.3799 Anisotropy = 268.8979  
 XX= -130.0190 YX= 20.9664 ZX= 143.6933  
 XY= 40.5635 YY= -161.1777 ZY= -99.3669  
 XZ= 155.9134 YZ= -104.6378 ZZ= -111.9428  
 Eigenvalues: -325.5519 -122.4731 44.8854  
 15 C Isotropic = 27.5927 Anisotropy = 74.4152  
 XX= 21.4401 YX= 24.6853 ZX= 52.6851  
 XY= 41.4690 YY= 51.9594 ZY= -44.0595  
 XZ= 68.4175 YZ= -20.9470 ZZ= 9.3786  
 Eigenvalues: -63.9417 69.5171 77.2028  
 16 C Isotropic = 62.4457 Anisotropy = 101.8310  
 XX= 55.3889 YX= -22.2784 ZX= 58.6208  
 XY= -25.1852 YY= 48.7562 ZY= 7.4474  
 XZ= 57.7789 YZ= 5.4110 ZZ= 83.1918  
 Eigenvalues: -0.9775 57.9815 130.3330  
 17 N Isotropic = 94.9888 Anisotropy = 136.6154  
 XX= 118.2663 YX= -22.7855 ZX= 49.2510  
 XY= -10.7636 YY= 13.9376 ZY= -19.8019  
 XZ= 39.1681 YZ= -13.1611 ZZ= 152.7625  
 Eigenvalues: 10.5823 88.3184 186.0657  
 18 C Isotropic = 62.4926 Anisotropy = 119.7182  
 XX= 46.8467 YX= -20.4156 ZX= 74.9223  
 XY= -11.6811 YY= 59.9951 ZY= -4.1487  
 XZ= 75.7979 YZ= 3.1692 ZZ= 80.6360  
 Eigenvalues: -15.4866 60.6596 142.3047  
 19 C Isotropic = 71.8237 Anisotropy = 137.5738  
 XX= 79.6649 YX= 13.7116 ZX= 71.4148  
 XY= 12.4144 YY= 36.4208 ZY= -32.9611  
 XZ= 71.3129 YZ= -30.7245 ZZ= 99.3856  
 Eigenvalues: -5.7486 57.6802 163.5396  
 20 C Isotropic = 70.5481 Anisotropy = 142.5882  
 XX= 86.8163 YX= -29.6680 ZX= 60.4736  
 XY= -29.5285 YY= 7.6366 ZY= -2.9209  
 XZ= 57.9056 YZ= -0.7827 ZZ= 117.1915  
 Eigenvalues: -5.3505 51.3879 165.6070  
 21 I Isotropic = 3789.3330 Anisotropy = 2011.4485  
 XX= 3737.5657 YX= -777.0882 ZX= -569.9488  
 XY= -685.7629 YY= 3515.0586 ZY= 749.0077  
 XZ= -575.6665 YZ= 608.3814 ZZ= 4115.3746  
 Eigenvalues: 2859.6567 3378.0436 5130.2987  
 22 H Isotropic = 24.3067 Anisotropy = 9.9596  
 XX= 25.3944 YX= 4.1255 ZX= 2.1962  
 XY= 3.2589 YY= 28.1284 ZY= 0.0860  
 XZ= 2.3870 YZ= 0.7885 ZZ= 19.3974  
 Eigenvalues: 18.5466 23.4271 30.9465  
 23 H Isotropic = 24.0893 Anisotropy = 9.8524  
 XX= 29.4225 YX= -0.6343 ZX= 3.7700  
 XY= -0.2514 YY= 23.9588 ZY= -0.7871  
 XZ= 3.6398 YZ= -0.7042 ZZ= 18.8865  
 Eigenvalues: 17.6610 23.9493 30.6576



24 H Isotropic = 24.3135 Anisotropy = 9.5540  
 XX= 28.4733 YX= 1.7294 ZX= 4.2480  
 XY= 0.6206 YY= 22.6147 ZY= 0.1430  
 XZ= 3.8691 YZ= 1.9399 ZZ= 21.8525  
 Eigenvalues: 19.8506 22.4071 30.6828  
 25 H Isotropic = 23.7795 Anisotropy = 9.5063  
 XX= 24.6133 YX= -0.2629 ZX= 2.3927  
 XY= 0.4981 YY= 29.8673 ZY= -1.8335  
 XZ= 2.0715 YZ= -1.7569 ZZ= 16.8578  
 Eigenvalues: 16.0359 25.1855 30.1170  
 26 H Isotropic = 24.3146 Anisotropy = 6.3251  
 XX= 24.2665 YX= 1.2423 ZX= -0.4864  
 XY= -0.2277 YY= 27.1406 ZY= -2.8178  
 XZ= 0.3650 YZ= -3.2685 ZZ= 21.5366  
 Eigenvalues: 20.1965 24.2159 28.5314  
 27 H Isotropic = 23.9872 Anisotropy = 15.1310  
 XX= 20.1421 YX= -1.8618 ZX= -6.4604  
 XY= 0.2326 YY= 27.2991 ZY= 4.3514  
 XZ= -4.1296 YZ= 9.2758 ZZ= 24.5204  
 Eigenvalues: 15.5042 22.3828 34.0746  
 28 H Isotropic = 25.0883 Anisotropy = 5.2817  
 XX= 24.1713 YX= -0.5483 ZX= -2.9348  
 XY= 0.6304 YY= 25.8041 ZY= 1.0102  
 XZ= -2.9602 YZ= 2.9540 ZZ= 25.2896  
 Eigenvalues: 21.3237 25.3318 28.6094  
 29 H Isotropic = 25.2199 Anisotropy = 2.9737  
 XX= 24.7648 YX= -0.0643 ZX= -1.9731  
 XY= 0.5300 YY= 26.3834 ZY= 0.5955  
 XZ= -1.8986 YZ= 1.6915 ZZ= 24.5114  
 Eigenvalues: 22.4417 26.0156 27.2023  
 30 H Isotropic = 24.3343 Anisotropy = 5.0526  
 XX= 24.3596 YX= -0.3903 ZX= -2.8283  
 XY= -0.5364 YY= 25.6148 ZY= 1.8710  
 XZ= -2.5840 YZ= 1.8629 ZZ= 23.0285  
 Eigenvalues: 20.6041 24.6961 27.7027

## Isomer 10 (conformer 2)

1 C Isotropic = 58.4091 Anisotropy = 144.4095

XX= 20.4834 YX= 36.8302 ZX= -51.4550

XY= 41.0043 YY= 22.8775 ZY= 33.2268

XZ= -52.3523 YZ= 33.2285 ZZ= 131.8663

Eigenvalues: -38.8157 59.3609 154.6821

2 C Isotropic = 47.5130 Anisotropy = 112.2210

XX= -5.1221 YX= -42.7389 ZX= -37.8016

XY= -46.9559 YY= 38.4577 ZY= -3.7840

XZ= -38.9675 YZ= -2.5958 ZZ= 109.2033

Eigenvalues: -41.1390 61.3509 122.3270

3 C Isotropic = 69.6149 Anisotropy = 126.0623

XX= 71.1333 YX= -16.2703 ZX= -26.4339

XY= -21.8326 YY= -4.1886 ZY= 15.2775

XZ= -26.0024 YZ= 18.4794 ZZ= 141.8999

Eigenvalues: -9.4894 64.6775 153.6564

4 C Isotropic = 46.8398 Anisotropy = 143.9281

XX= 11.7057 YX= 21.0724 ZX= -49.5935

XY= 21.0016 YY= 8.4486 ZY= 26.1481

XZ= -52.5933 YZ= 26.5273 ZZ= 120.3652

Eigenvalues: -31.1163 28.8439 142.7918

5 C Isotropic = 58.5885 Anisotropy = 167.6229

XX= 19.9626 YX= -17.5112 ZX= -50.9666

XY= -21.2293 YY= 5.4852 ZY= 15.5086

XZ= -49.3205 YZ= 17.8565 ZZ= 150.3178

Eigenvalues: -10.1379 15.5663 170.3371

6 C Isotropic = 60.7606 Anisotropy = 173.4690

XX= 54.5729 YX= -1.4840 ZX= -41.6197

XY= -1.3810 YY= -31.9452 ZY= 29.8959

XZ= -36.2897 YZ= 29.0310 ZZ= 159.6540

Eigenvalues: -36.6021 42.4773 176.4066

7 N Isotropic = 116.2626 Anisotropy = 87.1235

XX= 129.9576 YX= 18.5617 ZX= -19.5955

XY= 12.3296 YY= 56.5272 ZY= 20.8228

XZ= -21.9325 YZ= 25.9908 ZZ= 162.3030

Eigenvalues: 46.9074 127.5355 174.3449

8 C Isotropic = 58.7535 Anisotropy = 117.8435

XX= 3.0617 YX= -19.5740 ZX= -46.6436

XY= -29.4541 YY= 52.1078 ZY= -0.1468

XZ= -42.8299 YZ= 4.4361 ZZ= 121.0910

Eigenvalues: -19.1766 58.1211 137.3158

9 C Isotropic = 75.8490 Anisotropy = 112.2451

XX= 44.4331 YX= -36.7515 ZX= -32.6338

XY= -30.9262 YY= 44.4481 ZY= 4.1146

XZ= -33.3503 YZ= 0.8554 ZZ= 138.6656

Eigenvalues: 6.8188 70.0490 150.6791

10 C Isotropic = 74.0934 Anisotropy = 81.5985

XX= 71.3063 YX= -33.3939 ZX= 31.4233

XY= -26.2754 YY= 44.2430 ZY= -7.7843

XZ= 29.8022 YZ= 1.3023 ZZ= 106.7310

Eigenvalues: 22.3923 71.3955 128.4925

11 Br Isotropic = 1896.9045 Anisotropy = 1580.7463

XX= 2567.8450 YX= 568.6165 ZX= 348.0435

XY= 587.3599 YY= 1709.1747 ZY= 148.3898

XZ= 344.9933 YZ= 149.3612 ZZ= 1413.6939

Eigenvalues: 1316.7191 1423.2591 2950.7354

12 C Isotropic = 22.5414 Anisotropy = 123.9623

XX= 8.2635 YX= -14.4809 ZX= 71.0352

XY= -34.3742 YY= 10.8200 ZY= -5.5843  
 XZ= 65.4781 YZ= -15.0026 ZZ= 48.5407  
 Eigenvalues: -46.1293 8.5706 105.1830  
 13 O Isotropic = -59.3343 Anisotropy = 253.9822  
 XX= -50.5463 YX= -78.4798 ZX= 101.2402  
 XY= -79.1866 YY= -147.1928 ZY= -27.1735  
 XZ= 100.3209 YZ= -27.4012 ZZ= 19.7360  
 Eigenvalues: -195.3555 -92.6347 109.9872  
 14 N Isotropic = -130.5772 Anisotropy = 259.7023  
 XX= -123.3449 YX= 25.1259 ZX= 138.0213  
 XY= 39.1996 YY= -160.9567 ZY= -97.7183  
 XZ= 148.5933 YZ= -101.6291 ZZ= -107.4300  
 Eigenvalues: -316.0386 -118.2507 42.5577  
 15 C Isotropic = 26.1198 Anisotropy = 75.1599  
 XX= 22.3799 YX= 25.6313 ZX= 52.0869  
 XY= 41.1101 YY= 46.6147 ZY= -46.4159  
 XZ= 67.3882 YZ= -23.0426 ZZ= 9.3649  
 Eigenvalues: -64.9840 67.1171 76.2264  
 16 C Isotropic = 63.1574 Anisotropy = 103.0511  
 XX= 77.1225 YX= 0.2408 ZX= 45.9422  
 XY= 8.9621 YY= 28.5300 ZY= -34.7359  
 XZ= 48.4578 YZ= -28.1632 ZZ= 83.8196  
 Eigenvalues: 4.1341 53.4799 131.8581  
 17 N Isotropic = 99.0600 Anisotropy = 126.1939  
 XX= 113.3400 YX= -46.6423 ZX= 46.2159  
 XY= -51.1042 YY= 37.6635 ZY= 3.7523  
 XZ= 44.2436 YZ= 0.8896 ZZ= 146.1764  
 Eigenvalues: 9.7925 104.1982 183.1892  
 18 C Isotropic = 62.9802 Anisotropy = 120.1331  
 XX= 71.2161 YX= 14.3613 ZX= 64.2832  
 XY= 9.1705 YY= 39.7421 ZY= -35.1772  
 XZ= 64.9332 YZ= -39.2376 ZZ= 77.9824  
 Eigenvalues: -13.1591 59.0308 143.0689  
 19 C Isotropic = 70.9689 Anisotropy = 136.3564  
 XX= 59.8701 YX= -23.7909 ZX= 79.1915  
 XY= -20.3509 YY= 60.2209 ZY= -9.6536  
 XZ= 80.0069 YZ= -7.7636 ZZ= 92.8156  
 Eigenvalues: -7.0301 58.0636 161.8732  
 20 C Isotropic = 68.8568 Anisotropy = 145.8400  
 XX= 85.2866 YX= -25.4527 ZX= 59.6208  
 XY= -20.9396 YY= 3.4383 ZY= -25.0343  
 XZ= 52.2734 YZ= -19.8228 ZZ= 117.8456  
 Eigenvalues: -3.3388 43.8258 166.0835  
 21 I Isotropic = 3786.6412 Anisotropy = 2017.6949  
 XX= 3709.8100 YX= -798.3762 ZX= -574.0259  
 XY= -690.6544 YY= 3563.1629 ZY= 734.9348  
 XZ= -558.7298 YZ= 637.3734 ZZ= 4086.9506  
 Eigenvalues: 2865.3212 3362.8312 5131.7711  
 22 H Isotropic = 24.3216 Anisotropy = 9.8599  
 XX= 25.3034 YX= 4.0926 ZX= 2.1000  
 XY= 3.2320 YY= 28.2198 ZY= -0.1014  
 XZ= 2.3636 YZ= 0.5947 ZZ= 19.4415  
 Eigenvalues: 18.5781 23.4917 30.8949  
 23 H Isotropic = 24.0938 Anisotropy = 9.9380  
 XX= 29.3508 YX= -0.5299 ZX= 3.9663  
 XY= -0.1355 YY= 23.8598 ZY= -0.8906  
 XZ= 3.8494 YZ= -0.8456 ZZ= 19.0708  
 Eigenvalues: 17.6707 23.8916 30.7191

24 H Isotropic = 24.3626 Anisotropy = 9.5311  
 XX= 28.5796 YX= 1.8045 ZX= 4.0391  
 XY= 0.6449 YY= 22.7719 ZY= 0.0298  
 XZ= 4.0097 YZ= 1.7305 ZZ= 21.7364  
 Eigenvalues: 19.8458 22.5254 30.7167

25 H Isotropic = 23.8386 Anisotropy = 9.5230  
 XX= 24.5959 YX= -0.2102 ZX= 2.4781  
 XY= 0.6158 YY= 29.8550 ZY= -2.1081  
 XZ= 2.1531 YZ= -2.0361 ZZ= 17.0650  
 Eigenvalues: 16.1043 25.2243 30.1873

26 H Isotropic = 24.4177 Anisotropy = 6.1409  
 XX= 24.3275 YX= 1.1819 ZX= -0.4105  
 XY= -0.1936 YY= 27.0423 ZY= -2.8866  
 XZ= 0.6118 YZ= -3.2524 ZZ= 21.8835  
 Eigenvalues: 20.4303 24.3113 28.5117

27 H Isotropic = 22.9710 Anisotropy = 7.1999  
 XX= 22.5999 YX= 2.3083 ZX= -5.1231  
 XY= 2.3434 YY= 26.5706 ZY= 1.4138  
 XZ= -4.9049 YZ= 1.6993 ZZ= 19.7424  
 Eigenvalues: 15.3315 25.8105 27.7709

28 H Isotropic = 24.7356 Anisotropy = 3.8870  
 XX= 24.2978 YX= 0.5998 ZX= -2.3526  
 XY= -0.1251 YY= 26.1672 ZY= 1.7076  
 XZ= -2.4245 YZ= 1.4537 ZZ= 23.7419  
 Eigenvalues: 21.2404 25.6395 27.3269

29 H Isotropic = 25.4558 Anisotropy = 4.2945  
 XX= 24.6875 YX= 0.0980 ZX= -1.9939  
 XY= 0.0405 YY= 26.2789 ZY= 1.5897  
 XZ= -2.2766 YZ= 2.1734 ZZ= 25.4010  
 Eigenvalues: 22.4143 25.6343 28.3188

30 H Isotropic = 25.6201 Anisotropy = 11.2476  
 XX= 24.0110 YX= -1.5181 ZX= -4.8139  
 XY= 0.3444 YY= 24.6812 ZY= 2.7577  
 XZ= -2.7969 YZ= 7.3775 ZZ= 28.1680  
 Eigenvalues: 20.0494 23.6923 33.1185

### Isomer 10 (conformer 3)

1 C Isotropic = 58.5232 Anisotropy = 144.2261

XX= 20.9313 YX= 31.4356 ZX= -55.1555

XY= 35.2696 YY= 31.6849 ZY= 45.2592

XZ= -56.2999 YZ= 44.9759 ZZ= 122.9534

Eigenvalues: -39.1727 60.0684 154.6740

2 C Isotropic = 47.1843 Anisotropy = 112.4164

XX= -5.5131 YX= -46.4659 ZX= -32.3740

XY= -50.5237 YY= 38.0685 ZY= 4.7451

XZ= -33.5215 YZ= 5.0707 ZZ= 108.9975

Eigenvalues: -41.1739 60.5983 122.1286

3 C Isotropic = 70.2802 Anisotropy = 125.0017

XX= 71.0755 YX= -18.9900 ZX= -23.6511

XY= -24.8638 YY= 2.0476 ZY= 30.1205

XZ= -22.2955 YZ= 32.1041 ZZ= 137.7175

Eigenvalues: -8.4022 65.6281 153.6147

4 C Isotropic = 46.9340 Anisotropy = 144.4021

XX= 9.2526 YX= 16.2693 ZX= -50.1711

XY= 15.9450 YY= 16.0501 ZY= 37.4982

XZ= -52.4307 YZ= 38.3569 ZZ= 115.4995

Eigenvalues: -31.4743 29.0743 143.2021

5 C Isotropic = 56.7090 Anisotropy = 169.9060

XX= 15.3972 YX= -23.0031 ZX= -47.8193

XY= -25.5713 YY= 10.1184 ZY= 34.3321

XZ= -45.7241 YZ= 34.6440 ZZ= 144.6115

Eigenvalues: -12.0218 12.1692 169.9797

6 C Isotropic = 59.8072 Anisotropy = 174.4628

XX= 53.4691 YX= -6.7832 ZX= -39.8951

XY= -5.5612 YY= -23.6606 ZY= 53.6080

XZ= -34.6184 YZ= 52.7128 ZZ= 149.6131

Eigenvalues: -38.8749 42.1808 176.1157

7 N Isotropic = 116.9153 Anisotropy = 85.5468

XX= 129.8484 YX= 15.4040 ZX= -19.9686

XY= 8.7936 YY= 64.2341 ZY= 31.3891

XZ= -21.3112 YZ= 36.8925 ZZ= 156.6634

Eigenvalues: 48.9053 127.8941 173.9465

8 C Isotropic = 59.3968 Anisotropy = 117.4248

XX= -0.2936 YX= -29.7328 ZX= -39.3375

XY= -32.5805 YY= 57.8024 ZY= 9.8117

XZ= -43.4585 YZ= 8.0108 ZZ= 120.6816

Eigenvalues: -22.5046 63.0150 137.6800

9 C Isotropic = 75.6962 Anisotropy = 111.8048

XX= 44.1882 YX= -43.6635 ZX= -26.0045

XY= -35.7215 YY= 45.2399 ZY= 15.8762

XZ= -25.2442 YZ= 12.9036 ZZ= 137.6606

Eigenvalues: 4.4814 72.3746 150.2327

10 C Isotropic = 73.5194 Anisotropy = 80.3346

XX= 86.3180 YX= -12.4570 ZX= 28.7147

XY= -20.8232 YY= 27.7107 ZY= -11.4036

XZ= 19.5642 YZ= -16.9899 ZZ= 106.5297

Eigenvalues: 22.5359 70.9466 127.0759

11 Br Isotropic = 1895.8608 Anisotropy = 1583.6436

XX= 2557.8495 YX= 599.5388 ZX= 276.9791

XY= 633.7629 YY= 1734.8136 ZY= 114.1468

XZ= 304.7534 YZ= 135.8621 ZZ= 1394.9193

Eigenvalues: 1322.5297 1413.4295 2951.6232

12 C Isotropic = 22.4919 Anisotropy = 122.2113

XX= 40.7486 YX= -12.6658 ZX= 49.1794

XY= 9.8794 YY= -20.7435 ZY= -45.7411  
 XZ= 54.8701 YZ= -34.5691 ZZ= 47.4706  
 Eigenvalues: -45.7350 9.2446 103.9661  
 13 O Isotropic = -60.1218 Anisotropy = 253.3051  
 XX= -18.1292 YX= -54.5444 ZX= 89.1816  
 XY= -53.5564 YY= -177.5412 ZY= -42.5550  
 XZ= 96.9734 YZ= -40.9187 ZZ= 15.3051  
 Eigenvalues: -195.1431 -93.9704 108.7483  
 14 N Isotropic = -130.9279 Anisotropy = 260.6930  
 XX= -161.5185 YX= 2.7432 ZX= 166.1019  
 XY= -6.4644 YY= -116.1805 ZY= -42.4269  
 XZ= 177.6387 YZ= -46.8547 ZZ= -115.0848  
 Eigenvalues: -315.7244 -119.9268 42.8674  
 15 C Isotropic = 26.0131 Anisotropy = 82.3887  
 XX= 7.7257 YX= 30.4539 ZX= 70.2238  
 XY= 10.6372 YY= 56.2346 ZY= -17.6499  
 XZ= 66.4717 YZ= -35.9215 ZZ= 14.0790  
 Eigenvalues: -66.5918 63.6921 80.9389  
 16 C Isotropic = 62.3084 Anisotropy = 102.2928  
 XX= 52.5476 YX= -14.0419 ZX= 60.2249  
 XY= -22.5996 YY= 56.3606 ZY= -7.0837  
 XZ= 57.9451 YZ= -11.5367 ZZ= 78.0169  
 Eigenvalues: 3.4290 52.9926 130.5036  
 17 N Isotropic = 97.8581 Anisotropy = 127.6998  
 XX= 122.7301 YX= -41.8726 ZX= 36.0665  
 XY= -39.3523 YY= 23.8323 ZY= -22.6608  
 XZ= 34.7440 YZ= -19.0655 ZZ= 147.0119  
 Eigenvalues: 8.8190 101.7640 182.9913  
 18 C Isotropic = 62.8583 Anisotropy = 120.1646  
 XX= 52.3488 YX= -11.6406 ZX= 71.6743  
 XY= -6.5200 YY= 64.2324 ZY= -22.4103  
 XZ= 76.8456 YZ= -18.8369 ZZ= 71.9938  
 Eigenvalues: -13.3496 58.9565 142.9681  
 19 C Isotropic = 71.6277 Anisotropy = 135.3746  
 XX= 90.9658 YX= 4.2355 ZX= 61.3176  
 XY= -0.2581 YY= 29.4456 ZY= -46.3813  
 XZ= 60.5137 YZ= -46.3846 ZZ= 94.4717  
 Eigenvalues: -6.5859 59.5916 161.8774  
 20 C Isotropic = 72.1536 Anisotropy = 141.0314  
 XX= 72.1220 YX= -32.5354 ZX= 68.3182  
 XY= -42.5138 YY= 24.5841 ZY= -12.8361  
 XZ= 51.4338 YZ= -4.2276 ZZ= 119.7548  
 Eigenvalues: -1.3226 51.6089 166.1746  
 21 I Isotropic = 3763.7325 Anisotropy = 2020.2439  
 XX= 4282.1315 YX= -297.1616 ZX= -852.0197  
 XY= -330.0999 YY= 2849.7759 ZY= 89.3542  
 XZ= -857.9561 YZ= 31.4764 ZZ= 4159.2902  
 Eigenvalues: 2769.6673 3410.9685 5110.5618  
 22 H Isotropic = 24.2028 Anisotropy = 10.0944  
 XX= 25.1417 YX= 4.2912 ZX= 1.6957  
 XY= 3.6873 YY= 28.1435 ZY= -0.8339  
 XZ= 2.2838 YZ= -0.5745 ZZ= 19.3232  
 Eigenvalues: 18.2858 23.3903 30.9324  
 23 H Isotropic = 24.0631 Anisotropy = 9.7417  
 XX= 29.1455 YX= -0.2170 ZX= 3.9978  
 XY= 0.2107 YY= 23.7796 ZY= -1.1866  
 XZ= 3.9029 YZ= -1.3578 ZZ= 19.2642  
 Eigenvalues: 17.6440 23.9876 30.5575

24 H Isotropic = 23.9680 Anisotropy = 10.1937  
 XX= 27.5217 YX= 1.8748 ZX= 3.9601  
 XY= 1.3995 YY= 22.1535 ZY= 1.3994  
 XZ= 5.2305 YZ= 1.8936 ZZ= 22.2289  
 Eigenvalues: 19.4110 21.7292 30.7639

25 H Isotropic = 23.7886 Anisotropy = 10.0386  
 XX= 24.2930 YX= -0.5567 ZX= 2.6805  
 XY= 0.5519 YY= 29.6710 ZY= -2.9721  
 XZ= 2.0080 YZ= -3.3110 ZZ= 17.4018  
 Eigenvalues: 16.0155 24.8693 30.4810

26 H Isotropic = 24.2830 Anisotropy = 5.6110  
 XX= 24.1932 YX= 0.3729 ZX= 0.2320  
 XY= -0.5236 YY= 27.2601 ZY= -2.0532  
 XZ= 0.3936 YZ= -2.4209 ZZ= 21.3958  
 Eigenvalues: 20.6191 24.2062 28.0237

27 H Isotropic = 23.0251 Anisotropy = 7.0887  
 XX= 22.2080 YX= 2.0574 ZX= -4.6857  
 XY= 1.9572 YY= 26.9641 ZY= 2.2670  
 XZ= -4.9328 YZ= 2.1542 ZZ= 19.9030  
 Eigenvalues: 15.3461 25.9782 27.7509

28 H Isotropic = 24.6856 Anisotropy = 3.7510  
 XX= 25.0147 YX= 0.3497 ZX= -2.8612  
 XY= 1.0219 YY= 25.4089 ZY= 0.5472  
 XZ= -2.6874 YZ= 0.9727 ZZ= 23.6331  
 Eigenvalues: 21.2161 25.6543 27.1862

29 H Isotropic = 25.3603 Anisotropy = 3.7204  
 XX= 25.5612 YX= 0.5333 ZX= -2.2486  
 XY= 0.5566 YY= 25.6854 ZY= 0.5795  
 XZ= -2.9829 YZ= 0.8633 ZZ= 24.8343  
 Eigenvalues: 22.3154 25.9249 27.8406

30 H Isotropic = 24.7633 Anisotropy = 11.7749  
 XX= 26.3025 YX= -0.9852 ZX= -5.8514  
 XY= -1.5595 YY= 23.6705 ZY= 1.7368  
 XZ= -8.1678 YZ= -0.3516 ZZ= 24.3170  
 Eigenvalues: 18.2120 23.4647 32.6133

## Isomer 10 (conformer 4)

1 C Isotropic = 58.2957 Anisotropy = 144.0363  
XX= 72.5426 YX= 12.5053 ZX= 75.1629  
XY= 15.6166 YY= 32.3347 ZY= -55.0402  
XZ= 76.3421 YZ= -53.2415 ZZ= 70.0099  
Eigenvalues: -39.3045 59.8717 154.3199

2 C Isotropic = 47.2413 Anisotropy = 112.9440  
XX= 32.5553 YX= -45.6691 ZX= 62.9541  
XY= -49.2575 YY= 37.9446 ZY= 14.3341  
XZ= 63.5974 YZ= 12.1184 ZZ= 71.2241  
Eigenvalues: -41.5735 60.7602 122.5373

3 C Isotropic = 69.9535 Anisotropy = 124.7652  
XX= 95.8242 YX= -29.1441 ZX= 40.0390  
XY= -34.2514 YY= 1.8958 ZY= -19.7027  
XZ= 38.7046 YZ= -23.0840 ZZ= 112.1405  
Eigenvalues: -8.5703 65.3005 153.1303

4 C Isotropic = 46.7100 Anisotropy = 144.2674  
XX= 58.0522 YX= 0.6531 ZX= 72.7740  
XY= 0.8328 YY= 16.5812 ZY= -41.2169  
XZ= 74.7121 YZ= -42.0178 ZZ= 65.4966  
Eigenvalues: -31.8351 29.0768 142.8882

5 C Isotropic = 56.4594 Anisotropy = 169.5406  
XX= 63.8077 YX= -35.3491 ZX= 78.8211  
XY= -36.7045 YY= 10.6994 ZY= -23.0206  
XZ= 76.6446 YZ= -25.0700 ZZ= 94.8711  
Eigenvalues: -12.2559 12.1477 169.4865

6 C Isotropic = 60.3371 Anisotropy = 174.1588  
XX= 92.6642 YX= -26.6811 ZX= 62.1104  
XY= -24.9264 YY= -22.2813 ZY= -48.3549  
XZ= 57.4372 YZ= -47.7885 ZZ= 110.6284  
Eigenvalues: -38.2032 42.7715 176.4430

7 N Isotropic = 116.9351 Anisotropy = 85.3476  
XX= 147.7776 YX= 1.3509 ZX= 23.4516  
XY= -3.0542 YY= 64.5561 ZY= -33.3831  
XZ= 24.9019 YZ= -40.2020 ZZ= 138.4717  
Eigenvalues: 48.6088 128.3630 173.8336

8 C Isotropic = 59.6020 Anisotropy = 117.1605  
XX= 43.5963 YX= -31.0532 ZX= 69.2514  
XY= -34.7336 YY= 58.0973 ZY= 3.0420  
XZ= 72.8160 YZ= 2.9957 ZZ= 77.1124  
Eigenvalues: -22.3920 63.4889 137.7090

9 C Isotropic = 75.4627 Anisotropy = 112.5535  
XX= 72.5562 YX= -46.8585 ZX= 51.1032  
XY= -39.1957 YY= 45.7978 ZY= -2.5126  
XZ= 50.6661 YZ= 3.9833 ZZ= 108.0341  
Eigenvalues: 3.4046 72.4852 150.4983

10 C Isotropic = 73.8897 Anisotropy = 80.1319  
XX= 73.9405 YX= -5.4646 ZX= -16.2717  
XY= -15.5291 YY= 27.8346 ZY= 18.0803  
XZ= -7.3707 YZ= 20.5102 ZZ= 119.8942  
Eigenvalues: 22.6720 71.6863 127.3110

11 Br Isotropic = 1897.0446 Anisotropy = 1575.1774  
XX= 2209.9171 YX= 518.3647 ZX= -600.3242  
XY= 544.4621 YY= 1739.2843 ZY= -333.3890  
XZ= -606.0758 YZ= -329.3918 ZZ= 1741.9324  
Eigenvalues: 1322.7161 1421.2548 2947.1628

12 C Isotropic = 22.3639 Anisotropy = 123.1391  
XX= 7.5688 YX= -0.0165 ZX= -34.6976



XY= 24.2270 YY= -21.4307 ZY= 39.8522  
 XZ= -39.5672 YZ= 37.3445 ZZ= 80.9535  
 Eigenvalues: -45.9876 8.6226 104.4566  
 13 O Isotropic = -60.0754 Anisotropy = 252.6535  
 XX= -73.9322 YX= -37.5695 ZX= -55.6894  
 XY= -34.9601 YY= -177.4438 ZY= 58.0174  
 XZ= -63.9825 YZ= 58.1005 ZZ= 71.1498  
 Eigenvalues: -195.1076 -93.4789 108.3602  
 14 N Isotropic = -130.9312 Anisotropy = 260.4593  
 XX= -268.1888 YX= 18.0709 ZX= -109.7322  
 XY= 8.9395 YY= -115.6312 ZY= 42.1198  
 XZ= -119.4050 YZ= 45.1045 ZZ= -8.9735  
 Eigenvalues: -315.5828 -119.9191 42.7084  
 15 C Isotropic = 26.0096 Anisotropy = 82.7387  
 XX= -36.8501 YX= 40.4249 ZX= -51.8353  
 XY= 16.4674 YY= 56.4990 ZY= 12.7989  
 XZ= -47.3295 YZ= 22.9146 ZZ= 58.3800  
 Eigenvalues: -66.9072 63.7674 81.1687  
 16 C Isotropic = 62.2710 Anisotropy = 102.3033  
 XX= 18.5871 YX= -9.0669 ZX= -38.9565  
 XY= -18.6293 YY= 55.3112 ZY= 12.8274  
 XZ= -37.3723 YZ= 14.2495 ZZ= 112.9147  
 Eigenvalues: 3.6001 52.7397 130.4732  
 17 N Isotropic = 97.8753 Anisotropy = 127.4901  
 XX= 104.6320 YX= -31.4558 ZX= -21.0301  
 XY= -27.8196 YY= 21.8094 ZY= 31.4640  
 XZ= -21.4835 YZ= 29.4931 ZZ= 167.1846  
 Eigenvalues: 8.9135 101.8437 182.8687  
 18 C Isotropic = 63.1341 Anisotropy = 119.9843  
 XX= 7.9582 YX= -4.1217 ZX= -48.8742  
 XY= 1.6851 YY= 63.5809 ZY= 21.5775  
 XZ= -54.2504 YZ= 19.6661 ZZ= 117.8631  
 Eigenvalues: -13.0075 59.2861 143.1236  
 19 C Isotropic = 71.7972 Anisotropy = 135.1267  
 XX= 52.0948 YX= 20.6850 ZX= -46.3871  
 XY= 17.0368 YY= 28.3872 ZY= 41.3529  
 XZ= -44.2679 YZ= 39.8146 ZZ= 134.9095  
 Eigenvalues: -6.3937 59.9036 161.8817  
 20 C Isotropic = 72.1641 Anisotropy = 141.1863  
 XX= 40.5767 YX= -28.7563 ZX= -40.1986  
 XY= -34.8723 YY= 22.7982 ZY= 23.6988  
 XZ= -23.7048 YZ= 12.4340 ZZ= 153.1174  
 Eigenvalues: -1.5255 51.7294 166.2883  
 21 I Isotropic = 3723.6289 Anisotropy = 2066.5348  
 XX= 4802.6967 YX= -251.2309 ZX= 634.7777  
 XY= -321.8899 YY= 2830.8730 ZY= -9.5987  
 XZ= 642.4356 YZ= -22.9790 ZZ= 3537.3171  
 Eigenvalues: 2780.3536 3289.2144 5101.3188  
 22 H Isotropic = 24.2443 Anisotropy = 10.0373  
 XX= 23.1160 YX= 4.2671 ZX= -3.0542  
 XY= 3.7324 YY= 28.1431 ZY= -0.5366  
 XZ= -3.7018 YZ= -0.8976 ZZ= 21.4738  
 Eigenvalues: 18.3657 23.4314 30.9359  
 23 H Isotropic = 24.0962 Anisotropy = 9.7096  
 XX= 25.1548 YX= 0.2514 ZX= -6.2548  
 XY= 0.6828 YY= 23.7705 ZY= 1.0270  
 XZ= -6.1878 YZ= 1.2938 ZZ= 23.3633  
 Eigenvalues: 17.7410 23.9783 30.5692

24 H Isotropic = 24.0219 Anisotropy = 10.2298  
 XX= 23.9110 YX= 1.1790 ZX= -4.5869  
 XY= 0.8507 YY= 22.3286 ZY= -1.6588  
 XZ= -6.0879 YZ= -2.2821 ZZ= 25.8260  
 Eigenvalues: 19.3532 21.8707 30.8418  
 25 H Isotropic = 23.8282 Anisotropy = 9.9772  
 XX= 21.7686 YX= 0.7406 ZX= -4.3236  
 XY= 1.6059 YY= 29.6066 ZY= 2.6658  
 XZ= -3.6854 YZ= 3.3523 ZZ= 20.1096  
 Eigenvalues: 16.1419 24.8631 30.4797  
 26 H Isotropic = 24.3457 Anisotropy = 5.6422  
 XX= 23.5530 YX= 1.0828 ZX= -1.1859  
 XY= 0.0591 YY= 27.2392 ZY= 2.2096  
 XZ= -1.1851 YZ= 2.2936 ZZ= 22.2448  
 Eigenvalues: 20.7628 24.1670 28.1071  
 27 H Isotropic = 23.0169 Anisotropy = 7.1038  
 XX= 24.9568 YX= 1.1109 ZX= 2.8983  
 XY= 0.9950 YY= 27.1077 ZY= -2.5956  
 XZ= 3.2266 YZ= -2.4258 ZZ= 16.9863  
 Eigenvalues: 15.3196 25.9784 27.7528  
 28 H Isotropic = 24.7038 Anisotropy = 3.7654  
 XX= 26.6690 YX= -0.0094 ZX= 1.7953  
 XY= 0.7536 YY= 25.4313 ZY= -0.7658  
 XZ= 1.5571 YZ= -0.9839 ZZ= 22.0109  
 Eigenvalues: 21.2557 25.6416 27.2140  
 29 H Isotropic = 25.3569 Anisotropy = 3.7104  
 XX= 27.1324 YX= 0.1720 ZX= 1.3880  
 XY= 0.3080 YY= 25.7149 ZY= -0.6608  
 XZ= 2.1904 YZ= -0.9842 ZZ= 23.2232  
 Eigenvalues: 22.3137 25.9264 27.8304  
 30 H Isotropic = 24.8633 Anisotropy = 11.6367  
 XX= 30.7043 YX= -0.7935 ZX= 3.3829  
 XY= -2.0440 YY= 23.7835 ZY= -1.0210  
 XZ= 5.7532 YZ= 0.6527 ZZ= 20.1020  
 Eigenvalues: 18.3857 23.5831 32.6211

## References

- 1 L. F. Gil-Silva, R. Santamaría-Fernández, A. Navarro-Vázquez, and R. R. Gil, *Chem. Eur. J.*, 2016, **22**, 472-476.
- 2 Y. Liu, A. Navarro-Vázquez, R. R. Gil, C. Griesinger, G. E. Martin and R. T. Williamson, *Nat. Protoc.*, 2019, **14**, 217–247.
- 3 Y. Liu and J. H. Prestegard, *J. Biomol. NMR*, 2010, **47**, 249–258.
- 4 H. Hu and K. Krishnamurthy, *J. Magn. Reson.*, 2006, **182**, 173–177.
- 5 G. W. Trucks, H. B. Schlegel, G. E. Scuseria, M. A. Robb, J. R. Cheeseman, G. Scalmani, V. Barone, G. A. Petersson, H. Nakatsuji, X. Li, M. Caricato, A. V. Marenich, J. Bloino, B. G. Janesko, R. Gomperts, B. Mennucci, H. P. Hratchian, J. V. Ortiz, A. F. Izmaylov, J. L. Sonnenberg, D. Williams-Young, F. Ding, F. Lipparini, F. Egidi, J. Goings, B. Peng, A. Petrone, T. Henderson, D. Ranasinghe, V. G. Zakrzewski, J. Gao, N. Rega, G. Zheng, W. Liang, M. Hada, M. Ehara, K. Toyota, R. Fukuda, J. Hasegawa, M. Ishida, T. Nakajima, Y. Honda, O. Kitao, H. Nakai, T. Vreven, K. Throssell, J. A. (Jr) Montgomery, J. E. Peralta, F. Ogliaro, M. J. Bearpark, J. J. Heyd, E. N. Brothers, K. N. Kudin, V. N. Staroverov, T. A. Keith, R. Kobayashi, J. Normand, K. Raghavachari, A. P. Rendell, J. C. Burant, S. S. Iyengar, J. Tomasi, M. Cossi, J. M. Millam, M. Klene, C. Adamo, R. Cammi, J. W. Ochterski, R. L. Martin, K. Morokuma, O. Farkas, J. B. Foresman and D. J. Fox, 2016, Gaussian, Inc., Wallingford CT.
- 6 K. L. Schuchardt, B. T. Didier, T. Elsethagen, L. Sun, V. Gurumoorthi, J. Chase, J. Li and T. L. Windus, *J. Chem. Inf. Model.*, 2007, **47**, 1045–1052.
- 7 D. Feller, *J. Comput. Chem.*, 1996, **17**, 1571–1586.
- 8 F. E. Jorge, A. Canal Neto, G. G. Camiletti and S. F. Machado, *J. Chem. Phys.*, 2009, **130**, 064108.
- 9 C. T. Campos and F. E. Jorge, *Mol. Phys.*, 2013, **111**, 167–173.
